# Supplementary material for: Classification of Clinical Isolates of Klebsiella pneumoniae Based on Their in vitro Biofilm Forming Capabilities and Elucidation of the Biofilm Matrix Chemistry With Special Reference to the Protein Content
Source: PubMed Central journal article supplement (PMC6458294; doi:10.3389/fmicb.2019.00669), 2019-04-04
Supplement: Data_Sheet_1.pdf [file Data_Sheet_1.pdf]

**Classification of Clinical Isolates of *Klebsiella pneumoniae* based on its *in vitro*  
Biofilm forming ability and Chemistry of its Biofilm Matrix with reference to  
its Protein content**

Ashish Kumar Singh, Shivangi Yadav, Brijesh Singh Chauhan, Nabarun Nandy,  
Rajan Singh, Kaushik Neogi, Jagat Kumar Roy, Saripella Srikrishna, Rakesh Kumar  
Singh, Pradyot Prakash

**Supplementary Data Sheet**

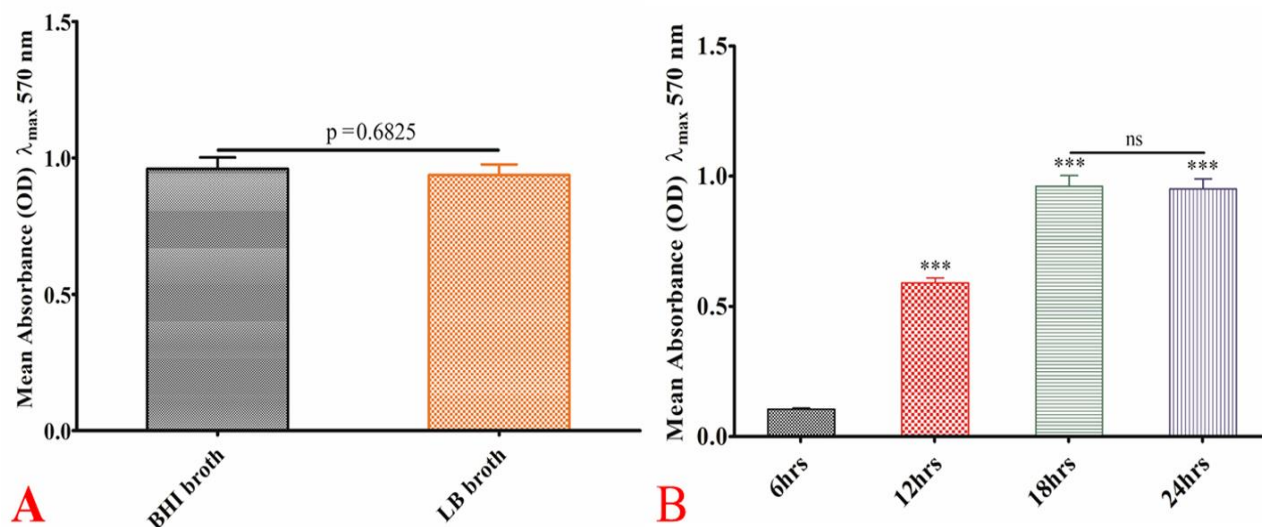

**Figure S1: A.** Comparison of mean absorbances of isolates grown in BHI and LB broths showing insignificant difference ( $P=0.6825$ ). Data shown in Figure 1A are representative results of three independent experiments. No significant difference was observed in absorbance values when BHI broth was used as the growth medium as compared to LB ( $P=0.6825$ ,  $P<0.05$ ) (Supplementary data 1). However, the average absorbance values of all the clinical isolates were higher in BHI broth. For instance, the average absorbance for *S. epidermidis* ATCC 35984 was  $1.957\pm 0.028$  {absorbance (OD) $\pm$ SD} in BHI broth, which was 1.737% higher when compared with average absorbance in LB broth ( $1.923\pm 0.019$ ). Similarly, for *S. epidermidis* ATCC 35983, average absorbance was  $0.579\pm 0.023$  in BHI broth, which was 4.3% higher when compared with average absorbance in LB broth ( $0.554\pm 0.019$ ). The results are shown as the mean  $\pm$  SD of a quadruplicate assay. **B.** Comparative evaluation of the effect of incubation periods on the biofilm formation. Around 85% of the *K. pneumoniae* isolates showed detectable biofilm after 6 hrs of incubation. Bacterial adherence to the microtiter plate emerged to be a function of time till 18 hrs (with increased linearity). The increase in absorbance after 24 hrs was not significant in comparison to incubation for 18 hrs. Each strain was grown in BHI broth under static conditions at 37°C for 24 hours. Absorbance at  $\lambda_{max}$  600 was measured at different time points during culture. The reference strains were found to form maximum biofilm after 18 hrs with resultant average absorbance  $0.991\pm 0.021$  for ATCC 35984 and  $0.102\pm 0.017$  for ATCC 12228. It was observed that after 6 hrs of incubation, the majority of the *K. pneumoniae* isolates displayed smaller absorbances with average value ranging from  $0.01\pm 0.0011$  to  $0.274\pm 0.0410$ . After 18 hrs of incubation, all isolates were found to produce biofilms. For instance, the average absorbance for one of the isolates of *K. pneumoniae* (Isolate no. 2895) was  $1.24\pm 0.04$ ,  $2.254\pm 0.02$  and  $2.17\pm 0.04$  at 12 hrs, 18 hrs and 24 hrs, respectively. The identical pattern was also observed for other isolates. No significant ( $P\geq 0.05$ ) difference in absorbance was observed after 24 hrs of incubation compared to 18 hrs of incubation (Supplementary data 2). The results are shown as the mean  $\pm$  SD of a quadruplicate assay.

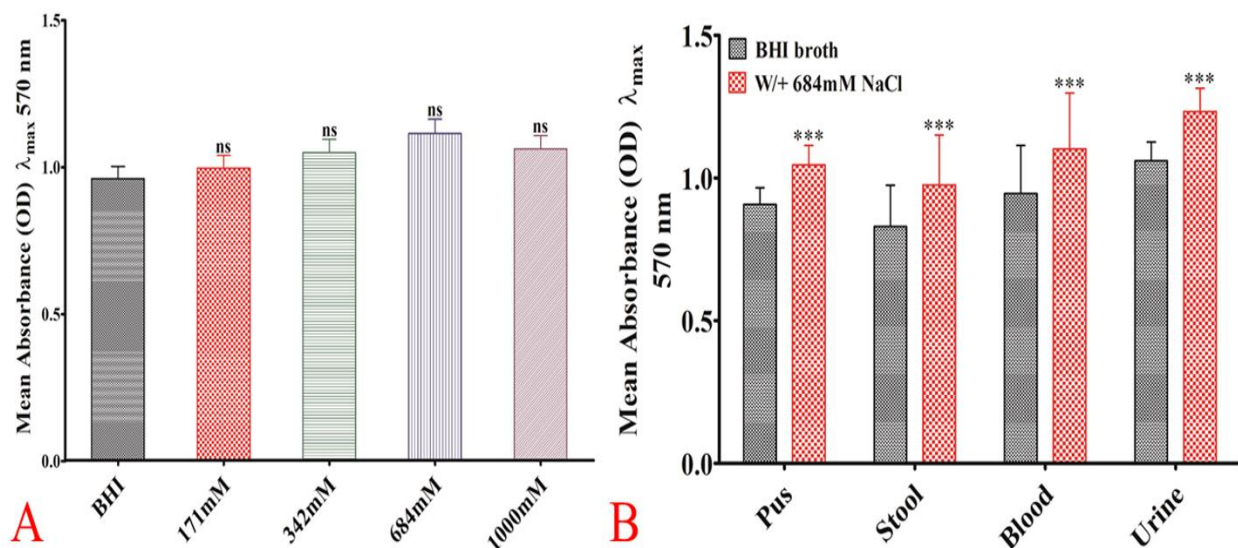

**Figure S2: A.** Comparative evaluation of the effect of salt concentration (sodium chloride) on biofilm formation. The increase in salt concentration positively enhanced the biofilm formation however; after the supplementation of 684mM NaCl, we noticed maximum biofilm production. Of note, the 2-fold increase in NaCl concentrations although enhanced the biofilm formation but the increase was insignificant. Almost all isolates showed enhanced biofilm formation when the salt concentration was increased from 171mM to 684mM at 37°C. Although the increase in absorbance was not significant, the optimal salt concentration for biofilm formation was found to be 684mM at 37°C. The results are shown as the mean  $\pm$  SD of a quadruplicate assay. **B.** Comparative evaluation of the effect of NaCl concentration on biofilm formation among different isolates. The results are shown as the mean  $\pm$  SD of a quadruplicate assay. The stool and blood isolates have shown more augmented biofilm formation (17.58% and 16.46% increase respectively) compared to urine (16.349%) and pus (15.33%) isolates when supplemented with 684mM NaCl ( $P \leq 0.05$ ) (Supplementary data 3).

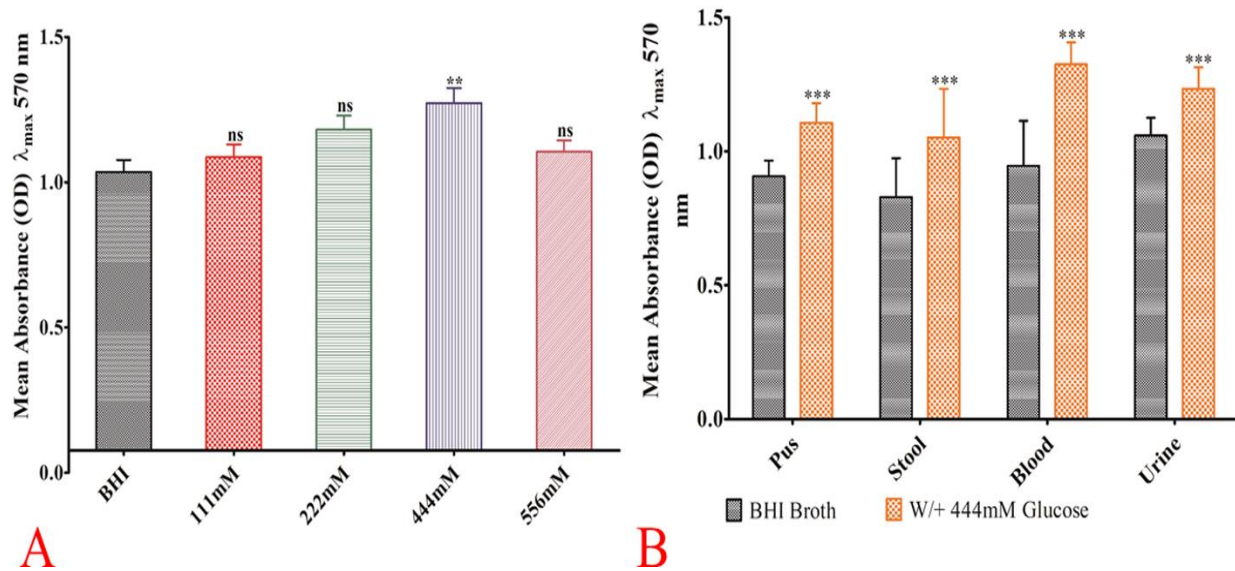

**Figure S3: A.** Sample wise comparative evaluation of the effect of glucose concentration on biofilm formation. Unlike salt supplementation, most of the clinical isolates displayed enhanced biofilm formation when fortified with glucose. As the concentration of glucose was increased from 111mM to 444mM, all the clinical isolates formed thicker biofilms at 37°C compared to when grown in BHI broth alone. Strikingly, at the supplemented concentration of 556mM glucose, almost all the isolates showed substantial reduction in biofilm formation at 37°C. The results are shown as the mean  $\pm$  SD of a quadruplicate assay. **B.** Sample wise comparative evaluation of the effect of glucose concentration on biofilm formation. The average absorbance values were found to be  $1.1070 \pm 0.07344$ ,  $1.0520 \pm 0.1818$ ,  $1.3250 \pm 0.08199$ , and  $1.2333 \pm 0.08093$  for the biofilms of the pus, stool, blood, and urine isolates grown in BHI with 444mM glucose supplementation (Supplementary Figure S3b, Supplementary data 4). Unlike salt supplementation, after the supplementation of 444mM glucose, blood isolates have shown maximum increment ( $P \leq 0.01$ ) in their biofilm formation while urine isolates have shown the least. The results are shown as the mean  $\pm$  SD of a quadruplicate assay.

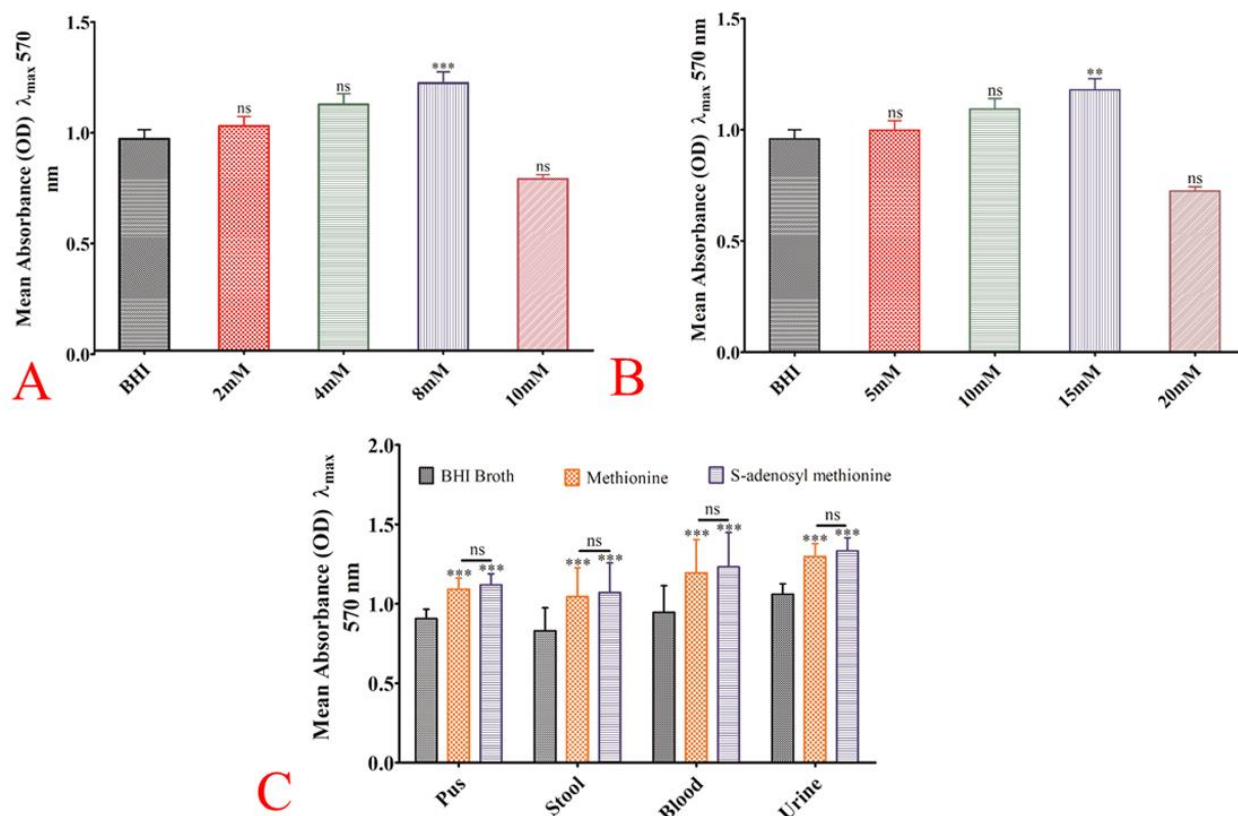

**Figure S4: A.** Comparative evaluation of the effect of methionine on biofilm formation. The biofilm formation of all the clinical isolates was notably reinforced by methionine and S-adenosyl methionine at the concentrations below 10mM and 20mM respectively. Methionine supplementation resulted in the densest biofilm formation by *Klebsiella* isolates at the concentration of 8mM (Supplementary data 5). The results are shown as the mean  $\pm$  SD of a quadruplicate assay. **B.** Comparative evaluation of the effect of S-adenosyl methionine on biofilm formation. S-adenosyl methionine supplementation resulted in the densest biofilm formation by *Klebsiella* isolates at the concentration of 15mM (Supplementary data 5). The results are shown as the mean  $\pm$  SD of a quadruplicate assay. **C.** Sample wise comparative evaluation of the effect of methionine and S-adenosyl methionine on biofilm formation. The highest percent fold surge in mean absorbance of the biofilm was observed in blood isolates (26.202% for Methionine and 23.206% for S-adenosyl methionine) accompanied by stool (25.346%, 22.53%), urine (22.358%, 20.48%) and pus (13.463%, 18.954%) isolates respectively when enriched with 8mM methionine and 15mM S-adenosyl methionine. The results are shown as the mean  $\pm$  SD of a quadruplicate assay.

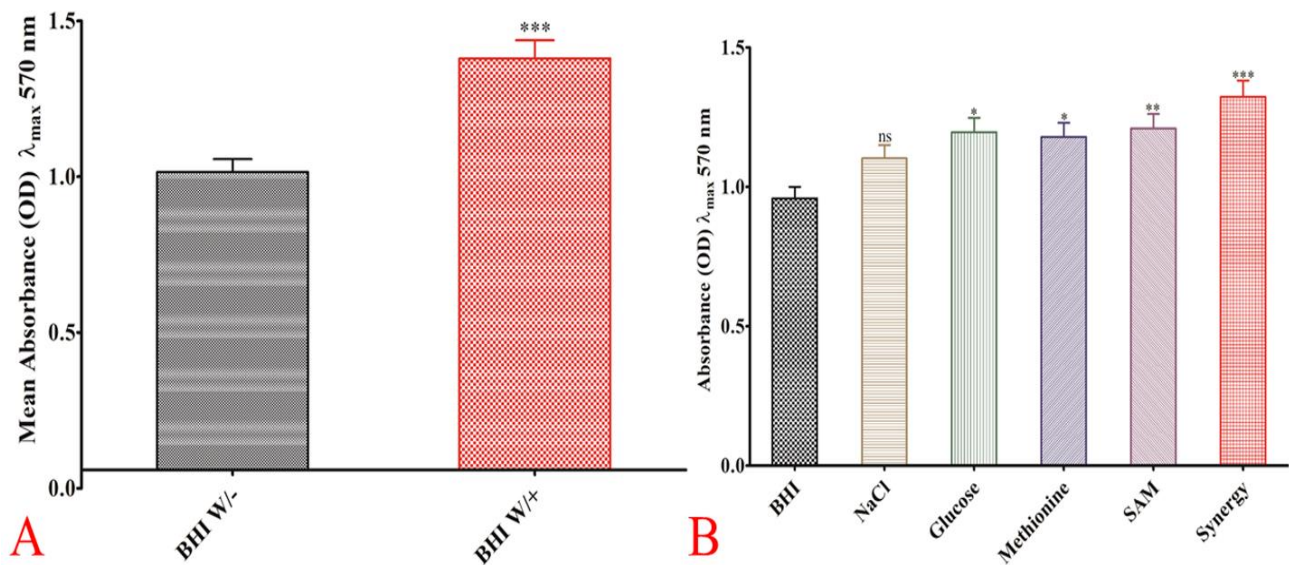

**Figure S5: A.** Comparative evaluation of the synergistic effect of supplementations on the biofilm forming capacity of *Klebsiella* isolates. The mean absorbance for the biofilms formed by these isolates increased almost 38% after supplementation ( $1.323 \pm 0.05814$ ) compared to the unsupplemented broth ( $0.9589 \pm 0.04124$ ) at  $37^\circ\text{C}$  ( $P \leq 0.001$ ). The results are shown as the mean  $\pm$  SD of a quadruplicate assay. **B.** Sample wise comparison of the effect of supplementations (444mM Glucose, 684mM NaCl and 20mM methionine and 10mM S-adenosyl methionine) on biofilm formation. Individual supplementation with 10mM SAM enhanced the biofilm absorbance maximally by 26.3% followed by glucose (24.725%), methionine (23.057%). However, individual supplementation by NaCl enhanced biofilm absorbance by 15.027%. Among all the isolates, the most pronounced effect of supplement mix was observed on blood isolates (46.284% increase in absorbance) while the least was observed in case of pus isolates (32.098%). The results are shown as the mean  $\pm$  SD of a quadruplicate assay.

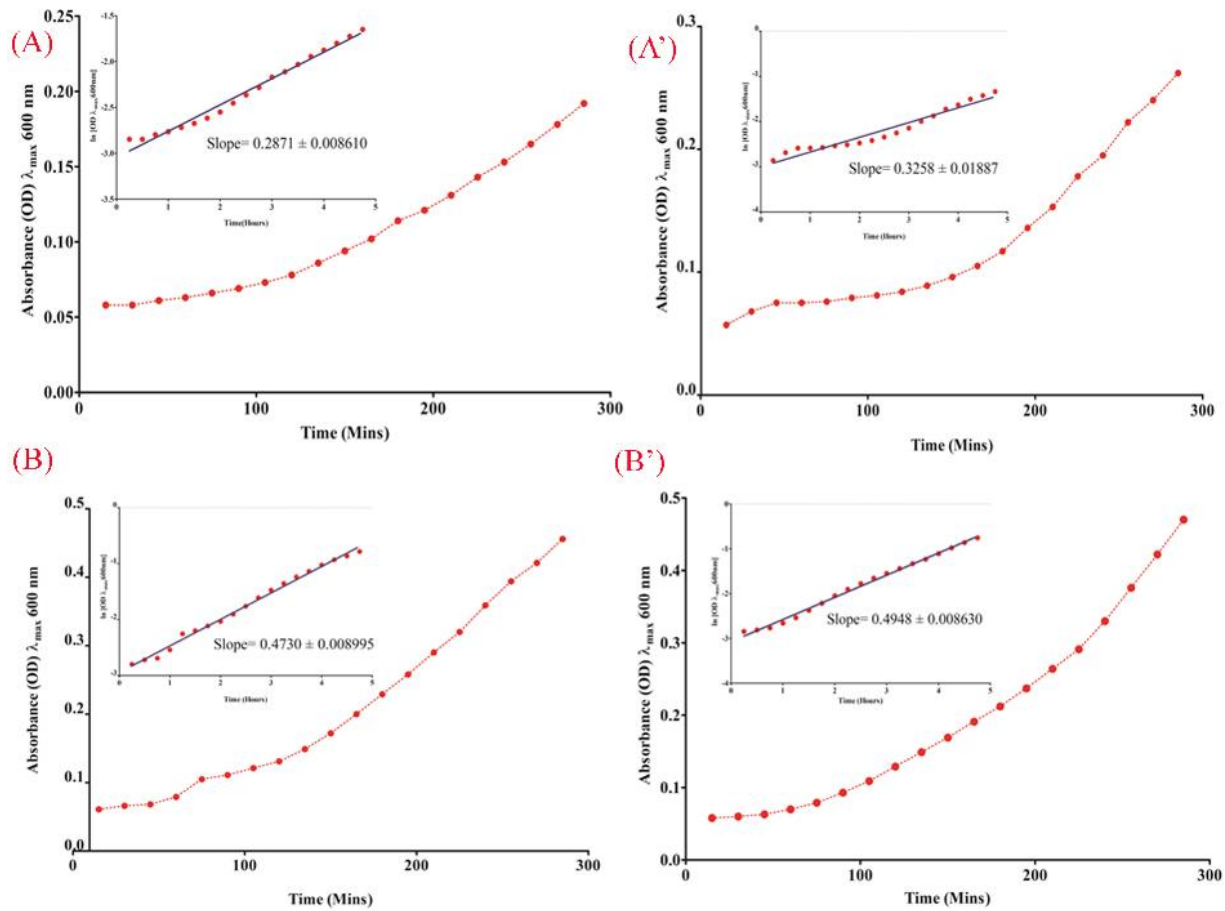

**Figure S6:** Graphical representation of observed growth rates of urine isolate 10894 before (A) and after (A') supplementation and of pus isolate 2884 before (B) and after (B') supplementation.

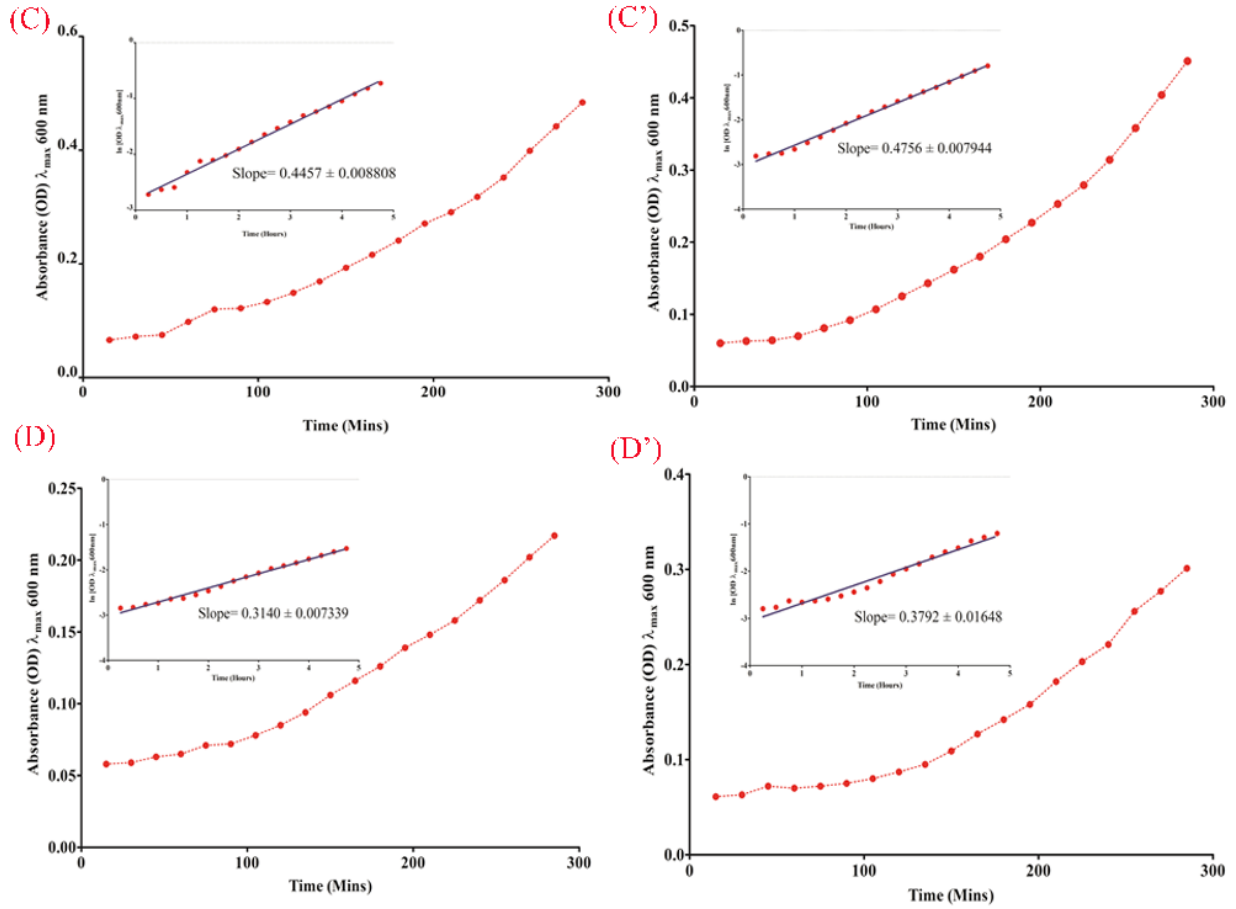

**Figure S7:** Graphical representation of observed growth rates of blood isolate 1739 before (C) and after (C') supplementation and of stool isolate 197 before (D) and after (D') supplementation.



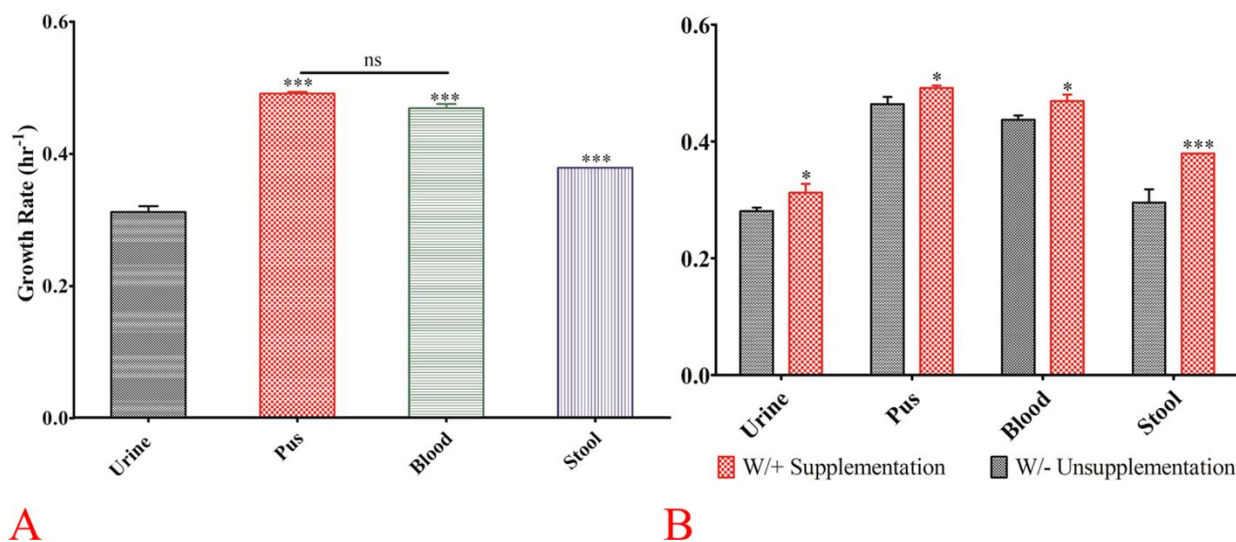

**Figure S8: A.** Sample wise comparative evaluation of the growth rates before supplementations. Isolates from different sample types had significantly different growth rates in BHI broth at 37°C ( $P \leq 0.001$ ). In unsupplemented state, we found pus isolates to be the fastest growing while the urine isolates the slowest. The results are shown as the mean  $\pm$  SD of a quadruplicate assay. **B.** Sample wise comparative evaluation of the growth rates after supplementations. Upon supplementation, astonishingly, we observed the highest increase in the growth rate of stool isolates (17.194%) followed by urine (11.878%) while the least effect on the growth of pus isolates (4.405%) was noted. The results are shown as the mean  $\pm$  SD of a quadruplicate assay.

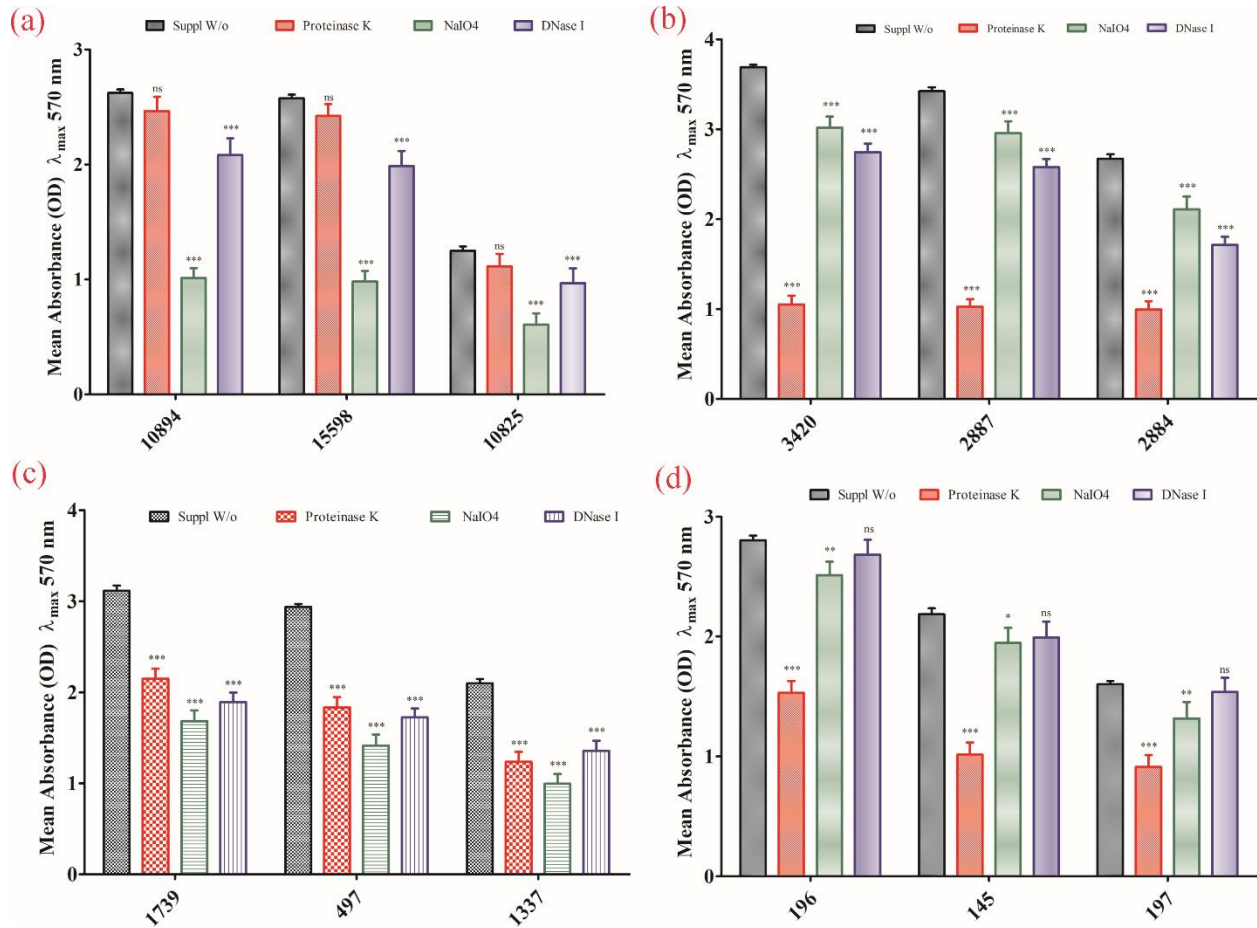

**Figure S9: a.** Biofilm matrix digestion of Urine isolates by various chemicals. Digestion by sodium metaperiodate (NaIO<sub>4</sub>) was highly pronounced among urine isolates showing the sugar richness. **b.** Biofilm matrix digestion of pus isolates by various chemicals. Digestion by Proteinase K was highly pronounced among these isolates showing the predominance of proteins in their biofilms. **c.** Biofilm matrix digestion of Blood isolates by various chemicals. The extent of digestion by Proteinase K and NaIO<sub>4</sub> both were comparable and highly pronounced among blood isolates showing the co-dominance of proteins and sugars both in their biofilms. **d.** Biofilm matrix digestion of stool isolates by various chemicals. The extent of digestion by Proteinase K was significant compared to that of NaIO<sub>4</sub> showing the predominance of proteins. Of note, we found the digestion by NaIO<sub>4</sub> to be least effective, indicating the sparse distribution of sugars in their biofilm matrix. The results are shown as the mean  $\pm$  SD of a quadruplicate assay.

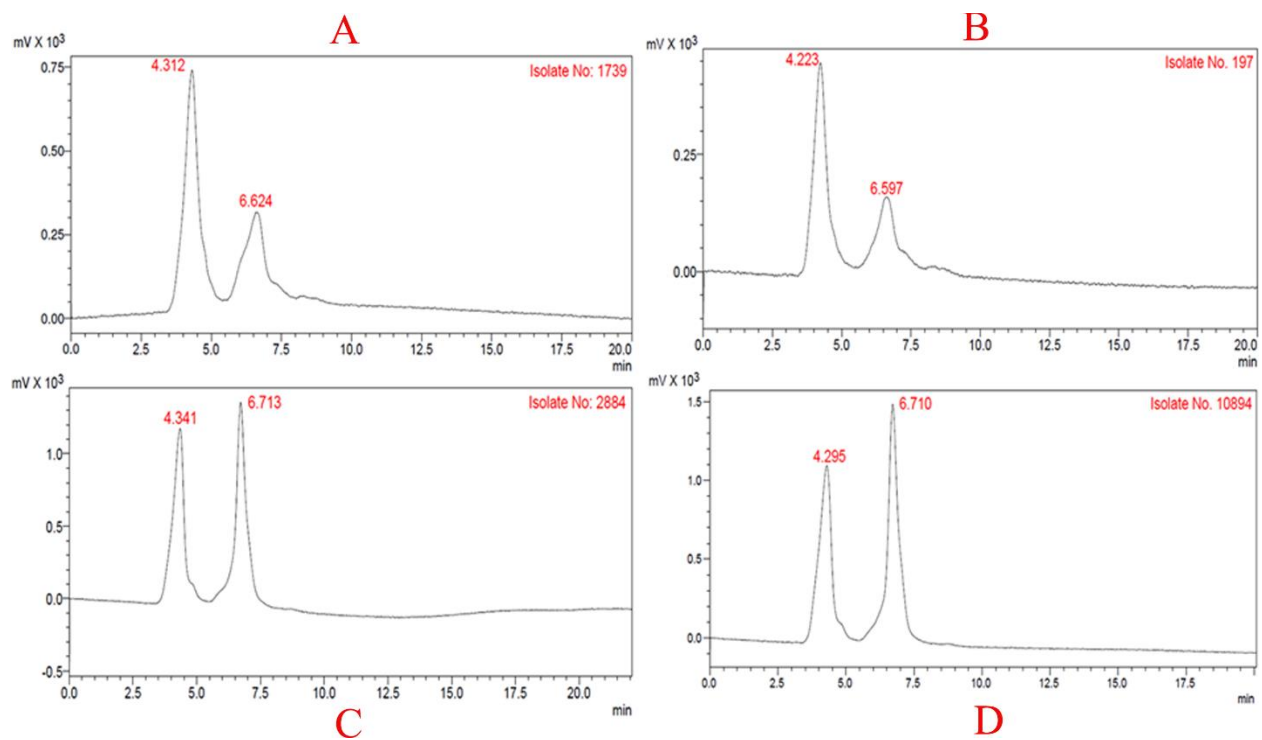

**Figure S10:** Analytical HPLC chromatogram of common protein(s) bands (~35kDa) as observed in SDS-PAGE. Panels A to D represent the chromatogram of the representative *K. pneumoniae* isolates obtained from blood, stool, pus, and urine samples respectively. Note the two sharp peaks of the peptides with almost similar retention times (Rt) throughout the panels A to D.

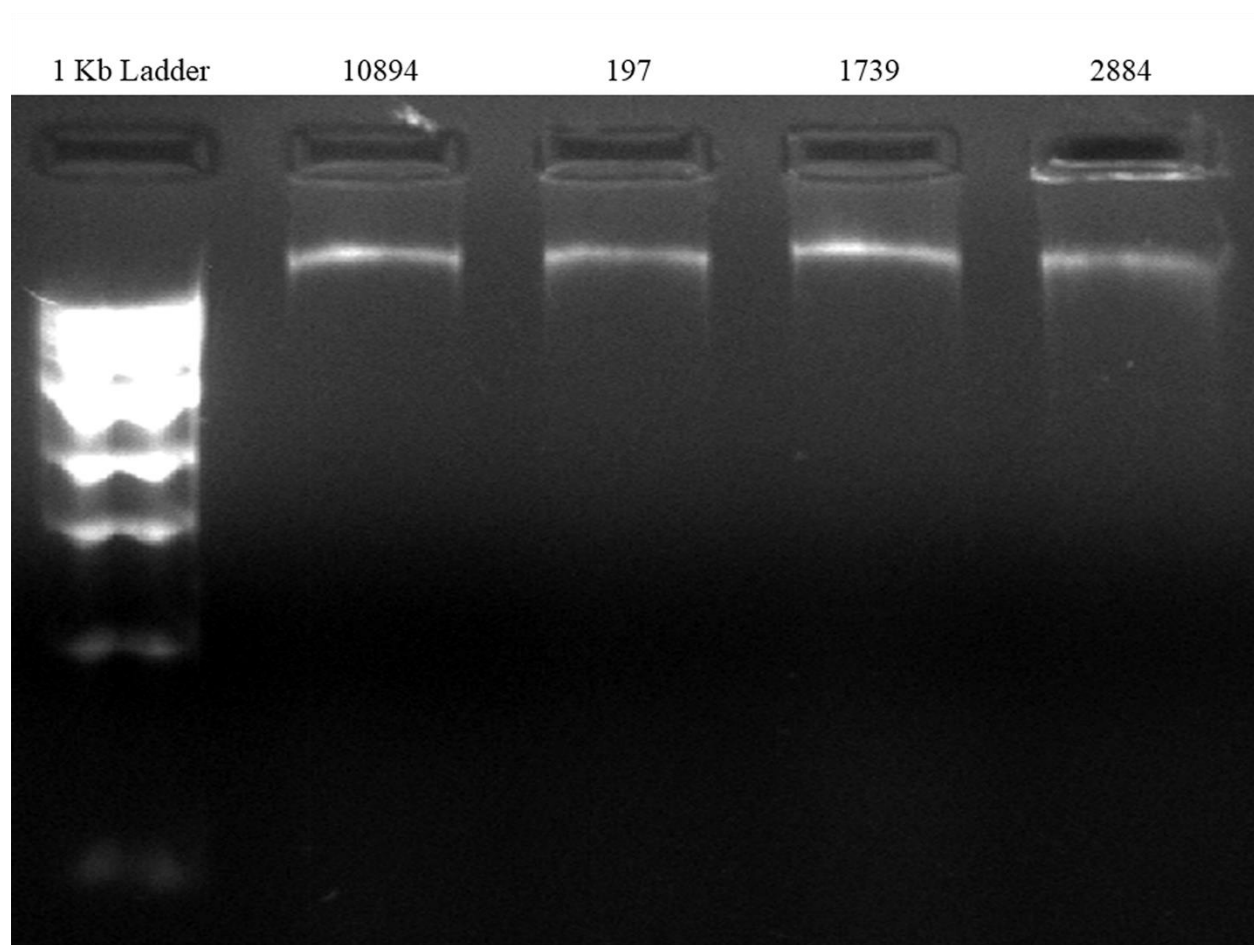

**Figure S11:** 1.0% agarose gel image of the purified *e*DNA of the biofilm matrices of the four representative isolates. The gel electrophoresis was executed for *e*DNA to check its tentative molecular weight and band width. The gel image shows the same molecular weight and the comparable bandwidth indicating the presence of common structural organization of matrix utilizing *e*DNA.

**Supplementary table 1: Details of the number of *Klebsiella* isolates showing exaggerated biofilm response leading to major shift in biofilm category**

|                                |                                                                                                                                                                                        |                                                                                                                                                           |
|--------------------------------|----------------------------------------------------------------------------------------------------------------------------------------------------------------------------------------|-----------------------------------------------------------------------------------------------------------------------------------------------------------|
| Shifting after supplementation | <p><b>Potentiated moderate biofilm-former (pMBF)</b><br/>(n=47)</p> <p><b>From</b><br/>Weak biofilm formers (LBF)</p> <p><b>To</b><br/>Potentiated moderate biofilm formers (pMBF)</p> | <p><b>Super biofilm-former (SBF)</b><br/>(n=12)</p> <p><b>From</b><br/>Moderate biofilm formers (MBF)</p> <p><b>To</b><br/>Super biofilm-former (SBF)</p> |
|                                | <p>(n=0)</p> <p>Moderate biofilm formers (MBF)</p> <p><b>To</b><br/>Potentiated moderate biofilm formers (pMBF)</p> <p>(n=45)</p>                                                      | <p>(n=4)</p> <p>High biofilm formers (HBF)</p> <p><b>To</b><br/>Super biofilm-former (SBF)</p> <p>(n=8)</p>                                               |

**Supplementary table 2: The mean growth rates of high slime producing *Klebsiella pneumoniae* isolates from different sources of isolation in BHI broth before and after supplementation**

| <b>Isolate number</b> | <b>Source</b> | <b>BHI (Biofilm OD)</b> | <b>Supplemented BHI (Biofilm OD)</b> | <b>Growth rate (BHI)</b> | <b>Growth rate (Supplemented BHI)</b> |
|-----------------------|---------------|-------------------------|--------------------------------------|--------------------------|---------------------------------------|
| 10894                 | Urine         | 2.623                   | 4.059                                | 0.2871±0.008610          | 0.3258±0.01887                        |
| 15598                 | Urine         | 2.576                   | 3.986                                | 0.2798±0.008801          | 0.3151±0.01500                        |
| 10825                 | Urine         | 1.25                    | 1.689                                | 0.2751±0.006068          | 0.2959±0.01481                        |
| 3420                  | Pus           | 3.689                   | 4.958                                | 0.4730±0.008995          | 0.4948±0.008630                       |
| 2887                  | Pus           | 3.423                   | 3.991                                | 0.4691±0.01116           | 0.4927±0.00824                        |
| 2884                  | Pus           | 2.672                   | 3.684                                | 0.4504±0.008579          | 0.4869±0.008071                       |
| 1739                  | Blood         | 3.118                   | 4.125                                | 0.4457±0.008808          | 0.4756±0.07944                        |
| 497                   | Blood         | 2.939                   | 3.938                                | 0.4331±0.007093          | 0.4758±0.01006                        |
| 1337                  | Blood         | 2.099                   | 3.019                                | 0.4326±0.01279           | 0.4564±0.008271                       |
| 197                   | Stool         | 2.804                   | 3.943                                | 0.3140±0.007339          | 0.3792±0.01648                        |
| 145                   | Stool         | 2.186                   | 3.115                                | 0.3022±0.007583          | 0.3795±0.01648                        |
| 196                   | Stool         | 1.602                   | 1.935                                | 0.2704±0.01131           | 0.3792±0.01648                        |

**Supplementary table 3: Effect of different chemicals on the biofilm matrix of isolates from different sources in terms of biofilm reduction**

| <b>Sl. No.</b> | <b>Isolates</b> | <b>Reagents</b>   | <b>Absorbance without treatment</b> | <b>Absorbance upon treatment</b> | <b>Percent Reduction</b> |
|----------------|-----------------|-------------------|-------------------------------------|----------------------------------|--------------------------|
| <b>1.</b>      | Pus             | Proteinase K      |                                     | 1.432±0.0162                     | 56.06%                   |
|                |                 | NaIO <sub>4</sub> | 3.261±0.3045                        | 1.2936±0.2935                    | 60.33%                   |
|                |                 | DNase I           |                                     | 2.360±0.3194                     | 27.6%                    |
| <b>2.</b>      | Urine           | Proteinase K      |                                     | 2.0±0.44                         | 6.976%                   |
|                |                 | NaIO <sub>4</sub> | 2.15±0.45                           | 0.9322±0.1301                    | 56.641%                  |
|                |                 | DNase I           |                                     | 1.679±0.3567                     | 21.906%                  |
| <b>3.</b>      | Blood           | Proteinase K      |                                     | 0.8547±0.2669                    | 68.567%                  |
|                |                 | NaIO <sub>4</sub> | 2.719±0.3141                        | 1.1343±0.199                     | 58.279%                  |
|                |                 | DNase I           |                                     | 1.9561±0.1588                    | 28.058%                  |
| <b>4.</b>      | Stool           | Proteinase K      |                                     | 0.7909±0.1916                    | 64.004%                  |
|                |                 | NaIO <sub>4</sub> | 2.197±0.3470                        | 2.0161±0.3457                    | 8.23%                    |
|                |                 | DNase I           |                                     | 1.646±0.3332                     | 25.07%                   |

**Supplementary table 4: Annotated high performance liquid chromatogram peak(s) and its characteristic parameters of the representative isolates**

| <b>Isolates</b> | <b>Retention time (R<sub>t</sub> 1) in Mins</b> | <b>Retention time (R<sub>t</sub> 2) in Mins</b> | <b>Peak Area (A 1)</b> | <b>Peak Area (A 2)</b> | <b>Height (H 1)</b> | <b>Height (H 2)</b> |
|-----------------|-------------------------------------------------|-------------------------------------------------|------------------------|------------------------|---------------------|---------------------|
| <b>1739</b>     | 4.312                                           | 6.624                                           | 25585                  | 9770                   | 701                 | 222                 |
| <b>197</b>      | 4.223                                           | 6.597                                           | 13477                  | 2680                   | 425                 | 96                  |
| <b>2884</b>     | 4.341                                           | 6.713                                           | 38363                  | 42507                  | 1195                | 1389                |
| <b>10894</b>    | 4.295                                           | 6.710                                           | 36967                  | 43848                  | 1107                | 1495                |



**Supplementary table 5: Protein estimation by Bradford's method**

| <b>Isolate Number</b> | <b>Source</b> | <b>Protein content (<math>\mu\text{g/ml}</math>)</b> |
|-----------------------|---------------|------------------------------------------------------|
| 2884                  | Pus           | <b>265.6<math>\pm</math>3.786</b>                    |
| 10894                 | Urine         | <b>246.1<math>\pm</math>1.651</b>                    |
| 197                   | Stool         | <b>309.1<math>\pm</math>3.055</b>                    |
| 1739                  | Blood         | <b>525.2<math>\pm</math>2.082</b>                    |

**Supplementary table 6: eDNA estimation of the biofilm matrix**

| <b>Isolate Number</b> | <b>Source</b> | <b>eDNA content (ng/μl)</b> |
|-----------------------|---------------|-----------------------------|
| 2884                  | Pus           | <b>660.7±24.26</b>          |
| 10894                 | Urine         | <b>679.6±31.24</b>          |
| 197                   | Stool         | <b>657.6±19.49</b>          |
| 1739                  | Blood         | <b>894.2±24.57</b>          |

# ***MALDI MS MS Data Sheet for Stool Isolates***

Supplementary Data 10

Comment 1

Comment 2

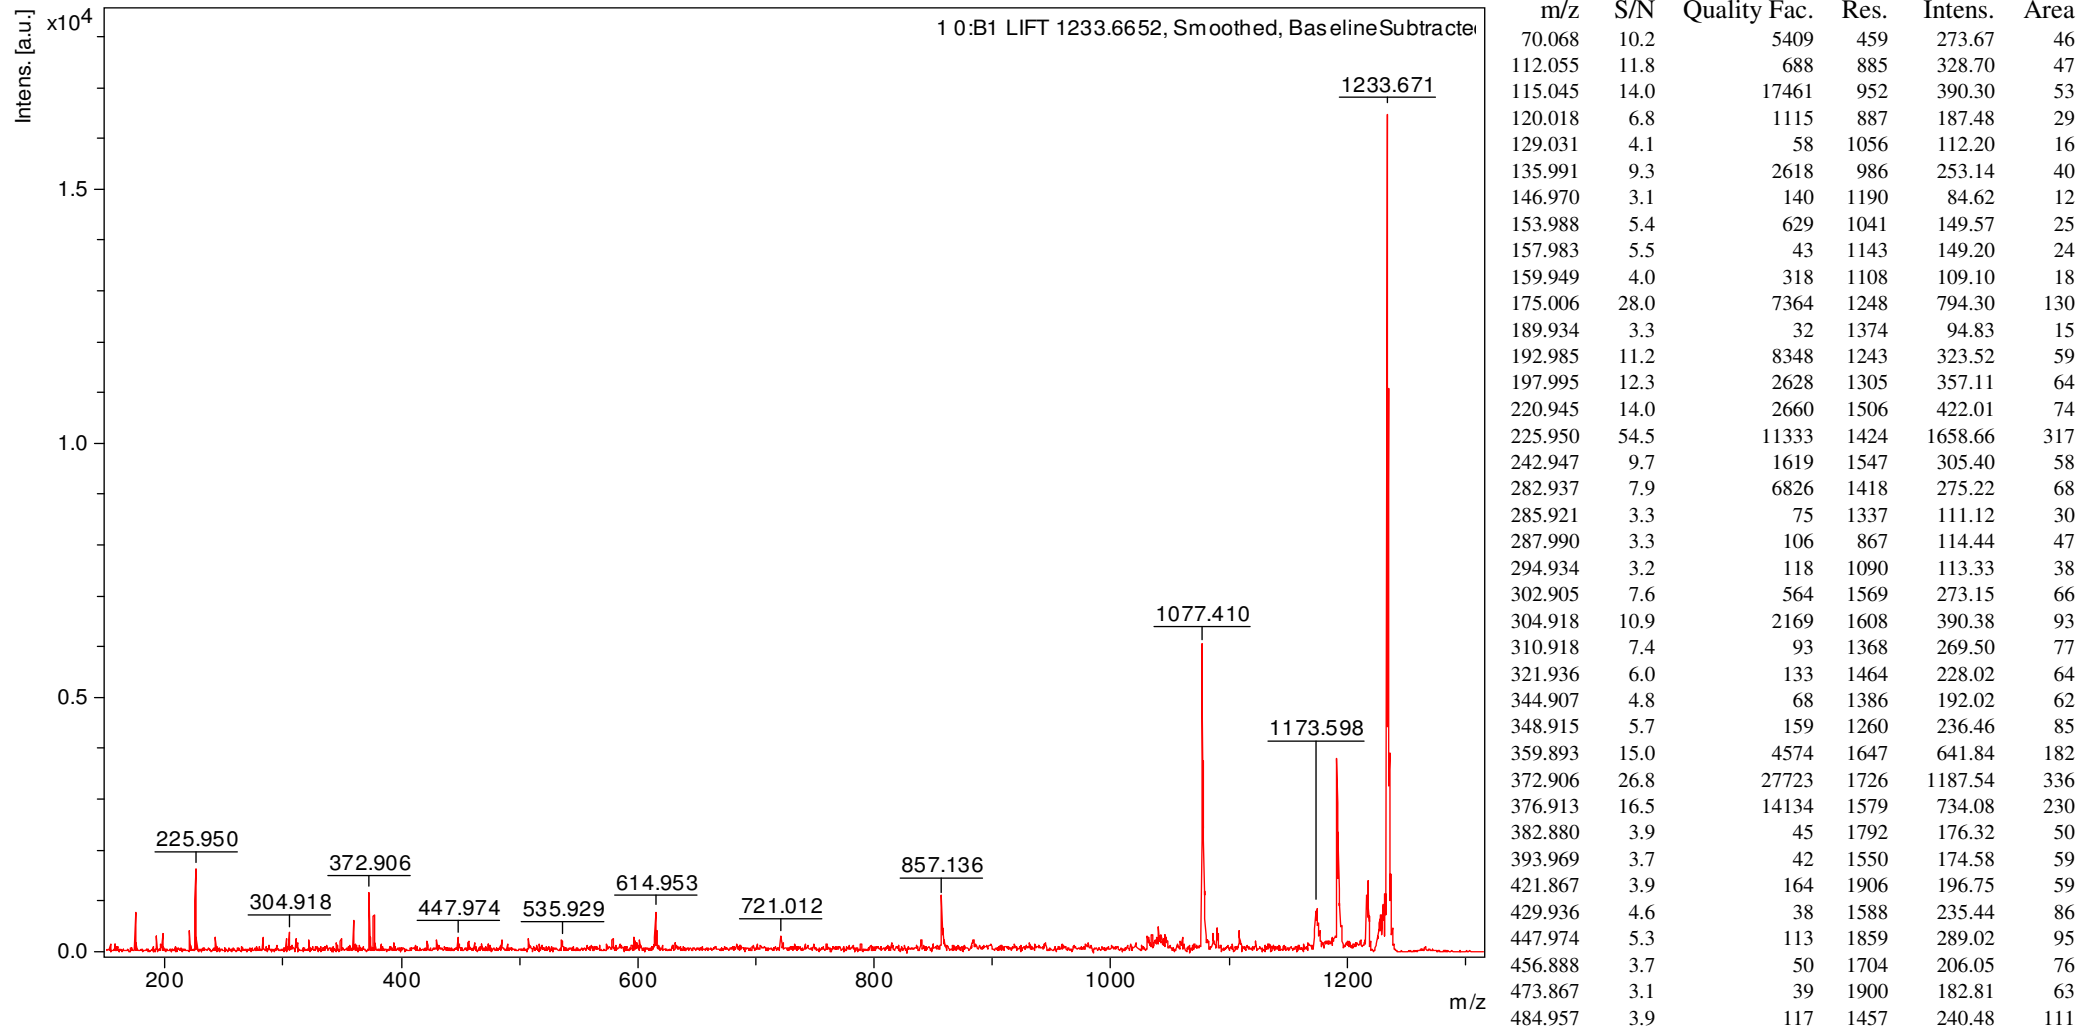

| m/z      | S/N   | Quality | Fac. | Res.     | Intens. | Area |
|----------|-------|---------|------|----------|---------|------|
| 507.882  | 4.2   | 123     | 1649 | 270.76   | 118     |      |
| 535.929  | 3.7   | 119     | 1386 | 250.47   | 139     |      |
| 578.911  | 3.3   | 65      | 1723 | 243.83   | 120     |      |
| 614.953  | 10.6  | 1106    | 2101 | 824.38   | 364     |      |
| 721.012  | 3.5   | 96      | 1109 | 308.74   | 322     |      |
| 857.136  | 10.4  | 1623    | 1588 | 1062.27  | 992     |      |
| 1040.603 | 4.1   | 34      | 1867 | 493.92   | 528     |      |
| 1046.058 | 3.2   | 44      | 1835 | 378.85   | 416     |      |
| 1077.410 | 50.0  | 65736   | 2136 | 6039.84  | 6002    |      |
| 1086.565 | 3.0   | 126     | 2038 | 364.30   | 385     |      |
| 1090.141 | 4.0   | 340     | 2333 | 490.49   | 455     |      |
| 1173.598 | 9.1   | 632     | 1893 | 938.28   | 1213    |      |
| 1175.832 | 3.7   | 80      | 1866 | 374.74   | 493     |      |
| 1191.591 | 37.2  | 35486   | 2438 | 3638.72  | 3744    |      |
| 1216.686 | 15.4  | 1519    | 2388 | 1361.16  | 1482    |      |
| 1218.946 | 3.3   | 337     | 3683 | 284.46   | 201     |      |
| 1226.771 | 6.7   | 54      | 1589 | 568.78   | 944     |      |
| 1229.053 | 8.4   | 51      | 2121 | 717.19   | 896     |      |
| 1231.344 | 10.4  | 57      | 2733 | 883.30   | 858     |      |
| 1233.671 | 197.2 | 100212  | 3463 | 16603.22 | 12762   |      |

Comment 1

Comment 2

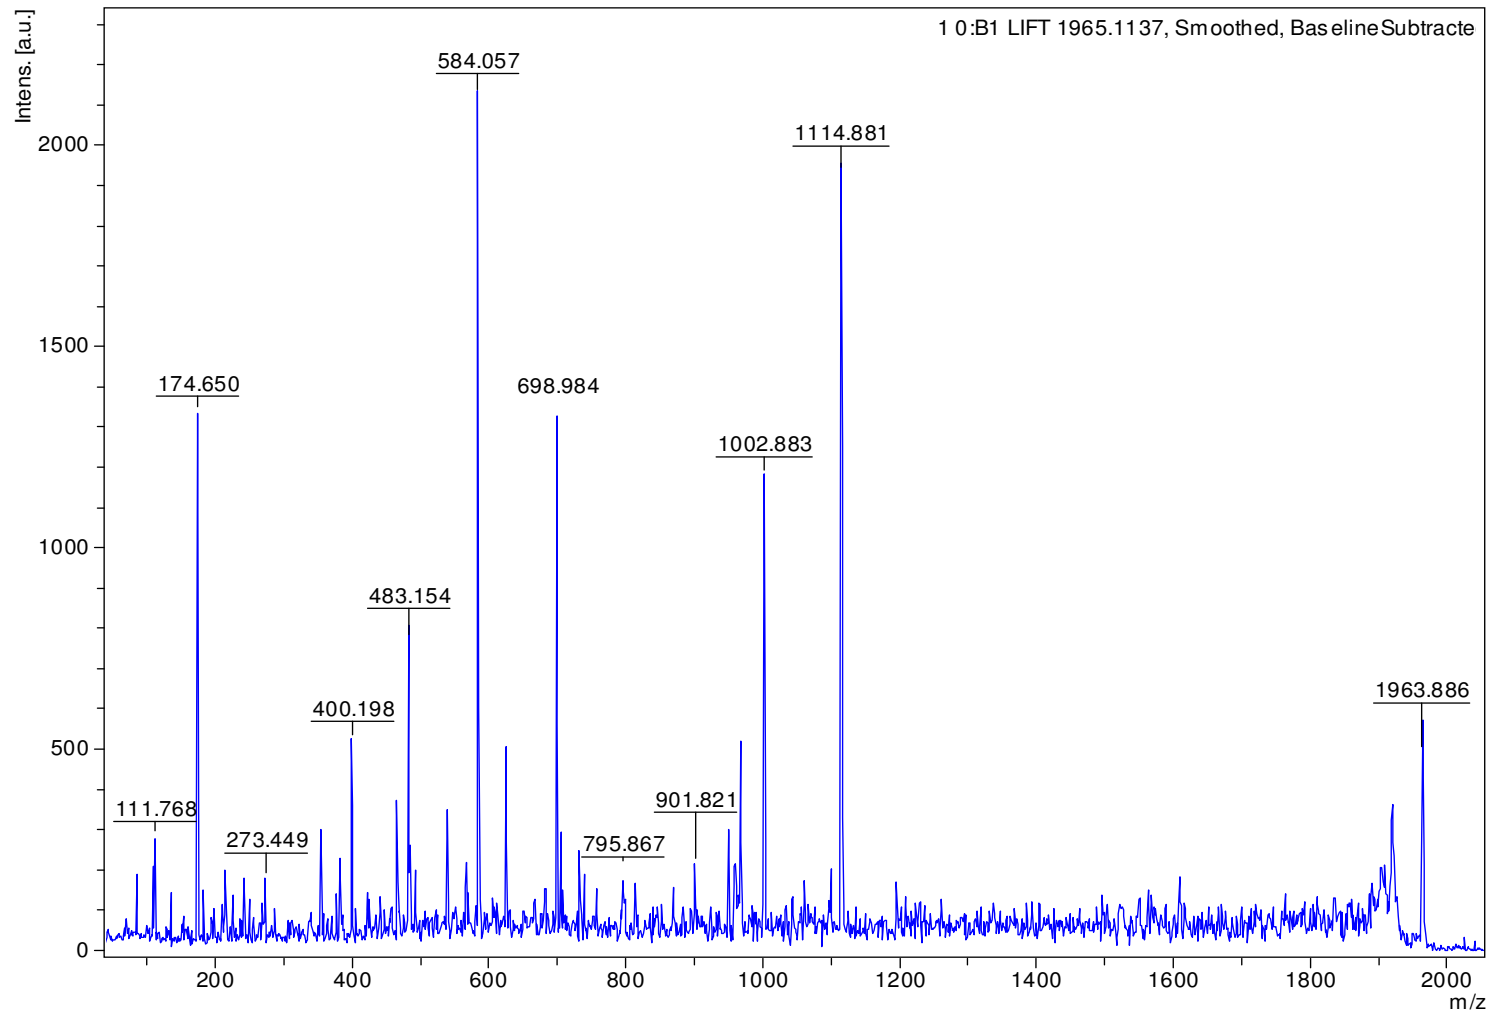

| m/z     | S/N  | Quality Fac. | Res. | Intens. | Area |
|---------|------|--------------|------|---------|------|
| 69.812  | 3.4  | 91           | 491  | 81.22   | 13   |
| 85.829  | 7.4  | 873          | 734  | 176.72  | 23   |
| 109.753 | 8.5  | 1786         | 1117 | 204.67  | 23   |
| 111.768 | 11.8 | 20258        | 1297 | 283.03  | 27   |
| 135.712 | 6.1  | 2760         | 1402 | 142.73  | 16   |
| 174.650 | 58.6 | 19275        | 1377 | 1338.50 | 198  |
| 182.645 | 6.0  | 1004         | 1096 | 138.10  | 27   |
| 194.575 | 4.1  | 34           | 1452 | 94.97   | 15   |
| 198.663 | 4.2  | 86           | 1175 | 96.10   | 19   |
| 210.607 | 4.9  | 347          | 1152 | 115.11  | 25   |
| 215.523 | 8.5  | 427          | 1223 | 196.45  | 41   |
| 226.543 | 6.0  | 172          | 1140 | 139.21  | 33   |
| 237.485 | 3.3  | 33           | 1934 | 78.07   | 12   |
| 242.501 | 7.3  | 349          | 1271 | 170.98  | 40   |
| 250.487 | 5.4  | 329          | 1792 | 128.14  | 22   |
| 256.470 | 3.9  | 37           | 1004 | 91.68   | 29   |
| 269.397 | 5.7  | 97           | 1609 | 136.37  | 28   |
| 273.449 | 7.4  | 956          | 1587 | 179.61  | 38   |
| 287.460 | 4.1  | 97           | 1674 | 103.33  | 22   |
| 355.275 | 10.0 | 2255         | 1715 | 292.44  | 79   |
| 370.232 | 3.0  | 35           | 2459 | 92.78   | 18   |
| 378.233 | 4.3  | 283          | 1848 | 135.55  | 36   |
| 383.231 | 7.7  | 87           | 1424 | 244.44  | 87   |
| 400.198 | 15.7 | 5048         | 1484 | 521.68  | 187  |
| 422.173 | 4.3  | 47           | 1620 | 149.96  | 53   |
| 426.226 | 3.4  | 114          | 1492 | 120.38  | 46   |
| 466.171 | 9.1  | 378          | 1786 | 355.04  | 128  |
| 483.154 | 19.2 | 1635         | 1882 | 770.71  | 275  |
| 493.075 | 4.8  | 297          | 1551 | 195.07  | 87   |
| 540.121 | 7.7  | 848          | 1639 | 343.65  | 162  |
| 567.046 | 4.6  | 141          | 2222 | 213.35  | 79   |
| 569.995 | 3.3  | 53           | 2366 | 154.20  | 54   |
| 584.057 | 44.6 | 59222        | 1862 | 2125.95 | 980  |
| 606.030 | 3.0  | 64           | 2386 | 145.43  | 55   |
| 625.959 | 10.2 | 3914         | 1804 | 504.02  | 265  |
| 698.984 | 26.1 | 66753        | 2287 | 1352.72 | 654  |
| 704.989 | 5.3  | 244          | 1984 | 277.50  | 156  |
| 732.967 | 5.1  | 187          | 1922 | 265.96  | 163  |

| m/z      | S/N  | Quality Fac. | Res. | Intens. | Area |
|----------|------|--------------|------|---------|------|
| 738.935  | 3.8  | 333          | 1967 | 195.71  | 119  |
| 795.867  | 3.9  | 34           | 2324 | 208.26  | 119  |
| 901.821  | 3.8  | 233          | 2442 | 216.03  | 142  |
| 950.822  | 4.5  | 219          | 2767 | 256.62  | 161  |
| 967.863  | 9.0  | 2026         | 2556 | 521.32  | 364  |
| 1002.883 | 20.0 | 85180        | 2284 | 1179.20 | 973  |
| 1114.881 | 31.5 | 33218        | 2430 | 1930.88 | 1784 |
| 1903.946 | 4.1  | 71           | 3911 | 193.11  | 294  |
| 1908.591 | 3.4  | 78           | 2569 | 161.65  | 376  |
| 1919.807 | 7.2  | 490          | 2272 | 328.32  | 869  |
| 1963.886 | 12.8 | 958          | 4893 | 494.66  | 624  |

Comment 1

Comment 2

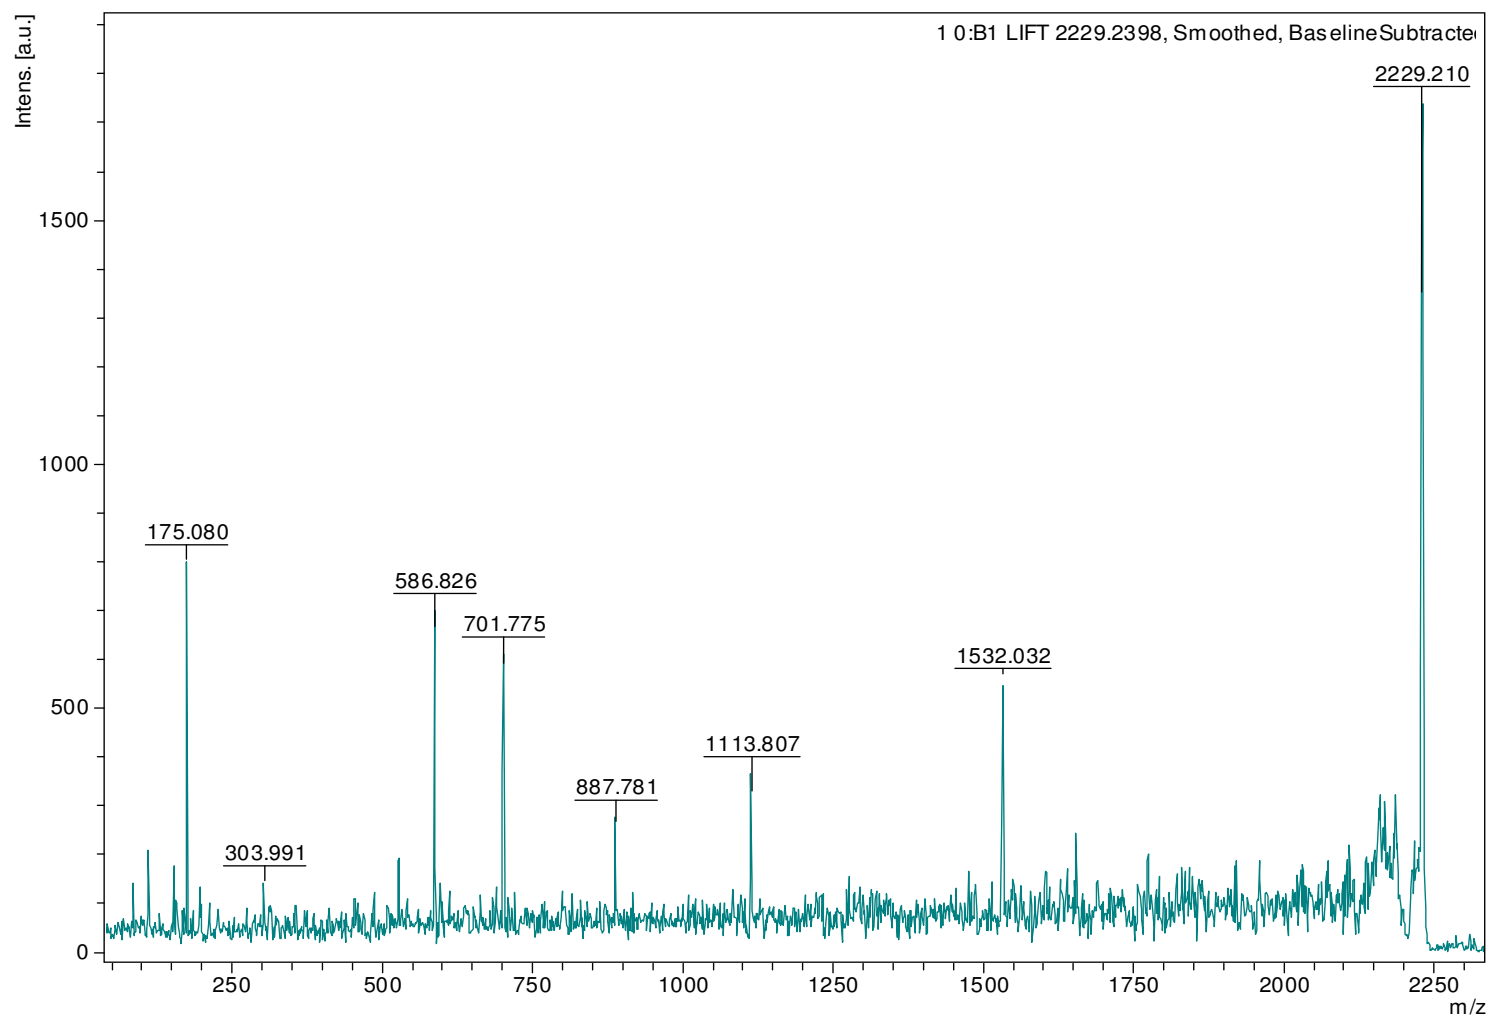

| m/z      | S/N  | Quality Fac. | Res. | Intens. | Area |
|----------|------|--------------|------|---------|------|
| 86.095   | 3.7  | 318          | 888  | 132.47  | 14   |
| 112.099  | 5.8  | 4262         | 1131 | 209.83  | 23   |
| 154.076  | 5.0  | 708          | 1240 | 171.83  | 24   |
| 157.520  | 3.0  | 296          | 1602 | 103.83  | 12   |
| 175.080  | 23.2 | 13888        | 1205 | 793.82  | 135  |
| 197.082  | 4.3  | 260          | 1048 | 144.46  | 32   |
| 213.030  | 3.2  | 33           | 865  | 107.68  | 32   |
| 303.991  | 3.8  | 227          | 1228 | 135.23  | 42   |
| 527.795  | 4.1  | 108          | 1297 | 201.81  | 117  |
| 586.826  | 12.4 | 9724         | 1771 | 656.38  | 320  |
| 701.775  | 9.9  | 12059        | 1907 | 582.11  | 339  |
| 887.781  | 3.9  | 226          | 1916 | 257.58  | 210  |
| 1113.807 | 4.2  | 205          | 2752 | 319.62  | 260  |
| 1532.032 | 6.0  | 1540         | 2508 | 559.64  | 876  |
| 2150.750 | 3.1  | 31           | 4027 | 196.21  | 335  |
| 2158.627 | 4.1  | 64           | 2397 | 257.36  | 742  |
| 2165.298 | 3.3  | 89           | 3326 | 202.64  | 423  |
| 2168.224 | 3.8  | 119          | 3072 | 231.81  | 525  |
| 2213.218 | 3.1  | 104          | 2741 | 166.76  | 436  |
| 2229.210 | 25.3 | 14503        | 4266 | 1341.53 | 2274 |



Comment 1

Comment 2

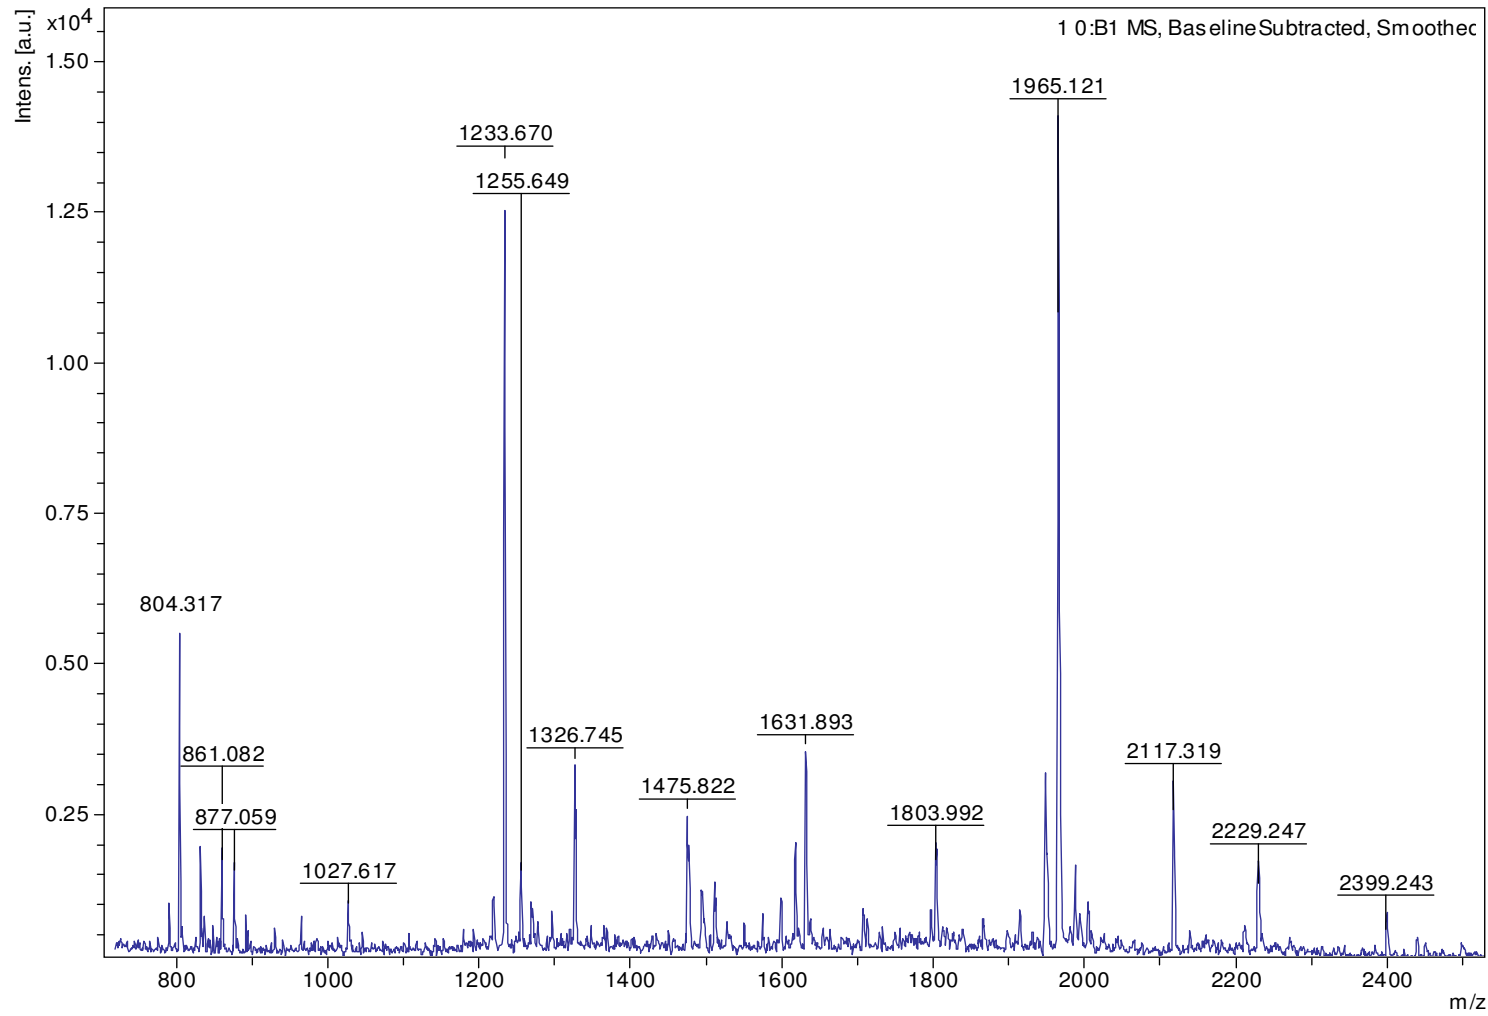

| m/z      | S/N  | Quality Fac. | Res. | Intens.  | Area |
|----------|------|--------------|------|----------|------|
| 790.462  | 6.9  | 843          | 6070 | 942.72   | 216  |
| 804.317  | 42.4 | 6172         | 5917 | 5779.46  | 1387 |
| 832.350  | 13.4 | 1914         | 5114 | 1826.25  | 526  |
| 861.082  | 12.1 | 1600         | 5837 | 1666.02  | 429  |
| 877.059  | 10.7 | 569          | 5818 | 1483.75  | 399  |
| 1027.617 | 6.5  | 535          | 5784 | 931.21   | 323  |
| 1233.670 | 88.8 | 31051        | 8131 | 13319.41 | 4639 |
| 1255.649 | 9.8  | 1852         | 6814 | 1486.09  | 616  |
| 1269.671 | 6.1  | 208          | 6093 | 924.11   | 434  |
| 1326.745 | 22.1 | 11217        | 8403 | 3353.71  | 1277 |
| 1475.822 | 16.4 | 15650        | 9197 | 2514.78  | 1068 |
| 1477.780 | 7.0  | 1493         | 8072 | 1078.91  | 502  |
| 1494.883 | 7.0  | 572          | 6100 | 1064.15  | 667  |
| 1511.904 | 8.1  | 3724         | 8026 | 1233.09  | 609  |
| 1617.881 | 12.7 | 2817         | 8784 | 1924.65  | 988  |
| 1631.893 | 23.8 | 34192        | 9043 | 3577.56  | 1825 |
| 1803.992 | 11.7 | 3302         | 7377 | 1659.11  | 1252 |
| 1947.078 | 7.5  | 619          | 7733 | 940.75   | 756  |
| 1949.066 | 19.8 | 6629         | 8417 | 2495.57  | 1853 |
| 1965.121 | 86.9 | 12181        | 8794 | 10760.25 | 7834 |
| 1967.186 | 22.5 | 891          | 6835 | 2781.92  | 2554 |
| 1988.112 | 9.4  | 2140         | 7469 | 1132.43  | 969  |
| 2117.319 | 24.3 | 48010        | 9033 | 2501.34  | 1953 |
| 2229.247 | 14.0 | 1350         | 7998 | 1272.66  | 1172 |
| 2399.243 | 6.9  | 2736         | 5618 | 504.27   | 744  |


**Mascot Search Results**

User : sanovar  
 Email : sanovar@sandor.co.in  
 Search title :  
 MS data file : DATA.TXT  
 Database : SwissProt 2018\_06 (557713 sequences; 200130199 residues)  
 Taxonomy : Bacteria (Eubacteria) (333552 sequences)  
 Timestamp : 11 Jul 2018 at 11:29:47 GMT  
 Warning : **A Peptide summary report will usually give a much clearer picture of MS/MS search results.**  
 Top Score : 138 for **EFTU1\_ECO24**, Elongation factor Tu 1 OS=Escherichia coli O139:H28 (strain E24377A / ETEC) OX=331111 GN=tuf1 PI

### Mascot Score Histogram

Protein score is  $-10 \cdot \log(P)$ , where P is the probability that the observed match is a random event.  
 Protein scores greater than 68 are significant ( $p < 0.05$ ).  
 Protein scores are derived from ions scores as a non-probabilistic basis for ranking protein hits.

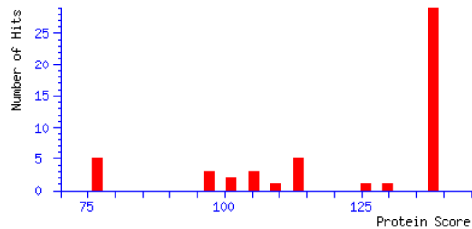

### Protein Summary Report

Format As  [Help](#)  
 Significance threshold  $p <$   Max. number of hits   
 Preferred taxonomy

### Index

| Accession                       | Mass  | Score | Description                                                                                                   |
|---------------------------------|-------|-------|---------------------------------------------------------------------------------------------------------------|
| 1. <a href="#">EFTU1_ECO24</a>  | 43427 | 138   | Elongation factor Tu 1 OS=Escherichia coli O139:H28 (strain E24377A / ETEC) OX=331111 GN=tuf1 PE=3 SV=1       |
| 2. <a href="#">EFTU1_ECOHS</a>  | 43427 | 138   | Elongation factor Tu 1 OS=Escherichia coli O9:H4 (strain HS) OX=331112 GN=tuf1 PE=3 SV=1                      |
| 3. <a href="#">EFTU1_ECOK1</a>  | 43427 | 138   | Elongation factor Tu 1 OS=Escherichia coli O1:K1 / APEC OX=405955 GN=tuf1 PE=3 SV=2                           |
| 4. <a href="#">EFTU1_ECOL5</a>  | 43427 | 138   | Elongation factor Tu 1 OS=Escherichia coli O6:K15:H31 (strain 536 / UPEC) OX=362663 GN=tuf1 PE=3 SV=1         |
| 5. <a href="#">EFTU1_ECOLC</a>  | 43427 | 138   | Elongation factor Tu 1 OS=Escherichia coli (strain ATCC 8739 / DSM 1576 / Crooks) OX=481805 GN=tuf1 PE=3 SV=1 |
| 6. <a href="#">EFTU1_ECOLI</a>  | 43427 | 138   | Elongation factor Tu 1 OS=Escherichia coli (strain K12) OX=83333 GN=tufA PE=1 SV=1                            |
| 7. <a href="#">EFTU1_ECOUT</a>  | 43427 | 138   | Elongation factor Tu 1 OS=Escherichia coli (strain UTI89 / UPEC) OX=364106 GN=tuf1 PE=1 SV=1                  |
| 8. <a href="#">EFTU1_SHIF8</a>  | 43426 | 138   | Elongation factor Tu 1 OS=Shigella flexneri serotype 5b (strain 8401) OX=373384 GN=tuf1 PE=3 SV=1             |
| 9. <a href="#">EFTU1_SHISS</a>  | 43427 | 138   | Elongation factor Tu 1 OS=Shigella sonnei (strain Ss046) OX=300269 GN=tuf1 PE=3 SV=1                          |
| 10. <a href="#">EFTU2_ECO24</a> | 43456 | 138   | Elongation factor Tu 2 OS=Escherichia coli O139:H28 (strain E24377A / ETEC) OX=331111 GN=tuf2 PE=3 SV=1       |
| 11. <a href="#">EFTU2_ECOHS</a> | 43457 | 138   | Elongation factor Tu 2 OS=Escherichia coli O9:H4 (strain HS) OX=331112 GN=tuf2 PE=3 SV=1                      |
| 12. <a href="#">EFTU2_ECOK1</a> | 43457 | 138   | Elongation factor Tu 2 OS=Escherichia coli O1:K1 / APEC OX=405955 GN=tuf2 PE=3 SV=1                           |
| 13. <a href="#">EFTU2_ECOL5</a> | 43457 | 138   | Elongation factor Tu 2 OS=Escherichia coli O6:K15:H31 (strain 536 / UPEC) OX=362663 GN=tuf2 PE=3 SV=1         |
| 14. <a href="#">EFTU2_ECOLC</a> | 43457 | 138   | Elongation factor Tu 2 OS=Escherichia coli (strain ATCC 8739 / DSM 1576 / Crooks) OX=481805 GN=tuf2 PE=3 SV=1 |
| 15. <a href="#">EFTU2_ECOLI</a> | 43457 | 138   | Elongation factor Tu 2 OS=Escherichia coli (strain K12) OX=83333 GN=tufB PE=1 SV=1                            |
| 16. <a href="#">EFTU2_ECOUT</a> | 43457 | 138   | Elongation factor Tu 2 OS=Escherichia coli (strain UTI89 / UPEC) OX=364106 GN=tuf2 PE=3 SV=2                  |
| 17. <a href="#">EFTU2_SHIF8</a> | 43457 | 138   | Elongation factor Tu 2 OS=Shigella flexneri serotype 5b (strain 8401) OX=373384 GN=tuf2 PE=3 SV=1             |
| 18. <a href="#">EFTU2_SHISS</a> | 43457 | 138   | Elongation factor Tu 2 OS=Shigella sonnei (strain Ss046) OX=300269 GN=tuf2 PE=3 SV=1                          |
| 19. <a href="#">EFTU_ECO57</a>  | 43457 | 138   | Elongation factor Tu OS=Escherichia coli O157:H7 OX=83334 GN=tufA PE=3 SV=2                                   |
| 20. <a href="#">EFTU_ECOL6</a>  | 43457 | 138   | Elongation factor Tu OS=Escherichia coli O6:H1 (strain CFT073 / ATCC 700928 / UPEC) OX=199310 GN=tufA PI      |

### Results List

1. [EFTU1\\_ECO24](#) Mass: 43427 Score: 138 Expect: 5.3e-09 Matches: 11  
 Elongation factor Tu 1 OS=Escherichia coli O139:H28 (strain E24377A / ETEC) OX=331111 GN=tuf1 PE=3 SV=1

| Observed  | Mr(expt)  | Mr(calc)  | ppm  | Start | End   | Miss | Ions | Peptide                             |
|-----------|-----------|-----------|------|-------|-------|------|------|-------------------------------------|
| 837.5072  | 836.4999  | 836.4868  | 15.7 | 118   | - 124 | 0    | ---  | R.EHILLGR.Q                         |
| 1027.6166 | 1026.6093 | 1026.5822 | 26.4 | 271   | - 280 | 0    | ---  | R.AGENVGVLLR.G                      |
| 1214.6581 | 1213.6508 | 1213.6230 | 22.9 | 305   | - 314 | 0    | ---  | K.FESEVYILSK.D                      |
| 1233.6701 | 1232.6629 | 1232.6091 | 43.6 | 326   | - 334 | 0    | 15   | K.GYRPFYFR.T                        |
| 1315.7305 | 1314.7232 | 1314.6060 | 89.1 | 254   | - 264 | 1    | ---  | K.STCTGVEMFRK.L                     |
| 1574.9723 | 1573.9650 | 1573.9304 | 22.0 | 290   | - 304 | 0    | ---  | R.GQVLAKPGTIKPHTK.F                 |
| 1728.9325 | 1727.9253 | 1727.8366 | 51.3 | 305   | - 319 | 1    | ---  | K.FESEVYILSKDEGGR.H                 |
| 1797.0350 | 1796.0277 | 1795.9325 | 53.1 | 359   | - 374 | 0    | ---  | K.MVVTLIHPIAMDGLR.F + Oxidation (M) |
| 1803.9918 | 1802.9845 | 1802.8799 | 58.0 | 60    | - 75  | 0    | ---  | R.GITINTSHVEYDTPTR.H                |
| 1965.1206 | 1964.1134 | 1963.9527 | 81.8 | 156   | - 172 | 0    | 44   | R.ELLSQYDFPGDDTPIVR.G               |
| 2117.3190 | 2116.3117 | 2116.1568 | 73.2 | 206   | - 224 | 0    | 28   | R.AIDKPFLLPIEDVFSISGR.G             |

No match to: 723.3202, 725.3349, 790.4618, 804.3175, 832.3504, 848.3077, 855.0634, 861.0816, 877.0593, 879.0642, 893.0384, 897.0395, 930.4819, 941.5245, 965.5432, 985.5503, 1001.5439, 1046.5846, 1179.6348, 1193.6685, 1219.5995, 1255.6486, 1269.6710, 1271.6285, 1277.6571, 1296.7322, 1320.6617, 1326.7448, 1348.7190, 1368.7612, 1450.7841, 1472.8880, 1475.8216, 1477.7796, 1494.8828, 1497.7996, 1509.8403, 1511.9038, 1527.8609, 1550.8947, 1598.9195, 1617.8806, 1631.8934, 1654.9031, 1707.9342, 1712.9042, 1733.0067, 1749.9856, 1755.9948, 1818.0212, 1866.0850, 1898.0605, 1915.0945, 1931.0593, 1947.0781, 1949.0662, 1967.1856, 1981.0932, 1988.1120, 1994.1406, 2005.1346, 2010.0916, 2139.2472, 2211.2249, 2229.2467, 2233.2426, 2271.2633, 2384.1999, 2399.2428, 2439.4144, 2451.4028, 2498.4046, 2615.4719, 2705.3847, 2808.6002, 3284.5981

2. [EFTU1\\_ECOHS](#) Mass: 43427 Score: 138 Expect: 5.3e-09 Matches: 11  
 Elongation factor Tu 1 OS=Escherichia coli O9:H4 (strain HS) OX=331112 GN=tuf1 PE=3 SV=1

| Observed | Mr(expt) | Mr(calc) | ppm  | Start | End   | Miss | Ions | Peptide     |
|----------|----------|----------|------|-------|-------|------|------|-------------|
| 837.5072 | 836.4999 | 836.4868 | 15.7 | 118   | - 124 | 0    | ---  | R.EHILLGR.Q |

|           |           |           |      |           |   |     |                                      |
|-----------|-----------|-----------|------|-----------|---|-----|--------------------------------------|
| 1027.6166 | 1026.6093 | 1026.5822 | 26.4 | 271 - 280 | 0 | --- | R.AGENVGVLLR.G                       |
| 1214.6581 | 1213.6508 | 1213.6230 | 22.9 | 305 - 314 | 0 | --- | K.FESEVYILSK.D                       |
| 1233.6701 | 1232.6629 | 1232.6091 | 43.6 | 326 - 334 | 0 | 15  | K.GYRPQFYFR.T                        |
| 1315.7305 | 1314.7232 | 1314.6060 | 89.1 | 254 - 264 | 1 | --- | K.STCTGVEMFRK.L                      |
| 1574.9723 | 1573.9650 | 1573.9304 | 22.0 | 290 - 304 | 0 | --- | R.GQVLAKPGTIKPHTK.F                  |
| 1728.9325 | 1727.9253 | 1727.8366 | 51.3 | 305 - 319 | 1 | --- | K.FESEVYILSKDEGGR.H                  |
| 1797.0350 | 1796.0277 | 1795.9325 | 53.1 | 359 - 374 | 0 | --- | K.MVVTLIHPIAMDDGLR.F + Oxidation (M) |
| 1803.9918 | 1802.9845 | 1802.8799 | 58.0 | 60 - 75   | 0 | --- | R.GITINTSHVEYDTPTR.H                 |
| 1965.1206 | 1964.1134 | 1963.9527 | 81.8 | 156 - 172 | 0 | 44  | R.ELLSQYDFPGDDTPIVR.G                |
| 2117.3190 | 2116.3117 | 2116.1568 | 73.2 | 206 - 224 | 0 | 28  | R.AIDKPFLLPIEDVFSISGR.G              |

**No match to:** 723.3202, 725.3349, 790.4618, 804.3175, 832.3504, 848.3077, 855.0634, 861.0816, 877.0593, 879.0642, 893.0384, 897.0395, 930.4819, 941.5245, 965.5432, 985.5503, 1001.5439, 1046.5846, 1179.6348, 1193.6685, 1219.5995, 1255.6486, 1269.6710, 1271.6285, 1277.6571, 1296.7322, 1320.6617, 1326.7448, 1348.7190, 1368.7612, 1450.7841, 1472.8880, 1475.8216, 1477.7796, 1494.8828, 1497.7996, 1509.8403, 1511.9038, 1527.8609, 1550.8947, 1598.9195, 1617.8806, 1631.8934, 1654.9031, 1707.9342, 1712.9042, 1733.0067, 1749.9856, 1755.9948, 1818.0212, 1866.0850, 1898.0605, 1915.0945, 1931.0593, 1947.0781, 1949.0662, 1967.1856, 1981.0932, 1988.1120, 1994.1406, 2005.1346, 2010.0916, 2139.2472, 2211.2249, 2229.2467, 2233.2426, 2271.2633, 2384.1999, 2399.2428, 2439.4144, 2451.4028, 2498.4046, 2615.4719, 2705.3847, 2808.6002, 3284.5981

**3. EFTUL ECOKI Mass: 43427 Score: 138 Expect: 5.3e-09 Matches: 11**

Elongation factor Tu 1 OS=Escherichia coli O1:K1 / APEC OX=405955 GN=tuf1 PE=3 SV=2

| Observed  | Mr(expt)  | Mr(calc)  | ppm  | Start     | End | Miss | Ions                                 | Peptide |
|-----------|-----------|-----------|------|-----------|-----|------|--------------------------------------|---------|
| 837.5072  | 836.4999  | 836.4868  | 15.7 | 118 - 124 | 0   | ---  | R.EHILLGR.Q                          |         |
| 1027.6166 | 1026.6093 | 1026.5822 | 26.4 | 271 - 280 | 0   | ---  | R.AGENVGVLLR.G                       |         |
| 1214.6581 | 1213.6508 | 1213.6230 | 22.9 | 305 - 314 | 0   | ---  | K.FESEVYILSK.D                       |         |
| 1233.6701 | 1232.6629 | 1232.6091 | 43.6 | 326 - 334 | 0   | 15   | K.GYRPQFYFR.T                        |         |
| 1315.7305 | 1314.7232 | 1314.6060 | 89.1 | 254 - 264 | 1   | ---  | K.STCTGVEMFRK.L                      |         |
| 1574.9723 | 1573.9650 | 1573.9304 | 22.0 | 290 - 304 | 0   | ---  | R.GQVLAKPGTIKPHTK.F                  |         |
| 1728.9325 | 1727.9253 | 1727.8366 | 51.3 | 305 - 319 | 1   | ---  | K.FESEVYILSKDEGGR.H                  |         |
| 1797.0350 | 1796.0277 | 1795.9325 | 53.1 | 359 - 374 | 0   | ---  | K.MVVTLIHPIAMDDGLR.F + Oxidation (M) |         |
| 1803.9918 | 1802.9845 | 1802.8799 | 58.0 | 60 - 75   | 0   | ---  | R.GITINTSHVEYDTPTR.H                 |         |
| 1965.1206 | 1964.1134 | 1963.9527 | 81.8 | 156 - 172 | 0   | 44   | R.ELLSQYDFPGDDTPIVR.G                |         |
| 2117.3190 | 2116.3117 | 2116.1568 | 73.2 | 206 - 224 | 0   | 28   | R.AIDKPFLLPIEDVFSISGR.G              |         |

**No match to:** 723.3202, 725.3349, 790.4618, 804.3175, 832.3504, 848.3077, 855.0634, 861.0816, 877.0593, 879.0642, 893.0384, 897.0395, 930.4819, 941.5245, 965.5432, 985.5503, 1001.5439, 1046.5846, 1179.6348, 1193.6685, 1219.5995, 1255.6486, 1269.6710, 1271.6285, 1277.6571, 1296.7322, 1320.6617, 1326.7448, 1348.7190, 1368.7612, 1450.7841, 1472.8880, 1475.8216, 1477.7796, 1494.8828, 1497.7996, 1509.8403, 1511.9038, 1527.8609, 1550.8947, 1598.9195, 1617.8806, 1631.8934, 1654.9031, 1707.9342, 1712.9042, 1733.0067, 1749.9856, 1755.9948, 1818.0212, 1866.0850, 1898.0605, 1915.0945, 1931.0593, 1947.0781, 1949.0662, 1967.1856, 1981.0932, 1988.1120, 1994.1406, 2005.1346, 2010.0916, 2139.2472, 2211.2249, 2229.2467, 2233.2426, 2271.2633, 2384.1999, 2399.2428, 2439.4144, 2451.4028, 2498.4046, 2615.4719, 2705.3847, 2808.6002, 3284.5981

**4. EFTUL ECOLS Mass: 43427 Score: 138 Expect: 5.3e-09 Matches: 11**

Elongation factor Tu 1 OS=Escherichia coli O6:K15:H31 (strain 536 / UPEC) OX=362663 GN=tuf1 PE=3 SV=1

| Observed  | Mr(expt)  | Mr(calc)  | ppm  | Start     | End | Miss | Ions                                 | Peptide |
|-----------|-----------|-----------|------|-----------|-----|------|--------------------------------------|---------|
| 837.5072  | 836.4999  | 836.4868  | 15.7 | 118 - 124 | 0   | ---  | R.EHILLGR.Q                          |         |
| 1027.6166 | 1026.6093 | 1026.5822 | 26.4 | 271 - 280 | 0   | ---  | R.AGENVGVLLR.G                       |         |
| 1214.6581 | 1213.6508 | 1213.6230 | 22.9 | 305 - 314 | 0   | ---  | K.FESEVYILSK.D                       |         |
| 1233.6701 | 1232.6629 | 1232.6091 | 43.6 | 326 - 334 | 0   | 15   | K.GYRPQFYFR.T                        |         |
| 1315.7305 | 1314.7232 | 1314.6060 | 89.1 | 254 - 264 | 1   | ---  | K.STCTGVEMFRK.L                      |         |
| 1574.9723 | 1573.9650 | 1573.9304 | 22.0 | 290 - 304 | 0   | ---  | R.GQVLAKPGTIKPHTK.F                  |         |
| 1728.9325 | 1727.9253 | 1727.8366 | 51.3 | 305 - 319 | 1   | ---  | K.FESEVYILSKDEGGR.H                  |         |
| 1797.0350 | 1796.0277 | 1795.9325 | 53.1 | 359 - 374 | 0   | ---  | K.MVVTLIHPIAMDDGLR.F + Oxidation (M) |         |
| 1803.9918 | 1802.9845 | 1802.8799 | 58.0 | 60 - 75   | 0   | ---  | R.GITINTSHVEYDTPTR.H                 |         |
| 1965.1206 | 1964.1134 | 1963.9527 | 81.8 | 156 - 172 | 0   | 44   | R.ELLSQYDFPGDDTPIVR.G                |         |
| 2117.3190 | 2116.3117 | 2116.1568 | 73.2 | 206 - 224 | 0   | 28   | R.AIDKPFLLPIEDVFSISGR.G              |         |

**No match to:** 723.3202, 725.3349, 790.4618, 804.3175, 832.3504, 848.3077, 855.0634, 861.0816, 877.0593, 879.0642, 893.0384, 897.0395, 930.4819, 941.5245, 965.5432, 985.5503, 1001.5439, 1046.5846, 1179.6348, 1193.6685, 1219.5995, 1255.6486, 1269.6710, 1271.6285, 1277.6571, 1296.7322, 1320.6617, 1326.7448, 1348.7190, 1368.7612, 1450.7841, 1472.8880, 1475.8216, 1477.7796, 1494.8828, 1497.7996, 1509.8403, 1511.9038, 1527.8609, 1550.8947, 1598.9195, 1617.8806, 1631.8934, 1654.9031, 1707.9342, 1712.9042, 1733.0067, 1749.9856, 1755.9948, 1818.0212, 1866.0850, 1898.0605, 1915.0945, 1931.0593, 1947.0781, 1949.0662, 1967.1856, 1981.0932, 1988.1120, 1994.1406, 2005.1346, 2010.0916, 2139.2472, 2211.2249, 2229.2467, 2233.2426, 2271.2633, 2384.1999, 2399.2428, 2439.4144, 2451.4028, 2498.4046, 2615.4719, 2705.3847, 2808.6002, 3284.5981

**5. EFTUL ECOLC Mass: 43427 Score: 138 Expect: 5.3e-09 Matches: 11**

Elongation factor Tu 1 OS=Escherichia coli (strain ATCC 8739 / DSM 1576 / Crooks) OX=481805 GN=tuf1 PE=3 SV=1

| Observed  | Mr(expt)  | Mr(calc)  | ppm  | Start     | End | Miss | Ions                                 | Peptide |
|-----------|-----------|-----------|------|-----------|-----|------|--------------------------------------|---------|
| 837.5072  | 836.4999  | 836.4868  | 15.7 | 118 - 124 | 0   | ---  | R.EHILLGR.Q                          |         |
| 1027.6166 | 1026.6093 | 1026.5822 | 26.4 | 271 - 280 | 0   | ---  | R.AGENVGVLLR.G                       |         |
| 1214.6581 | 1213.6508 | 1213.6230 | 22.9 | 305 - 314 | 0   | ---  | K.FESEVYILSK.D                       |         |
| 1233.6701 | 1232.6629 | 1232.6091 | 43.6 | 326 - 334 | 0   | 15   | K.GYRPQFYFR.T                        |         |
| 1315.7305 | 1314.7232 | 1314.6060 | 89.1 | 254 - 264 | 1   | ---  | K.STCTGVEMFRK.L                      |         |
| 1574.9723 | 1573.9650 | 1573.9304 | 22.0 | 290 - 304 | 0   | ---  | R.GQVLAKPGTIKPHTK.F                  |         |
| 1728.9325 | 1727.9253 | 1727.8366 | 51.3 | 305 - 319 | 1   | ---  | K.FESEVYILSKDEGGR.H                  |         |
| 1797.0350 | 1796.0277 | 1795.9325 | 53.1 | 359 - 374 | 0   | ---  | K.MVVTLIHPIAMDDGLR.F + Oxidation (M) |         |
| 1803.9918 | 1802.9845 | 1802.8799 | 58.0 | 60 - 75   | 0   | ---  | R.GITINTSHVEYDTPTR.H                 |         |
| 1965.1206 | 1964.1134 | 1963.9527 | 81.8 | 156 - 172 | 0   | 44   | R.ELLSQYDFPGDDTPIVR.G                |         |
| 2117.3190 | 2116.3117 | 2116.1568 | 73.2 | 206 - 224 | 0   | 28   | R.AIDKPFLLPIEDVFSISGR.G              |         |

**No match to:** 723.3202, 725.3349, 790.4618, 804.3175, 832.3504, 848.3077, 855.0634, 861.0816, 877.0593, 879.0642, 893.0384, 897.0395, 930.4819, 941.5245, 965.5432, 985.5503, 1001.5439, 1046.5846, 1179.6348, 1193.6685, 1219.5995, 1255.6486, 1269.6710, 1271.6285, 1277.6571, 1296.7322, 1320.6617, 1326.7448, 1348.7190, 1368.7612, 1450.7841, 1472.8880, 1475.8216, 1477.7796, 1494.8828, 1497.7996, 1509.8403, 1511.9038, 1527.8609, 1550.8947, 1598.9195, 1617.8806, 1631.8934, 1654.9031, 1707.9342, 1712.9042, 1733.0067, 1749.9856, 1755.9948, 1818.0212, 1866.0850, 1898.0605, 1915.0945, 1931.0593, 1947.0781, 1949.0662, 1967.1856, 1981.0932, 1988.1120, 1994.1406, 2005.1346, 2010.0916, 2139.2472, 2211.2249, 2229.2467, 2233.2426, 2271.2633, 2384.1999, 2399.2428, 2439.4144, 2451.4028, 2498.4046, 2615.4719, 2705.3847, 2808.6002, 3284.5981

**6. EFTUL ECOLI Mass: 43427 Score: 138 Expect: 5.3e-09 Matches: 11**

Elongation factor Tu 1 OS=Escherichia coli (strain K12) OX=83333 GN=tufA PE=1 SV=1

| Observed  | Mr(expt)  | Mr(calc)  | ppm  | Start     | End | Miss | Ions                | Peptide |
|-----------|-----------|-----------|------|-----------|-----|------|---------------------|---------|
| 837.5072  | 836.4999  | 836.4868  | 15.7 | 118 - 124 | 0   | ---  | R.EHILLGR.Q         |         |
| 1027.6166 | 1026.6093 | 1026.5822 | 26.4 | 271 - 280 | 0   | ---  | R.AGENVGVLLR.G      |         |
| 1214.6581 | 1213.6508 | 1213.6230 | 22.9 | 305 - 314 | 0   | ---  | K.FESEVYILSK.D      |         |
| 1233.6701 | 1232.6629 | 1232.6091 | 43.6 | 326 - 334 | 0   | 15   | K.GYRPQFYFR.T       |         |
| 1315.7305 | 1314.7232 | 1314.6060 | 89.1 | 254 - 264 | 1   | ---  | K.STCTGVEMFRK.L     |         |
| 1574.9723 | 1573.9650 | 1573.9304 | 22.0 | 290 - 304 | 0   | ---  | R.GQVLAKPGTIKPHTK.F |         |

|           |           |           |      |           |   |     |                                      |
|-----------|-----------|-----------|------|-----------|---|-----|--------------------------------------|
| 1728.9325 | 1727.9253 | 1727.8366 | 51.3 | 305 - 319 | 1 | --- | K.FESEVYILSKDEGGR.H                  |
| 1797.0350 | 1796.0277 | 1795.9325 | 53.1 | 359 - 374 | 0 | --- | K.MVVTLIHPIAMDDGLR.F + Oxidation (M) |
| 1803.9918 | 1802.9845 | 1802.8799 | 58.0 | 60 - 75   | 0 | --- | R.GITINTSHVEYDTPTR.H                 |
| 1965.1206 | 1964.1134 | 1963.9527 | 81.8 | 156 - 172 | 0 | 44  | R.ELLSQYDFPGDDTPIVR.G                |
| 2117.3190 | 2116.3117 | 2116.1568 | 73.2 | 206 - 224 | 0 | 28  | R.AIDKPFLLPIEDVFSISGR.G              |

**No match to:** 723.3202, 725.3349, 790.4618, 804.3175, 832.3504, 848.3077, 855.0634, 861.0816, 877.0593, 879.0642, 893.0384, 897.0395, 930.4819, 941.5245, 965.5432, 985.5503, 1001.5439, 1046.5846, 1179.6348, 1193.6685, 1219.5995, 1255.6486, 1269.6710, 1271.6285, 1277.6571, 1296.7322, 1320.6617, 1326.7448, 1348.7190, 1368.7612, 1450.7841, 1472.8880, 1475.8216, 1477.7796, 1494.8828, 1497.7996, 1509.8403, 1511.9038, 1527.8609, 1550.8947, 1598.9195, 1617.8806, 1631.8934, 1654.9031, 1707.9342, 1712.9042, 1733.0067, 1749.9856, 1755.9948, 1818.0212, 1866.0850, 1898.0605, 1915.0945, 1931.0593, 1947.0781, 1949.0662, 1967.1856, 1981.0932, 1988.1120, 1994.1406, 2005.1346, 2010.0916, 2139.2472, 2211.2249, 2229.2467, 2233.2426, 2271.2633, 2384.1999, 2399.2428, 2439.4144, 2451.4028, 2498.4046, 2615.4719, 2705.3847, 2808.6002, 3284.5981

7. [EFTU1 ECOUT](#) Mass: 43427 Score: 138 Expect: 5.3e-09 Matches: 11

Elongation factor Tu 1 OS=Escherichia coli (strain UTI89 / UPEC) OX=364106 GN=tuf1 PE=1 SV=1

| Observed  | Mr (expt) | Mr (calc) | ppm  | Start     | End | Miss | Ions | Peptide                              |
|-----------|-----------|-----------|------|-----------|-----|------|------|--------------------------------------|
| 837.5072  | 836.4999  | 836.4868  | 15.7 | 118 - 124 | 0   | ---  | ---  | R.EHILLGR.Q                          |
| 1027.6166 | 1026.6093 | 1026.5822 | 26.4 | 271 - 280 | 0   | ---  | ---  | R.AGENVGVLLR.G                       |
| 1214.6581 | 1213.6508 | 1213.6230 | 22.9 | 305 - 314 | 0   | ---  | ---  | K.FESEVYILSK.D                       |
| 1233.6701 | 1232.6629 | 1232.6091 | 43.6 | 326 - 334 | 0   | 15   | ---  | K.GYRPFYFR.T                         |
| 1315.7305 | 1314.7232 | 1314.6060 | 89.1 | 254 - 264 | 1   | ---  | ---  | K.STCTGVEMFRK.L                      |
| 1574.9723 | 1573.9650 | 1573.9304 | 22.0 | 290 - 304 | 0   | ---  | ---  | R.GQVLAKPGTIKPHTK.F                  |
| 1728.9325 | 1727.9253 | 1727.8366 | 51.3 | 305 - 319 | 1   | ---  | ---  | K.FESEVYILSKDEGGR.H                  |
| 1797.0350 | 1796.0277 | 1795.9325 | 53.1 | 359 - 374 | 0   | ---  | ---  | K.MVVTLIHPIAMDDGLR.F + Oxidation (M) |
| 1803.9918 | 1802.9845 | 1802.8799 | 58.0 | 60 - 75   | 0   | ---  | ---  | R.GITINTSHVEYDTPTR.H                 |
| 1965.1206 | 1964.1134 | 1963.9527 | 81.8 | 156 - 172 | 0   | 44   | ---  | R.ELLSQYDFPGDDTPIVR.G                |
| 2117.3190 | 2116.3117 | 2116.1568 | 73.2 | 206 - 224 | 0   | 28   | ---  | R.AIDKPFLLPIEDVFSISGR.G              |

**No match to:** 723.3202, 725.3349, 790.4618, 804.3175, 832.3504, 848.3077, 855.0634, 861.0816, 877.0593, 879.0642, 893.0384, 897.0395, 930.4819, 941.5245, 965.5432, 985.5503, 1001.5439, 1046.5846, 1179.6348, 1193.6685, 1219.5995, 1255.6486, 1269.6710, 1271.6285, 1277.6571, 1296.7322, 1320.6617, 1326.7448, 1348.7190, 1368.7612, 1450.7841, 1472.8880, 1475.8216, 1477.7796, 1494.8828, 1497.7996, 1509.8403, 1511.9038, 1527.8609, 1550.8947, 1598.9195, 1617.8806, 1631.8934, 1654.9031, 1707.9342, 1712.9042, 1733.0067, 1749.9856, 1755.9948, 1818.0212, 1866.0850, 1898.0605, 1915.0945, 1931.0593, 1947.0781, 1949.0662, 1967.1856, 1981.0932, 1988.1120, 1994.1406, 2005.1346, 2010.0916, 2139.2472, 2211.2249, 2229.2467, 2233.2426, 2271.2633, 2384.1999, 2399.2428, 2439.4144, 2451.4028, 2498.4046, 2615.4719, 2705.3847, 2808.6002, 3284.5981

8. [EFTU1 SHIF6](#) Mass: 43426 Score: 138 Expect: 5.3e-09 Matches: 11

Elongation factor Tu 1 OS=Shigella flexneri serotype 5b (strain 8401) OX=373384 GN=tuf1 PE=3 SV=1

| Observed  | Mr (expt) | Mr (calc) | ppm  | Start     | End | Miss | Ions | Peptide                              |
|-----------|-----------|-----------|------|-----------|-----|------|------|--------------------------------------|
| 837.5072  | 836.4999  | 836.4868  | 15.7 | 118 - 124 | 0   | ---  | ---  | R.EHILLGR.Q                          |
| 1027.6166 | 1026.6093 | 1026.5822 | 26.4 | 271 - 280 | 0   | ---  | ---  | R.AGENVGVLLR.G                       |
| 1214.6581 | 1213.6508 | 1213.6230 | 22.9 | 305 - 314 | 0   | ---  | ---  | K.FESEVYILSK.D                       |
| 1233.6701 | 1232.6629 | 1232.6091 | 43.6 | 326 - 334 | 0   | 15   | ---  | K.GYRPFYFR.T                         |
| 1315.7305 | 1314.7232 | 1314.6060 | 89.1 | 254 - 264 | 1   | ---  | ---  | K.STCTGVEMFRK.L                      |
| 1574.9723 | 1573.9650 | 1573.9304 | 22.0 | 290 - 304 | 0   | ---  | ---  | R.GQVLAKPGTIKPHTK.F                  |
| 1728.9325 | 1727.9253 | 1727.8366 | 51.3 | 305 - 319 | 1   | ---  | ---  | K.FESEVYILSKDEGGR.H                  |
| 1797.0350 | 1796.0277 | 1795.9325 | 53.1 | 359 - 374 | 0   | ---  | ---  | K.MVVTLIHPIAMDDGLR.F + Oxidation (M) |
| 1803.9918 | 1802.9845 | 1802.8799 | 58.0 | 60 - 75   | 0   | ---  | ---  | R.GITINTSHVEYDTPTR.H                 |
| 1965.1206 | 1964.1134 | 1963.9527 | 81.8 | 156 - 172 | 0   | 44   | ---  | R.ELLSQYDFPGDDTPIVR.G                |
| 2117.3190 | 2116.3117 | 2116.1568 | 73.2 | 206 - 224 | 0   | 28   | ---  | R.AIDKPFLLPIEDVFSISGR.G              |

**No match to:** 723.3202, 725.3349, 790.4618, 804.3175, 832.3504, 848.3077, 855.0634, 861.0816, 877.0593, 879.0642, 893.0384, 897.0395, 930.4819, 941.5245, 965.5432, 985.5503, 1001.5439, 1046.5846, 1179.6348, 1193.6685, 1219.5995, 1255.6486, 1269.6710, 1271.6285, 1277.6571, 1296.7322, 1320.6617, 1326.7448, 1348.7190, 1368.7612, 1450.7841, 1472.8880, 1475.8216, 1477.7796, 1494.8828, 1497.7996, 1509.8403, 1511.9038, 1527.8609, 1550.8947, 1598.9195, 1617.8806, 1631.8934, 1654.9031, 1707.9342, 1712.9042, 1733.0067, 1749.9856, 1755.9948, 1818.0212, 1866.0850, 1898.0605, 1915.0945, 1931.0593, 1947.0781, 1949.0662, 1967.1856, 1981.0932, 1988.1120, 1994.1406, 2005.1346, 2010.0916, 2139.2472, 2211.2249, 2229.2467, 2233.2426, 2271.2633, 2384.1999, 2399.2428, 2439.4144, 2451.4028, 2498.4046, 2615.4719, 2705.3847, 2808.6002, 3284.5981

9. [EFTU1 SHISS](#) Mass: 43427 Score: 138 Expect: 5.3e-09 Matches: 11

Elongation factor Tu 1 OS=Shigella sonnei (strain Ss046) OX=300269 GN=tuf1 PE=3 SV=1

| Observed  | Mr (expt) | Mr (calc) | ppm  | Start     | End | Miss | Ions | Peptide                              |
|-----------|-----------|-----------|------|-----------|-----|------|------|--------------------------------------|
| 837.5072  | 836.4999  | 836.4868  | 15.7 | 118 - 124 | 0   | ---  | ---  | R.EHILLGR.Q                          |
| 1027.6166 | 1026.6093 | 1026.5822 | 26.4 | 271 - 280 | 0   | ---  | ---  | R.AGENVGVLLR.G                       |
| 1214.6581 | 1213.6508 | 1213.6230 | 22.9 | 305 - 314 | 0   | ---  | ---  | K.FESEVYILSK.D                       |
| 1233.6701 | 1232.6629 | 1232.6091 | 43.6 | 326 - 334 | 0   | 15   | ---  | K.GYRPFYFR.T                         |
| 1315.7305 | 1314.7232 | 1314.6060 | 89.1 | 254 - 264 | 1   | ---  | ---  | K.STCTGVEMFRK.L                      |
| 1574.9723 | 1573.9650 | 1573.9304 | 22.0 | 290 - 304 | 0   | ---  | ---  | R.GQVLAKPGTIKPHTK.F                  |
| 1728.9325 | 1727.9253 | 1727.8366 | 51.3 | 305 - 319 | 1   | ---  | ---  | K.FESEVYILSKDEGGR.H                  |
| 1797.0350 | 1796.0277 | 1795.9325 | 53.1 | 359 - 374 | 0   | ---  | ---  | K.MVVTLIHPIAMDDGLR.F + Oxidation (M) |
| 1803.9918 | 1802.9845 | 1802.8799 | 58.0 | 60 - 75   | 0   | ---  | ---  | R.GITINTSHVEYDTPTR.H                 |
| 1965.1206 | 1964.1134 | 1963.9527 | 81.8 | 156 - 172 | 0   | 44   | ---  | R.ELLSQYDFPGDDTPIVR.G                |
| 2117.3190 | 2116.3117 | 2116.1568 | 73.2 | 206 - 224 | 0   | 28   | ---  | R.AIDKPFLLPIEDVFSISGR.G              |

**No match to:** 723.3202, 725.3349, 790.4618, 804.3175, 832.3504, 848.3077, 855.0634, 861.0816, 877.0593, 879.0642, 893.0384, 897.0395, 930.4819, 941.5245, 965.5432, 985.5503, 1001.5439, 1046.5846, 1179.6348, 1193.6685, 1219.5995, 1255.6486, 1269.6710, 1271.6285, 1277.6571, 1296.7322, 1320.6617, 1326.7448, 1348.7190, 1368.7612, 1450.7841, 1472.8880, 1475.8216, 1477.7796, 1494.8828, 1497.7996, 1509.8403, 1511.9038, 1527.8609, 1550.8947, 1598.9195, 1617.8806, 1631.8934, 1654.9031, 1707.9342, 1712.9042, 1733.0067, 1749.9856, 1755.9948, 1818.0212, 1866.0850, 1898.0605, 1915.0945, 1931.0593, 1947.0781, 1949.0662, 1967.1856, 1981.0932, 1988.1120, 1994.1406, 2005.1346, 2010.0916, 2139.2472, 2211.2249, 2229.2467, 2233.2426, 2271.2633, 2384.1999, 2399.2428, 2439.4144, 2451.4028, 2498.4046, 2615.4719, 2705.3847, 2808.6002, 3284.5981

10. [EFTU2 ECO24](#) Mass: 43456 Score: 138 Expect: 5.3e-09 Matches: 11

Elongation factor Tu 2 OS=Escherichia coli O139:H28 (strain E24377A / ETEC) OX=331111 GN=tuf2 PE=3 SV=1

| Observed  | Mr (expt) | Mr (calc) | ppm  | Start     | End | Miss | Ions | Peptide                              |
|-----------|-----------|-----------|------|-----------|-----|------|------|--------------------------------------|
| 837.5072  | 836.4999  | 836.4868  | 15.7 | 118 - 124 | 0   | ---  | ---  | R.EHILLGR.Q                          |
| 1027.6166 | 1026.6093 | 1026.5822 | 26.4 | 271 - 280 | 0   | ---  | ---  | R.AGENVGVLLR.G                       |
| 1214.6581 | 1213.6508 | 1213.6230 | 22.9 | 305 - 314 | 0   | ---  | ---  | K.FESEVYILSK.D                       |
| 1233.6701 | 1232.6629 | 1232.6091 | 43.6 | 326 - 334 | 0   | 15   | ---  | K.GYRPFYFR.T                         |
| 1315.7305 | 1314.7232 | 1314.6060 | 89.1 | 254 - 264 | 1   | ---  | ---  | K.STCTGVEMFRK.L                      |
| 1574.9723 | 1573.9650 | 1573.9304 | 22.0 | 290 - 304 | 0   | ---  | ---  | R.GQVLAKPGTIKPHTK.F                  |
| 1728.9325 | 1727.9253 | 1727.8366 | 51.3 | 305 - 319 | 1   | ---  | ---  | K.FESEVYILSKDEGGR.H                  |
| 1797.0350 | 1796.0277 | 1795.9325 | 53.1 | 359 - 374 | 0   | ---  | ---  | K.MVVTLIHPIAMDDGLR.F + Oxidation (M) |
| 1803.9918 | 1802.9845 | 1802.8799 | 58.0 | 60 - 75   | 0   | ---  | ---  | R.GITINTSHVEYDTPTR.H                 |
| 1965.1206 | 1964.1134 | 1963.9527 | 81.8 | 156 - 172 | 0   | 44   | ---  | R.ELLSQYDFPGDDTPIVR.G                |
| 2117.3190 | 2116.3117 | 2116.1568 | 73.2 | 206 - 224 | 0   | 28   | ---  | R.AIDKPFLLPIEDVFSISGR.G              |

**No match to:** 723.3202, 725.3349, 790.4618, 804.3175, 832.3504, 848.3077, 855.0634, 861.0816, 877.0593, 879.0642, 893.0384, 897.0395, 930.4819, 941.5245, 965.5432, 985.5503, 1001.5439, 1046.5846, 1179.6348, 1193.6685, 1219.5995, 1255.6486, 1269.6710, 1271.6285, 1277.6571, 1296.7322, 1320.6617, 1326.7448, 1348.7190, 1368.7612, 1450.7841, 1472.8880, 1475.8216, 1477.7796, 1494.8828, 1497.7996, 1509.8403, 1511.9038, 1527.8609, 1550.8947, 1598.9195, 1617.8806, 1631.8934, 1654.9031, 1707.9342, 1712.9042, 1733.0067, 1749.9856, 1755.9948, 1818.0212, 1866.0850, 1898.0605, 1915.0945, 1931.0593, 1947.0781, 1949.0662, 1967.1856, 1981.0932, 1988.1120, 1994.1406, 2005.1346, 2010.0916, 2139.2472, 2211.2249, 2229.2467, 2233.2426, 2271.2633, 2384.1999, 2399.2428, 2439.4144, 2451.4028, 2498.4046, 2615.4719, 2705.3847, 2808.6002, 3284.5981

11. [EFTU2\\_ECOHS](#) **Mass:** 43457 **Score:** 138 **Expect:** 5.3e-09 **Matches:** 11  
 Elongation factor Tu 2 OS=Escherichia coli O9:H4 (strain HS) OX=331112 GN=tuf2 PE=3 SV=1
- | Observed  | Mr (expt) | Mr (calc) | ppm  | Start | End | Miss | Ions | Peptide                            |
|-----------|-----------|-----------|------|-------|-----|------|------|------------------------------------|
| 837.5072  | 836.4999  | 836.4868  | 15.7 | 118   | 124 | 0    | ---  | R.EHILLGR.Q                        |
| 1027.6166 | 1026.6093 | 1026.5822 | 26.4 | 271   | 280 | 0    | ---  | R.AGENVGVLLR.G                     |
| 1214.6581 | 1213.6508 | 1213.6230 | 22.9 | 305   | 314 | 0    | ---  | K.FESEVYILSK.D                     |
| 1233.6701 | 1232.6629 | 1232.6091 | 43.6 | 326   | 334 | 0    | 15   | K.GYRPFYFR.T                       |
| 1315.7305 | 1314.7232 | 1314.6060 | 89.1 | 254   | 264 | 1    | ---  | K.STCTGVEMFRK.L                    |
| 1574.9723 | 1573.9650 | 1573.9304 | 22.0 | 290   | 304 | 0    | ---  | R.GQVLAKPGTIKPHTK.F                |
| 1728.9325 | 1727.9253 | 1727.8366 | 51.3 | 305   | 319 | 1    | ---  | K.FESEVYILSKDEGGR.H                |
| 1797.0350 | 1796.0277 | 1795.9325 | 53.1 | 359   | 374 | 0    | ---  | K.MVVTLIHPAMDGLR.F + Oxidation (M) |
| 1803.9918 | 1802.9845 | 1802.8799 | 58.0 | 60    | 75  | 0    | ---  | R.GITINTSHVEYDTPTR.H               |
| 1965.1206 | 1964.1134 | 1963.9527 | 81.8 | 156   | 172 | 0    | 44   | R.ELLSQYDFPGDDTPIVR.G              |
| 2117.3190 | 2116.3117 | 2116.1568 | 73.2 | 206   | 224 | 0    | 28   | R.AIDKPFLLPIEDVFSISGR.G            |
- No match to:** 723.3202, 725.3349, 790.4618, 804.3175, 832.3504, 848.3077, 855.0634, 861.0816, 877.0593, 879.0642, 893.0384, 897.0395, 930.4819, 941.5245, 965.5432, 985.5503, 1001.5439, 1046.5846, 1179.6348, 1193.6685, 1219.5995, 1255.6486, 1269.6710, 1271.6285, 1277.6571, 1296.7322, 1320.6617, 1326.7448, 1348.7190, 1368.7612, 1450.7841, 1472.8880, 1475.8216, 1477.7796, 1494.8828, 1497.7996, 1509.8403, 1511.9038, 1527.8609, 1550.8947, 1598.9195, 1617.8806, 1631.8934, 1654.9031, 1707.9342, 1712.9042, 1733.0067, 1749.9856, 1755.9948, 1818.0212, 1866.0850, 1898.0605, 1915.0945, 1931.0593, 1947.0781, 1949.0662, 1967.1856, 1981.0932, 1988.1120, 1994.1406, 2005.1346, 2010.0916, 2139.2472, 2211.2249, 2229.2467, 2233.2426, 2271.2633, 2384.1999, 2399.2428, 2439.4144, 2451.4028, 2498.4046, 2615.4719, 2705.3847, 2808.6002, 3284.5981
12. [EFTU2\\_ECOKI](#) **Mass:** 43457 **Score:** 138 **Expect:** 5.3e-09 **Matches:** 11  
 Elongation factor Tu 2 OS=Escherichia coli O1:K1 / APEC OX=405955 GN=tuf2 PE=3 SV=1
- | Observed  | Mr (expt) | Mr (calc) | ppm  | Start | End | Miss | Ions | Peptide                            |
|-----------|-----------|-----------|------|-------|-----|------|------|------------------------------------|
| 837.5072  | 836.4999  | 836.4868  | 15.7 | 118   | 124 | 0    | ---  | R.EHILLGR.Q                        |
| 1027.6166 | 1026.6093 | 1026.5822 | 26.4 | 271   | 280 | 0    | ---  | R.AGENVGVLLR.G                     |
| 1214.6581 | 1213.6508 | 1213.6230 | 22.9 | 305   | 314 | 0    | ---  | K.FESEVYILSK.D                     |
| 1233.6701 | 1232.6629 | 1232.6091 | 43.6 | 326   | 334 | 0    | 15   | K.GYRPFYFR.T                       |
| 1315.7305 | 1314.7232 | 1314.6060 | 89.1 | 254   | 264 | 1    | ---  | K.STCTGVEMFRK.L                    |
| 1574.9723 | 1573.9650 | 1573.9304 | 22.0 | 290   | 304 | 0    | ---  | R.GQVLAKPGTIKPHTK.F                |
| 1728.9325 | 1727.9253 | 1727.8366 | 51.3 | 305   | 319 | 1    | ---  | K.FESEVYILSKDEGGR.H                |
| 1797.0350 | 1796.0277 | 1795.9325 | 53.1 | 359   | 374 | 0    | ---  | K.MVVTLIHPAMDGLR.F + Oxidation (M) |
| 1803.9918 | 1802.9845 | 1802.8799 | 58.0 | 60    | 75  | 0    | ---  | R.GITINTSHVEYDTPTR.H               |
| 1965.1206 | 1964.1134 | 1963.9527 | 81.8 | 156   | 172 | 0    | 44   | R.ELLSQYDFPGDDTPIVR.G              |
| 2117.3190 | 2116.3117 | 2116.1568 | 73.2 | 206   | 224 | 0    | 28   | R.AIDKPFLLPIEDVFSISGR.G            |
- No match to:** 723.3202, 725.3349, 790.4618, 804.3175, 832.3504, 848.3077, 855.0634, 861.0816, 877.0593, 879.0642, 893.0384, 897.0395, 930.4819, 941.5245, 965.5432, 985.5503, 1001.5439, 1046.5846, 1179.6348, 1193.6685, 1219.5995, 1255.6486, 1269.6710, 1271.6285, 1277.6571, 1296.7322, 1320.6617, 1326.7448, 1348.7190, 1368.7612, 1450.7841, 1472.8880, 1475.8216, 1477.7796, 1494.8828, 1497.7996, 1509.8403, 1511.9038, 1527.8609, 1550.8947, 1598.9195, 1617.8806, 1631.8934, 1654.9031, 1707.9342, 1712.9042, 1733.0067, 1749.9856, 1755.9948, 1818.0212, 1866.0850, 1898.0605, 1915.0945, 1931.0593, 1947.0781, 1949.0662, 1967.1856, 1981.0932, 1988.1120, 1994.1406, 2005.1346, 2010.0916, 2139.2472, 2211.2249, 2229.2467, 2233.2426, 2271.2633, 2384.1999, 2399.2428, 2439.4144, 2451.4028, 2498.4046, 2615.4719, 2705.3847, 2808.6002, 3284.5981
13. [EFTU2\\_ECOLS](#) **Mass:** 43457 **Score:** 138 **Expect:** 5.3e-09 **Matches:** 11  
 Elongation factor Tu 2 OS=Escherichia coli O6:K15:H31 (strain 536 / UPEC) OX=362663 GN=tuf2 PE=3 SV=1
- | Observed  | Mr (expt) | Mr (calc) | ppm  | Start | End | Miss | Ions | Peptide                            |
|-----------|-----------|-----------|------|-------|-----|------|------|------------------------------------|
| 837.5072  | 836.4999  | 836.4868  | 15.7 | 118   | 124 | 0    | ---  | R.EHILLGR.Q                        |
| 1027.6166 | 1026.6093 | 1026.5822 | 26.4 | 271   | 280 | 0    | ---  | R.AGENVGVLLR.G                     |
| 1214.6581 | 1213.6508 | 1213.6230 | 22.9 | 305   | 314 | 0    | ---  | K.FESEVYILSK.D                     |
| 1233.6701 | 1232.6629 | 1232.6091 | 43.6 | 326   | 334 | 0    | 15   | K.GYRPFYFR.T                       |
| 1315.7305 | 1314.7232 | 1314.6060 | 89.1 | 254   | 264 | 1    | ---  | K.STCTGVEMFRK.L                    |
| 1574.9723 | 1573.9650 | 1573.9304 | 22.0 | 290   | 304 | 0    | ---  | R.GQVLAKPGTIKPHTK.F                |
| 1728.9325 | 1727.9253 | 1727.8366 | 51.3 | 305   | 319 | 1    | ---  | K.FESEVYILSKDEGGR.H                |
| 1797.0350 | 1796.0277 | 1795.9325 | 53.1 | 359   | 374 | 0    | ---  | K.MVVTLIHPAMDGLR.F + Oxidation (M) |
| 1803.9918 | 1802.9845 | 1802.8799 | 58.0 | 60    | 75  | 0    | ---  | R.GITINTSHVEYDTPTR.H               |
| 1965.1206 | 1964.1134 | 1963.9527 | 81.8 | 156   | 172 | 0    | 44   | R.ELLSQYDFPGDDTPIVR.G              |
| 2117.3190 | 2116.3117 | 2116.1568 | 73.2 | 206   | 224 | 0    | 28   | R.AIDKPFLLPIEDVFSISGR.G            |
- No match to:** 723.3202, 725.3349, 790.4618, 804.3175, 832.3504, 848.3077, 855.0634, 861.0816, 877.0593, 879.0642, 893.0384, 897.0395, 930.4819, 941.5245, 965.5432, 985.5503, 1001.5439, 1046.5846, 1179.6348, 1193.6685, 1219.5995, 1255.6486, 1269.6710, 1271.6285, 1277.6571, 1296.7322, 1320.6617, 1326.7448, 1348.7190, 1368.7612, 1450.7841, 1472.8880, 1475.8216, 1477.7796, 1494.8828, 1497.7996, 1509.8403, 1511.9038, 1527.8609, 1550.8947, 1598.9195, 1617.8806, 1631.8934, 1654.9031, 1707.9342, 1712.9042, 1733.0067, 1749.9856, 1755.9948, 1818.0212, 1866.0850, 1898.0605, 1915.0945, 1931.0593, 1947.0781, 1949.0662, 1967.1856, 1981.0932, 1988.1120, 1994.1406, 2005.1346, 2010.0916, 2139.2472, 2211.2249, 2229.2467, 2233.2426, 2271.2633, 2384.1999, 2399.2428, 2439.4144, 2451.4028, 2498.4046, 2615.4719, 2705.3847, 2808.6002, 3284.5981
14. [EFTU2\\_ECOLC](#) **Mass:** 43457 **Score:** 138 **Expect:** 5.3e-09 **Matches:** 11  
 Elongation factor Tu 2 OS=Escherichia coli (strain ATCC 8739 / DSM 1576 / Crooks) OX=481805 GN=tuf2 PE=3 SV=1
- | Observed  | Mr (expt) | Mr (calc) | ppm  | Start | End | Miss | Ions | Peptide                            |
|-----------|-----------|-----------|------|-------|-----|------|------|------------------------------------|
| 837.5072  | 836.4999  | 836.4868  | 15.7 | 118   | 124 | 0    | ---  | R.EHILLGR.Q                        |
| 1027.6166 | 1026.6093 | 1026.5822 | 26.4 | 271   | 280 | 0    | ---  | R.AGENVGVLLR.G                     |
| 1214.6581 | 1213.6508 | 1213.6230 | 22.9 | 305   | 314 | 0    | ---  | K.FESEVYILSK.D                     |
| 1233.6701 | 1232.6629 | 1232.6091 | 43.6 | 326   | 334 | 0    | 15   | K.GYRPFYFR.T                       |
| 1315.7305 | 1314.7232 | 1314.6060 | 89.1 | 254   | 264 | 1    | ---  | K.STCTGVEMFRK.L                    |
| 1574.9723 | 1573.9650 | 1573.9304 | 22.0 | 290   | 304 | 0    | ---  | R.GQVLAKPGTIKPHTK.F                |
| 1728.9325 | 1727.9253 | 1727.8366 | 51.3 | 305   | 319 | 1    | ---  | K.FESEVYILSKDEGGR.H                |
| 1797.0350 | 1796.0277 | 1795.9325 | 53.1 | 359   | 374 | 0    | ---  | K.MVVTLIHPAMDGLR.F + Oxidation (M) |
| 1803.9918 | 1802.9845 | 1802.8799 | 58.0 | 60    | 75  | 0    | ---  | R.GITINTSHVEYDTPTR.H               |
| 1965.1206 | 1964.1134 | 1963.9527 | 81.8 | 156   | 172 | 0    | 44   | R.ELLSQYDFPGDDTPIVR.G              |
| 2117.3190 | 2116.3117 | 2116.1568 | 73.2 | 206   | 224 | 0    | 28   | R.AIDKPFLLPIEDVFSISGR.G            |
- No match to:** 723.3202, 725.3349, 790.4618, 804.3175, 832.3504, 848.3077, 855.0634, 861.0816, 877.0593, 879.0642, 893.0384, 897.0395, 930.4819, 941.5245, 965.5432, 985.5503, 1001.5439, 1046.5846, 1179.6348, 1193.6685, 1219.5995, 1255.6486, 1269.6710, 1271.6285, 1277.6571, 1296.7322, 1320.6617, 1326.7448, 1348.7190, 1368.7612, 1450.7841, 1472.8880, 1475.8216, 1477.7796, 1494.8828, 1497.7996, 1509.8403, 1511.9038, 1527.8609, 1550.8947, 1598.9195, 1617.8806, 1631.8934, 1654.9031, 1707.9342, 1712.9042, 1733.0067, 1749.9856, 1755.9948, 1818.0212, 1866.0850, 1898.0605, 1915.0945, 1931.0593, 1947.0781, 1949.0662, 1967.1856, 1981.0932, 1988.1120, 1994.1406, 2005.1346, 2010.0916, 2139.2472, 2211.2249, 2229.2467, 2233.2426, 2271.2633, 2384.1999, 2399.2428, 2439.4144, 2451.4028, 2498.4046, 2615.4719, 2705.3847, 2808.6002, 3284.5981

15. [EFTU2\\_ECOLI](#) Mass: 43457 Score: 138 Expect: 5.3e-09 Matches: 11

Elongation factor Tu 2 OS=Escherichia coli (strain K12) OX=83333 GN=tufB PE=1 SV=1

| Observed  | Mr (expt) | Mr (calc) | ppm  | Start | End   | Miss | Ions | Peptide                            |
|-----------|-----------|-----------|------|-------|-------|------|------|------------------------------------|
| 837.5072  | 836.4999  | 836.4868  | 15.7 | 118   | - 124 | 0    | ---  | R.EHILLGR.Q                        |
| 1027.6166 | 1026.6093 | 1026.5822 | 26.4 | 271   | - 280 | 0    | ---  | R.AGENVGVLLR.G                     |
| 1214.6581 | 1213.6508 | 1213.6230 | 22.9 | 305   | - 314 | 0    | ---  | K.FESEVYILSK.D                     |
| 1233.6701 | 1232.6629 | 1232.6091 | 43.6 | 326   | - 334 | 0    | 15   | K.GYRPFYFR.T                       |
| 1315.7305 | 1314.7232 | 1314.6060 | 89.1 | 254   | - 264 | 1    | ---  | K.STCTGVEMFRK.L                    |
| 1574.9723 | 1573.9650 | 1573.9304 | 22.0 | 290   | - 304 | 0    | ---  | R.GQVLAKPGTIKPHTK.F                |
| 1728.9325 | 1727.9253 | 1727.8366 | 51.3 | 305   | - 319 | 1    | ---  | K.FESEVYILSKDEGGR.H                |
| 1797.0350 | 1796.0277 | 1795.9325 | 53.1 | 359   | - 374 | 0    | ---  | K.MVVTLIHPAMDGLR.F + Oxidation (M) |
| 1803.9918 | 1802.9845 | 1802.8799 | 58.0 | 60    | - 75  | 0    | ---  | R.GITINTSHVEYDTPTR.H               |
| 1965.1206 | 1964.1134 | 1963.9527 | 81.8 | 156   | - 172 | 0    | 44   | R.ELLSQYDFPGDDTPIVR.G              |
| 2117.3190 | 2116.3117 | 2116.1568 | 73.2 | 206   | - 224 | 0    | 28   | R.AIDKPFLLPIEDVFSISGR.G            |

No match to: 723.3202, 725.3349, 790.4618, 804.3175, 832.3504, 848.3077, 855.0634, 861.0816, 877.0593, 879.0642, 893.0384, 897.0395, 930.4819, 941.5245, 965.5432, 985.5503, 1001.5439, 1046.5846, 1179.6348, 1193.6685, 1219.5995, 1255.6486, 1269.6710, 1271.6285, 1277.6571, 1296.7322, 1320.6617, 1326.7448, 1348.7190, 1368.7612, 1450.7841, 1472.8880, 1475.8216, 1477.7796, 1494.8828, 1497.7996, 1509.8403, 1511.9038, 1527.8609, 1550.8947, 1598.9195, 1617.8806, 1631.8934, 1654.9031, 1707.9342, 1712.9042, 1733.0067, 1749.9856, 1755.9948, 1818.0212, 1866.0850, 1898.0605, 1915.0945, 1931.0593, 1947.0781, 1949.0662, 1967.1856, 1981.0932, 1988.1120, 1994.1406, 2005.1346, 2010.0916, 2139.2472, 2211.2249, 2229.2467, 2233.2426, 2271.2633, 2384.1999, 2399.2428, 2439.4144, 2451.4028, 2498.4046, 2615.4719, 2705.3847, 2808.6002, 3284.5981

16. [EFTU2\\_ECOUT](#) Mass: 43457 Score: 138 Expect: 5.3e-09 Matches: 11

Elongation factor Tu 2 OS=Escherichia coli (strain UTI89 / UPEC) OX=364106 GN=tuf2 PE=3 SV=2

| Observed  | Mr (expt) | Mr (calc) | ppm  | Start | End   | Miss | Ions | Peptide                            |
|-----------|-----------|-----------|------|-------|-------|------|------|------------------------------------|
| 837.5072  | 836.4999  | 836.4868  | 15.7 | 118   | - 124 | 0    | ---  | R.EHILLGR.Q                        |
| 1027.6166 | 1026.6093 | 1026.5822 | 26.4 | 271   | - 280 | 0    | ---  | R.AGENVGVLLR.G                     |
| 1214.6581 | 1213.6508 | 1213.6230 | 22.9 | 305   | - 314 | 0    | ---  | K.FESEVYILSK.D                     |
| 1233.6701 | 1232.6629 | 1232.6091 | 43.6 | 326   | - 334 | 0    | 15   | K.GYRPFYFR.T                       |
| 1315.7305 | 1314.7232 | 1314.6060 | 89.1 | 254   | - 264 | 1    | ---  | K.STCTGVEMFRK.L                    |
| 1574.9723 | 1573.9650 | 1573.9304 | 22.0 | 290   | - 304 | 0    | ---  | R.GQVLAKPGTIKPHTK.F                |
| 1728.9325 | 1727.9253 | 1727.8366 | 51.3 | 305   | - 319 | 1    | ---  | K.FESEVYILSKDEGGR.H                |
| 1797.0350 | 1796.0277 | 1795.9325 | 53.1 | 359   | - 374 | 0    | ---  | K.MVVTLIHPAMDGLR.F + Oxidation (M) |
| 1803.9918 | 1802.9845 | 1802.8799 | 58.0 | 60    | - 75  | 0    | ---  | R.GITINTSHVEYDTPTR.H               |
| 1965.1206 | 1964.1134 | 1963.9527 | 81.8 | 156   | - 172 | 0    | 44   | R.ELLSQYDFPGDDTPIVR.G              |
| 2117.3190 | 2116.3117 | 2116.1568 | 73.2 | 206   | - 224 | 0    | 28   | R.AIDKPFLLPIEDVFSISGR.G            |

No match to: 723.3202, 725.3349, 790.4618, 804.3175, 832.3504, 848.3077, 855.0634, 861.0816, 877.0593, 879.0642, 893.0384, 897.0395, 930.4819, 941.5245, 965.5432, 985.5503, 1001.5439, 1046.5846, 1179.6348, 1193.6685, 1219.5995, 1255.6486, 1269.6710, 1271.6285, 1277.6571, 1296.7322, 1320.6617, 1326.7448, 1348.7190, 1368.7612, 1450.7841, 1472.8880, 1475.8216, 1477.7796, 1494.8828, 1497.7996, 1509.8403, 1511.9038, 1527.8609, 1550.8947, 1598.9195, 1617.8806, 1631.8934, 1654.9031, 1707.9342, 1712.9042, 1733.0067, 1749.9856, 1755.9948, 1818.0212, 1866.0850, 1898.0605, 1915.0945, 1931.0593, 1947.0781, 1949.0662, 1967.1856, 1981.0932, 1988.1120, 1994.1406, 2005.1346, 2010.0916, 2139.2472, 2211.2249, 2229.2467, 2233.2426, 2271.2633, 2384.1999, 2399.2428, 2439.4144, 2451.4028, 2498.4046, 2615.4719, 2705.3847, 2808.6002, 3284.5981

17. [EFTU2\\_SHIF8](#) Mass: 43457 Score: 138 Expect: 5.3e-09 Matches: 11

Elongation factor Tu 2 OS=Shigella flexneri serotype 5b (strain 8401) OX=373384 GN=tuf2 PE=3 SV=1

| Observed  | Mr (expt) | Mr (calc) | ppm  | Start | End   | Miss | Ions | Peptide                            |
|-----------|-----------|-----------|------|-------|-------|------|------|------------------------------------|
| 837.5072  | 836.4999  | 836.4868  | 15.7 | 118   | - 124 | 0    | ---  | R.EHILLGR.Q                        |
| 1027.6166 | 1026.6093 | 1026.5822 | 26.4 | 271   | - 280 | 0    | ---  | R.AGENVGVLLR.G                     |
| 1214.6581 | 1213.6508 | 1213.6230 | 22.9 | 305   | - 314 | 0    | ---  | K.FESEVYILSK.D                     |
| 1233.6701 | 1232.6629 | 1232.6091 | 43.6 | 326   | - 334 | 0    | 15   | K.GYRPFYFR.T                       |
| 1315.7305 | 1314.7232 | 1314.6060 | 89.1 | 254   | - 264 | 1    | ---  | K.STCTGVEMFRK.L                    |
| 1574.9723 | 1573.9650 | 1573.9304 | 22.0 | 290   | - 304 | 0    | ---  | R.GQVLAKPGTIKPHTK.F                |
| 1728.9325 | 1727.9253 | 1727.8366 | 51.3 | 305   | - 319 | 1    | ---  | K.FESEVYILSKDEGGR.H                |
| 1797.0350 | 1796.0277 | 1795.9325 | 53.1 | 359   | - 374 | 0    | ---  | K.MVVTLIHPAMDGLR.F + Oxidation (M) |
| 1803.9918 | 1802.9845 | 1802.8799 | 58.0 | 60    | - 75  | 0    | ---  | R.GITINTSHVEYDTPTR.H               |
| 1965.1206 | 1964.1134 | 1963.9527 | 81.8 | 156   | - 172 | 0    | 44   | R.ELLSQYDFPGDDTPIVR.G              |
| 2117.3190 | 2116.3117 | 2116.1568 | 73.2 | 206   | - 224 | 0    | 28   | R.AIDKPFLLPIEDVFSISGR.G            |

No match to: 723.3202, 725.3349, 790.4618, 804.3175, 832.3504, 848.3077, 855.0634, 861.0816, 877.0593, 879.0642, 893.0384, 897.0395, 930.4819, 941.5245, 965.5432, 985.5503, 1001.5439, 1046.5846, 1179.6348, 1193.6685, 1219.5995, 1255.6486, 1269.6710, 1271.6285, 1277.6571, 1296.7322, 1320.6617, 1326.7448, 1348.7190, 1368.7612, 1450.7841, 1472.8880, 1475.8216, 1477.7796, 1494.8828, 1497.7996, 1509.8403, 1511.9038, 1527.8609, 1550.8947, 1598.9195, 1617.8806, 1631.8934, 1654.9031, 1707.9342, 1712.9042, 1733.0067, 1749.9856, 1755.9948, 1818.0212, 1866.0850, 1898.0605, 1915.0945, 1931.0593, 1947.0781, 1949.0662, 1967.1856, 1981.0932, 1988.1120, 1994.1406, 2005.1346, 2010.0916, 2139.2472, 2211.2249, 2229.2467, 2233.2426, 2271.2633, 2384.1999, 2399.2428, 2439.4144, 2451.4028, 2498.4046, 2615.4719, 2705.3847, 2808.6002, 3284.5981

18. [EFTU2\\_SHISS](#) Mass: 43457 Score: 138 Expect: 5.3e-09 Matches: 11

Elongation factor Tu 2 OS=Shigella sonnei (strain Ss046) OX=300269 GN=tuf2 PE=3 SV=1

| Observed  | Mr (expt) | Mr (calc) | ppm  | Start | End   | Miss | Ions | Peptide                            |
|-----------|-----------|-----------|------|-------|-------|------|------|------------------------------------|
| 837.5072  | 836.4999  | 836.4868  | 15.7 | 118   | - 124 | 0    | ---  | R.EHILLGR.Q                        |
| 1027.6166 | 1026.6093 | 1026.5822 | 26.4 | 271   | - 280 | 0    | ---  | R.AGENVGVLLR.G                     |
| 1214.6581 | 1213.6508 | 1213.6230 | 22.9 | 305   | - 314 | 0    | ---  | K.FESEVYILSK.D                     |
| 1233.6701 | 1232.6629 | 1232.6091 | 43.6 | 326   | - 334 | 0    | 15   | K.GYRPFYFR.T                       |
| 1315.7305 | 1314.7232 | 1314.6060 | 89.1 | 254   | - 264 | 1    | ---  | K.STCTGVEMFRK.L                    |
| 1574.9723 | 1573.9650 | 1573.9304 | 22.0 | 290   | - 304 | 0    | ---  | R.GQVLAKPGTIKPHTK.F                |
| 1728.9325 | 1727.9253 | 1727.8366 | 51.3 | 305   | - 319 | 1    | ---  | K.FESEVYILSKDEGGR.H                |
| 1797.0350 | 1796.0277 | 1795.9325 | 53.1 | 359   | - 374 | 0    | ---  | K.MVVTLIHPAMDGLR.F + Oxidation (M) |
| 1803.9918 | 1802.9845 | 1802.8799 | 58.0 | 60    | - 75  | 0    | ---  | R.GITINTSHVEYDTPTR.H               |
| 1965.1206 | 1964.1134 | 1963.9527 | 81.8 | 156   | - 172 | 0    | 44   | R.ELLSQYDFPGDDTPIVR.G              |
| 2117.3190 | 2116.3117 | 2116.1568 | 73.2 | 206   | - 224 | 0    | 28   | R.AIDKPFLLPIEDVFSISGR.G            |

No match to: 723.3202, 725.3349, 790.4618, 804.3175, 832.3504, 848.3077, 855.0634, 861.0816, 877.0593, 879.0642, 893.0384, 897.0395, 930.4819, 941.5245, 965.5432, 985.5503, 1001.5439, 1046.5846, 1179.6348, 1193.6685, 1219.5995, 1255.6486, 1269.6710, 1271.6285, 1277.6571, 1296.7322, 1320.6617, 1326.7448, 1348.7190, 1368.7612, 1450.7841, 1472.8880, 1475.8216, 1477.7796, 1494.8828, 1497.7996, 1509.8403, 1511.9038, 1527.8609, 1550.8947, 1598.9195, 1617.8806, 1631.8934, 1654.9031, 1707.9342, 1712.9042, 1733.0067, 1749.9856, 1755.9948, 1818.0212, 1866.0850, 1898.0605, 1915.0945, 1931.0593, 1947.0781, 1949.0662, 1967.1856, 1981.0932, 1988.1120, 1994.1406, 2005.1346, 2010.0916, 2139.2472, 2211.2249, 2229.2467, 2233.2426, 2271.2633, 2384.1999, 2399.2428, 2439.4144, 2451.4028, 2498.4046, 2615.4719, 2705.3847, 2808.6002, 3284.5981

19. [EFTU2\\_EC057](#) Mass: 43457 Score: 138 Expect: 5.3e-09 Matches: 11

Elongation factor Tu OS=Escherichia coli O157:H7 OX=83334 GN=tufA PE=3 SV=2

| Observed  | Mr (expt) | Mr (calc) | ppm  | Start | End   | Miss | Ions | Peptide        |
|-----------|-----------|-----------|------|-------|-------|------|------|----------------|
| 837.5072  | 836.4999  | 836.4868  | 15.7 | 118   | - 124 | 0    | ---  | R.EHILLGR.Q    |
| 1027.6166 | 1026.6093 | 1026.5822 | 26.4 | 271   | - 280 | 0    | ---  | R.AGENVGVLLR.G |

|           |           |           |      |     |   |     |   |     |                                      |
|-----------|-----------|-----------|------|-----|---|-----|---|-----|--------------------------------------|
| 1214.6581 | 1213.6508 | 1213.6230 | 22.9 | 305 | - | 314 | 0 | --- | K.FESEVYILSK.D                       |
| 1233.6701 | 1232.6629 | 1232.6091 | 43.6 | 326 | - | 334 | 0 | 15  | K.GYRPFYFR.T                         |
| 1315.7305 | 1314.7232 | 1314.6060 | 89.1 | 254 | - | 264 | 1 | --- | K.STCTGVEMFRK.L                      |
| 1574.9723 | 1573.9650 | 1573.9304 | 22.0 | 290 | - | 304 | 0 | --- | R.GQVLAKPGTIKPHTK.F                  |
| 1728.9325 | 1727.9253 | 1727.8366 | 51.3 | 305 | - | 319 | 1 | --- | K.FESEVYILSKDEGGR.H                  |
| 1797.0350 | 1796.0277 | 1795.9325 | 53.1 | 359 | - | 374 | 0 | --- | K.MVVTLIHPIAMDDGLR.F + Oxidation (M) |
| 1803.9918 | 1802.9845 | 1802.8799 | 58.0 | 60  | - | 75  | 0 | --- | R.GTTINTSHVEYDTPTR.H                 |
| 1965.1206 | 1964.1134 | 1963.9527 | 81.8 | 156 | - | 172 | 0 | 44  | R.ELLSQYDFPGDDTPIVR.G                |
| 2117.3190 | 2116.3117 | 2116.1568 | 73.2 | 206 | - | 224 | 0 | 28  | R.AIDKPFLLPIEDVFSISGR.G              |

No match to: 723.3202, 725.3349, 790.4618, 804.3175, 832.3504, 848.3077, 855.0634, 861.0816, 877.0593, 879.0642, 893.0384, 897.0395, 930.4819, 941.5245, 965.5432, 985.5503, 1001.5439, 1046.5846, 1179.6348, 1193.6685, 1219.5995, 1255.6486, 1269.6710, 1271.6285, 1277.6571, 1296.7322, 1320.6617, 1326.7448, 1348.7190, 1368.7612, 1450.7841, 1472.8880, 1475.8216, 1477.7796, 1494.8828, 1497.7996, 1509.8403, 1511.9038, 1527.8609, 1550.8947, 1598.9195, 1617.8806, 1631.8934, 1654.9031, 1707.9342, 1712.9042, 1733.0067, 1749.9856, 1755.9948, 1818.0212, 1866.0850, 1898.0605, 1915.0945, 1931.0593, 1947.0781, 1949.0662, 1967.1856, 1981.0932, 1988.1120, 1994.1406, 2005.1346, 2010.0916, 2139.2472, 2211.2249, 2229.2467, 2233.2426, 2271.2633, 2384.1999, 2399.2428, 2439.4144, 2451.4028, 2498.4046, 2615.4719, 2705.3847, 2808.6002, 3284.5981

20. [EFTU\\_ECOL6](#) Mass: 43457 Score: 138 Expect: 5.3e-09 Matches: 11

Elongation factor Tu OS=Escherichia coli O6:H1 (strain CFT073 / ATCC 700928 / UPEC) OX=199310 GN=tufA PE=3 SV=2

| Observed  | Mr (expt) | Mr (calc) | ppm  | Start | End | Miss | Ions | Peptide |                                      |
|-----------|-----------|-----------|------|-------|-----|------|------|---------|--------------------------------------|
| 837.5072  | 836.4999  | 836.4868  | 15.7 | 118   | -   | 124  | 0    | ---     | R.EHILLGR.Q                          |
| 1027.6166 | 1026.6093 | 1026.5822 | 26.4 | 271   | -   | 280  | 0    | ---     | R.AGENVGVLLR.G                       |
| 1214.6581 | 1213.6508 | 1213.6230 | 22.9 | 305   | -   | 314  | 0    | ---     | K.FESEVYILSK.D                       |
| 1233.6701 | 1232.6629 | 1232.6091 | 43.6 | 326   | -   | 334  | 0    | 15      | K.GYRPFYFR.T                         |
| 1315.7305 | 1314.7232 | 1314.6060 | 89.1 | 254   | -   | 264  | 1    | ---     | K.STCTGVEMFRK.L                      |
| 1574.9723 | 1573.9650 | 1573.9304 | 22.0 | 290   | -   | 304  | 0    | ---     | R.GQVLAKPGTIKPHTK.F                  |
| 1728.9325 | 1727.9253 | 1727.8366 | 51.3 | 305   | -   | 319  | 1    | ---     | K.FESEVYILSKDEGGR.H                  |
| 1797.0350 | 1796.0277 | 1795.9325 | 53.1 | 359   | -   | 374  | 0    | ---     | K.MVVTLIHPIAMDDGLR.F + Oxidation (M) |
| 1803.9918 | 1802.9845 | 1802.8799 | 58.0 | 60    | -   | 75   | 0    | ---     | R.GTTINTSHVEYDTPTR.H                 |
| 1965.1206 | 1964.1134 | 1963.9527 | 81.8 | 156   | -   | 172  | 0    | 44      | R.ELLSQYDFPGDDTPIVR.G                |
| 2117.3190 | 2116.3117 | 2116.1568 | 73.2 | 206   | -   | 224  | 0    | 28      | R.AIDKPFLLPIEDVFSISGR.G              |

No match to: 723.3202, 725.3349, 790.4618, 804.3175, 832.3504, 848.3077, 855.0634, 861.0816, 877.0593, 879.0642, 893.0384, 897.0395, 930.4819, 941.5245, 965.5432, 985.5503, 1001.5439, 1046.5846, 1179.6348, 1193.6685, 1219.5995, 1255.6486, 1269.6710, 1271.6285, 1277.6571, 1296.7322, 1320.6617, 1326.7448, 1348.7190, 1368.7612, 1450.7841, 1472.8880, 1475.8216, 1477.7796, 1494.8828, 1497.7996, 1509.8403, 1511.9038, 1527.8609, 1550.8947, 1598.9195, 1617.8806, 1631.8934, 1654.9031, 1707.9342, 1712.9042, 1733.0067, 1749.9856, 1755.9948, 1818.0212, 1866.0850, 1898.0605, 1915.0945, 1931.0593, 1947.0781, 1949.0662, 1967.1856, 1981.0932, 1988.1120, 1994.1406, 2005.1346, 2010.0916, 2139.2472, 2211.2249, 2229.2467, 2233.2426, 2271.2633, 2384.1999, 2399.2428, 2439.4144, 2451.4028, 2498.4046, 2615.4719, 2705.3847, 2808.6002, 3284.5981

## Search Parameters

Type of search : MS/MS Ion Search  
 Enzyme : Trypsin  
 Fixed modifications : [Carbamidomethyl \(C\)](#)  
 Variable modifications : [Oxidation \(M\)](#)  
 Mass values : Monoisotopic  
 Protein Mass : Unrestricted  
 Peptide Mass Tolerance : ± 150 ppm  
 Fragment Mass Tolerance : ± 2 Da  
 Max Missed Cleavages : 1  
 Instrument type : MALDI-TOF-TOF

Query1 (723.3202,+): <no title>  
 Query2 (725.3349,+): <no title>  
 Query3 (790.4618,+): <no title>  
 Query4 (804.3175,+): <no title>  
 Query5 (832.3504,+): <no title>  
 Query6 (837.5072,+): <no title>  
 Query7 (848.3077,+): <no title>  
 Query8 (855.0634,+): <no title>  
 Query9 (861.0816,+): <no title>  
 Query10 (877.0593,+): <no title>  
 Query11 (879.0642,+): <no title>  
 Query12 (893.0384,+): <no title>  
 Query13 (897.0395,+): <no title>  
 Query14 (930.4819,+): <no title>  
 Query15 (941.5245,+): <no title>  
 Query16 (965.5432,+): <no title>  
 Query17 (985.5503,+): <no title>  
 Query18 (1001.5439,+): <no title>  
 Query19 (1027.6166,+): <no title>  
 Query20 (1046.5846,+): <no title>  
 Query21 (1179.6348,+): <no title>  
 Query22 (1193.6685,+): <no title>  
 Query23 (1214.6581,+): <no title>  
 Query24 (1219.5995,+): <no title>  
 Query25 (1233.6701,+): <no title>  
 Query26 (1255.6486,+): <no title>  
 Query27 (1269.6710,+): <no title>  
 Query28 (1271.6285,+): <no title>  
 Query29 (1277.6571,+): <no title>  
 Query30 (1296.7322,+): <no title>  
 Query31 (1315.7305,+): <no title>  
 Query32 (1320.6617,+): <no title>  
 Query33 (1326.7448,+): <no title>  
 Query34 (1348.7190,+): <no title>  
 Query35 (1368.7612,+): <no title>  
 Query36 (1450.7841,+): <no title>  
 Query37 (1472.8880,+): <no title>  
 Query38 (1475.8216,+): <no title>  
 Query39 (1477.7796,+): <no title>  
 Query40 (1494.8828,+): <no title>  
 Query41 (1497.7996,+): <no title>  
 Query42 (1509.8403,+): <no title>  
 Query43 (1511.9038,+): <no title>  
 Query44 (1527.8609,+): <no title>  
 Query45 (1550.8947,+): <no title>  
 Query46 (1574.9723,+): <no title>  
 Query47 (1598.9195,+): <no title>  
 Query48 (1617.8806,+): <no title>

Query49 (1631.8934,1+) : <no title>  
Query50 (1654.9031,1+) : <no title>  
Query51 (1707.9342,1+) : <no title>  
Query52 (1712.9042,1+) : <no title>  
Query53 (1728.9325,1+) : <no title>  
Query54 (1733.0067,1+) : <no title>  
Query55 (1749.9856,1+) : <no title>  
Query56 (1755.9948,1+) : <no title>  
Query57 (1797.0350,1+) : <no title>  
Query58 (1803.9918,1+) : <no title>  
Query59 (1818.0212,1+) : <no title>  
Query60 (1866.0850,1+) : <no title>  
Query61 (1898.0605,1+) : <no title>  
Query62 (1915.0945,1+) : <no title>  
Query63 (1931.0593,1+) : <no title>  
Query64 (1947.0781,1+) : <no title>  
Query65 (1949.0662,1+) : <no title>  
Query66 (1965.1206,1+) : <no title>  
Query67 (1967.1856,1+) : <no title>  
Query68 (1981.0932,1+) : <no title>  
Query69 (1988.1120,1+) : <no title>  
Query70 (1994.1406,1+) : <no title>  
Query71 (2005.1346,1+) : <no title>  
Query72 (2010.0916,1+) : <no title>  
Query73 (2117.3190,1+) : <no title>  
Query74 (2139.2472,1+) : <no title>  
Query75 (2211.2249,1+) : <no title>  
Query76 (2229.2467,1+) : <no title>  
Query77 (2233.2426,1+) : <no title>  
Query78 (2271.2633,1+) : <no title>  
Query79 (2384.1999,1+) : <no title>  
Query80 (2399.2428,1+) : <no title>  
Query81 (2439.4144,1+) : <no title>  
Query82 (2451.4028,1+) : <no title>  
Query83 (2498.4046,1+) : <no title>  
Query84 (2615.4719,1+) : <no title>  
Query85 (2705.3847,1+) : <no title>  
Query86 (2808.6002,1+) : <no title>  
Query87 (3284.5981,1+) : <no title>

Mascot: <http://www.matrixscience.com/>



*MALDI MS MS Data Sheet For  
Blood Isolate*

Comment 1

Comment 2

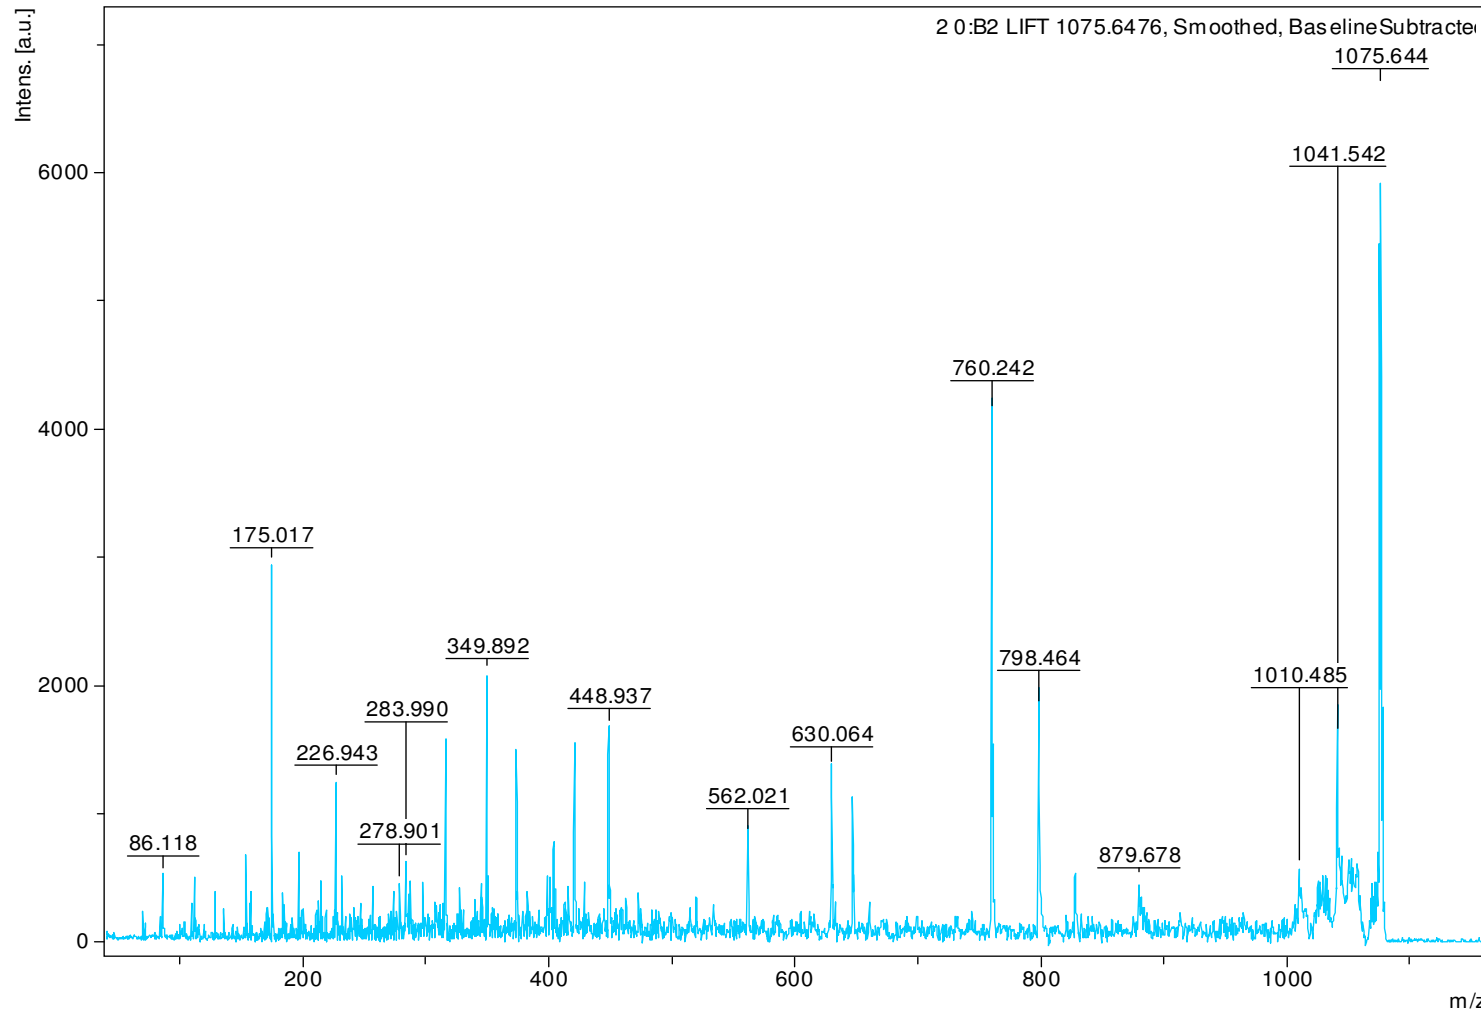

| m/z     | S/N  | Quality Fac. | Res. | Intens. | Area |
|---------|------|--------------|------|---------|------|
| 70.067  | 6.5  | 315          | 354  | 271.28  | 59   |
| 72.109  | 3.7  | 166          | 282  | 154.67  | 43   |
| 86.118  | 12.0 | 3410         | 385  | 539.50  | 133  |
| 104.032 | 3.3  | 133          | 629  | 153.14  | 28   |
| 110.020 | 6.5  | 1427         | 597  | 303.61  | 63   |
| 112.061 | 10.5 | 1726         | 547  | 490.46  | 113  |
| 115.079 | 3.1  | 51           | 763  | 147.28  | 25   |
| 129.058 | 8.3  | 1795         | 701  | 392.29  | 82   |
| 136.008 | 5.3  | 587          | 754  | 259.11  | 53   |
| 153.994 | 14.1 | 3801         | 936  | 694.28  | 131  |
| 158.014 | 8.1  | 1113         | 940  | 404.06  | 78   |
| 169.011 | 3.0  | 74           | 770  | 156.49  | 40   |
| 170.998 | 5.2  | 61           | 827  | 270.92  | 65   |
| 175.017 | 55.8 | 31800        | 944  | 2960.91 | 642  |
| 183.957 | 7.2  | 123          | 939  | 395.64  | 91   |
| 191.965 | 3.5  | 31           | 1349 | 199.70  | 34   |
| 196.973 | 12.3 | 1438         | 1052 | 715.12  | 159  |
| 200.967 | 4.3  | 69           | 912  | 254.96  | 67   |
| 210.968 | 4.3  | 131          | 1058 | 264.94  | 63   |
| 213.003 | 5.2  | 177          | 962  | 327.58  | 87   |
| 214.965 | 7.6  | 673          | 1095 | 480.64  | 113  |
| 218.978 | 4.0  | 256          | 1178 | 255.81  | 57   |
| 226.943 | 19.0 | 6603         | 1194 | 1267.92 | 290  |
| 231.985 | 7.7  | 3446         | 1075 | 517.95  | 135  |
| 246.963 | 4.3  | 47           | 1236 | 317.11  | 77   |
| 256.977 | 5.9  | 391          | 933  | 445.94  | 151  |
| 273.970 | 5.0  | 99           | 1146 | 418.39  | 124  |
| 278.901 | 5.6  | 319          | 1204 | 474.85  | 137  |
| 283.990 | 7.4  | 1635         | 1028 | 645.45  | 222  |
| 285.916 | 4.1  | 54           | 1081 | 363.36  | 120  |
| 287.938 | 5.5  | 317          | 1044 | 492.20  | 169  |
| 297.936 | 5.1  | 87           | 1245 | 482.50  | 145  |
| 315.925 | 15.6 | 15405        | 1271 | 1584.39 | 499  |
| 327.968 | 4.2  | 55           | 1195 | 449.94  | 158  |
| 344.925 | 4.2  | 35           | 1326 | 477.57  | 160  |
| 349.892 | 18.3 | 16791        | 1293 | 2121.79 | 742  |
| 373.912 | 12.3 | 5576         | 1278 | 1539.24 | 590  |
| 398.949 | 3.9  | 184          | 1049 | 530.41  | 268  |

| m/z      | S/N  | Quality Fac. | Res. | Intens. | Area |
|----------|------|--------------|------|---------|------|
| 400.918  | 3.6  | 83           | 1114 | 488.35  | 234  |
| 403.932  | 6.0  | 287          | 1319 | 817.26  | 333  |
| 415.998  | 3.1  | 97           | 958  | 436.01  | 254  |
| 420.974  | 11.0 | 15256        | 1258 | 1544.85 | 695  |
| 428.909  | 3.4  | 83           | 1402 | 485.81  | 201  |
| 448.937  | 11.6 | 14331        | 1255 | 1691.94 | 826  |
| 562.021  | 5.7  | 467          | 1227 | 846.85  | 563  |
| 630.064  | 9.5  | 4485         | 1351 | 1368.90 | 970  |
| 647.094  | 8.3  | 2333         | 1402 | 1189.74 | 843  |
| 760.242  | 30.3 | 76102        | 1462 | 4140.41 | 3525 |
| 798.464  | 13.6 | 5889         | 1278 | 1845.77 | 1931 |
| 828.324  | 4.0  | 582          | 1439 | 533.65  | 523  |
| 879.678  | 3.6  | 33           | 1478 | 505.27  | 527  |
| 1010.485 | 5.3  | 189          | 1264 | 601.90  | 908  |
| 1029.275 | 4.4  | 197          | 1766 | 465.09  | 517  |
| 1031.448 | 5.1  | 98           | 1482 | 537.17  | 714  |
| 1041.542 | 16.1 | 5257         | 1476 | 1625.95 | 2204 |
| 1044.635 | 5.3  | 173          | 1208 | 528.01  | 879  |
| 1050.224 | 6.1  | 104          | 1239 | 583.09  | 955  |
| 1052.621 | 5.9  | 109          | 1170 | 554.77  | 965  |
| 1055.007 | 5.7  | 95           | 1172 | 545.89  | 952  |
| 1057.468 | 6.0  | 188          | 1175 | 575.27  | 1003 |
| 1068.607 | 5.4  | 88           | 1890 | 485.64  | 539  |
| 1075.644 | 75.9 | 4039         | 2819 | 6682.54 | 5023 |
| 1077.875 | 6.1  | 99           | 2124 | 534.53  | 534  |

Comment 1

Comment 2

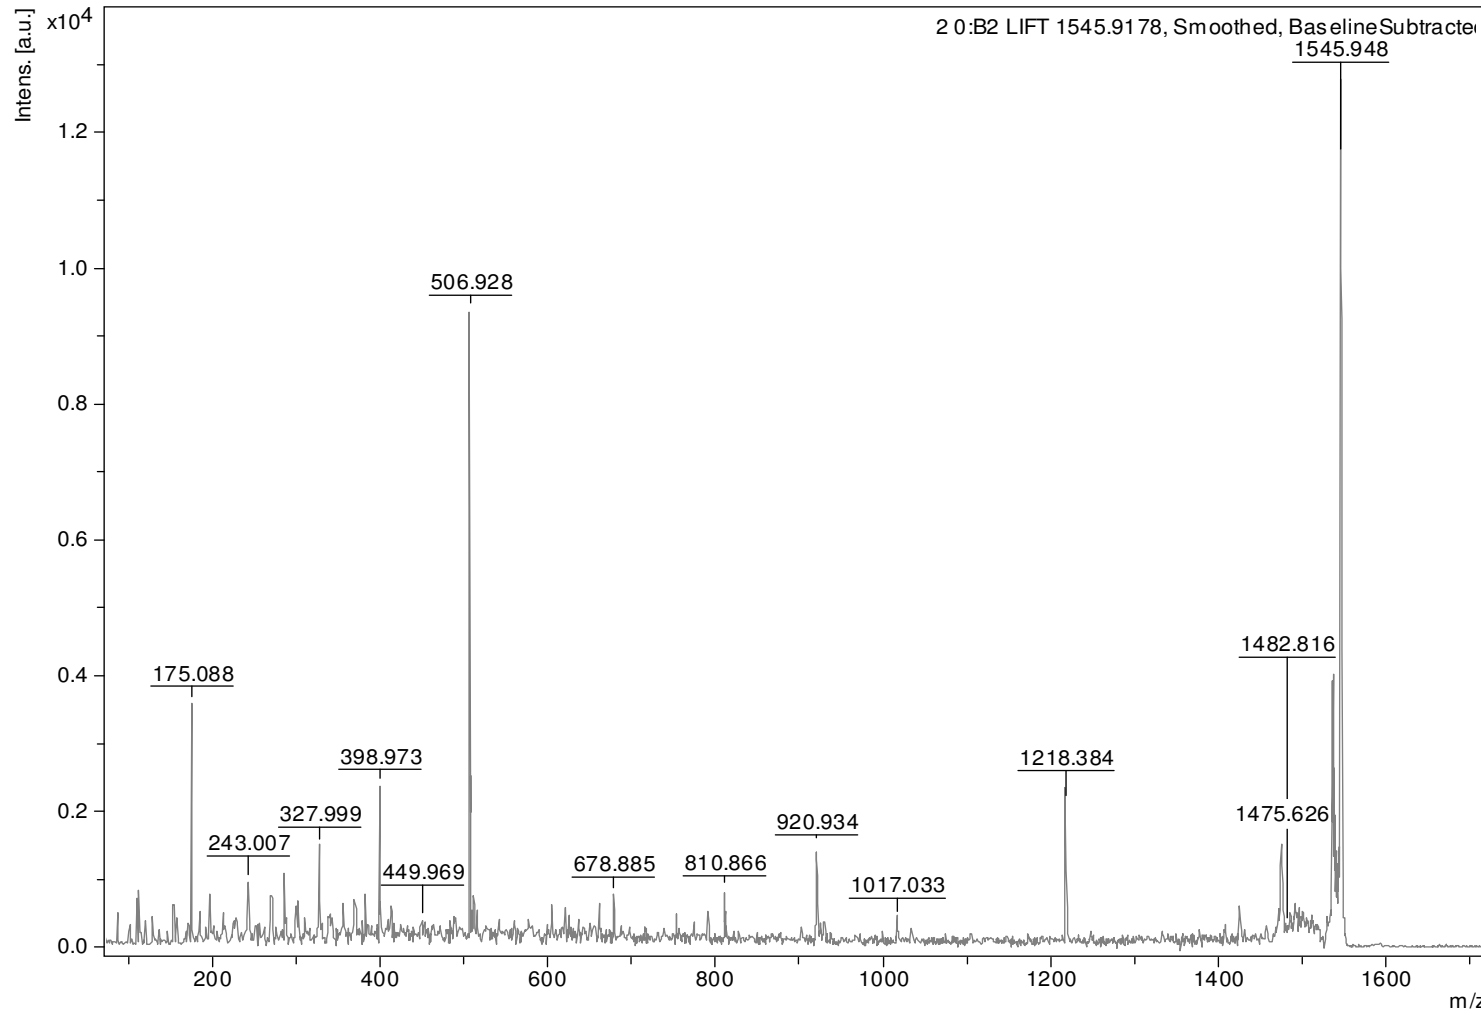

| m/z     | S/N  | Quality Fac. | Res. | Intens. | Area |
|---------|------|--------------|------|---------|------|
| 70.067  | 5.9  | 167          | 613  | 319.40  | 40   |
| 86.149  | 8.5  | 621          | 501  | 465.31  | 89   |
| 101.112 | 5.8  | 273          | 849  | 324.21  | 43   |
| 110.093 | 13.0 | 12421        | 972  | 725.72  | 92   |
| 112.104 | 14.3 | 1623         | 858  | 802.01  | 118  |
| 120.097 | 6.9  | 284          | 1029 | 382.17  | 50   |
| 129.106 | 8.1  | 639          | 1027 | 455.92  | 65   |
| 136.086 | 4.5  | 358          | 1084 | 250.78  | 36   |
| 147.081 | 4.2  | 292          | 1079 | 230.69  | 36   |
| 154.074 | 11.2 | 679          | 1040 | 626.85  | 106  |
| 158.083 | 7.6  | 1365         | 1091 | 422.57  | 70   |
| 169.065 | 4.2  | 95           | 1381 | 236.18  | 34   |
| 171.084 | 6.5  | 63           | 1345 | 362.39  | 54   |
| 175.088 | 64.3 | 28130        | 1324 | 3601.47 | 557  |
| 185.081 | 9.6  | 884          | 1196 | 531.95  | 97   |
| 192.054 | 5.3  | 124          | 1218 | 294.86  | 55   |
| 197.071 | 14.6 | 991          | 1344 | 817.70  | 142  |
| 201.057 | 5.4  | 48           | 1204 | 305.23  | 60   |
| 205.059 | 4.1  | 38           | 1230 | 235.58  | 47   |
| 213.069 | 9.2  | 353          | 1355 | 523.77  | 98   |
| 215.051 | 5.4  | 53           | 1239 | 308.59  | 64   |
| 226.038 | 7.4  | 62           | 1425 | 427.16  | 82   |
| 228.046 | 7.9  | 34           | 1469 | 457.40  | 86   |
| 230.020 | 5.6  | 169          | 1374 | 325.56  | 66   |
| 235.035 | 3.6  | 32           | 1437 | 207.40  | 41   |
| 243.007 | 16.9 | 757          | 1504 | 994.61  | 195  |
| 251.051 | 5.2  | 49           | 1312 | 311.77  | 73   |
| 256.034 | 6.2  | 74           | 1511 | 377.19  | 78   |
| 268.023 | 7.2  | 53           | 1410 | 448.63  | 105  |
| 270.023 | 12.3 | 1623         | 1455 | 768.81  | 176  |
| 272.022 | 11.5 | 617          | 1474 | 719.30  | 164  |
| 276.012 | 5.0  | 48           | 1559 | 320.88  | 70   |
| 285.993 | 16.8 | 651          | 1514 | 1128.50 | 266  |
| 299.996 | 9.1  | 100          | 1556 | 643.96  | 156  |
| 302.995 | 9.9  | 469          | 1559 | 700.60  | 171  |
| 310.978 | 6.4  | 40           | 1627 | 469.24  | 113  |
| 314.021 | 3.5  | 46           | 1332 | 259.99  | 78   |
| 315.992 | 3.8  | 57           | 1412 | 287.48  | 82   |

| m/z      | S/N  | Quality | Fac. | Res.    | Intens. | Area |
|----------|------|---------|------|---------|---------|------|
| 327.999  | 19.0 | 3652    | 1617 | 1519.11 | 393     |      |
| 330.971  | 4.5  | 57      | 1725 | 359.10  | 88      |      |
| 338.985  | 5.8  | 67      | 1463 | 485.48  | 144     |      |
| 341.016  | 6.2  | 95      | 1625 | 520.47  | 140     |      |
| 342.993  | 5.1  | 42      | 1641 | 439.11  | 118     |      |
| 355.964  | 7.6  | 101     | 1633 | 681.51  | 193     |      |
| 368.999  | 7.8  | 254     | 1636 | 739.76  | 218     |      |
| 370.994  | 6.6  | 122     | 1536 | 625.51  | 198     |      |
| 379.011  | 4.3  | 51      | 1438 | 422.99  | 146     |      |
| 382.004  | 8.2  | 393     | 1621 | 805.12  | 250     |      |
| 398.973  | 23.2 | 8300    | 1732 | 2413.01 | 738     |      |
| 449.969  | 3.6  | 51      | 1764 | 430.69  | 150     |      |
| 487.945  | 3.5  | 58      | 1737 | 474.68  | 186     |      |
| 489.912  | 3.1  | 67      | 1883 | 425.50  | 155     |      |
| 506.928  | 66.6 | 443857  | 2062 | 9417.07 | 3263    |      |
| 511.983  | 5.9  | 94      | 1872 | 836.98  | 323     |      |
| 515.957  | 4.1  | 70      | 2012 | 590.26  | 214     |      |
| 604.888  | 4.0  | 134     | 2084 | 638.77  | 278     |      |
| 621.861  | 3.8  | 84      | 2038 | 606.28  | 280     |      |
| 625.936  | 3.1  | 47      | 2003 | 508.79  | 241     |      |
| 661.869  | 4.0  | 107     | 2013 | 667.46  | 340     |      |
| 678.885  | 4.8  | 560     | 1995 | 798.68  | 425     |      |
| 791.929  | 3.5  | 234     | 1836 | 547.68  | 394     |      |
| 810.866  | 5.6  | 310     | 1802 | 877.76  | 666     |      |
| 920.934  | 10.9 | 681     | 1966 | 1539.28 | 1294    |      |
| 1017.033 | 3.4  | 157     | 1775 | 453.53  | 492     |      |
| 1218.384 | 15.8 | 5533    | 1976 | 2148.04 | 2832    |      |
| 1425.686 | 4.5  | 664     | 1894 | 591.76  | 1074    |      |
| 1475.626 | 15.7 | 97      | 2855 | 1721.10 | 2208    |      |
| 1482.816 | 3.3  | 55      | 1961 | 357.08  | 674     |      |
| 1486.532 | 4.0  | 47      | 1651 | 421.05  | 947     |      |
| 1491.087 | 6.6  | 130     | 1811 | 698.68  | 1441    |      |
| 1494.193 | 4.1  | 245     | 2299 | 434.63  | 708     |      |
| 1497.274 | 5.1  | 126     | 2415 | 525.35  | 818     |      |
| 1500.585 | 5.9  | 90      | 2417 | 611.75  | 954     |      |
| 1505.295 | 3.8  | 141     | 1671 | 376.75  | 857     |      |
| 1510.995 | 4.3  | 129     | 1680 | 426.87  | 973     |      |
| 1519.840 | 3.0  | 110     | 2067 | 297.46  | 557     |      |
| 1528.985 | 3.9  | 50      | 1809 | 363.71  | 787     |      |
| 1536.794 | 45.8 | 26574   | 2951 | 4215.63 | 5646    |      |
| 1539.087 | 12.9 | 454     | 3906 | 1179.65 | 1197    |      |

---

| m/z      | S/N   | Quality Fac. | Res. | Intens.  | Area  |
|----------|-------|--------------|------|----------|-------|
| 1543.640 | 12.0  | 110          | 3186 | 1091.06  | 1365  |
| 1545.948 | 129.7 | 55975        | 3356 | 11671.00 | 13889 |

Comment 1

Comment 2

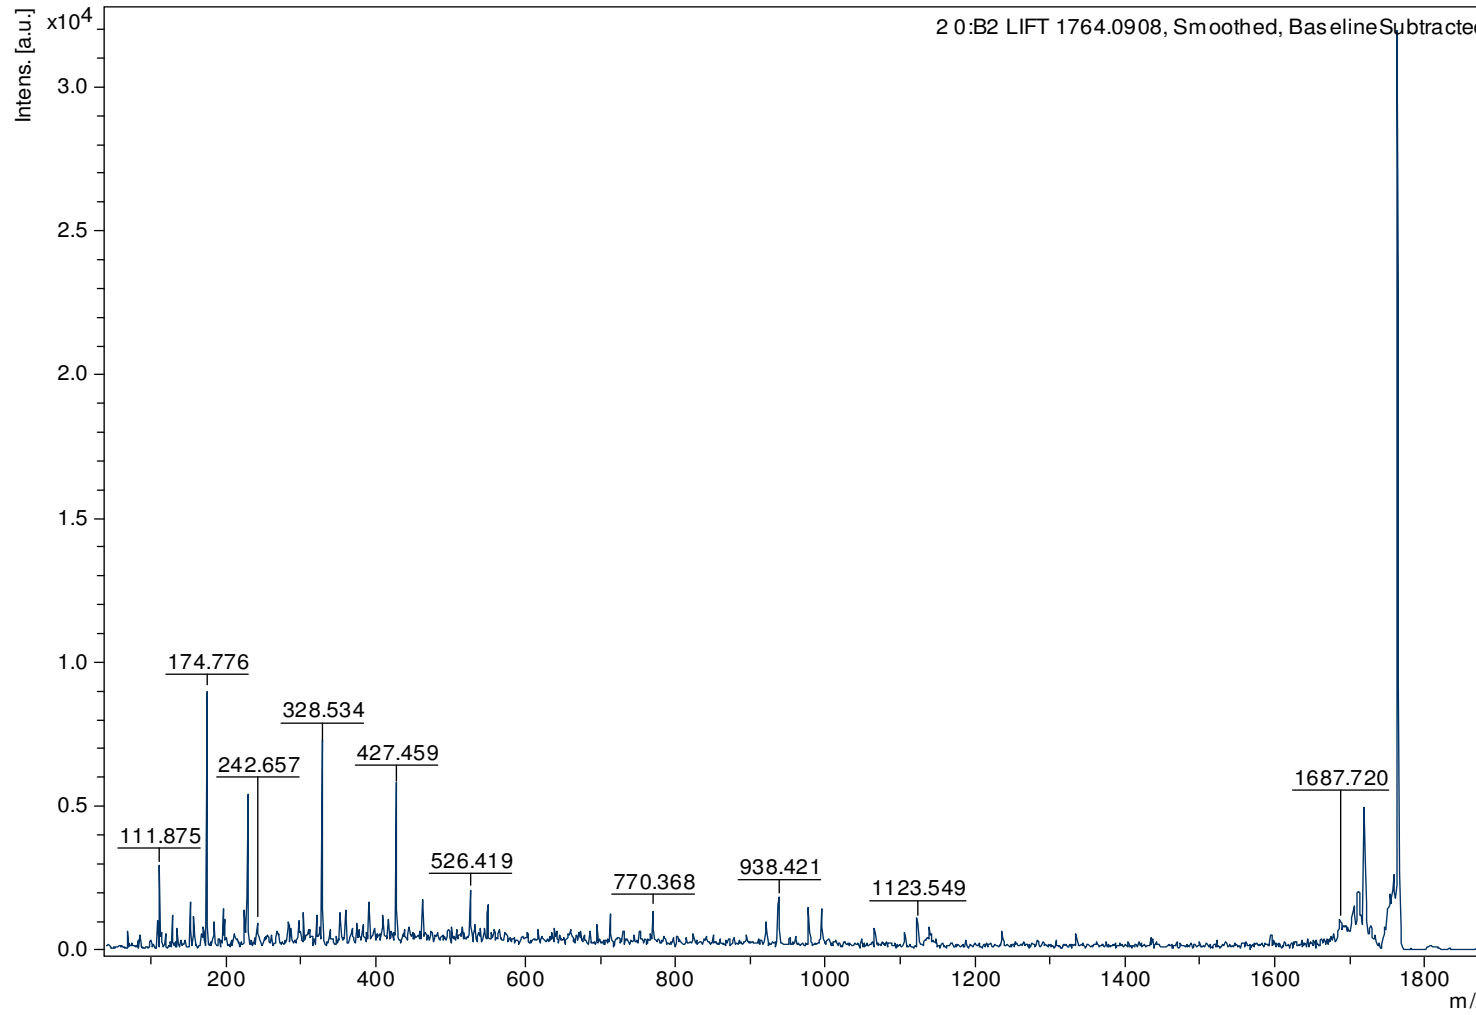

| m/z     | S/N  | Quality | Fac. | Res.    | Intens. | Area |
|---------|------|---------|------|---------|---------|------|
| 69.915  | 7.0  | 1092    | 413  | 683.16  | 127     |      |
| 83.901  | 3.6  | 1395    | 684  | 350.30  | 48      |      |
| 85.930  | 5.4  | 590     | 545  | 528.28  | 92      |      |
| 100.885 | 3.4  | 152     | 679  | 329.83  | 55      |      |
| 111.875 | 29.7 | 10731   | 1003 | 2919.78 | 365     |      |
| 114.865 | 6.3  | 1415    | 1099 | 622.00  | 73      |      |
| 119.860 | 6.0  | 1647    | 933  | 589.23  | 85      |      |
| 128.867 | 12.6 | 3926    | 1125 | 1246.13 | 161     |      |
| 132.849 | 3.1  | 628     | 1216 | 307.18  | 38      |      |
| 135.824 | 7.8  | 2696    | 1114 | 769.87  | 106     |      |
| 140.813 | 3.1  | 72      | 887  | 310.47  | 56      |      |
| 146.822 | 3.3  | 260     | 1162 | 330.77  | 48      |      |
| 153.801 | 16.5 | 3036    | 1230 | 1675.38 | 240     |      |
| 157.788 | 11.7 | 2830    | 1324 | 1200.51 | 164     |      |
| 168.780 | 5.5  | 841     | 1144 | 577.94  | 99      |      |
| 170.797 | 8.0  | 189     | 1250 | 839.72  | 134     |      |
| 174.776 | 85.6 | 23237   | 1241 | 9022.79 | 1486    |      |
| 180.758 | 3.1  | 44      | 1297 | 333.12  | 54      |      |
| 185.745 | 9.0  | 1749    | 1159 | 980.33  | 185     |      |
| 191.754 | 3.7  | 69      | 1120 | 405.09  | 82      |      |
| 196.762 | 13.4 | 2807    | 1195 | 1508.71 | 294     |      |
| 198.754 | 9.5  | 991     | 1237 | 1077.69 | 205     |      |
| 201.720 | 3.7  | 145     | 1181 | 427.47  | 87      |      |
| 211.710 | 5.5  | 59      | 1230 | 671.73  | 138     |      |
| 216.737 | 3.1  | 54      | 1251 | 384.25  | 80      |      |
| 225.679 | 11.3 | 521     | 1195 | 1478.78 | 336     |      |
| 229.653 | 40.7 | 14995   | 1305 | 5414.73 | 1150    |      |
| 242.657 | 6.8  | 118     | 1141 | 960.04  | 248     |      |
| 261.627 | 3.5  | 70      | 1169 | 555.96  | 153     |      |
| 271.651 | 3.3  | 38      | 1164 | 567.74  | 164     |      |
| 282.583 | 4.5  | 88      | 1163 | 823.62  | 249     |      |
| 284.592 | 5.5  | 132     | 1321 | 1029.73 | 276     |      |
| 287.644 | 4.2  | 117     | 1077 | 807.28  | 269     |      |
| 297.599 | 5.3  | 189     | 1348 | 1058.09 | 293     |      |
| 304.561 | 6.1  | 705     | 1281 | 1267.75 | 379     |      |
| 321.535 | 5.6  | 466     | 1455 | 1271.77 | 357     |      |
| 328.534 | 30.3 | 10341   | 1375 | 7100.37 | 2166    |      |
| 353.503 | 5.0  | 94      | 1170 | 1306.25 | 511     |      |

| m/z      | S/N   | Quality | Fac. | Res.     | Intens. | Area |
|----------|-------|---------|------|----------|---------|------|
| 360.483  | 5.2   | 548     | 1401 | 1379.37  | 461     |      |
| 375.492  | 3.5   | 59      | 1377 | 991.13   | 354     |      |
| 392.466  | 5.7   | 481     | 1439 | 1706.70  | 616     |      |
| 410.458  | 4.3   | 37      | 1530 | 1346.58  | 483     |      |
| 417.438  | 3.4   | 61      | 1345 | 1074.88  | 448     |      |
| 427.459  | 17.5  | 11923   | 1500 | 5695.62  | 2190    |      |
| 463.428  | 5.2   | 470     | 1474 | 1818.29  | 787     |      |
| 526.419  | 5.7   | 612     | 1569 | 2099.23  | 1003    |      |
| 550.406  | 4.3   | 486     | 1632 | 1595.58  | 776     |      |
| 713.359  | 3.8   | 186     | 2042 | 1292.23  | 720     |      |
| 770.368  | 4.3   | 213     | 1977 | 1417.87  | 910     |      |
| 921.362  | 3.6   | 344     | 2078 | 1027.60  | 818     |      |
| 938.421  | 6.4   | 3509    | 2315 | 1812.04  | 1331    |      |
| 978.384  | 5.0   | 685     | 2056 | 1382.18  | 1219    |      |
| 995.451  | 5.4   | 2464    | 2092 | 1453.67  | 1294    |      |
| 1066.498 | 3.4   | 316     | 2048 | 853.84   | 866     |      |
| 1123.549 | 4.4   | 542     | 1685 | 1024.24  | 1382    |      |
| 1139.398 | 3.7   | 48      | 2780 | 855.65   | 716     |      |
| 1683.994 | 3.8   | 40      | 2218 | 684.99   | 1464    |      |
| 1687.720 | 5.8   | 215     | 2221 | 1032.58  | 2211    |      |
| 1690.911 | 3.7   | 120     | 1938 | 647.38   | 1595    |      |
| 1694.164 | 3.4   | 75      | 1880 | 592.83   | 1512    |      |
| 1698.333 | 4.4   | 86      | 2298 | 775.06   | 1624    |      |
| 1702.668 | 4.4   | 60      | 2300 | 761.09   | 1601    |      |
| 1704.734 | 6.6   | 372     | 1894 | 1127.98  | 2902    |      |
| 1707.440 | 5.4   | 120     | 1897 | 912.58   | 2345    |      |
| 1710.956 | 11.3  | 1881    | 1899 | 1899.44  | 4891    |      |
| 1713.458 | 4.4   | 88      | 1904 | 749.33   | 1935    |      |
| 1715.767 | 6.0   | 112     | 1906 | 1007.12  | 2602    |      |
| 1719.875 | 23.6  | 14604   | 1911 | 3915.19  | 10117   |      |
| 1726.462 | 3.7   | 195     | 1917 | 611.75   | 1590    |      |
| 1728.640 | 3.4   | 112     | 1921 | 551.73   | 1433    |      |
| 1746.077 | 3.3   | 80      | 1940 | 509.64   | 1339    |      |
| 1748.306 | 3.5   | 58      | 2769 | 555.87   | 1025    |      |
| 1750.529 | 8.6   | 245     | 3210 | 1351.89  | 2166    |      |
| 1753.901 | 11.7  | 1974    | 4162 | 1812.12  | 2238    |      |
| 1757.257 | 11.9  | 1510    | 4209 | 1835.70  | 2252    |      |
| 1759.503 | 9.2   | 74      | 3891 | 1408.83  | 1876    |      |
| 1761.873 | 13.3  | 46      | 3288 | 2034.04  | 3209    |      |
| 1764.091 | 163.1 | 28936   | 3073 | 24768.05 | 41892   |      |



Comment 1

Comment 2

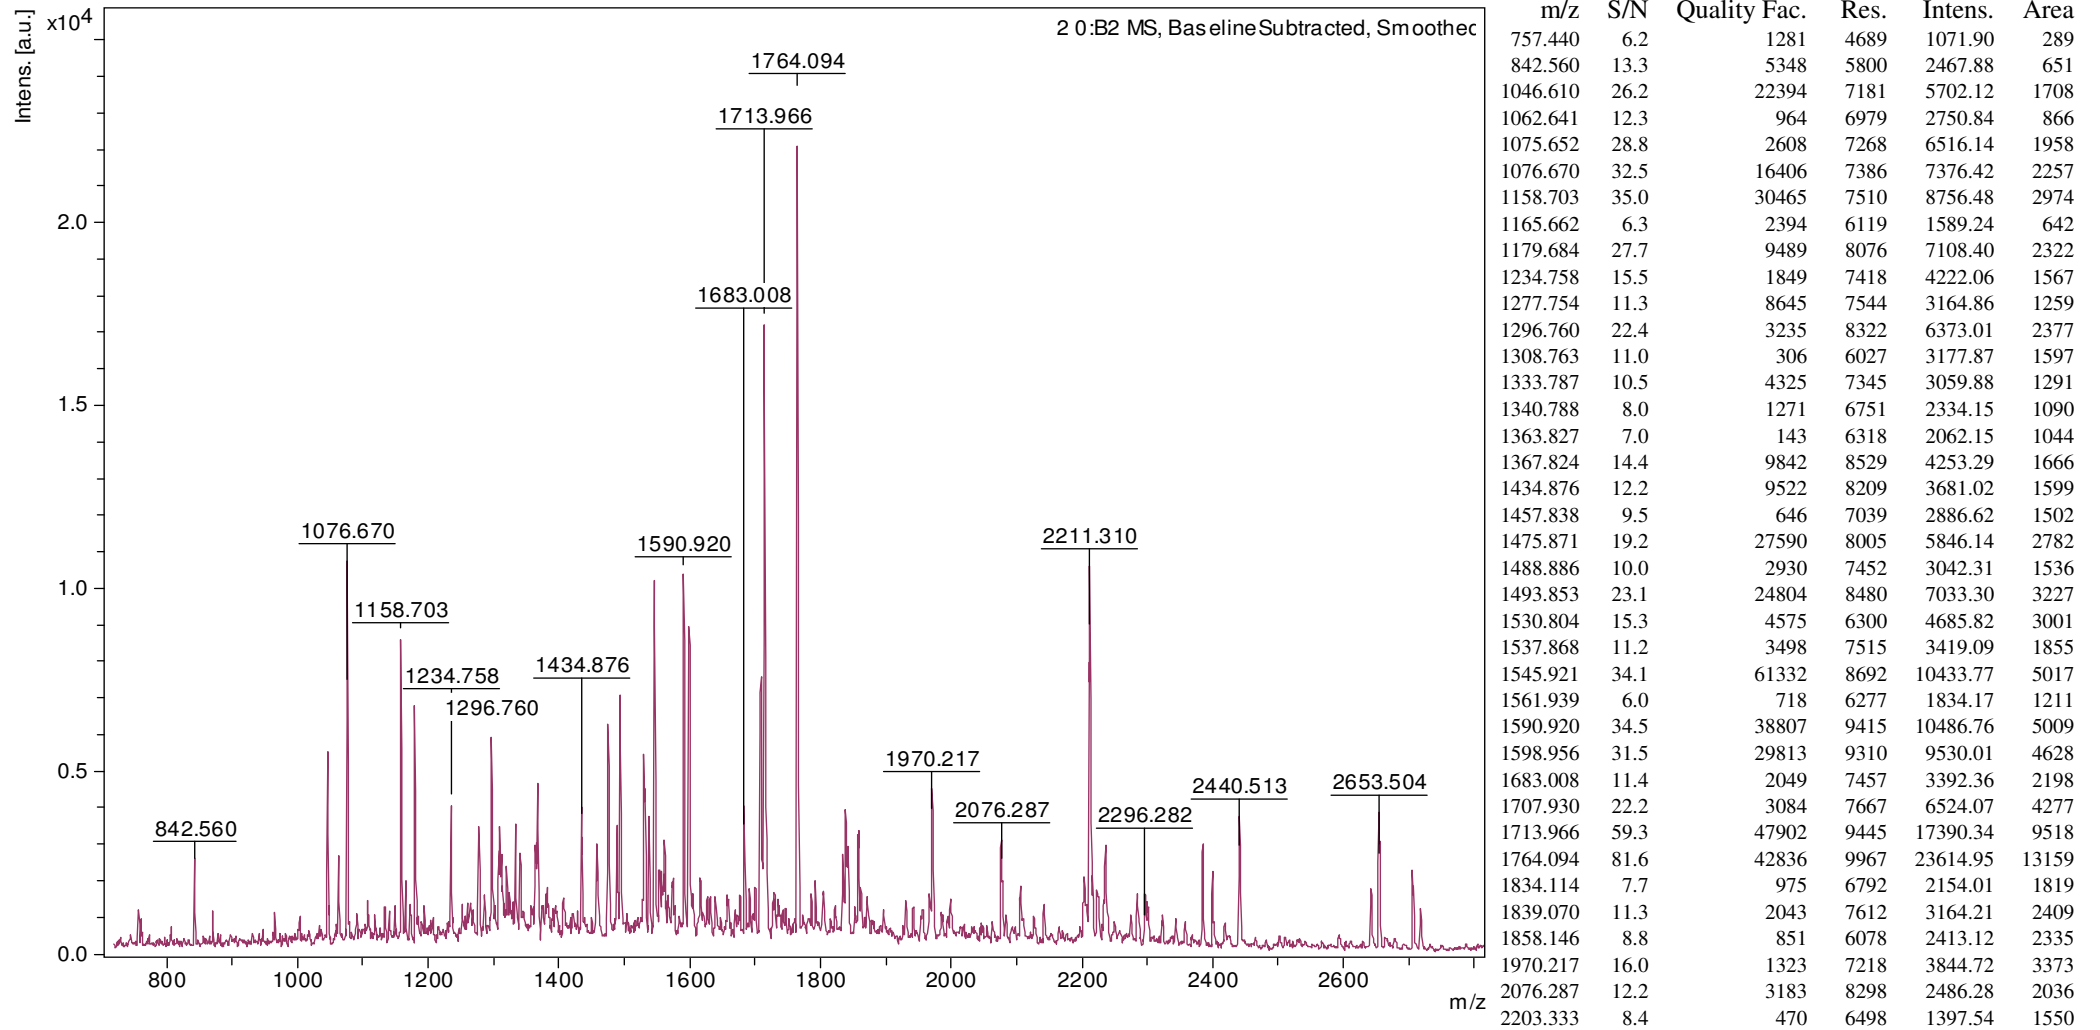

| m/z      | S/N  | Quality Fac. | Res.  | Intens. | Area |
|----------|------|--------------|-------|---------|------|
| 2211.310 | 54.0 | 30739        | 11032 | 8877.64 | 6117 |
| 2222.281 | 6.7  | 434          | 5200  | 1089.65 | 1533 |
| 2235.350 | 9.8  | 527          | 5350  | 1561.60 | 2136 |
| 2284.363 | 6.7  | 1047         | 6973  | 989.46  | 1075 |
| 2296.282 | 6.2  | 365          | 6296  | 904.80  | 1103 |
| 2384.175 | 15.9 | 2328         | 8113  | 2013.83 | 2011 |
| 2399.245 | 11.8 | 2928         | 8185  | 1453.17 | 1460 |
| 2440.513 | 24.6 | 19331        | 10473 | 2835.74 | 2307 |
| 2641.562 | 13.3 | 3177         | 8219  | 1100.17 | 1264 |
| 2653.504 | 32.5 | 35189        | 11398 | 2620.37 | 2224 |
| 2705.380 | 19.5 | 6338         | 9579  | 1424.56 | 1473 |
| 2717.322 | 9.7  | 3543         | 8203  | 700.19  | 854  |


**Mascot Search Results**

User : sanovar  
 Email : sanovar@sandor.co.in  
 Search title :  
 MS data file : DATA.TXT  
 Database : SwissProt 2018\_06 (557713 sequences; 200130199 residues)  
 Taxonomy : Bacteria (Eubacteria) (333552 sequences)  
 Timestamp : 11 Jul 2018 at 11:37:18 GMT  
 Warning : **A Peptide summary report will usually give a much clearer picture of MS/MS search results.**  
 Top Score : 191 for **DLDH\_ECO57**, Dihydrolipoyl dehydrogenase OS=Escherichia coli O157:H7 OX=83334 GN=lpdA PE=3 SV=2

### Mascot Score Histogram

Protein score is  $-10 \cdot \log(P)$ , where P is the probability that the observed match is a random event.

Protein scores greater than 68 are significant ( $p < 0.05$ ).

Protein scores are derived from ions scores as a non-probabilistic basis for ranking protein hits.

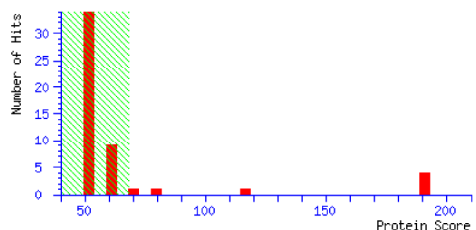

### Protein Summary Report

Format As  [Help](#)  
 Significance threshold  $p <$   Max. number of hits   
 Preferred taxonomy

### Index

| Accession                       | Mass   | Score | Description                                                                                                                           |
|---------------------------------|--------|-------|---------------------------------------------------------------------------------------------------------------------------------------|
| 1. <a href="#">DLDH_ECO57</a>   | 50942  | 191   | Dihydrolipoyl dehydrogenase OS=Escherichia coli O157:H7 OX=83334 GN=lpdA PE=3 SV=2                                                    |
| 2. <a href="#">DLDH_ECOL6</a>   | 50942  | 191   | Dihydrolipoyl dehydrogenase OS=Escherichia coli O6:H1 (strain CFT073 / ATCC 700928 / UPEC) OX=199310 GN=lpdA PE=3 SV=2                |
| 3. <a href="#">DLDH_ECOL1</a>   | 50942  | 191   | Dihydrolipoyl dehydrogenase OS=Escherichia coli (strain K12) OX=83333 GN=lpdA PE=1 SV=2                                               |
| 4. <a href="#">DLDH_SHIFL</a>   | 50942  | 191   | Dihydrolipoyl dehydrogenase OS=Shigella flexneri OX=623 GN=lpdA PE=3 SV=2                                                             |
| 5. <a href="#">DLDH_HAETN</a>   | 51521  | 119   | Dihydrolipoyl dehydrogenase OS=Haemophilus influenzae (strain ATCC 51907 / DSM 11121 / KW20 / Rd) OX=7:7                              |
| 6. <a href="#">AROA_BACLD</a>   | 45722  | 78    | 3-phosphoshikimate 1-carboxyvinyltransferase OS=Bacillus licheniformis (strain ATCC 14580 / DSM 13 / J) OX=1016998 GN=patA            |
| 7. <a href="#">GLMM_COXBN</a>   | 48301  | 69    | Phosphoglucosamine mutase OS=Coxiella burnetii (strain Dugway 5J108-111) OX=434922 GN=glmM PE=3 SV=1                                  |
| 8. <a href="#">GLMM_COXB1</a>   | 48347  | 63    | Phosphoglucosamine mutase OS=Coxiella burnetii (strain CbuK_Q154) OX=434924 GN=glmM PE=3 SV=1                                         |
| 9. <a href="#">GLMM_COXB2</a>   | 48347  | 63    | Phosphoglucosamine mutase OS=Coxiella burnetii (strain CbuG_Q212) OX=434923 GN=glmM PE=3 SV=1                                         |
| 10. <a href="#">TRAA_RHIRD</a>  | 123705 | 61    | Conjugal transfer protein TraA OS=Rhizobium radiobacter OX=358 GN=traA PE=3 SV=1                                                      |
| 11. <a href="#">RPOC2_SYNSC</a> | 148515 | 61    | DNA-directed RNA polymerase subunit beta' OS=Synecococcus sp. (strain CC9605) OX=110662 GN=rpoC2 PE=3 SV=1                            |
| 12. <a href="#">PAT_SALAR</a>   | 50192  | 61    | Putrescine aminotransferase OS=Salmonella arizonae (strain ATCC BAA-731 / CDC346-86 / RSK2980) OX=4151:1                              |
| 13. <a href="#">PAT_SALPB</a>   | 50078  | 61    | Putrescine aminotransferase OS=Salmonella paratyphi B (strain ATCC BAA-1250 / SPB7) OX=1016998 GN=patA                                |
| 14. <a href="#">RPOC2_PROMS</a> | 150243 | 59    | DNA-directed RNA polymerase subunit beta' OS=Prochlorococcus marinus (strain AS9601) OX=146891 GN=rpoC:1                              |
| 15. <a href="#">RPOC2_PROMO</a> | 150258 | 57    | DNA-directed RNA polymerase subunit beta' OS=Prochlorococcus marinus (strain MIT 9301) OX=167546 GN=rpoC:2                            |
| 16. <a href="#">RL9_PARKL</a>   | 16075  | 57    | 50S ribosomal protein L9 OS=Paraburkholderia xenovorans (strain LB400) OX=266265 GN=rplI PE=3 SV=1                                    |
| 17. <a href="#">RL10_THIDA</a>  | 18640  | 56    | 50S ribosomal protein L10 OS=Thiobacillus denitrificans (strain ATCC 25259) OX=292415 GN=rplJ PE=3 SV=1                               |
| 18. <a href="#">EPMA_SALAR</a>  | 37284  | 55    | Elongation factor P--(R)-beta-lysine ligase OS=Salmonella arizonae (strain ATCC BAA-731 / CDC346-86 / 1) OX=4151:1                    |
| 19. <a href="#">IF2_BACFN</a>   | 112675 | 55    | Translation initiation factor IF-2 OS=Bacteroides fragilis (strain ATCC 25285 / DSM 2151 / JCM 11019 / 1) OX=1016998 GN=ifb PE=3 SV=1 |
| 20. <a href="#">IF2_BACFR</a>   | 112675 | 55    | Translation initiation factor IF-2 OS=Bacteroides fragilis (strain YCH46) OX=295405 GN=infB PE=3 SV=1                                 |

### Results List

|                                                                                                                                                                                                                                                                                                                                                                                                                                                                                                                                                                                                                                                                                                                                                                                                                                                                                                                                                                                                                                                          |                            |             |            |                 |            |       |      |      |                                           |
|----------------------------------------------------------------------------------------------------------------------------------------------------------------------------------------------------------------------------------------------------------------------------------------------------------------------------------------------------------------------------------------------------------------------------------------------------------------------------------------------------------------------------------------------------------------------------------------------------------------------------------------------------------------------------------------------------------------------------------------------------------------------------------------------------------------------------------------------------------------------------------------------------------------------------------------------------------------------------------------------------------------------------------------------------------|----------------------------|-------------|------------|-----------------|------------|-------|------|------|-------------------------------------------|
| 1.                                                                                                                                                                                                                                                                                                                                                                                                                                                                                                                                                                                                                                                                                                                                                                                                                                                                                                                                                                                                                                                       | <a href="#">DLDH_ECO57</a> | Mass: 50942 | Score: 191 | Expect: 2.6e-14 | Matches: 8 |       |      |      |                                           |
| Dihydrolipoyl dehydrogenase OS=Escherichia coli O157:H7 OX=83334 GN=lpdA PE=3 SV=2                                                                                                                                                                                                                                                                                                                                                                                                                                                                                                                                                                                                                                                                                                                                                                                                                                                                                                                                                                       |                            |             |            |                 |            |       |      |      |                                           |
|                                                                                                                                                                                                                                                                                                                                                                                                                                                                                                                                                                                                                                                                                                                                                                                                                                                                                                                                                                                                                                                          | Observed                   | Mr(expt)    | Mr(calc)   | ppm             | Start      | End   | Miss | Ions | Peptide                                   |
|                                                                                                                                                                                                                                                                                                                                                                                                                                                                                                                                                                                                                                                                                                                                                                                                                                                                                                                                                                                                                                                          | 758.4449                   | 757.4377    | 757.4446   | -9.19           | 297        | - 302 | 1    | ---  | R.VDKQLR.T                                |
|                                                                                                                                                                                                                                                                                                                                                                                                                                                                                                                                                                                                                                                                                                                                                                                                                                                                                                                                                                                                                                                          | 1076.6699                  | 1075.6627   | 1075.6026  | 55.8            | 264        | - 273 | 0    | ---  | R.YDAVLVAIGR.V                            |
|                                                                                                                                                                                                                                                                                                                                                                                                                                                                                                                                                                                                                                                                                                                                                                                                                                                                                                                                                                                                                                                          | 1333.7866                  | 1332.7793   | 1332.6786  | 75.5            | 285        | - 296 | 1    | ---  | K.AGVEVDVDRGFIR.V                         |
|                                                                                                                                                                                                                                                                                                                                                                                                                                                                                                                                                                                                                                                                                                                                                                                                                                                                                                                                                                                                                                                          | 1367.8244                  | 1366.8172   | 1366.7245  | 67.8            | 68         | - 80  | 0    | ---  | K.ALAEHGIVFGEPK.T                         |
|                                                                                                                                                                                                                                                                                                                                                                                                                                                                                                                                                                                                                                                                                                                                                                                                                                                                                                                                                                                                                                                          | 1713.9658                  | 1712.9585   | 1712.8158  | 83.3            | 371        | - 386 | 0    | 59   | K.GISYETATFPWAASGR.A                      |
|                                                                                                                                                                                                                                                                                                                                                                                                                                                                                                                                                                                                                                                                                                                                                                                                                                                                                                                                                                                                                                                          | 1764.0939                  | 1763.0866   | 1762.9366  | 85.1            | 7          | - 24  | 0    | 103  | K.TQVVVLGAGPAGYSAAFR.C                    |
|                                                                                                                                                                                                                                                                                                                                                                                                                                                                                                                                                                                                                                                                                                                                                                                                                                                                                                                                                                                                                                                          | 2274.3577                  | 2273.3504   | 2273.1991  | 66.6            | 303        | - 323 | 0    | ---  | R.TNVPHIFAIGDIVGQPMIAHK.G + Oxidation (M) |
|                                                                                                                                                                                                                                                                                                                                                                                                                                                                                                                                                                                                                                                                                                                                                                                                                                                                                                                                                                                                                                                          | 2322.3983                  | 2321.3910   | 2321.2379  | 66.0            | 2          | - 24  | 1    | ---  | M.STEIKTQVVVLGAGPAGYSAAFR.C               |
| No match to: 761.4539, 773.4587, 807.4419, 842.5599, 870.5871, 931.5710, 965.5635, 1003.6035, 1046.6100, 1062.6412, 1064.6582, 1075.6517, 1118.6055, 1133.6818, 1140.6556, 1149.6929, 1158.7030, 1165.6616, 1172.7483, 1179.6837, 1234.7577, 1259.7439, 1277.7544, 1285.7582, 1296.7598, 1308.7634, 1320.6892, 1340.7881, 1373.7740, 1390.7958, 1434.8763, 1457.8382, 1475.8714, 1488.8863, 1493.8532, 1530.8044, 1537.8684, 1545.9206, 1553.9584, 1561.9388, 1590.9204, 1598.9555, 1615.9930, 1638.9781, 1657.9450, 1683.0081, 1690.9261, 1699.9587, 1707.9303, 1729.9719, 1786.0298, 1791.8986, 1804.0504, 1822.0336, 1834.1144, 1839.0705, 1842.1348, 1858.1460, 1862.0788, 1930.0964, 1941.1169, 1955.1238, 1970.2165, 1972.1537, 1985.1441, 1998.1688, 2076.2873, 2083.1868, 2105.2985, 2126.2672, 2141.2573, 2164.2353, 2203.3329, 2211.3104, 2215.3655, 2222.2808, 2235.3499, 2284.3628, 2296.2822, 2343.2148, 2357.2678, 2384.1747, 2399.2446, 2418.3632, 2440.5128, 2592.4853, 2641.5621, 2653.5041, 2705.3800, 2717.3219, 2888.5748, 3264.6235 |                            |             |            |                 |            |       |      |      |                                           |
| 2.                                                                                                                                                                                                                                                                                                                                                                                                                                                                                                                                                                                                                                                                                                                                                                                                                                                                                                                                                                                                                                                       | <a href="#">DLDH_ECOL6</a> | Mass: 50942 | Score: 191 | Expect: 2.6e-14 | Matches: 8 |       |      |      |                                           |
| Dihydrolipoyl dehydrogenase OS=Escherichia coli O6:H1 (strain CFT073 / ATCC 700928 / UPEC) OX=199310 GN=lpdA PE=3 SV=2                                                                                                                                                                                                                                                                                                                                                                                                                                                                                                                                                                                                                                                                                                                                                                                                                                                                                                                                   |                            |             |            |                 |            |       |      |      |                                           |
|                                                                                                                                                                                                                                                                                                                                                                                                                                                                                                                                                                                                                                                                                                                                                                                                                                                                                                                                                                                                                                                          | Observed                   | Mr(expt)    | Mr(calc)   | ppm             | Start      | End   | Miss | Ions | Peptide                                   |
|                                                                                                                                                                                                                                                                                                                                                                                                                                                                                                                                                                                                                                                                                                                                                                                                                                                                                                                                                                                                                                                          | 758.4449                   | 757.4377    | 757.4446   | -9.19           | 297        | - 302 | 1    | ---  | R.VDKQLR.T                                |
|                                                                                                                                                                                                                                                                                                                                                                                                                                                                                                                                                                                                                                                                                                                                                                                                                                                                                                                                                                                                                                                          | 1076.6699                  | 1075.6627   | 1075.6026  | 55.8            | 264        | - 273 | 0    | ---  | R.YDAVLVAIGR.V                            |

1333.7866 1332.7793 1332.6786 75.5 285 - 296 1 --- K.AGVEVDDRGFIR.V  
 1367.8244 1366.8172 1366.7245 67.8 68 - 80 0 --- K.ALAEHGIVFGEPEK.T  
 1713.9658 1712.9585 1712.8158 83.3 371 - 386 0 59 K.GISYETATFPWAASGR.A  
 1764.0939 1763.0866 1762.9366 85.1 7 - 24 0 103 K.TQVVVLGAGPAGYSAAFR.C  
 2274.3577 2273.3504 2273.1991 66.6 303 - 323 0 --- R.TNVPHIFAIGDIVQPMLAHK.G + Oxidation (M)  
 2322.3983 2321.3910 2321.2379 66.0 2 - 24 1 --- M.STEIKTQVVVLGAGPAGYSAAFR.C

**No match to:** 761.4539, 773.4587, 807.4419, 842.5599, 870.5871, 931.5710, 965.5635, 1003.6035, 1046.6100, 1062.6412, 1064.6582, 1075.6517, 1118.6055, 1133.6818, 1140.6556, 1149.6929, 1158.7030, 1165.6616, 1172.7483, 1179.6837, 1234.7577, 1259.7439, 1277.7544, 1285.7582, 1296.7598, 1308.7634, 1320.6892, 1340.7881, 1373.7740, 1390.7958, 1434.8763, 1457.8382, 1475.8714, 1488.8863, 1493.8532, 1530.8044, 1537.8684, 1545.9206, 1553.9584, 1561.9388, 1590.9204, 1598.9555, 1615.9930, 1638.9781, 1657.9450, 1683.0081, 1690.9261, 1699.9587, 1707.9303, 1729.9719, 1786.0298, 1791.8986, 1804.0504, 1822.0336, 1834.1144, 1839.0705, 1842.1348, 1858.1460, 1862.0788, 1930.0964, 1941.1169, 1955.1238, 1970.2165, 1972.1537, 1985.1441, 1998.1688, 2076.2873, 2083.1868, 2105.2985, 2126.2672, 2141.2573, 2164.2353, 2203.3329, 2211.3104, 2215.3655, 2222.2808, 2235.3499, 2284.3628, 2296.2822, 2343.2148, 2357.2678, 2384.1747, 2399.2446, 2418.3632, 2440.5128, 2592.4853, 2641.5621, 2653.5041, 2705.3800, 2717.3219, 2888.5748, 3264.6235

3. [DLDH ECOLI](#) **Mass:** 50942 **Score:** 191 **Expect:** 2.6e-14 **Matches:** 8  
 Dihydrolipoyl dehydrogenase OS=Escherichia coli (strain K12) OX=83333 GN=lpdA PE=1 SV=2

| Observed  | Mr (expt) | Mr (calc) | ppm   | Start | End | Miss | Ions | Peptide                                  |
|-----------|-----------|-----------|-------|-------|-----|------|------|------------------------------------------|
| 758.4449  | 757.4377  | 757.4446  | -9.19 | 297   | 302 | 1    | ---  | R.VDKQLR.T                               |
| 1076.6699 | 1075.6627 | 1075.6026 | 55.8  | 264   | 273 | 0    | ---  | R.YDAVLVAIGR.V                           |
| 1333.7866 | 1332.7793 | 1332.6786 | 75.5  | 285   | 296 | 1    | ---  | K.AGVEVDDRGFIR.V                         |
| 1367.8244 | 1366.8172 | 1366.7245 | 67.8  | 68    | 80  | 0    | ---  | K.ALAEHGIVFGEPEK.T                       |
| 1713.9658 | 1712.9585 | 1712.8158 | 83.3  | 371   | 386 | 0    | 59   | K.GISYETATFPWAASGR.A                     |
| 1764.0939 | 1763.0866 | 1762.9366 | 85.1  | 7     | 24  | 0    | 103  | K.TQVVVLGAGPAGYSAAFR.C                   |
| 2274.3577 | 2273.3504 | 2273.1991 | 66.6  | 303   | 323 | 0    | ---  | R.TNVPHIFAIGDIVQPMLAHK.G + Oxidation (M) |
| 2322.3983 | 2321.3910 | 2321.2379 | 66.0  | 2     | 24  | 1    | ---  | M.STEIKTQVVVLGAGPAGYSAAFR.C              |

**No match to:** 761.4539, 773.4587, 807.4419, 842.5599, 870.5871, 931.5710, 965.5635, 1003.6035, 1046.6100, 1062.6412, 1064.6582, 1075.6517, 1118.6055, 1133.6818, 1140.6556, 1149.6929, 1158.7030, 1165.6616, 1172.7483, 1179.6837, 1234.7577, 1259.7439, 1277.7544, 1285.7582, 1296.7598, 1308.7634, 1320.6892, 1340.7881, 1373.7740, 1390.7958, 1434.8763, 1457.8382, 1475.8714, 1488.8863, 1493.8532, 1530.8044, 1537.8684, 1545.9206, 1553.9584, 1561.9388, 1590.9204, 1598.9555, 1615.9930, 1638.9781, 1657.9450, 1683.0081, 1690.9261, 1699.9587, 1707.9303, 1729.9719, 1786.0298, 1791.8986, 1804.0504, 1822.0336, 1834.1144, 1839.0705, 1842.1348, 1858.1460, 1862.0788, 1930.0964, 1941.1169, 1955.1238, 1970.2165, 1972.1537, 1985.1441, 1998.1688, 2076.2873, 2083.1868, 2105.2985, 2126.2672, 2141.2573, 2164.2353, 2203.3329, 2211.3104, 2215.3655, 2222.2808, 2235.3499, 2284.3628, 2296.2822, 2343.2148, 2357.2678, 2384.1747, 2399.2446, 2418.3632, 2440.5128, 2592.4853, 2641.5621, 2653.5041, 2705.3800, 2717.3219, 2888.5748, 3264.6235

4. [DLDH SHIFL](#) **Mass:** 50942 **Score:** 191 **Expect:** 2.6e-14 **Matches:** 8  
 Dihydrolipoyl dehydrogenase OS=Shigella flexneri OX=623 GN=lpdA PE=3 SV=2

| Observed  | Mr (expt) | Mr (calc) | ppm   | Start | End | Miss | Ions | Peptide                                  |
|-----------|-----------|-----------|-------|-------|-----|------|------|------------------------------------------|
| 758.4449  | 757.4377  | 757.4446  | -9.19 | 297   | 302 | 1    | ---  | R.VDKQLR.T                               |
| 1076.6699 | 1075.6627 | 1075.6026 | 55.8  | 264   | 273 | 0    | ---  | R.YDAVLVAIGR.V                           |
| 1333.7866 | 1332.7793 | 1332.6786 | 75.5  | 285   | 296 | 1    | ---  | K.AGVEVDDRGFIR.V                         |
| 1367.8244 | 1366.8172 | 1366.7245 | 67.8  | 68    | 80  | 0    | ---  | K.ALAEHGIVFGEPEK.T                       |
| 1713.9658 | 1712.9585 | 1712.8158 | 83.3  | 371   | 386 | 0    | 59   | K.GISYETATFPWAASGR.A                     |
| 1764.0939 | 1763.0866 | 1762.9366 | 85.1  | 7     | 24  | 0    | 103  | K.TQVVVLGAGPAGYSAAFR.C                   |
| 2274.3577 | 2273.3504 | 2273.1991 | 66.6  | 303   | 323 | 0    | ---  | R.TNVPHIFAIGDIVQPMLAHK.G + Oxidation (M) |
| 2322.3983 | 2321.3910 | 2321.2379 | 66.0  | 2     | 24  | 1    | ---  | M.STEIKTQVVVLGAGPAGYSAAFR.C              |

**No match to:** 761.4539, 773.4587, 807.4419, 842.5599, 870.5871, 931.5710, 965.5635, 1003.6035, 1046.6100, 1062.6412, 1064.6582, 1075.6517, 1118.6055, 1133.6818, 1140.6556, 1149.6929, 1158.7030, 1165.6616, 1172.7483, 1179.6837, 1234.7577, 1259.7439, 1277.7544, 1285.7582, 1296.7598, 1308.7634, 1320.6892, 1340.7881, 1373.7740, 1390.7958, 1434.8763, 1457.8382, 1475.8714, 1488.8863, 1493.8532, 1530.8044, 1537.8684, 1545.9206, 1553.9584, 1561.9388, 1590.9204, 1598.9555, 1615.9930, 1638.9781, 1657.9450, 1683.0081, 1690.9261, 1699.9587, 1707.9303, 1729.9719, 1786.0298, 1791.8986, 1804.0504, 1822.0336, 1834.1144, 1839.0705, 1842.1348, 1858.1460, 1862.0788, 1930.0964, 1941.1169, 1955.1238, 1970.2165, 1972.1537, 1985.1441, 1998.1688, 2076.2873, 2083.1868, 2105.2985, 2126.2672, 2141.2573, 2164.2353, 2203.3329, 2211.3104, 2215.3655, 2222.2808, 2235.3499, 2284.3628, 2296.2822, 2343.2148, 2357.2678, 2384.1747, 2399.2446, 2418.3632, 2440.5128, 2592.4853, 2641.5621, 2653.5041, 2705.3800, 2717.3219, 2888.5748, 3264.6235

5. [DLDH HAERIN](#) **Mass:** 51521 **Score:** 119 **Expect:** 4.2e-07 **Matches:** 5  
 Dihydrolipoyl dehydrogenase OS=Haemophilus influenzae (strain ATCC 51907 / DSM 11121 / KW20 / Rd) OX=71421 GN=lpdA PE=3 SV=2

| Observed  | Mr (expt) | Mr (calc) | ppm   | Start | End | Miss | Ions | Peptide                                     |
|-----------|-----------|-----------|-------|-------|-----|------|------|---------------------------------------------|
| 1076.6699 | 1075.6627 | 1075.6026 | 55.8  | 264   | 273 | 0    | ---  | R.YDAVLVAIGR.V                              |
| 1457.8382 | 1456.8309 | 1456.7522 | 54.1  | 279   | 292 | 1    | ---  | K.LIDAGKAGVEVDDR.G                          |
| 1764.0939 | 1763.0866 | 1762.9366 | 85.1  | 7     | 24  | 0    | 103  | K.TQVVVLGAGPAGYSAAFR.C                      |
| 2274.3577 | 2273.3504 | 2273.1991 | 66.6  | 303   | 323 | 0    | ---  | R.TNVPHIFAIGDIVQPMLAHK.G                    |
| 2705.3800 | 2704.3728 | 2704.3941 | -7.90 | 300   | 323 | 1    | ---  | K.QMRPNVPHIFAIGDIVQPMLAHK.G + Oxidation (M) |

**No match to:** 758.4449, 761.4539, 773.4587, 807.4419, 842.5599, 870.5871, 931.5710, 965.5635, 1003.6035, 1046.6100, 1062.6412, 1064.6582, 1075.6517, 1118.6055, 1133.6818, 1140.6556, 1149.6929, 1158.7030, 1165.6616, 1172.7483, 1179.6837, 1234.7577, 1259.7439, 1277.7544, 1285.7582, 1296.7598, 1308.7634, 1320.6892, 1340.7881, 1373.7740, 1390.7958, 1434.8763, 1457.8382, 1475.8714, 1488.8863, 1493.8532, 1530.8044, 1537.8684, 1545.9206, 1553.9584, 1561.9388, 1590.9204, 1598.9555, 1615.9930, 1638.9781, 1657.9450, 1683.0081, 1690.9261, 1699.9587, 1707.9303, 1729.9719, 1786.0298, 1791.8986, 1804.0504, 1822.0336, 1834.1144, 1839.0705, 1842.1348, 1858.1460, 1862.0788, 1930.0964, 1941.1169, 1955.1238, 1970.2165, 1972.1537, 1985.1441, 1998.1688, 2076.2873, 2083.1868, 2105.2985, 2126.2672, 2141.2573, 2164.2353, 2203.3329, 2211.3104, 2215.3655, 2222.2808, 2235.3499, 2284.3628, 2296.2822, 2343.2148, 2357.2678, 2384.1747, 2399.2446, 2418.3632, 2440.5128, 2592.4853, 2641.5621, 2653.5041, 2717.3219, 2888.5748, 3264.6235

6. [AROA BACLD](#) **Mass:** 45722 **Score:** 78 **Expect:** 0.0058 **Matches:** 14  
 3-phosphoshikimate 1-carboxyvinyltransferase OS=Bacillus licheniformis (strain ATCC 14580 / DSM 13 / JCM 2505 / NBRC 12200 / NCI

| Observed  | Mr (expt) | Mr (calc) | ppm    | Start | End | Miss | Ions | Peptide                                     |
|-----------|-----------|-----------|--------|-------|-----|------|------|---------------------------------------------|
| 842.5599  | 841.5527  | 841.5021  | 60.0   | 124   | 130 | 1    | ---  | R.VTEPLRK.M                                 |
| 870.5871  | 869.5798  | 869.5083  | 82.2   | 123   | 129 | 1    | ---  | K.RVTEPLR.K                                 |
| 965.5635  | 964.5563  | 964.4978  | 60.6   | 11    | 19  | 0    | ---  | K.GELHIPGDK.S                               |
| 1140.6556 | 1139.6483 | 1139.5831 | 57.2   | 197   | 206 | 0    | ---  | R.LMSFMFVSLR.E                              |
| 1149.6929 | 1148.6856 | 1148.5826 | 89.7   | 139   | 149 | 0    | ---  | R.AGGEYTPLSVR.G                             |
| 1179.6837 | 1178.6765 | 1178.6772 | -0.58  | 367   | 378 | 1    | ---  | K.IHGKTPLTGGAK.V                            |
| 1475.8714 | 1474.8641 | 1474.7627 | 68.8   | 340   | 352 | 1    | ---  | K.ETNRIDTVAELK.K                            |
| 1493.8532 | 1492.8459 | 1492.8249 | 14.1   | 6     | 19  | 1    | ---  | K.ISSLKELHIPGDK.S                           |
| 1545.9206 | 1544.9134 | 1544.8059 | 69.5   | 11    | 24  | 1    | 7    | K.GELHIPGDKSISHR.S                          |
| 1590.9204 | 1589.9131 | 1589.8162 | 61.0   | 135   | 149 | 1    | ---  | K.IDRAGGEYTPLSVR.G                          |
| 1657.9450 | 1656.9377 | 1656.9046 | 20.0   | 294   | 309 | 1    | ---  | K.TSSLKAAEISGLDIPR.L                        |
| 1707.9303 | 1706.9230 | 1706.8232 | 58.5   | 20    | 35  | 1    | ---  | K.SISHRVFMFGAMAEK.T                         |
| 2322.3983 | 2321.3910 | 2321.3457 | 19.5   | 310   | 331 | 0    | ---  | R.LIDEIPILALLATQAEGTTPVIK.D                 |
| 2399.2446 | 2398.2373 | 2398.2679 | -12.74 | 96    | 118 | 0    | ---  | R.LMLGILAGRPFHSTVAGDESIAR.K + Oxidation (M) |

**No match to:** 758.4449, 761.4539, 773.4587, 807.4419, 931.5710, 1003.6035, 1046.6100, 1062.6412, 1064.6582, 1075.6517, 1076.6699, 1118.6055, 1133.6818, 1158.7030, 1165.6616, 1172.7483, 1234.7577, 1259.7439, 1277.7544, 1285.7582, 1296.7598,

1308.7634, 1320.6892, 1333.7866, 1340.7881, 1367.8244, 1373.7740, 1390.7958, 1434.8763, 1457.8382, 1488.8863, 1530.8044, 1537.8684, 1553.9584, 1561.9388, 1598.9555, 1615.9930, 1638.9781, 1683.0081, 1690.9261, 1699.9587, 1713.9658, 1729.9719, 1764.0939, 1786.0298, 1791.8986, 1804.0504, 1822.0336, 1834.1144, 1839.0705, 1842.1348, 1858.1460, 1862.0788, 1930.0964, 1941.1169, 1955.1238, 1970.2165, 1972.1537, 1985.1441, 1998.1688, 2076.2873, 2083.1868, 2105.2985, 2126.2672, 2141.2573, 2164.2353, 2203.3329, 2211.3104, 2215.3655, 2222.2808, 2235.3499, 2274.3577, 2284.3628, 2296.2822, 2343.2148, 2357.2678, 2384.1747, 2418.3632, 2440.5128, 2592.4853, 2641.5621, 2653.5041, 2705.3800, 2717.3219, 2888.5748, 3264.6235

7. [GLMM COXBN](#) Mass: 48301 Score: 69 Expect: 0.046 Matches: 9

Phosphoglucosamine mutase OS=Coxiella burnetii (strain Dugway 5J108-111) OX=434922 GN=glmM PE=3 SV=1

| Observed                                                                                                                                                                                                                                                                                                                                                                                                                                                                                                                                                                                                                                                                                                                                                                                                                                                                                                                                                                                                                                              | Mr (expt) | Mr (calc) | ppm    | Start | End | Miss | Ions | Peptide                             |
|-------------------------------------------------------------------------------------------------------------------------------------------------------------------------------------------------------------------------------------------------------------------------------------------------------------------------------------------------------------------------------------------------------------------------------------------------------------------------------------------------------------------------------------------------------------------------------------------------------------------------------------------------------------------------------------------------------------------------------------------------------------------------------------------------------------------------------------------------------------------------------------------------------------------------------------------------------------------------------------------------------------------------------------------------------|-----------|-----------|--------|-------|-----|------|------|-------------------------------------|
| 758.4449                                                                                                                                                                                                                                                                                                                                                                                                                                                                                                                                                                                                                                                                                                                                                                                                                                                                                                                                                                                                                                              | 757.4377  | 757.4235  | 18.7   | 28    | 34  | 0    | ---  | K.LGWAVGR.V                         |
| 761.4539                                                                                                                                                                                                                                                                                                                                                                                                                                                                                                                                                                                                                                                                                                                                                                                                                                                                                                                                                                                                                                              | 760.4466  | 760.3967  | 65.7   | 393   | 399 | 0    | ---  | K.AITEAEK.Q                         |
| 1234.7577                                                                                                                                                                                                                                                                                                                                                                                                                                                                                                                                                                                                                                                                                                                                                                                                                                                                                                                                                                                                                                             | 1233.7504 | 1233.7445 | 4.81   | 369   | 379 | 0    | ---  | K.NPQVLINVPIK.G                     |
| 1259.7439                                                                                                                                                                                                                                                                                                                                                                                                                                                                                                                                                                                                                                                                                                                                                                                                                                                                                                                                                                                                                                             | 1258.7367 | 1258.6656 | 56.5   | 120   | 130 | 0    | ---  | K.LSDELELAIEK.Q                     |
| 1457.8382                                                                                                                                                                                                                                                                                                                                                                                                                                                                                                                                                                                                                                                                                                                                                                                                                                                                                                                                                                                                                                             | 1456.8309 | 1456.7634 | 46.4   | 393   | 406 | 1    | ---  | K.AITEAEKQLNGAGR.I                  |
| 1561.9388                                                                                                                                                                                                                                                                                                                                                                                                                                                                                                                                                                                                                                                                                                                                                                                                                                                                                                                                                                                                                                             | 1560.9315 | 1560.7817 | 96.0   | 432   | 446 | 0    | 31   | R.QTAEMLAIAAVVQSTL.-                |
| 1707.9303                                                                                                                                                                                                                                                                                                                                                                                                                                                                                                                                                                                                                                                                                                                                                                                                                                                                                                                                                                                                                                             | 1706.9230 | 1707.0117 | -51.96 | 365   | 379 | 1    | ---  | K.VMVKNPQVLINVPIK.G + Oxidation (M) |
| 2284.3628                                                                                                                                                                                                                                                                                                                                                                                                                                                                                                                                                                                                                                                                                                                                                                                                                                                                                                                                                                                                                                             | 2283.3555 | 2283.2144 | 61.8   | 274   | 295 | 0    | ---  | K.ENAPLGVVGTIMSNTLGLQTLK.R          |
| 2440.5128                                                                                                                                                                                                                                                                                                                                                                                                                                                                                                                                                                                                                                                                                                                                                                                                                                                                                                                                                                                                                                             | 2439.5056 | 2439.3155 | 77.9   | 274   | 296 | 1    | ---  | K.ENAPLGVVGTIMSNTLGLQTLKR.H         |
| <b>No match to:</b> 773.4587, 807.4419, 842.5599, 870.5871, 931.5710, 965.5635, 1003.6035, 1046.6100, 1062.6412, 1064.6582, 1075.6517, 1076.6699, 1118.6055, 1133.6818, 1140.6556, 1149.6929, 1158.7030, 1165.6616, 1172.7483, 1179.6837, 1277.7544, 1285.7582, 1296.7598, 1308.7634, 1320.6892, 1333.7866, 1340.7881, 1367.8244, 1373.7740, 1390.7958, 1434.8763, 1475.8714, 1488.8863, 1493.8532, 1530.8044, 1537.8684, 1545.9206, 1553.9584, 1590.9204, 1598.9555, 1615.9930, 1638.9781, 1657.9450, 1683.0081, 1690.9261, 1699.9587, 1713.9658, 1729.9719, 1764.0939, 1786.0298, 1791.8986, 1804.0504, 1822.0336, 1834.1144, 1839.0705, 1842.1348, 1858.1460, 1862.0788, 1930.0964, 1941.1169, 1955.1238, 1970.2165, 1972.1537, 1985.1441, 1998.1688, 2076.2873, 2083.1868, 2105.2985, 2126.2672, 2141.2573, 2164.2353, 2203.3329, 2211.3104, 2215.3655, 2222.2808, 2235.3499, 2274.3577, 2296.2822, 2322.3983, 2343.2148, 2357.2678, 2384.1747, 2399.2446, 2418.3632, 2592.4853, 2641.5621, 2653.5041, 2705.3800, 2717.3219, 2888.5748, 3264.6235 |           |           |        |       |     |      |      |                                     |

8. [GLMM COXB1](#) Mass: 48347 Score: 63 Expect: 0.18 Matches: 8

Phosphoglucosamine mutase OS=Coxiella burnetii (strain CbuK\_Q154) OX=434924 GN=glmM PE=3 SV=1

| Observed                                                                                                                                                                                                                                                                                                                                                                                                                                                                                                                                                                                                                                                                                                                                                                                                                                                                                                                                                                                                                                                         | Mr (expt) | Mr (calc) | ppm  | Start | End | Miss | Ions | Peptide                                 |
|------------------------------------------------------------------------------------------------------------------------------------------------------------------------------------------------------------------------------------------------------------------------------------------------------------------------------------------------------------------------------------------------------------------------------------------------------------------------------------------------------------------------------------------------------------------------------------------------------------------------------------------------------------------------------------------------------------------------------------------------------------------------------------------------------------------------------------------------------------------------------------------------------------------------------------------------------------------------------------------------------------------------------------------------------------------|-----------|-----------|------|-------|-----|------|------|-----------------------------------------|
| 758.4449                                                                                                                                                                                                                                                                                                                                                                                                                                                                                                                                                                                                                                                                                                                                                                                                                                                                                                                                                                                                                                                         | 757.4377  | 757.4235  | 18.7 | 28    | 34  | 0    | ---  | K.LGWAVGR.V                             |
| 761.4539                                                                                                                                                                                                                                                                                                                                                                                                                                                                                                                                                                                                                                                                                                                                                                                                                                                                                                                                                                                                                                                         | 760.4466  | 760.3967  | 65.7 | 393   | 399 | 0    | ---  | K.AITEAEK.Q                             |
| 1259.7439                                                                                                                                                                                                                                                                                                                                                                                                                                                                                                                                                                                                                                                                                                                                                                                                                                                                                                                                                                                                                                                        | 1258.7367 | 1258.6656 | 56.5 | 120   | 130 | 0    | ---  | K.LSDELELAIEK.Q                         |
| 1457.8382                                                                                                                                                                                                                                                                                                                                                                                                                                                                                                                                                                                                                                                                                                                                                                                                                                                                                                                                                                                                                                                        | 1456.8309 | 1456.7634 | 46.4 | 393   | 406 | 1    | ---  | K.AITEAEKQLNGAGR.I                      |
| 1561.9388                                                                                                                                                                                                                                                                                                                                                                                                                                                                                                                                                                                                                                                                                                                                                                                                                                                                                                                                                                                                                                                        | 1560.9315 | 1560.7817 | 96.0 | 432   | 446 | 0    | 31   | R.QTAEMLAIAAVVQSTL.-                    |
| 1941.1169                                                                                                                                                                                                                                                                                                                                                                                                                                                                                                                                                                                                                                                                                                                                                                                                                                                                                                                                                                                                                                                        | 1940.1096 | 1940.0190 | 46.7 | 74    | 91  | 0    | ---  | K.LTGPMPPTPAIAYLTHSVR.A + Oxidation (M) |
| 2284.3628                                                                                                                                                                                                                                                                                                                                                                                                                                                                                                                                                                                                                                                                                                                                                                                                                                                                                                                                                                                                                                                        | 2283.3555 | 2283.2144 | 61.8 | 274   | 295 | 0    | ---  | K.ENAPLGVVGTIMSNTLGLQTLK.R              |
| 2440.5128                                                                                                                                                                                                                                                                                                                                                                                                                                                                                                                                                                                                                                                                                                                                                                                                                                                                                                                                                                                                                                                        | 2439.5056 | 2439.3155 | 77.9 | 274   | 296 | 1    | ---  | K.ENAPLGVVGTIMSNTLGLQTLKR.H             |
| <b>No match to:</b> 773.4587, 807.4419, 842.5599, 870.5871, 931.5710, 965.5635, 1003.6035, 1046.6100, 1062.6412, 1064.6582, 1075.6517, 1076.6699, 1118.6055, 1133.6818, 1140.6556, 1149.6929, 1158.7030, 1165.6616, 1172.7483, 1179.6837, 1234.7577, 1277.7544, 1285.7582, 1296.7598, 1308.7634, 1320.6892, 1333.7866, 1340.7881, 1367.8244, 1373.7740, 1390.7958, 1434.8763, 1475.8714, 1488.8863, 1493.8532, 1530.8044, 1537.8684, 1545.9206, 1553.9584, 1590.9204, 1598.9555, 1615.9930, 1638.9781, 1657.9450, 1683.0081, 1690.9261, 1699.9587, 1707.9303, 1713.9658, 1729.9719, 1764.0939, 1786.0298, 1791.8986, 1804.0504, 1822.0336, 1834.1144, 1839.0705, 1842.1348, 1858.1460, 1862.0788, 1930.0964, 1955.1238, 1970.2165, 1972.1537, 1985.1441, 1998.1688, 2076.2873, 2083.1868, 2105.2985, 2126.2672, 2141.2573, 2164.2353, 2203.3329, 2211.3104, 2215.3655, 2222.2808, 2235.3499, 2274.3577, 2296.2822, 2322.3983, 2343.2148, 2357.2678, 2384.1747, 2399.2446, 2418.3632, 2592.4853, 2641.5621, 2653.5041, 2705.3800, 2717.3219, 2888.5748, 3264.6235 |           |           |      |       |     |      |      |                                         |

9. [GLMM COXB2](#) Mass: 48347 Score: 63 Expect: 0.18 Matches: 8

Phosphoglucosamine mutase OS=Coxiella burnetii (strain CbuQ\_Q212) OX=434923 GN=glmM PE=3 SV=1

| Observed                                                                                                                                                                                                                                                                                                                                                                                                                                                                                                                                                                                                                                                                                                                                                                                                                                                                                                                                                                                                                                                         | Mr (expt) | Mr (calc) | ppm  | Start | End | Miss | Ions | Peptide                                 |
|------------------------------------------------------------------------------------------------------------------------------------------------------------------------------------------------------------------------------------------------------------------------------------------------------------------------------------------------------------------------------------------------------------------------------------------------------------------------------------------------------------------------------------------------------------------------------------------------------------------------------------------------------------------------------------------------------------------------------------------------------------------------------------------------------------------------------------------------------------------------------------------------------------------------------------------------------------------------------------------------------------------------------------------------------------------|-----------|-----------|------|-------|-----|------|------|-----------------------------------------|
| 758.4449                                                                                                                                                                                                                                                                                                                                                                                                                                                                                                                                                                                                                                                                                                                                                                                                                                                                                                                                                                                                                                                         | 757.4377  | 757.4235  | 18.7 | 28    | 34  | 0    | ---  | K.LGWAVGR.V                             |
| 761.4539                                                                                                                                                                                                                                                                                                                                                                                                                                                                                                                                                                                                                                                                                                                                                                                                                                                                                                                                                                                                                                                         | 760.4466  | 760.3967  | 65.7 | 393   | 399 | 0    | ---  | K.AITEAEK.Q                             |
| 1259.7439                                                                                                                                                                                                                                                                                                                                                                                                                                                                                                                                                                                                                                                                                                                                                                                                                                                                                                                                                                                                                                                        | 1258.7367 | 1258.6656 | 56.5 | 120   | 130 | 0    | ---  | K.LSDELELAIEK.Q                         |
| 1457.8382                                                                                                                                                                                                                                                                                                                                                                                                                                                                                                                                                                                                                                                                                                                                                                                                                                                                                                                                                                                                                                                        | 1456.8309 | 1456.7634 | 46.4 | 393   | 406 | 1    | ---  | K.AITEAEKQLNGAGR.I                      |
| 1561.9388                                                                                                                                                                                                                                                                                                                                                                                                                                                                                                                                                                                                                                                                                                                                                                                                                                                                                                                                                                                                                                                        | 1560.9315 | 1560.7817 | 96.0 | 432   | 446 | 0    | 31   | R.QTAEMLAIAAVVQSTL.-                    |
| 1941.1169                                                                                                                                                                                                                                                                                                                                                                                                                                                                                                                                                                                                                                                                                                                                                                                                                                                                                                                                                                                                                                                        | 1940.1096 | 1940.0190 | 46.7 | 74    | 91  | 0    | ---  | K.LTGPMPPTPAIAYLTHSVR.A + Oxidation (M) |
| 2284.3628                                                                                                                                                                                                                                                                                                                                                                                                                                                                                                                                                                                                                                                                                                                                                                                                                                                                                                                                                                                                                                                        | 2283.3555 | 2283.2144 | 61.8 | 274   | 295 | 0    | ---  | K.ENAPLGVVGTIMSNTLGLQTLK.R              |
| 2440.5128                                                                                                                                                                                                                                                                                                                                                                                                                                                                                                                                                                                                                                                                                                                                                                                                                                                                                                                                                                                                                                                        | 2439.5056 | 2439.3155 | 77.9 | 274   | 296 | 1    | ---  | K.ENAPLGVVGTIMSNTLGLQTLKR.H             |
| <b>No match to:</b> 773.4587, 807.4419, 842.5599, 870.5871, 931.5710, 965.5635, 1003.6035, 1046.6100, 1062.6412, 1064.6582, 1075.6517, 1076.6699, 1118.6055, 1133.6818, 1140.6556, 1149.6929, 1158.7030, 1165.6616, 1172.7483, 1179.6837, 1234.7577, 1277.7544, 1285.7582, 1296.7598, 1308.7634, 1320.6892, 1333.7866, 1340.7881, 1367.8244, 1373.7740, 1390.7958, 1434.8763, 1475.8714, 1488.8863, 1493.8532, 1530.8044, 1537.8684, 1545.9206, 1553.9584, 1590.9204, 1598.9555, 1615.9930, 1638.9781, 1657.9450, 1683.0081, 1690.9261, 1699.9587, 1707.9303, 1713.9658, 1729.9719, 1764.0939, 1786.0298, 1791.8986, 1804.0504, 1822.0336, 1834.1144, 1839.0705, 1842.1348, 1858.1460, 1862.0788, 1930.0964, 1955.1238, 1970.2165, 1972.1537, 1985.1441, 1998.1688, 2076.2873, 2083.1868, 2105.2985, 2126.2672, 2141.2573, 2164.2353, 2203.3329, 2211.3104, 2215.3655, 2222.2808, 2235.3499, 2274.3577, 2296.2822, 2322.3983, 2343.2148, 2357.2678, 2384.1747, 2399.2446, 2418.3632, 2592.4853, 2641.5621, 2653.5041, 2705.3800, 2717.3219, 2888.5748, 3264.6235 |           |           |      |       |     |      |      |                                         |

10. [TRAA RHIRD](#) Mass: 123705 Score: 61 Expect: 0.25 Matches: 20

Conjugal transfer protein TraA OS=Rhizobium radiobacter OX=358 GN=traA PE=3 SV=1

| Observed  | Mr (expt) | Mr (calc) | ppm    | Start | End  | Miss | Ions | Peptide                             |
|-----------|-----------|-----------|--------|-------|------|------|------|-------------------------------------|
| 773.4587  | 772.4514  | 772.4443  | 9.23   | 611   | 616  | 1    | ---  | R.EKLVER.G                          |
| 807.4419  | 806.4346  | 806.3956  | 48.3   | 348   | 354  | 0    | ---  | R.LEATMAR.Q + Oxidation (M)         |
| 931.5710  | 930.5638  | 930.4771  | 93.2   | 462   | 469  | 1    | ---  | R.GRDLDDK.T                         |
| 965.5635  | 964.5563  | 964.5342  | 22.9   | 18    | 26   | 0    | ---  | R.SVLSAAYR.H                        |
| 1118.6055 | 1117.5982 | 1117.5339 | 57.6   | 617   | 626  | 0    | ---  | R.GMVGEGLFR.T + Oxidation (M)       |
| 1165.6616 | 1164.6543 | 1164.5775 | 66.0   | 286   | 295  | 1    | ---  | K.SVFDERDVK.V                       |
| 1234.7577 | 1233.7504 | 1233.6354 | 93.3   | 366   | 377  | 0    | ---  | R.GVSPALDALTFR.R                    |
| 1367.8244 | 1366.8172 | 1366.7569 | 44.1   | 161   | 173  | 1    | ---  | K.KVAVIGEDGGPVR.T                   |
| 1373.7740 | 1372.7668 | 1372.7059 | 44.4   | 960   | 970  | 1    | ---  | R.LQTDEQSLRQ.V                      |
| 1390.7958 | 1389.7885 | 1389.7365 | 37.5   | 366   | 378  | 1    | ---  | R.GVSPALDALTFR.H                    |
| 1488.8863 | 1487.8790 | 1487.7732 | 71.1   | 996   | 1009 | 0    | ---  | R.NDLPAAIAYALSNR.E                  |
| 1537.8684 | 1536.8611 | 1536.7719 | 58.1   | 484   | 498  | 1    | ---  | K.QMAGFVDTAVRAGAK.I + Oxidation (M) |
| 1615.9930 | 1614.9858 | 1614.8590 | 78.5   | 2     | 17   | 1    | ---  | M.AIAHFSAIVSRGSGR.S                 |
| 1764.0939 | 1763.0866 | 1762.9254 | 91.5   | 46    | 61   | 0    | 14   | K.QGLLHEEFVLPADAPK.W                |
| 1791.8986 | 1790.8913 | 1790.9275 | -20.19 | 382   | 398  | 1    | ---  | R.LSDEKAAIIEHVAGPAR.I               |
| 1804.0504 | 1803.0431 | 1802.9122 | 72.6   | 954   | 968  | 1    | ---  | R.ETVTQRQLTDEQSLR.Q                 |
| 1822.0336 | 1821.0263 | 1821.0723 | -25.28 | 270   | 285  | 1    | ---  | R.ILNFPAILVDLITREK.S                |
| 1842.1348 | 1841.1275 | 1841.0271 | 54.5   | 202   | 218  | 1    | ---  | R.LNHHLLGGIDKIDGR.S                 |
| 2126.2672 | 2125.2599 | 2125.1068 | 72.0   | 416   | 436  | 1    | ---  | K.AAREAWELAGYHVVGALACK.A            |
| 2284.3628 | 2283.3555 | 2283.1535 | 88.5   | 176   | 195  | 1    | ---  | K.SGKILYELWAGSTDDFNVLR.D            |

No match to: 758.4449, 761.4539, 842.5599, 870.5871, 1003.6035, 1046.6100, 1062.6412, 1064.6582, 1075.6517, 1076.6699, 1133.6818, 1140.6556, 1149.6929, 1158.7030, 1172.7483, 1179.6837, 1259.7439, 1277.7544, 1285.7582, 1296.7598, 1308.7634, 1320.6892, 1333.7866, 1340.7881, 1434.8763, 1457.8382, 1475.8714, 1493.8532, 1530.8044, 1545.9206, 1553.9584, 1561.9388, 1590.9204, 1598.9555, 1638.9781, 1657.9450, 1683.0081, 1690.9261, 1699.9587, 1707.9303, 1713.9658, 1729.9719, 1786.0298, 1834.1144, 1839.0705, 1858.1460, 1862.0788, 1900.0964, 1941.1169, 1955.1238, 1970.2165, 1972.1537, 1985.1441, 1998.1688, 2076.2873, 2083.1868, 2105.2985, 2141.2573, 2164.2353, 2203.3329, 2211.3104, 2215.3655, 2222.2808, 2235.3499, 2274.3577, 2296.2822, 2322.3983, 2343.2148, 2357.2678, 2384.1747, 2399.2446, 2418.3632, 2440.5128, 2592.4853, 2641.5621, 2653.5041, 2705.3800, 2717.3219, 2888.5748, 3264.6235

11. **RPOC2\_SYNSC** Mass: 148515 Score: 61 Expect: 0.25 Matches: 18

DNA-directed RNA polymerase subunit beta' OS=Synecococcus sp. (strain CC9605) OX=110662 GN=rpoC2 PE=3 SV=1

| Observed  | Mr(expt)  | Mr(calc)  | ppm    | Start | End | Miss | Ions | Peptide                                           |
|-----------|-----------|-----------|--------|-------|-----|------|------|---------------------------------------------------|
| 773.4587  | 772.4514  | 772.4443  | 9.21   | 488   | -   | 494  | 0    | R.QGNITLK.A                                       |
| 807.4419  | 806.4346  | 806.3705  | 79.5   | 166   | -   | 172  | 0    | R.GNMSQVR.Q + Oxidation (M)                       |
| 1165.6616 | 1164.6543 | 1164.5887 | 56.3   | 538   | -   | 547  | 1    | R.SEYGGVRLR.D                                     |
| 1259.7439 | 1258.7367 | 1258.6816 | 43.8   | 1024  | -   | 1033 | 1    | R.RPRESTILCK.K                                    |
| 1320.6892 | 1319.6820 | 1319.7197 | -28.63 | 298   | -   | 310  | 1    | K.SFEAAGVKAVSR.S                                  |
| 1333.7866 | 1332.7793 | 1332.7323 | 35.3   | 555   | -   | 566  | 0    | R.EVQIVTTAMTLK.D                                  |
| 1373.7740 | 1372.7668 | 1372.7310 | 26.0   | 483   | -   | 494  | 1    | R.EVTDRQGNITLK.A                                  |
| 1475.8714 | 1474.8641 | 1474.7497 | 77.6   | 166   | -   | 178  | 1    | R.GNMSQVRQLVGMR.G                                 |
| 1545.9206 | 1544.9134 | 1544.7981 | 74.6   | 461   | -   | 474  | 1    | K.ATKDVICDLAQV.R.Y                                |
| 1729.9719 | 1728.9646 | 1728.8431 | 70.3   | 125   | -   | 138  | 1    | R.HTKVIDTWTETNER.L                                |
| 1834.1144 | 1833.1072 | 1832.9381 | 92.2   | 361   | -   | 378  | 1    | R.TPFTGGVSTAEATGTVRSK.V                           |
| 1842.1348 | 1841.1275 | 1840.9618 | 90.0   | 970   | -   | 985  | 0    | R.LGRPYMVSVDLHVLR.D + Oxidation (M)               |
| 1941.1169 | 1940.1096 | 1940.0102 | 51.2   | 1157  | -   | 1174 | 0    | R.VEDAGDTTLLPGLIELR.Q                             |
| 1972.1537 | 1971.1464 | 1971.0538 | 47.0   | 986   | -   | 1003 | 1    | R.DGNLVQRGDGLALLVFER.Q                            |
| 2105.2985 | 2104.2913 | 2104.1052 | 88.4   | 77    | -   | 96   | 1    | K.YATQAASVISVDDLKVPK.K                            |
| 2141.2573 | 2140.2500 | 2140.1052 | 67.7   | 72    | -   | 91   | 1    | K.DLGFKYATQAASVISVDDLK.V                          |
| 2384.1747 | 2383.1674 | 2383.0685 | 41.5   | 145   | -   | 165  | 1    | K.KNFDENAPLMSVMMANSR.G + 2 Oxidation (M)          |
| 2888.5748 | 2887.5675 | 2887.4637 | 35.9   | 1175  | -   | 1202 | 0    | R.QVEDTNQAMAITGGAPAEFTTPVLLGITK.A + Oxidation (M) |

No match to: 758.4449, 761.4539, 842.5599, 870.5871, 931.5710, 965.5635, 1003.6035, 1046.6100, 1062.6412, 1064.6582, 1075.6517, 1076.6699, 1118.6055, 1133.6818, 1140.6556, 1149.6929, 1158.7030, 1172.7483, 1179.6837, 1234.7577, 1277.7544, 1285.7582, 1296.7598, 1308.7634, 1340.7881, 1367.8244, 1390.7958, 1434.8763, 1457.8382, 1488.8863, 1493.8532, 1530.8044, 1537.8684, 1553.9584, 1561.9388, 1590.9204, 1598.9555, 1615.9930, 1638.9781, 1657.9450, 1683.0081, 1690.9261, 1699.9587, 1707.9303, 1713.9658, 1764.0939, 1786.0298, 1791.8986, 1804.0504, 1822.0336, 1839.0705, 1858.1460, 1862.0788, 1930.0964, 1955.1238, 1970.2165, 1985.1441, 1998.1688, 2076.2873, 2083.1868, 2126.2672, 2164.2353, 2203.3329, 2211.3104, 2215.3655, 2222.2808, 2235.3499, 2274.3577, 2284.3628, 2296.2822, 2322.3983, 2343.2148, 2357.2678, 2399.2446, 2418.3632, 2440.5128, 2592.4853, 2641.5621, 2653.5041, 2705.3800, 2717.3219, 3264.6235

12. **PAT\_SALAR** Mass: 50192 Score: 61 Expect: 0.28 Matches: 9

Putrescine aminotransferase OS=Salmonella arizonae (strain ATCC BAA-731 / CDC346-86 / RSK2980) OX=41514 GN=patA PE=3 SV=2

| Observed  | Mr(expt)  | Mr(calc)  | ppm    | Start | End | Miss | Ions | Peptide                                  |
|-----------|-----------|-----------|--------|-------|-----|------|------|------------------------------------------|
| 1259.7439 | 1258.7367 | 1258.6241 | 89.5   | 209   | -   | 219  | 0    | R.HVTFGNINAMR.M                          |
| 1367.8244 | 1366.8172 | 1366.8548 | -27.51 | 127   | -   | 140  | 1    | R.AILAKTLAALTFPK.L                       |
| 1488.8863 | 1487.8790 | 1487.7521 | 85.3   | 44    | -   | 55   | 1    | K.EHVNPGFLEYRK.S                         |
| 1545.9206 | 1544.9134 | 1544.8311 | 53.3   | 114   | -   | 126  | 0    | 23 K.QPLHSQELLDPLR.A                     |
| 1683.0081 | 1682.0008 | 1681.8536 | 87.5   | 372   | -   | 385  | 1    | R.QLAREYPLDVLHDAR.G                      |
| 1690.9261 | 1689.9189 | 1689.8356 | 49.3   | 444   | -   | 459  | 1    | K.SARNALAMQVSEEV.- + Oxidation (M)       |
| 2126.2672 | 2125.2599 | 2125.0659 | 91.3   | 4     | -   | 23   | 0    | R.LPSSASALACCahalNLIEK.R                 |
| 2222.2808 | 2221.2736 | 2221.0725 | 90.5   | 143   | -   | 162  | 1    | K.YSFFCNSGTSVEAALKLAK.A                  |
| 2399.2446 | 2398.2373 | 2398.1331 | 43.5   | 259   | -   | 279  | 1    | R.KLCDEFGALMILDEVQTMGR.T + Oxidation (M) |

No match to: 758.4449, 761.4539, 773.4587, 807.4419, 842.5599, 870.5871, 931.5710, 965.5635, 1003.6035, 1046.6100, 1062.6412, 1064.6582, 1075.6517, 1076.6699, 1118.6055, 1133.6818, 1140.6556, 1149.6929, 1158.7030, 1172.7483, 1179.6837, 1234.7577, 1277.7544, 1285.7582, 1296.7598, 1308.7634, 1320.6892, 1333.7866, 1340.7881, 1373.7740, 1390.7958, 1434.8763, 1457.8382, 1475.8714, 1493.8532, 1530.8044, 1537.8684, 1553.9584, 1561.9388, 1590.9204, 1598.9555, 1615.9930, 1638.9781, 1657.9450, 1699.9587, 1707.9303, 1713.9658, 1729.9719, 1764.0939, 1786.0298, 1791.8986, 1804.0504, 1822.0336, 1834.1144, 1839.0705, 1842.1348, 1858.1460, 1862.0788, 1930.0964, 1941.1169, 1955.1238, 1970.2165, 1972.1537, 1985.1441, 1998.1688, 2076.2873, 2083.1868, 2105.2985, 2141.2573, 2164.2353, 2203.3329, 2211.3104, 2215.3655, 2235.3499, 2274.3577, 2284.3628, 2296.2822, 2322.3983, 2343.2148, 2357.2678, 2384.1747, 2418.3632, 2440.5128, 2592.4853, 2641.5621, 2653.5041, 2705.3800, 2717.3219, 2888.5748, 3264.6235

13. **PAT\_SALPB** Mass: 50078 Score: 61 Expect: 0.29 Matches: 9

Putrescine aminotransferase OS=Salmonella paratyphi B (strain ATCC BAA-1250 / SPB7) OX=1016998 GN=patA PE=3 SV=1

| Observed  | Mr(expt)  | Mr(calc)  | ppm   | Start | End | Miss | Ions | Peptide                                  |
|-----------|-----------|-----------|-------|-------|-----|------|------|------------------------------------------|
| 1367.8244 | 1366.8172 | 1366.7245 | 67.8  | 33    | -   | 43   | 1    | K.ALNREVIDYFK.E                          |
| 1457.8382 | 1456.8309 | 1456.8362 | -3.61 | 413   | -   | 426  | 1    | R.VLVAGTLNNAKTR.I                        |
| 1488.8863 | 1487.8790 | 1487.7521 | 85.3  | 44    | -   | 55   | 1    | K.EHVNPGFLEYRK.S                         |
| 1545.9206 | 1544.9134 | 1544.8311 | 53.3  | 114   | -   | 126  | 0    | 23 K.QPLHSQELLDPLR.A                     |
| 1690.9261 | 1689.9189 | 1689.8356 | 49.3  | 444   | -   | 459  | 1    | K.SARNALAMQVSEEV.- + Oxidation (M)       |
| 1822.0336 | 1821.0263 | 1820.9872 | 21.5  | 194   | -   | 208  | 1    | K.STFRFRPFMLLPGRF.H                      |
| 2076.2873 | 2075.2800 | 2075.1197 | 77.3  | 114   | -   | 131  | 1    | K.QPLHSQELLDPLRAMLAK.T + Oxidation (M)   |
| 2222.2808 | 2221.2736 | 2221.0725 | 90.5  | 143   | -   | 162  | 1    | K.YSFFCNSGTSVEAALKLAK.A                  |
| 2399.2446 | 2398.2373 | 2398.1331 | 43.5  | 259   | -   | 279  | 1    | R.KLCDEFGALMILDEVQTMGR.T + Oxidation (M) |

No match to: 758.4449, 761.4539, 773.4587, 807.4419, 842.5599, 870.5871, 931.5710, 965.5635, 1003.6035, 1046.6100, 1062.6412, 1064.6582, 1075.6517, 1076.6699, 1118.6055, 1133.6818, 1140.6556, 1149.6929, 1158.7030, 1172.7483, 1179.6837, 1234.7577, 1259.7439, 1277.7544, 1285.7582, 1296.7598, 1308.7634, 1320.6892, 1333.7866, 1340.7881, 1373.7740, 1390.7958, 1434.8763, 1475.8714, 1493.8532, 1530.8044, 1537.8684, 1553.9584, 1561.9388, 1590.9204, 1598.9555, 1615.9930, 1638.9781, 1657.9450, 1683.0081, 1699.9587, 1707.9303, 1713.9658, 1729.9719, 1764.0939, 1786.0298, 1791.8986, 1804.0504, 1834.1144, 1839.0705, 1842.1348, 1858.1460, 1862.0788, 1930.0964, 1941.1169, 1955.1238, 1970.2165, 1972.1537, 1985.1441, 1998.1688, 2083.1868, 2105.2985, 2126.2672, 2141.2573, 2164.2353, 2203.3329, 2211.3104, 2215.3655, 2235.3499, 2274.3577, 2284.3628, 2296.2822, 2322.3983, 2343.2148, 2357.2678, 2384.1747, 2418.3632, 2440.5128, 2592.4853, 2641.5621, 2653.5041, 2705.3800, 2717.3219, 2888.5748, 3264.6235

14. **RPOC2\_PROMS** Mass: 150243 Score: 59 Expect: 0.43 Matches: 18

DNA-directed RNA polymerase subunit beta' OS=Prochlorococcus marinus (strain AS9601) OX=146891 GN=rpoC2 PE=3 SV=1

| Observed  | Mr(expt)  | Mr(calc)  | ppm  | Start | End | Miss | Ions | Peptide                             |
|-----------|-----------|-----------|------|-------|-----|------|------|-------------------------------------|
| 773.4587  | 772.4514  | 772.4443  | 9.21 | 490   | -   | 496  | 0    | R.QGNITLK.A                         |
| 807.4419  | 806.4346  | 806.3705  | 79.5 | 166   | -   | 172  | 0    | R.GNMSQVR.Q + Oxidation (M)         |
| 1046.6100 | 1045.6027 | 1045.5291 | 70.4 | 253   | -   | 262  | 0    | R.SIVVEAEDGK.F                      |
| 1062.6412 | 1061.6339 | 1061.5757 | 54.8 | 404   | -   | 412  | 0    | K.QAEVDVFLK.I                       |
| 1179.6837 | 1178.6765 | 1178.6547 | 18.5 | 799   | -   | 808  | 1    | R.LTYKDGELIK.S                      |
| 1340.7881 | 1339.7808 | 1339.7208 | 44.8 | 413   | -   | 425  | 1    | K.IVPQGNNSGKAQK.I                   |
| 1373.7740 | 1372.7668 | 1372.7310 | 26.0 | 485   | -   | 496  | 1    | K.EVTDRQGNITLK.A                    |
| 1475.8714 | 1474.8641 | 1474.7497 | 77.6 | 166   | -   | 178  | 1    | R.GNMSQVRQLVGMR.G                   |
| 1530.8044 | 1529.7971 | 1529.7508 | 30.3 | 57    | -   | 71   | 0    | K.THGTAITAAMADNLK.D + Oxidation (M) |

Table with columns: Observed, Mr(expt), Mr(calc), ppm, Start, End, Miss, Ions, Peptide. Contains protein identification data for RPOC2\_PROMO.

15. RPOC2\_PROMO Mass: 150258 Score: 57 Expect: 0.67 Matches: 18

DNA-directed RNA polymerase subunit beta' OS=Prochlorococcus marinus (strain MIT 9301) OX=167546 GN=rpoC2 PE=3 SV=1

Table with columns: Observed, Mr(expt), Mr(calc), ppm, Start, End, Miss, Ions, Peptide. Contains protein identification data for RPOC2\_PROMO.

16. RL9\_PARXL Mass: 16075 Score: 57 Expect: 0.68 Matches: 5

50S ribosomal protein L9 OS=Paraburkholderia xenovorans (strain LB400) OX=266265 GN=rplI PE=3 SV=1

Table with columns: Observed, Mr(expt), Mr(calc), ppm, Start, End, Miss, Ions, Peptide. Contains protein identification data for RL9\_PARXL.

17. RL10\_THIDA Mass: 18640 Score: 56 Expect: 0.92 Matches: 7

50S ribosomal protein L10 OS=Thiobacillus denitrificans (strain ATCC 25259) OX=292415 GN=rplJ PE=3 SV=1

Table with columns: Observed, Mr(expt), Mr(calc), ppm, Start, End, Miss, Ions, Peptide. Contains protein identification data for RL10\_THIDA.

18. EPMA\_SALAR Mass: 37284 Score: 55 Expect: 0.96 Matches: 3

Elongation factor P--(R)-beta-lysine ligase OS=Salmonella arizonae (strain ATCC BAA-731 / CDC346-86 / RSK2980) OX=41514 GN=epmA

Table with columns: Observed, Mr(expt), Mr(calc), ppm, Start, End, Miss, Ions, Peptide. Contains protein identification data for EPMA\_SALAR.

1259.7439, 1277.7544, 1285.7582, 1296.7598, 1308.7634, 1320.6892, 1333.7866, 1340.7881, 1367.8244, 1373.7740, 1390.7958, 1434.8763, 1457.8382, 1475.8714, 1488.8863, 1493.8532, 1530.8044, 1537.8684, 1545.9206, 1553.9584, 1590.9204, 1598.9555, 1615.9930, 1638.9781, 1657.9450, 1683.0081, 1690.9261, 1699.9587, 1707.9303, 1713.9658, 1729.9719, 1764.0939, 1786.0298, 1791.8986, 1804.0504, 1822.0336, 1834.1144, 1839.0705, 1842.1348, 1858.1460, 1862.0788, 1930.0964, 1941.1169, 1955.1238, 1970.2165, 1972.1537, 1998.1688, 2076.2873, 2083.1868, 2105.2985, 2126.2672, 2141.2573, 2164.2353, 2203.3329, 2211.3104, 2215.3655, 2222.2808, 2235.3499, 2274.3577, 2284.3628, 2296.2822, 2322.3983, 2343.2148, 2357.2678, 2399.2446, 2418.3632, 2440.5128, 2592.4853, 2641.5621, 2653.5041, 2705.3800, 2717.3219, 2888.5748, 3264.6235

19. [IF2\\_BACFN](#) Mass: 112675 Score: 55 Expect: 1.2 Matches: 13

Translation initiation factor IF-2 OS=Bacteroides fragilis (strain ATCC 25285 / DSM 2151 / JCM 11019 / NCTC 9343) OX=272559 GN=i

| Observed                                                                                                                                                                                                                                                                                                                                                                                                                                                                                                                                                                                                                                                                                                                                                                                                                                                                                                                                                                                                | Mr (expt) | Mr (calc) | ppm    | Start | End | Miss | Ions | Peptide                                  |
|---------------------------------------------------------------------------------------------------------------------------------------------------------------------------------------------------------------------------------------------------------------------------------------------------------------------------------------------------------------------------------------------------------------------------------------------------------------------------------------------------------------------------------------------------------------------------------------------------------------------------------------------------------------------------------------------------------------------------------------------------------------------------------------------------------------------------------------------------------------------------------------------------------------------------------------------------------------------------------------------------------|-----------|-----------|--------|-------|-----|------|------|------------------------------------------|
| 1062.6412                                                                                                                                                                                                                                                                                                                                                                                                                                                                                                                                                                                                                                                                                                                                                                                                                                                                                                                                                                                               | 1061.6339 | 1061.5618 | 67.9   | 63    | -   | 70   | 1    | R.FIQERQNK.D                             |
| 1076.6699                                                                                                                                                                                                                                                                                                                                                                                                                                                                                                                                                                                                                                                                                                                                                                                                                                                                                                                                                                                               | 1075.6627 | 1075.6026 | 55.8   | 235   | -   | 243  | 0    | K.IRPTEFVSK.I                            |
| 1165.6616                                                                                                                                                                                                                                                                                                                                                                                                                                                                                                                                                                                                                                                                                                                                                                                                                                                                                                                                                                                               | 1164.6543 | 1164.5458 | 93.2   | 734   | -   | 742  | 1    | K.AMFNERQR.V                             |
| 1259.7439                                                                                                                                                                                                                                                                                                                                                                                                                                                                                                                                                                                                                                                                                                                                                                                                                                                                                                                                                                                               | 1258.7367 | 1258.7285 | 6.47   | 108   | -   | 118  | 1    | K.FKPVGKIDLDK.L                          |
| 1296.7598                                                                                                                                                                                                                                                                                                                                                                                                                                                                                                                                                                                                                                                                                                                                                                                                                                                                                                                                                                                               | 1295.7525 | 1295.6357 | 90.1   | 73    | -   | 84   | 1    | R.NKASVSDIGYDK.K                         |
| 1340.7881                                                                                                                                                                                                                                                                                                                                                                                                                                                                                                                                                                                                                                                                                                                                                                                                                                                                                                                                                                                               | 1339.7808 | 1339.6693 | 83.2   | 38    | -   | 48   | 0    | K.ITEEQYAMLVK.E + Oxidation (M)          |
| 1488.8863                                                                                                                                                                                                                                                                                                                                                                                                                                                                                                                                                                                                                                                                                                                                                                                                                                                                                                                                                                                               | 1487.8790 | 1487.7467 | 88.9   | 381   | -   | 393  | 1    | K.QEVSEEDVARQVK.E                        |
| 1561.9388                                                                                                                                                                                                                                                                                                                                                                                                                                                                                                                                                                                                                                                                                                                                                                                                                                                                                                                                                                                               | 1560.9315 | 1560.8107 | 77.4   | 690   | -   | 704  | 1    | R.NATGSIESTLDRGR.G                       |
| 1713.9658                                                                                                                                                                                                                                                                                                                                                                                                                                                                                                                                                                                                                                                                                                                                                                                                                                                                                                                                                                                               | 1712.9585 | 1712.9937 | -20.56 | 806   | -   | 820  | 1    | R.RIALGNFQELNVIVK.G                      |
| 1842.1348                                                                                                                                                                                                                                                                                                                                                                                                                                                                                                                                                                                                                                                                                                                                                                                                                                                                                                                                                                                               | 1841.1275 | 1840.9716 | 84.7   | 674   | -   | 689  | 1    | K.VLLEAEMLDLKNPNR.N + Oxidation (M)      |
| 2343.2148                                                                                                                                                                                                                                                                                                                                                                                                                                                                                                                                                                                                                                                                                                                                                                                                                                                                                                                                                                                               | 2342.2075 | 2342.2477 | -17.14 | 664   | -   | 684  | 1    | K.GLVPELMEKVLLEAEMLDLK.A + Oxidation (M) |
| 2384.1747                                                                                                                                                                                                                                                                                                                                                                                                                                                                                                                                                                                                                                                                                                                                                                                                                                                                                                                                                                                               | 2383.1674 | 2383.2669 | -41.73 | 584   | -   | 606  | 1    | R.GAKVTDAIIIVAADDDVMPQTK.E               |
| 2888.5748                                                                                                                                                                                                                                                                                                                                                                                                                                                                                                                                                                                                                                                                                                                                                                                                                                                                                                                                                                                               | 2887.5675 | 2887.3698 | 68.5   | 638   | -   | 662  | 1    | K.ETLAQMNYLVEEWGGYQSQDISAK.K             |
| <b>No match to:</b> 758.4449, 761.4539, 773.4587, 807.4419, 842.5599, 870.5871, 931.5710, 965.5635, 1003.6035, 1046.6100, 1064.6582, 1075.6517, 1118.6055, 1133.6818, 1140.6556, 1149.6929, 1158.7030, 1172.7483, 1179.6837, 1234.7577, 1277.7544, 1285.7582, 1308.7634, 1320.6892, 1333.7866, 1367.8244, 1373.7740, 1390.7958, 1434.8763, 1457.8382, 1475.8714, 1493.8532, 1530.8044, 1537.8684, 1545.9206, 1553.9584, 1590.9204, 1598.9555, 1615.9930, 1638.9781, 1657.9450, 1683.0081, 1690.9261, 1699.9587, 1707.9303, 1729.9719, 1764.0939, 1786.0298, 1791.8986, 1804.0504, 1822.0336, 1834.1144, 1839.0705, 1858.1460, 1862.0788, 1930.0964, 1941.1169, 1955.1238, 1970.2165, 1972.1537, 1985.1441, 1998.1688, 2076.2873, 2083.1868, 2105.2985, 2126.2672, 2141.2573, 2164.2353, 2203.3329, 2211.3104, 2215.3655, 2222.2808, 2235.3499, 2274.3577, 2284.3628, 2296.2822, 2322.3983, 2357.2678, 2399.2446, 2418.3632, 2440.5128, 2592.4853, 2641.5621, 2653.5041, 2705.3800, 2717.3219, 3264.6235 |           |           |        |       |     |      |      |                                          |

20. [IF2\\_BACFR](#) Mass: 112675 Score: 55 Expect: 1.2 Matches: 13

Translation initiation factor IF-2 OS=Bacteroides fragilis (strain YCH46) OX=295405 GN=infB PE=3 SV=1

| Observed                                                                                                                                                                                                                                                                                                                                                                                                                                                                                                                                                                                                                                                                                                                                                                                                                                                                                                                                                                                                | Mr (expt) | Mr (calc) | ppm    | Start | End | Miss | Ions | Peptide                                  |
|---------------------------------------------------------------------------------------------------------------------------------------------------------------------------------------------------------------------------------------------------------------------------------------------------------------------------------------------------------------------------------------------------------------------------------------------------------------------------------------------------------------------------------------------------------------------------------------------------------------------------------------------------------------------------------------------------------------------------------------------------------------------------------------------------------------------------------------------------------------------------------------------------------------------------------------------------------------------------------------------------------|-----------|-----------|--------|-------|-----|------|------|------------------------------------------|
| 1062.6412                                                                                                                                                                                                                                                                                                                                                                                                                                                                                                                                                                                                                                                                                                                                                                                                                                                                                                                                                                                               | 1061.6339 | 1061.5618 | 67.9   | 63    | -   | 70   | 1    | R.FIQERQNK.D                             |
| 1076.6699                                                                                                                                                                                                                                                                                                                                                                                                                                                                                                                                                                                                                                                                                                                                                                                                                                                                                                                                                                                               | 1075.6627 | 1075.6026 | 55.8   | 235   | -   | 243  | 0    | K.IRPTEFVSK.I                            |
| 1165.6616                                                                                                                                                                                                                                                                                                                                                                                                                                                                                                                                                                                                                                                                                                                                                                                                                                                                                                                                                                                               | 1164.6543 | 1164.5458 | 93.2   | 734   | -   | 742  | 1    | K.AMFNERQR.V                             |
| 1259.7439                                                                                                                                                                                                                                                                                                                                                                                                                                                                                                                                                                                                                                                                                                                                                                                                                                                                                                                                                                                               | 1258.7367 | 1258.7285 | 6.47   | 108   | -   | 118  | 1    | K.FKPVGKIDLDK.L                          |
| 1296.7598                                                                                                                                                                                                                                                                                                                                                                                                                                                                                                                                                                                                                                                                                                                                                                                                                                                                                                                                                                                               | 1295.7525 | 1295.6357 | 90.1   | 73    | -   | 84   | 1    | R.NKASVSDIGYDK.K                         |
| 1340.7881                                                                                                                                                                                                                                                                                                                                                                                                                                                                                                                                                                                                                                                                                                                                                                                                                                                                                                                                                                                               | 1339.7808 | 1339.6693 | 83.2   | 38    | -   | 48   | 0    | K.ITEEQYAMLVK.E + Oxidation (M)          |
| 1488.8863                                                                                                                                                                                                                                                                                                                                                                                                                                                                                                                                                                                                                                                                                                                                                                                                                                                                                                                                                                                               | 1487.8790 | 1487.7467 | 88.9   | 381   | -   | 393  | 1    | K.QEVSEEDVARQVK.E                        |
| 1561.9388                                                                                                                                                                                                                                                                                                                                                                                                                                                                                                                                                                                                                                                                                                                                                                                                                                                                                                                                                                                               | 1560.9315 | 1560.8107 | 77.4   | 690   | -   | 704  | 1    | R.NATGSIESTLDRGR.G                       |
| 1713.9658                                                                                                                                                                                                                                                                                                                                                                                                                                                                                                                                                                                                                                                                                                                                                                                                                                                                                                                                                                                               | 1712.9585 | 1712.9937 | -20.56 | 806   | -   | 820  | 1    | R.RIALGNFQELNVIVK.G                      |
| 1842.1348                                                                                                                                                                                                                                                                                                                                                                                                                                                                                                                                                                                                                                                                                                                                                                                                                                                                                                                                                                                               | 1841.1275 | 1840.9716 | 84.7   | 674   | -   | 689  | 1    | K.VLLEAEMLDLKNPNR.N + Oxidation (M)      |
| 2343.2148                                                                                                                                                                                                                                                                                                                                                                                                                                                                                                                                                                                                                                                                                                                                                                                                                                                                                                                                                                                               | 2342.2075 | 2342.2477 | -17.14 | 664   | -   | 684  | 1    | K.GLVPELMEKVLLEAEMLDLK.A + Oxidation (M) |
| 2384.1747                                                                                                                                                                                                                                                                                                                                                                                                                                                                                                                                                                                                                                                                                                                                                                                                                                                                                                                                                                                               | 2383.1674 | 2383.2669 | -41.73 | 584   | -   | 606  | 1    | R.GAKVTDAIIIVAADDDVMPQTK.E               |
| 2888.5748                                                                                                                                                                                                                                                                                                                                                                                                                                                                                                                                                                                                                                                                                                                                                                                                                                                                                                                                                                                               | 2887.5675 | 2887.3698 | 68.5   | 638   | -   | 662  | 1    | K.ETLAQMNYLVEEWGGYQSQDISAK.K             |
| <b>No match to:</b> 758.4449, 761.4539, 773.4587, 807.4419, 842.5599, 870.5871, 931.5710, 965.5635, 1003.6035, 1046.6100, 1064.6582, 1075.6517, 1118.6055, 1133.6818, 1140.6556, 1149.6929, 1158.7030, 1172.7483, 1179.6837, 1234.7577, 1277.7544, 1285.7582, 1308.7634, 1320.6892, 1333.7866, 1367.8244, 1373.7740, 1390.7958, 1434.8763, 1457.8382, 1475.8714, 1493.8532, 1530.8044, 1537.8684, 1545.9206, 1553.9584, 1590.9204, 1598.9555, 1615.9930, 1638.9781, 1657.9450, 1683.0081, 1690.9261, 1699.9587, 1707.9303, 1729.9719, 1764.0939, 1786.0298, 1791.8986, 1804.0504, 1822.0336, 1834.1144, 1839.0705, 1858.1460, 1862.0788, 1930.0964, 1941.1169, 1955.1238, 1970.2165, 1972.1537, 1985.1441, 1998.1688, 2076.2873, 2083.1868, 2105.2985, 2126.2672, 2141.2573, 2164.2353, 2203.3329, 2211.3104, 2215.3655, 2222.2808, 2235.3499, 2274.3577, 2284.3628, 2296.2822, 2322.3983, 2357.2678, 2399.2446, 2418.3632, 2440.5128, 2592.4853, 2641.5621, 2653.5041, 2705.3800, 2717.3219, 3264.6235 |           |           |        |       |     |      |      |                                          |

## Search Parameters

Type of search : MS/MS Ion Search  
 Enzyme : Trypsin  
 Fixed modifications : [Carbamidomethyl \(C\)](#)  
 Variable modifications : [Oxidation \(M\)](#)  
 Mass values : Monoisotopic  
 Protein Mass : Unrestricted  
 Peptide Mass Tolerance : ± 100 ppm  
 Fragment Mass Tolerance : ± 2 Da  
 Max Missed Cleavages : 1  
 Instrument type : MALDI-TOF-TOF  
 Query1 (758.4449,1+): <no title>  
 Query2 (761.4539,1+): <no title>  
 Query3 (773.4587,1+): <no title>  
 Query4 (807.4419,1+): <no title>  
 Query5 (842.5599,1+): <no title>  
 Query6 (870.5871,1+): <no title>  
 Query7 (931.5710,1+): <no title>  
 Query8 (965.5635,1+): <no title>  
 Query9 (1003.6035,1+): <no title>  
 Query10 (1046.6100,1+): <no title>  
 Query11 (1062.6412,1+): <no title>  
 Query12 (1064.6582,1+): <no title>  
 Query13 (1075.6517,1+): <no title>  
 Query14 (1076.6699,1+): <no title>  
 Query15 (1118.6055,1+): <no title>  
 Query16 (1133.6818,1+): <no title>  
 Query17 (1140.6556,1+): <no title>  
 Query18 (1149.6929,1+): <no title>  
 Query19 (1158.7030,1+): <no title>  
 Query20 (1165.6616,1+): <no title>  
 Query21 (1172.7483,1+): <no title>  
 Query22 (1179.6837,1+): <no title>  
 Query23 (1234.7577,1+): <no title>  
 Query24 (1259.7439,1+): <no title>  
 Query25 (1277.7544,1+): <no title>  
 Query26 (1285.7582,1+): <no title>  
 Query27 (1296.7598,1+): <no title>  
 Query28 (1308.7634,1+): <no title>



Query29 (1320.6892,1+) : <no title>  
Query30 (1333.7866,1+) : <no title>  
Query31 (1340.7881,1+) : <no title>  
Query32 (1367.8244,1+) : <no title>  
Query33 (1373.7740,1+) : <no title>  
Query34 (1390.7958,1+) : <no title>  
Query35 (1434.8763,1+) : <no title>  
Query36 (1457.8382,1+) : <no title>  
Query37 (1475.8714,1+) : <no title>  
Query38 (1488.8863,1+) : <no title>  
Query39 (1493.8532,1+) : <no title>  
Query40 (1530.8044,1+) : <no title>  
Query41 (1537.8684,1+) : <no title>  
Query42 (1545.9206,1+) : <no title>  
Query43 (1553.9584,1+) : <no title>  
Query44 (1561.9388,1+) : <no title>  
Query45 (1590.9204,1+) : <no title>  
Query46 (1598.9555,1+) : <no title>  
Query47 (1615.9930,1+) : <no title>  
Query48 (1638.9781,1+) : <no title>  
Query49 (1657.9450,1+) : <no title>  
Query50 (1683.0081,1+) : <no title>  
Query51 (1690.9261,1+) : <no title>  
Query52 (1699.9587,1+) : <no title>  
Query53 (1707.9303,1+) : <no title>  
Query54 (1713.9658,1+) : <no title>  
Query55 (1729.9719,1+) : <no title>  
Query56 (1764.0939,1+) : <no title>  
Query57 (1786.0298,1+) : <no title>  
Query58 (1791.8986,1+) : <no title>  
Query59 (1804.0504,1+) : <no title>  
Query60 (1822.0336,1+) : <no title>  
Query61 (1834.1144,1+) : <no title>  
Query62 (1839.0705,1+) : <no title>  
Query63 (1842.1348,1+) : <no title>  
Query64 (1858.1460,1+) : <no title>  
Query65 (1862.0788,1+) : <no title>  
Query66 (1930.0964,1+) : <no title>  
Query67 (1941.1169,1+) : <no title>  
Query68 (1955.1238,1+) : <no title>  
Query69 (1970.2165,1+) : <no title>  
Query70 (1972.1537,1+) : <no title>  
Query71 (1985.1441,1+) : <no title>  
Query72 (1998.1688,1+) : <no title>  
Query73 (2076.2873,1+) : <no title>  
Query74 (2083.1868,1+) : <no title>  
Query75 (2105.2985,1+) : <no title>  
Query76 (2126.2672,1+) : <no title>  
Query77 (2141.2573,1+) : <no title>  
Query78 (2164.2353,1+) : <no title>  
Query79 (2203.3329,1+) : <no title>  
Query80 (2211.3104,1+) : <no title>  
Query81 (2215.3655,1+) : <no title>  
Query82 (2222.2808,1+) : <no title>  
Query83 (2235.3499,1+) : <no title>  
Query84 (2274.3577,1+) : <no title>  
Query85 (2284.3628,1+) : <no title>  
Query86 (2296.2822,1+) : <no title>  
Query87 (2322.3983,1+) : <no title>  
Query88 (2343.2148,1+) : <no title>  
Query89 (2357.2678,1+) : <no title>  
Query90 (2384.1747,1+) : <no title>  
Query91 (2399.2446,1+) : <no title>  
Query92 (2418.3632,1+) : <no title>  
Query93 (2440.5128,1+) : <no title>  
Query94 (2592.4853,1+) : <no title>  
Query95 (2641.5621,1+) : <no title>  
Query96 (2653.5041,1+) : <no title>  
Query97 (2705.3800,1+) : <no title>  
Query98 (2717.3219,1+) : <no title>  
Query99 (2888.5748,1+) : <no title>  
Query100 (3264.6235,1+) : <no title>

Mascot: <http://www.matrixscience.com/>

*MALDI MS MS Data Sheet of Pus  
Isolate*

Comment 1

Comment 2

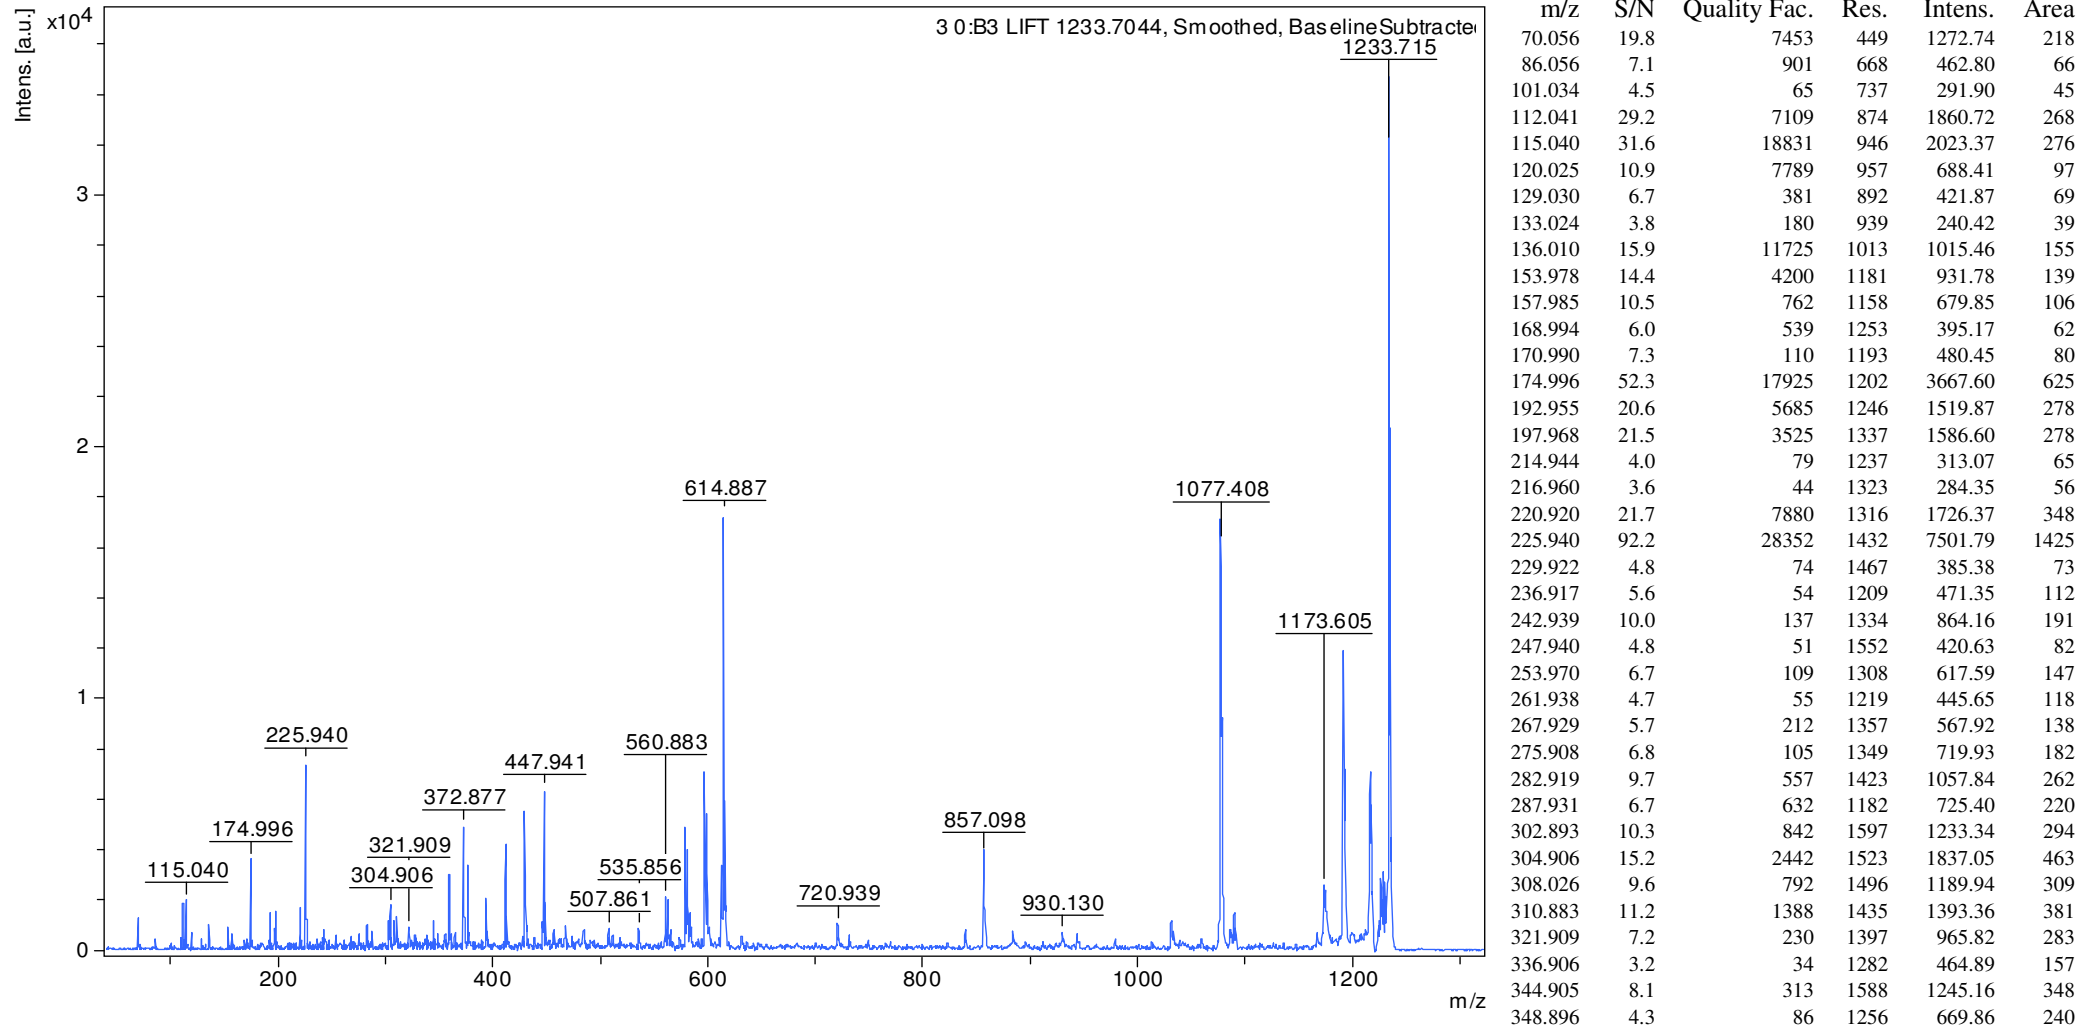

| m/z      | S/N  | Quality | Fac. | Res.     | Intens. | Area |
|----------|------|---------|------|----------|---------|------|
| 359.861  | 18.9 | 9758    | 1560 | 3078.07  | 922     |      |
| 364.889  | 4.4  | 86      | 1376 | 730.03   | 252     |      |
| 372.877  | 28.9 | 21197   | 1578 | 4994.09  | 1545    |      |
| 376.878  | 19.4 | 12806   | 1517 | 3385.31  | 1103    |      |
| 393.963  | 12.0 | 1331    | 1769 | 2176.36  | 642     |      |
| 411.945  | 22.9 | 7575    | 1846 | 4351.83  | 1299    |      |
| 429.943  | 28.6 | 4831    | 1775 | 5669.09  | 1855    |      |
| 447.941  | 31.3 | 26338   | 1922 | 6483.52  | 2062    |      |
| 456.856  | 4.3  | 43      | 1574 | 901.11   | 359     |      |
| 467.843  | 4.5  | 116     | 1405 | 978.95   | 450     |      |
| 507.861  | 4.2  | 176     | 1296 | 935.40   | 517     |      |
| 535.856  | 3.9  | 274     | 1419 | 905.12   | 489     |      |
| 560.883  | 9.2  | 2664    | 1895 | 2159.73  | 928     |      |
| 563.196  | 8.1  | 609     | 1767 | 1875.93  | 869     |      |
| 565.578  | 3.1  | 57      | 1561 | 717.20   | 378     |      |
| 578.895  | 21.1 | 9556    | 1833 | 4883.03  | 2261    |      |
| 581.148  | 16.3 | 2571    | 1687 | 3754.75  | 1898    |      |
| 583.480  | 6.0  | 81      | 1348 | 1378.67  | 877     |      |
| 596.907  | 31.0 | 11345   | 1749 | 7044.03  | 3584    |      |
| 599.107  | 22.6 | 4224    | 1738 | 5131.18  | 2641    |      |
| 601.925  | 3.4  | 74      | 1306 | 771.74   | 532     |      |
| 614.887  | 77.9 | 89722   | 2004 | 17470.26 | 8075    |      |
| 720.939  | 5.6  | 490     | 1311 | 1093.32  | 963     |      |
| 731.945  | 3.3  | 328     | 1592 | 643.56   | 477     |      |
| 840.092  | 4.2  | 535     | 1634 | 779.30   | 687     |      |
| 857.098  | 20.7 | 16675   | 1573 | 3844.99  | 3624    |      |
| 884.075  | 4.0  | 131     | 1054 | 737.39   | 1087    |      |
| 930.130  | 3.9  | 221     | 1557 | 743.49   | 801     |      |
| 943.897  | 3.1  | 156     | 1370 | 600.96   | 753     |      |
| 1031.346 | 5.9  | 135     | 1528 | 1192.27  | 1537    |      |
| 1077.408 | 79.6 | 100182  | 1757 | 16226.36 | 19610   |      |
| 1086.595 | 4.1  | 195     | 1208 | 831.37   | 1482    |      |
| 1090.075 | 7.0  | 1485    | 2070 | 1450.67  | 1517    |      |
| 1167.312 | 4.0  | 159     | 1947 | 640.91   | 798     |      |
| 1173.605 | 16.9 | 1212    | 1363 | 2638.34  | 4734    |      |
| 1176.616 | 7.5  | 233     | 1307 | 1141.23  | 2145    |      |
| 1182.920 | 3.4  | 75      | 1312 | 510.06   | 968     |      |
| 1191.633 | 75.5 | 25712   | 1988 | 10926.44 | 13790   |      |
| 1198.910 | 5.9  | 58      | 1398 | 825.32   | 1509    |      |
| 1201.833 | 3.3  | 88      | 1335 | 458.06   | 879     |      |
| 1204.542 | 3.0  | 33      | 1769 | 417.86   | 604     |      |

| m/z      | S/N   | Quality Fac. | Res. | Intens.  | Area  |
|----------|-------|--------------|------|----------|-------|
| 1206.553 | 3.7   | 42           | 1770 | 507.85   | 738   |
| 1208.612 | 4.6   | 37           | 1520 | 630.43   | 1066  |
| 1216.643 | 48.1  | 5324         | 1352 | 6397.60  | 12299 |
| 1224.541 | 8.7   | 227          | 1805 | 1138.60  | 1659  |
| 1226.837 | 19.6  | 1831         | 2467 | 2560.14  | 2736  |
| 1229.158 | 21.1  | 775          | 2791 | 2731.50  | 2588  |
| 1231.384 | 17.6  | 43           | 2885 | 2267.64  | 2087  |
| 1233.715 | 251.6 | 39482        | 2795 | 32094.42 | 30569 |

Comment 1

Comment 2

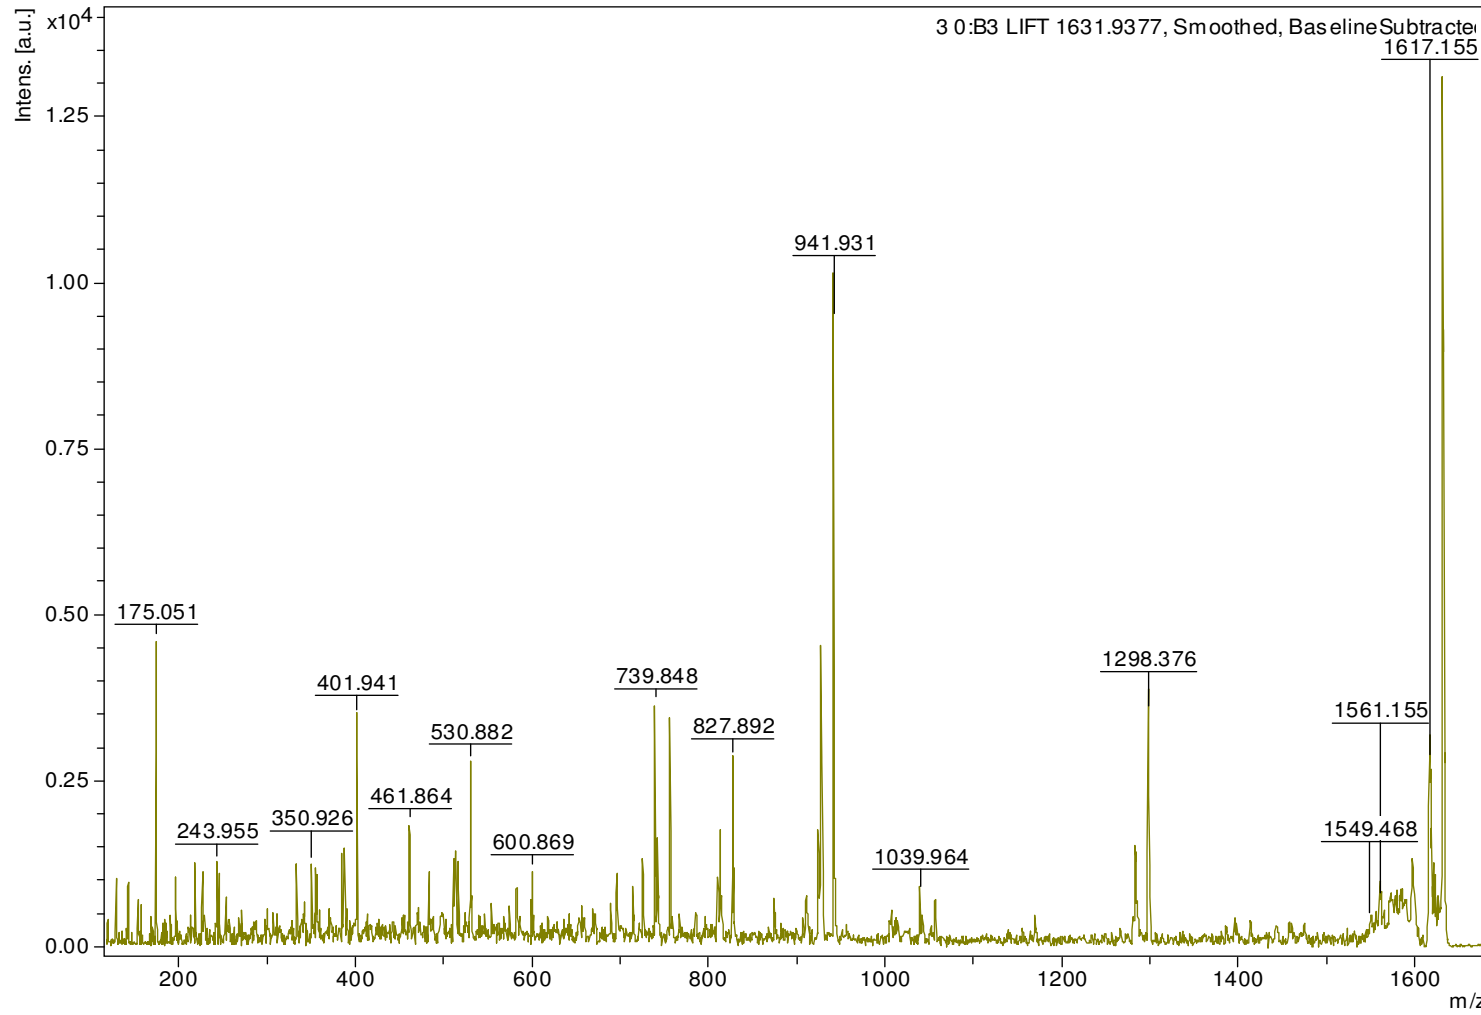

| m/z     | S/N  | Quality | Fac. | Res.    | Intens. | Area |
|---------|------|---------|------|---------|---------|------|
| 70.081  | 5.5  | 306     | 292  | 391.20  | 103     |      |
| 84.096  | 4.5  | 395     | 684  | 322.61  | 44      |      |
| 86.111  | 6.8  | 401     | 558  | 496.74  | 85      |      |
| 98.106  | 8.2  | 962     | 658  | 601.58  | 100     |      |
| 101.075 | 5.4  | 153     | 741  | 397.03  | 60      |      |
| 112.074 | 16.0 | 3352    | 1023 | 1146.22 | 141     |      |
| 120.075 | 5.8  | 1987    | 918  | 409.81  | 60      |      |
| 129.096 | 14.6 | 8466    | 1081 | 1035.14 | 140     |      |
| 136.038 | 3.4  | 110     | 1131 | 238.72  | 33      |      |
| 143.095 | 13.9 | 18129   | 1244 | 977.68  | 128     |      |
| 154.050 | 10.5 | 1035    | 1228 | 726.87  | 104     |      |
| 158.041 | 9.2  | 2380    | 1281 | 646.56  | 92      |      |
| 169.044 | 6.5  | 4186    | 1177 | 451.00  | 76      |      |
| 171.058 | 4.5  | 55      | 1203 | 312.25  | 52      |      |
| 175.051 | 66.9 | 26654   | 1286 | 4636.53 | 738     |      |
| 181.015 | 3.1  | 39      | 1361 | 216.42  | 34      |      |
| 183.039 | 5.1  | 93      | 1195 | 362.59  | 65      |      |
| 185.043 | 6.4  | 68      | 1215 | 453.24  | 81      |      |
| 191.030 | 6.9  | 152     | 1339 | 487.11  | 82      |      |
| 197.036 | 14.8 | 8338    | 1390 | 1050.60 | 176     |      |
| 201.024 | 3.3  | 34      | 1360 | 237.46  | 42      |      |
| 211.009 | 4.1  | 41      | 1188 | 299.77  | 64      |      |
| 214.044 | 6.3  | 149     | 1166 | 460.22  | 101     |      |
| 218.994 | 16.9 | 12832   | 1280 | 1275.68 | 262     |      |
| 226.983 | 15.4 | 1351    | 1283 | 1196.77 | 255     |      |
| 229.963 | 6.0  | 396     | 1200 | 473.76  | 110     |      |
| 232.030 | 3.7  | 39      | 1336 | 290.51  | 61      |      |
| 243.955 | 15.6 | 1768    | 1261 | 1281.53 | 302     |      |
| 246.009 | 13.4 | 3268    | 1194 | 1110.05 | 279     |      |
| 254.008 | 9.2  | 288     | 1290 | 792.01  | 191     |      |
| 257.993 | 4.8  | 92      | 1299 | 416.42  | 101     |      |
| 262.943 | 3.4  | 54      | 1331 | 305.85  | 74      |      |
| 271.988 | 6.2  | 169     | 1113 | 571.80  | 173     |      |
| 285.976 | 4.1  | 62      | 1254 | 394.64  | 112     |      |
| 288.017 | 4.3  | 50      | 1022 | 411.87  | 145     |      |
| 300.927 | 5.6  | 78      | 1310 | 576.95  | 167     |      |
| 308.040 | 4.7  | 86      | 1260 | 501.06  | 155     |      |
| 311.947 | 4.7  | 103     | 1395 | 504.63  | 143     |      |

| m/z      | S/N  | Quality | Fac. | Res.    | Intens. | Area |
|----------|------|---------|------|---------|---------|------|
| 333.897  | 10.7 | 2453    | 1354 | 1267.78 | 400     |      |
| 342.964  | 5.9  | 88      | 1354 | 732.17  | 239     |      |
| 350.926  | 9.8  | 1369    | 1400 | 1263.72 | 409     |      |
| 355.925  | 10.4 | 242     | 1253 | 1367.98 | 504     |      |
| 359.958  | 4.2  | 76      | 1266 | 562.06  | 208     |      |
| 370.983  | 4.3  | 87      | 1103 | 606.03  | 267     |      |
| 384.937  | 9.7  | 2415    | 1587 | 1423.28 | 455     |      |
| 388.048  | 10.2 | 1945    | 1265 | 1498.54 | 607     |      |
| 390.883  | 4.1  | 127     | 1268 | 609.85  | 249     |      |
| 401.941  | 22.7 | 133935  | 1667 | 3485.68 | 1118    |      |
| 461.864  | 10.5 | 4257    | 1499 | 1886.50 | 799     |      |
| 471.892  | 3.6  | 30      | 1348 | 653.72  | 316     |      |
| 483.910  | 6.2  | 221     | 1687 | 1150.25 | 459     |      |
| 511.898  | 7.2  | 593     | 1724 | 1400.40 | 588     |      |
| 513.896  | 7.2  | 843     | 1789 | 1409.68 | 573     |      |
| 516.998  | 6.6  | 844     | 1639 | 1300.45 | 581     |      |
| 530.882  | 14.0 | 71048   | 1945 | 2798.35 | 1090    |      |
| 554.882  | 3.3  | 64      | 1588 | 677.93  | 343     |      |
| 574.874  | 3.1  | 101     | 1564 | 647.74  | 348     |      |
| 582.854  | 4.7  | 145     | 1696 | 979.99  | 495     |      |
| 600.869  | 5.5  | 458     | 2103 | 1164.30 | 497     |      |
| 689.830  | 3.2  | 97      | 1916 | 687.82  | 389     |      |
| 696.865  | 5.4  | 357     | 1979 | 1162.53 | 646     |      |
| 714.862  | 4.5  | 300     | 2019 | 958.37  | 542     |      |
| 725.923  | 6.4  | 675     | 1780 | 1353.33 | 886     |      |
| 739.848  | 17.6 | 23048   | 2165 | 3690.41 | 2041    |      |
| 742.941  | 7.8  | 1610    | 2130 | 1635.81 | 925     |      |
| 756.858  | 16.2 | 16238   | 2176 | 3361.28 | 1911    |      |
| 810.848  | 5.8  | 240     | 1938 | 1168.31 | 824     |      |
| 813.883  | 8.8  | 2795    | 2244 | 1768.32 | 1083    |      |
| 827.892  | 14.6 | 28802   | 2205 | 2848.40 | 1820    |      |
| 874.808  | 4.2  | 228     | 1990 | 789.58  | 607     |      |
| 910.860  | 4.6  | 95      | 2060 | 855.68  | 675     |      |
| 924.891  | 10.3 | 862     | 2115 | 1890.84 | 1487    |      |
| 927.849  | 24.7 | 7827    | 1926 | 4556.99 | 3955    |      |
| 941.931  | 52.1 | 39009   | 2097 | 9462.53 | 7716    |      |
| 1007.816 | 3.0  | 43      | 2471 | 511.91  | 393     |      |
| 1039.964 | 5.0  | 727     | 2153 | 838.13  | 777     |      |
| 1057.026 | 4.1  | 1120    | 1669 | 687.27  | 843     |      |
| 1283.774 | 9.8  | 1104    | 1495 | 1547.23 | 2950    |      |
| 1298.376 | 21.9 | 37476   | 2020 | 3549.82 | 5111    |      |

| m/z      | S/N   | Quality | Fac. | Res.     | Intens. | Area |
|----------|-------|---------|------|----------|---------|------|
| 1549.468 | 3.6   | 49      | 1722 | 438.38   | 1023    |      |
| 1558.739 | 3.3   | 57      | 1733 | 393.17   | 921     |      |
| 1561.155 | 6.1   | 207     | 2025 | 725.33   | 1458    |      |
| 1564.765 | 4.4   | 190     | 1736 | 507.72   | 1192    |      |
| 1571.892 | 5.6   | 88      | 1744 | 637.08   | 1508    |      |
| 1574.110 | 5.8   | 255     | 1982 | 671.54   | 1403    |      |
| 1578.020 | 5.8   | 369     | 2052 | 656.94   | 1342    |      |
| 1580.233 | 4.0   | 184     | 1974 | 451.43   | 958     |      |
| 1582.181 | 4.8   | 126     | 2378 | 547.18   | 965     |      |
| 1584.441 | 6.6   | 350     | 1977 | 735.45   | 1565    |      |
| 1586.796 | 4.5   | 112     | 1761 | 505.56   | 1208    |      |
| 1589.317 | 5.9   | 206     | 1765 | 631.46   | 1513    |      |
| 1597.663 | 12.7  | 663     | 1774 | 1385.64  | 3336    |      |
| 1600.560 | 3.4   | 72      | 2065 | 374.23   | 775     |      |
| 1617.155 | 27.8  | 3399    | 1796 | 2815.07  | 6851    |      |
| 1620.658 | 6.9   | 220     | 3013 | 700.10   | 1018    |      |
| 1622.919 | 8.0   | 1073    | 3950 | 808.21   | 903     |      |
| 1631.919 | 110.6 | 23519   | 2965 | 10795.23 | 16204   |      |



Comment 1

Comment 2

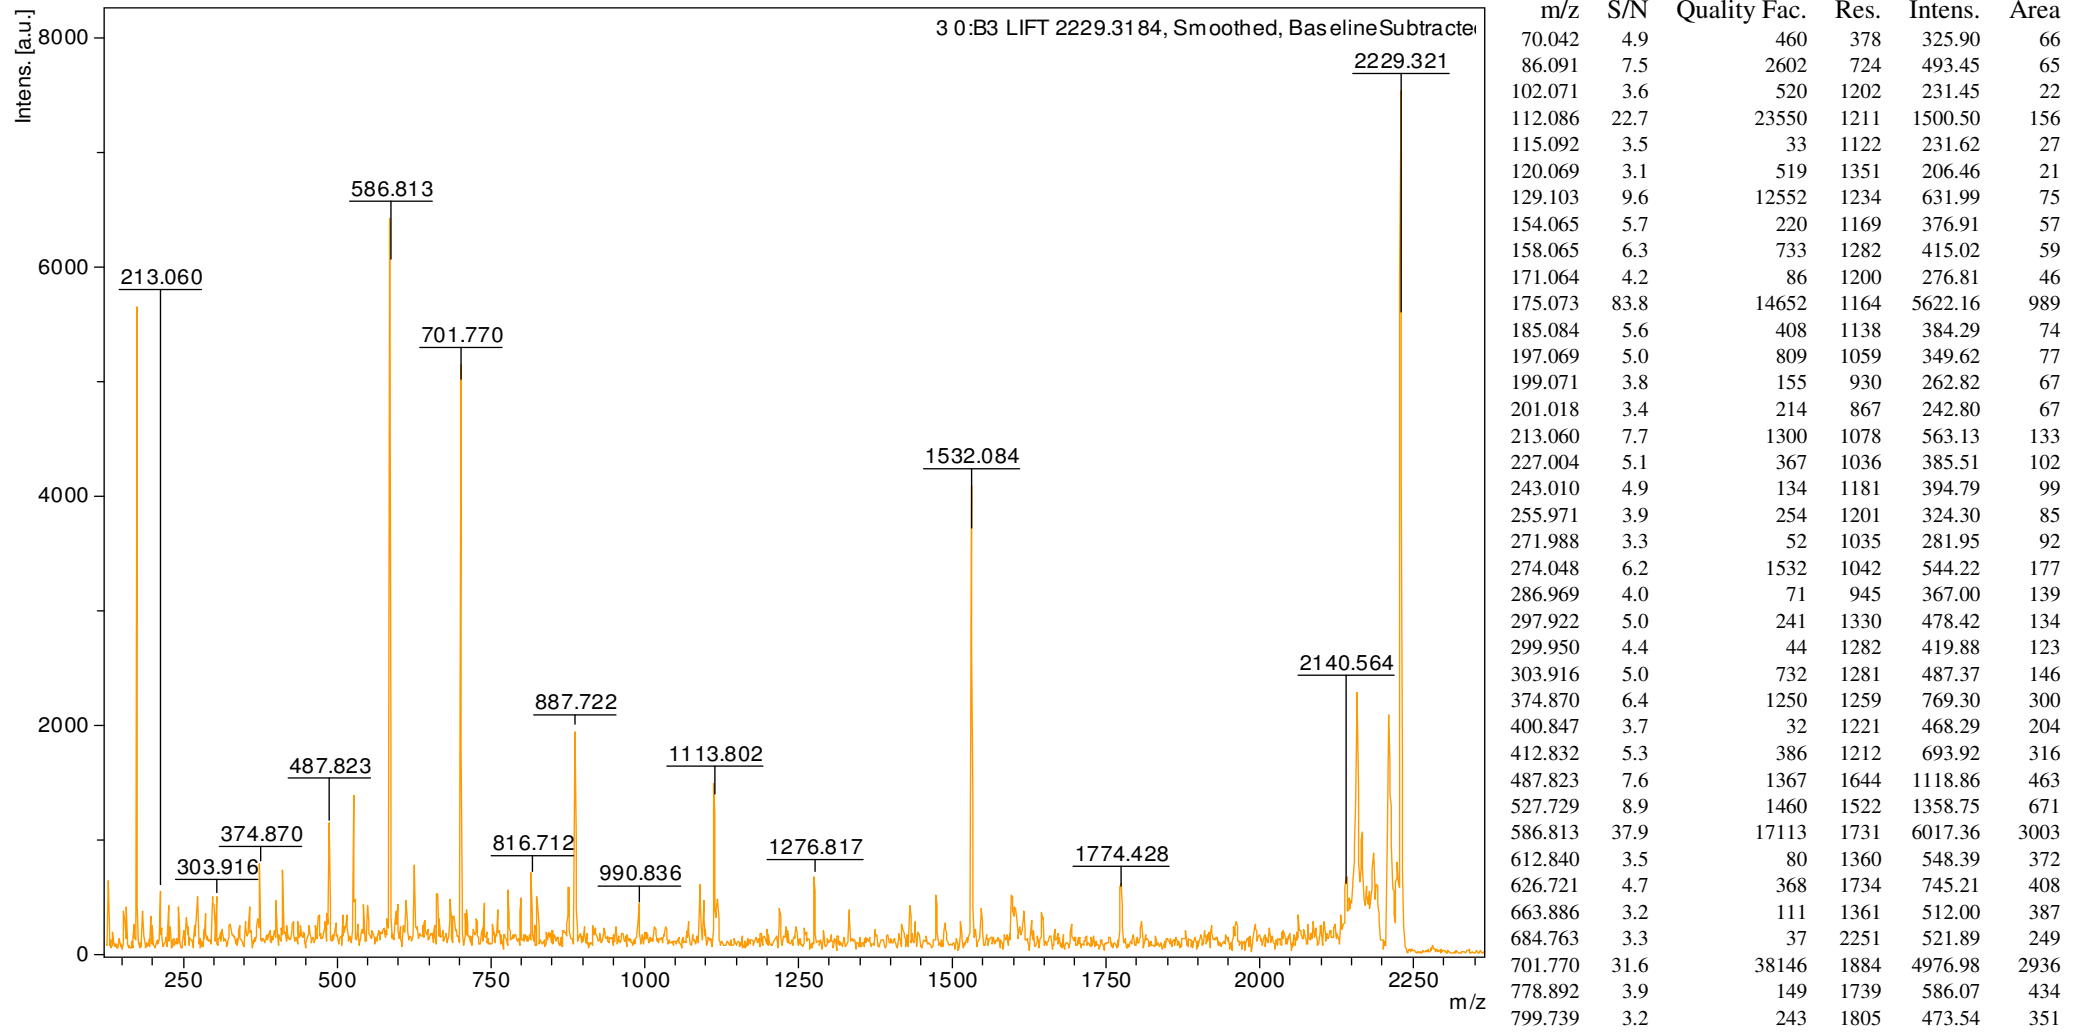

| m/z      | S/N  | Quality Fac. | Res. | Intens. | Area  |
|----------|------|--------------|------|---------|-------|
| 816.712  | 4.5  | 454          | 1913 | 672.37  | 485   |
| 825.875  | 3.6  | 68           | 2084 | 541.57  | 365   |
| 877.840  | 4.1  | 244          | 1565 | 593.96  | 583   |
| 887.722  | 13.7 | 24233        | 2335 | 1969.24 | 1318  |
| 990.836  | 3.1  | 117          | 1971 | 416.33  | 391   |
| 1090.832 | 5.2  | 142          | 2467 | 693.49  | 609   |
| 1096.795 | 3.5  | 138          | 2435 | 474.00  | 426   |
| 1113.802 | 10.2 | 4859         | 2298 | 1357.47 | 1324  |
| 1219.743 | 3.1  | 113          | 2856 | 416.05  | 380   |
| 1276.817 | 5.1  | 1395         | 2289 | 674.79  | 832   |
| 1332.776 | 3.1  | 194          | 2497 | 409.74  | 500   |
| 1431.684 | 3.2  | 123          | 2909 | 444.57  | 529   |
| 1474.992 | 3.7  | 476          | 2224 | 517.13  | 851   |
| 1532.084 | 26.5 | 20840        | 2108 | 3673.87 | 6844  |
| 1546.821 | 3.2  | 38           | 2620 | 441.91  | 675   |
| 1597.726 | 3.8  | 80           | 2558 | 539.44  | 901   |
| 1774.428 | 4.1  | 478          | 1972 | 553.84  | 1478  |
| 2140.564 | 6.1  | 209          | 2379 | 568.07  | 1637  |
| 2145.668 | 3.6  | 198          | 2382 | 331.28  | 956   |
| 2148.640 | 3.4  | 72           | 2613 | 318.59  | 838   |
| 2151.806 | 4.9  | 99           | 2464 | 451.37  | 1263  |
| 2155.250 | 8.2  | 1082         | 3706 | 772.99  | 1439  |
| 2158.361 | 20.3 | 15675        | 2871 | 1889.69 | 4551  |
| 2165.553 | 6.7  | 216          | 2405 | 582.54  | 1682  |
| 2168.392 | 5.7  | 433          | 2688 | 508.40  | 1315  |
| 2170.956 | 3.1  | 92           | 2820 | 282.84  | 699   |
| 2174.102 | 4.6  | 181          | 2415 | 403.23  | 1165  |
| 2178.610 | 4.7  | 197          | 2421 | 411.88  | 1190  |
| 2182.088 | 3.9  | 105          | 2424 | 335.89  | 971   |
| 2185.266 | 8.8  | 364          | 2425 | 748.40  | 2167  |
| 2190.292 | 6.0  | 170          | 2432 | 520.19  | 1506  |
| 2207.882 | 6.1  | 130          | 2454 | 492.14  | 1432  |
| 2210.288 | 19.4 | 8137         | 2726 | 1619.31 | 4246  |
| 2213.753 | 10.2 | 1696         | 3812 | 860.39  | 1616  |
| 2218.143 | 4.4  | 157          | 6434 | 363.98  | 406   |
| 2222.442 | 6.4  | 644          | 4927 | 527.90  | 772   |
| 2224.719 | 5.4  | 35           | 4640 | 447.36  | 695   |
| 2229.321 | 68.0 | 50838        | 3615 | 5564.42 | 11129 |

Comment 1

Comment 2

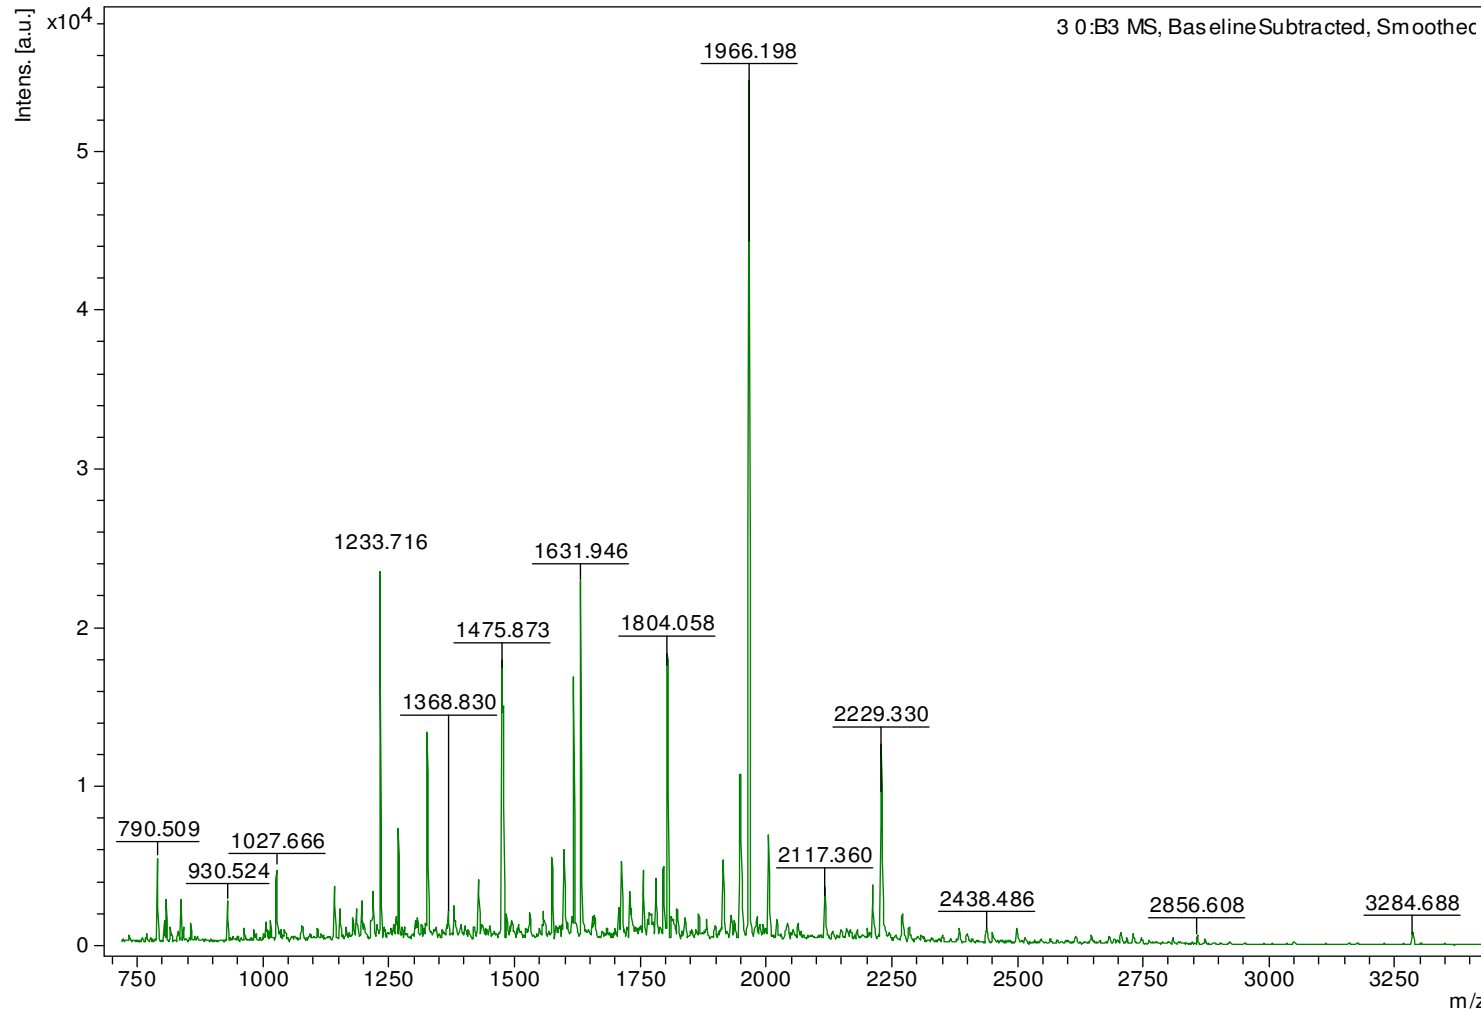

| m/z      | S/N   | Quality Fac. | Res. | Intens.  | Area  |
|----------|-------|--------------|------|----------|-------|
| 790.509  | 31.7  | 63576        | 5626 | 5388.92  | 1331  |
| 804.332  | 7.3   | 628          | 4936 | 1246.93  | 349   |
| 808.445  | 16.0  | 11428        | 5560 | 2753.22  | 699   |
| 837.559  | 15.6  | 14589        | 6098 | 2755.55  | 681   |
| 857.505  | 6.6   | 1667         | 5225 | 1179.25  | 345   |
| 930.524  | 13.7  | 6221         | 5839 | 2665.18  | 797   |
| 1006.645 | 6.1   | 488          | 4904 | 1261.25  | 502   |
| 1015.633 | 6.9   | 2270         | 7095 | 1451.76  | 418   |
| 1027.666 | 22.7  | 7210         | 7008 | 4778.47  | 1424  |
| 1142.674 | 14.3  | 6028         | 6169 | 3465.96  | 1354  |
| 1153.655 | 8.0   | 1498         | 5782 | 1960.22  | 830   |
| 1186.730 | 7.5   | 732          | 6058 | 1897.16  | 805   |
| 1197.658 | 8.0   | 365          | 4650 | 2052.49  | 1141  |
| 1219.644 | 10.2  | 1037         | 4037 | 2680.12  | 1782  |
| 1233.716 | 91.1  | 47471        | 6626 | 24270.98 | 10072 |
| 1269.724 | 25.1  | 15834        | 6787 | 6950.25  | 2966  |
| 1326.788 | 46.9  | 20428        | 6885 | 13464.13 | 6106  |
| 1368.830 | 6.5   | 1074         | 6642 | 1927.21  | 949   |
| 1380.867 | 6.6   | 544          | 5868 | 1965.26  | 1112  |
| 1428.921 | 11.7  | 3694         | 6251 | 3575.18  | 2029  |
| 1475.873 | 55.4  | 26434        | 7013 | 17148.72 | 9244  |
| 1477.849 | 24.6  | 10362        | 6550 | 7606.92  | 4367  |
| 1575.015 | 16.3  | 13125        | 7540 | 5133.41  | 2871  |
| 1598.984 | 19.1  | 10641        | 7281 | 5995.02  | 3642  |
| 1617.928 | 52.3  | 45964        | 7184 | 16354.19 | 10267 |
| 1631.946 | 72.9  | 62393        | 7498 | 22703.40 | 13937 |
| 1712.968 | 16.1  | 15133        | 7709 | 4863.80  | 3209  |
| 1729.003 | 10.2  | 5440         | 8430 | 3078.01  | 1867  |
| 1756.087 | 14.0  | 4531         | 7242 | 4146.67  | 3028  |
| 1781.094 | 9.6   | 810          | 5375 | 2838.58  | 2853  |
| 1797.115 | 11.7  | 7277         | 7642 | 3420.05  | 2497  |
| 1804.058 | 59.3  | 69867        | 7902 | 17300.11 | 12317 |
| 1915.149 | 16.0  | 7863         | 7463 | 4232.01  | 3479  |
| 1947.142 | 12.1  | 581          | 6974 | 3069.99  | 2721  |
| 1949.132 | 32.9  | 16438        | 7609 | 8314.25  | 6919  |
| 1952.152 | 8.2   | 901          | 4978 | 2071.61  | 2588  |
| 1966.198 | 177.6 | 30339        | 7372 | 44013.54 | 38141 |
| 2005.247 | 23.9  | 21912        | 7703 | 5639.58  | 4778  |

---

| m/z      | S/N  | Quality | Fac. | Res.    | Intens. | Area |
|----------|------|---------|------|---------|---------|------|
| 2117.360 | 14.3 | 4351    | 7444 | 2809.44 | 2628    |      |
| 2211.316 | 16.0 | 1493    | 7705 | 2721.93 | 2600    |      |
| 2229.330 | 56.5 | 7475    | 7739 | 9375.13 | 9076    |      |
| 2271.365 | 8.9  | 3328    | 7604 | 1386.29 | 1393    |      |
| 2438.486 | 6.1  | 925     | 6541 | 699.07  | 896     |      |
| 2856.608 | 6.5  | 4103    | 8169 | 361.51  | 476     |      |
| 3284.688 | 16.3 | 4338    | 8332 | 411.68  | 680     |      |

**MATRIX SCIENCE Mascot Search Results**

User : Madhurarekha  
 Email : sanovar@sandor.co.in  
 Search title :  
 MS data file : DATA.TXT  
 Database : SwissProt 2018\_06 (557713 sequences; 200130199 residues)  
 Taxonomy : Bacteria (Eubacteria) (333552 sequences)  
 Timestamp : 11 Jul 2018 at 11:45:45 GMT  
 Warning : **A Peptide summary report will usually give a much clearer picture of MS/MS search results.**  
 Top Score : 123 for **EFTU\_KLEP7**, Elongation factor Tu OS=Klebsiella pneumoniae subsp. pneumoniae (strain ATCC 700721 / MGH 78578)

**Mascot Score Histogram**

Protein score is  $-10 \cdot \log(P)$ , where P is the probability that the observed match is a random event.  
 Protein scores greater than 68 are significant ( $p < 0.05$ ).  
 Protein scores are derived from ions scores as a non-probabilistic basis for ranking protein hits.

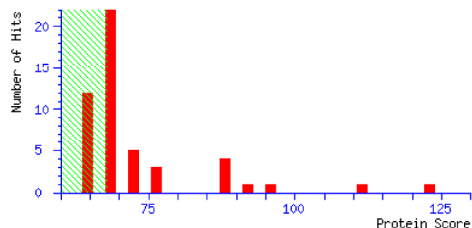

**Protein Summary Report**

Format As  [Help](#)  
 Significance threshold  $p <$   Max. number of hits   
 Preferred taxonomy

**Overview Table**

Click on column header to jump to entry in results list.  
 Move mouse over any indicator to highlight identical peptides.  
 Click on an indicator to see details of individual match.  
 Use check boxes to select sub-set of queries for new search.

Mouse over:

| Hit:                                                               | 1 | 2 | 3 | 4 | 5 | 6 | 7 | 8 | 9 | 10 | 11 | 12 | 13 | 14 | 15 | 16 | 17 | 18 | 19 | 20 |
|--------------------------------------------------------------------|---|---|---|---|---|---|---|---|---|----|----|----|----|----|----|----|----|----|----|----|
| <input checked="" type="checkbox"/> <a href="#">790.5086</a> (1+)  |   |   |   |   |   |   |   |   |   |    |    |    |    |    |    |    |    |    |    |    |
| <input checked="" type="checkbox"/> <a href="#">804.3324</a> (1+)  |   |   |   |   |   |   |   |   |   |    |    |    |    |    |    |    |    |    |    |    |
| <input checked="" type="checkbox"/> <a href="#">808.4445</a> (1+)  |   |   |   |   |   |   |   |   |   |    |    |    |    |    |    |    |    |    |    |    |
| <input checked="" type="checkbox"/> <a href="#">817.4935</a> (1+)  |   |   |   |   |   |   |   |   |   |    |    |    |    |    |    |    |    |    |    |    |
| <input checked="" type="checkbox"/> <a href="#">832.4057</a> (1+)  |   |   |   |   |   |   |   |   |   |    |    |    |    |    |    |    |    |    |    |    |
| <input checked="" type="checkbox"/> <a href="#">837.5595</a> (1+)  |   |   |   |   |   |   |   |   |   |    |    |    |    |    |    |    |    |    |    |    |
| <input checked="" type="checkbox"/> <a href="#">842.5625</a> (1+)  |   |   |   |   |   |   |   |   |   |    |    |    |    |    |    |    |    |    |    |    |
| <input checked="" type="checkbox"/> <a href="#">857.5055</a> (1+)  |   |   |   |   |   |   |   |   |   |    |    |    |    |    |    |    |    |    |    |    |
| <input checked="" type="checkbox"/> <a href="#">930.5245</a> (1+)  |   |   |   |   |   |   |   |   |   |    |    |    |    |    |    |    |    |    |    |    |
| <input checked="" type="checkbox"/> <a href="#">964.5936</a> (1+)  |   |   |   |   |   |   |   |   |   |    |    |    |    |    |    |    |    |    |    |    |
| <input checked="" type="checkbox"/> <a href="#">982.6070</a> (1+)  |   |   |   |   |   |   |   |   |   |    |    |    |    |    |    |    |    |    |    |    |
| <input checked="" type="checkbox"/> <a href="#">986.6133</a> (1+)  |   |   |   |   |   |   |   |   |   |    |    |    |    |    |    |    |    |    |    |    |
| <input checked="" type="checkbox"/> <a href="#">1006.6445</a> (1+) |   |   |   |   |   |   |   |   |   |    |    |    |    |    |    |    |    |    |    |    |
| <input checked="" type="checkbox"/> <a href="#">1015.6326</a> (1+) |   |   |   |   |   |   |   |   |   |    |    |    |    |    |    |    |    |    |    |    |
| <input checked="" type="checkbox"/> <a href="#">1027.6664</a> (1+) |   |   |   |   |   |   |   |   |   |    |    |    |    |    |    |    |    |    |    |    |
| <input checked="" type="checkbox"/> <a href="#">1042.6300</a> (1+) |   |   |   |   |   |   |   |   |   |    |    |    |    |    |    |    |    |    |    |    |
| <input checked="" type="checkbox"/> <a href="#">1078.6445</a> (1+) |   |   |   |   |   |   |   |   |   |    |    |    |    |    |    |    |    |    |    |    |
| <input checked="" type="checkbox"/> <a href="#">1107.8344</a> (1+) |   |   |   |   |   |   |   |   |   |    |    |    |    |    |    |    |    |    |    |    |
| <input checked="" type="checkbox"/> <a href="#">1142.6742</a> (1+) |   |   |   |   |   |   |   |   |   |    |    |    |    |    |    |    |    |    |    |    |
| <input checked="" type="checkbox"/> <a href="#">1153.6546</a> (1+) |   |   |   |   |   |   |   |   |   |    |    |    |    |    |    |    |    |    |    |    |
| <input checked="" type="checkbox"/> <a href="#">1165.6966</a> (1+) |   |   |   |   |   |   |   |   |   |    |    |    |    |    |    |    |    |    |    |    |
| <input checked="" type="checkbox"/> <a href="#">1179.7073</a> (1+) |   |   |   |   |   |   |   |   |   |    |    |    |    |    |    |    |    |    |    |    |
| <input checked="" type="checkbox"/> <a href="#">1186.7303</a> (1+) |   |   |   |   |   |   |   |   |   |    |    |    |    |    |    |    |    |    |    |    |
| <input checked="" type="checkbox"/> <a href="#">1197.6582</a> (1+) |   |   |   |   |   |   |   |   |   |    |    |    |    |    |    |    |    |    |    |    |
| <input checked="" type="checkbox"/> <a href="#">1214.7097</a> (1+) |   |   |   |   |   |   |   |   |   |    |    |    |    |    |    |    |    |    |    |    |
| <input checked="" type="checkbox"/> <a href="#">1219.6443</a> (1+) |   |   |   |   |   |   |   |   |   |    |    |    |    |    |    |    |    |    |    |    |
| <input checked="" type="checkbox"/> <a href="#">1233.7159</a> (1+) | ● | ● | ● |   |   |   |   | ● |   |    |    |    |    |    |    |    |    |    |    |    |
| <input checked="" type="checkbox"/> <a href="#">1240.6944</a> (1+) |   |   |   |   |   |   |   |   |   |    |    |    |    |    |    |    |    |    |    |    |
| <input checked="" type="checkbox"/> <a href="#">1265.7392</a> (1+) |   |   |   |   |   |   |   |   |   |    |    |    |    |    |    |    |    |    |    |    |
| <input checked="" type="checkbox"/> <a href="#">1269.7243</a> (1+) |   |   |   |   |   |   |   |   |   |    |    |    |    |    |    |    |    |    |    |    |





2717.3922 2716.3849 2716.3305 20.0 334 - 356 0 --- K.DDLLEVAMELEHIALNDPYFIEK.K

**No match to:** 804.3324, 832.4057, 837.5595, 842.5625, 857.5055, 930.5245, 964.5936, 982.6070, 986.6133, 1006.6445, 1027.6664, 1042.6300, 1078.6445, 1107.8344, 1142.6742, 1153.6546, 1165.6966, 1179.7073, 1197.6582, 1214.7097, 1233.7159, 1240.6944, 1269.7243, 1368.8298, 1380.8667, 1428.9212, 1450.8531, 1475.8727, 1479.8489, 1484.8980, 1530.8700, 1557.9283, 1575.0154, 1617.9280, 1654.9735, 1708.0185, 1712.9684, 1724.0543, 1729.0035, 1733.0874, 1756.0868, 1781.0936, 1797.1145, 1804.0575, 1813.1035, 1839.0932, 1850.0717, 1882.1314, 1900.1334, 1915.1486, 1931.1352, 1947.1417, 1949.1320, 1952.1522, 1966.1980, 1981.1803, 1994.1847, 2021.1854, 2042.2539, 2044.2373, 2064.3065, 2117.3601, 2149.2508, 2181.2406, 2211.3162, 2215.2391, 2229.3298, 2271.3649, 2284.3753, 2384.2549, 2399.3191, 2438.4857, 2450.5041, 2498.5023, 2615.5335, 2645.5873, 2681.5950, 2705.4362, 2729.6061, 2745.6012, 2808.6023, 2856.6076, 2872.6380, 3048.6449, 3284.6878

4. [EFTU\\_AERHH](#) Mass: 43525 Score: 94 Expect: 0.00015 Matches: 7

Elongation factor Tu OS=Aeromonas hydrophila subsp. hydrophila (strain ATCC 7966 / DSM 30187 / JCM 1027 / KCTC 2358 / NCIMB 9240)

| Observed  | Mr (expt) | Mr (calc) | ppm  | Start | End | Miss | Ions | Peptide                                         |
|-----------|-----------|-----------|------|-------|-----|------|------|-------------------------------------------------|
| 837.5595  | 836.5522  | 836.4868  | 78.2 | 118   | 124 | 0    | ---  | R.EHILLGR.Q                                     |
| 1233.7159 | 1232.7086 | 1232.6091 | 80.8 | 326   | 334 | 0    | 10   | K.GYRPFYFR.T                                    |
| 1575.0154 | 1574.0081 | 1573.9304 | 49.4 | 290   | 304 | 0    | ---  | R.GQVLAKPTIKPHTK.F                              |
| 1729.0035 | 1727.9962 | 1727.8366 | 92.4 | 305   | 319 | 1    | ---  | K.FESEVYVLSKEGGR.H                              |
| 1966.1980 | 1965.1907 | 1965.0207 | 86.5 | 189   | 205 | 0    | 64   | K.ILELAGHLDTIPEPER.A                            |
| 2729.6061 | 2728.5988 | 2728.3346 | 96.8 | 91    | 117 | 0    | ---  | K.NMITGAAQMDGAILVVAATDGFMPQTR.E                 |
| 2745.6012 | 2744.5939 | 2744.3296 | 96.3 | 91    | 117 | 0    | ---  | K.NMITGAAQMDGAILVVAATDGFMPQTR.E + Oxidation (M) |

**No match to:** 790.5086, 804.3324, 808.4445, 817.4935, 832.4057, 842.5625, 857.5055, 930.5245, 964.5936, 982.6070, 986.6133, 1006.6445, 1015.6326, 1027.6664, 1042.6300, 1078.6445, 1107.8344, 1142.6742, 1153.6546, 1165.6966, 1179.7073, 1186.7303, 1197.6582, 1214.7097, 1219.6443, 1240.6944, 1265.7392, 1269.7243, 1326.7883, 1368.8298, 1380.8667, 1428.9212, 1450.8531, 1475.8727, 1477.8489, 1484.8980, 1530.8700, 1557.9283, 1598.9839, 1617.9280, 1631.9464, 1654.9735, 1658.9825, 1708.0185, 1712.9684, 1724.0543, 1733.0874, 1756.0868, 1781.0936, 1797.1145, 1804.0575, 1813.1035, 1824.0974, 1839.0932, 1850.0717, 1882.1314, 1900.1334, 1915.1486, 1931.1352, 1938.1476, 1947.1417, 1949.1320, 1952.1522, 1981.1803, 1994.1847, 2005.2465, 2021.1854, 2042.2539, 2044.2373, 2064.3065, 2117.3601, 2149.2508, 2181.2406, 2211.3162, 2215.2391, 2229.3298, 2271.3649, 2284.3753, 2384.2549, 2399.3191, 2438.4857, 2450.5041, 2498.5023, 2615.5335, 2645.5873, 2681.5950, 2705.4362, 2717.3922, 2808.6023, 2856.6076, 2872.6380, 3048.6449, 3284.6878

5. [EFTU\\_COXBN](#) Mass: 43613 Score: 88 Expect: 0.00058 Matches: 8

Elongation factor Tu OS=Coxiella burnetii (strain Dugway 5J108-111) OX=434922 GN=tuf1 PE=3 SV=1

| Observed  | Mr (expt) | Mr (calc) | ppm  | Start | End | Miss | Ions | Peptide                              |
|-----------|-----------|-----------|------|-------|-----|------|------|--------------------------------------|
| 817.4935  | 816.4862  | 816.4090  | 94.6 | 286   | 291 | 1    | ---  | K.REEVER.G                           |
| 1186.7303 | 1185.7230 | 1185.6969 | 22.0 | 386   | 397 | 1    | ---  | R.TVGAGVVTKIIE.-                     |
| 1326.7883 | 1325.7810 | 1325.7231 | 43.7 | 306   | 316 | 1    | ---  | K.KFEAEIYVLSK.E                      |
| 1475.8727 | 1474.8655 | 1474.8606 | 3.26 | 26    | 39  | 1    | 5    | K.TTLTAALTKVLSK.Y                    |
| 1631.9464 | 1630.9392 | 1630.7699 | 104  | 46    | 59  | 1    | 63   | K.AFDQIDNAPERAR.G                    |
| 1712.9684 | 1711.9611 | 1711.9178 | 25.3 | 362   | 377 | 0    | ---  | K.VTVELIAPVAMDEGLR.F                 |
| 1729.0035 | 1727.9962 | 1727.9128 | 48.3 | 362   | 377 | 0    | ---  | K.VTVELIAPVAMDEGLR.F + Oxidation (M) |
| 1824.0974 | 1823.0901 | 1822.9438 | 80.2 | 9     | 25  | 0    | ---  | R.EKPHVNVGTIGHVDHGK.T                |

**No match to:** 790.5086, 804.3324, 808.4445, 832.4057, 837.5595, 842.5625, 857.5055, 930.5245, 964.5936, 982.6070, 986.6133, 1006.6445, 1015.6326, 1027.6664, 1042.6300, 1078.6445, 1107.8344, 1142.6742, 1153.6546, 1165.6966, 1179.7073, 1197.6582, 1214.7097, 1219.6443, 1233.7159, 1240.6944, 1265.7392, 1269.7243, 1368.8298, 1380.8667, 1428.9212, 1450.8531, 1477.8489, 1484.8980, 1530.8700, 1557.9283, 1575.0154, 1598.9839, 1617.9280, 1654.9735, 1658.9825, 1708.0185, 1724.0543, 1733.0874, 1756.0868, 1781.0936, 1797.1145, 1804.0575, 1813.1035, 1839.0932, 1850.0717, 1882.1314, 1900.1334, 1915.1486, 1931.1352, 1938.1476, 1947.1417, 1949.1320, 1952.1522, 1966.1980, 1981.1803, 1994.1847, 2005.2465, 2021.1854, 2042.2539, 2044.2373, 2064.3065, 2117.3601, 2149.2508, 2181.2406, 2211.3162, 2215.2391, 2229.3298, 2271.3649, 2284.3753, 2384.2549, 2399.3191, 2438.4857, 2450.5041, 2498.5023, 2615.5335, 2645.5873, 2681.5950, 2705.4362, 2717.3922, 2729.6061, 2745.6012, 2808.6023, 2856.6076, 2872.6380, 3048.6449, 3284.6878

6. [EFTU\\_COXBR](#) Mass: 43613 Score: 88 Expect: 0.00058 Matches: 8

Elongation factor Tu OS=Coxiella burnetii (strain RSA 331 / Henzlerling II) OX=360115 GN=tuf1 PE=3 SV=1

| Observed  | Mr (expt) | Mr (calc) | ppm  | Start | End | Miss | Ions | Peptide                              |
|-----------|-----------|-----------|------|-------|-----|------|------|--------------------------------------|
| 817.4935  | 816.4862  | 816.4090  | 94.6 | 286   | 291 | 1    | ---  | K.REEVER.G                           |
| 1186.7303 | 1185.7230 | 1185.6969 | 22.0 | 386   | 397 | 1    | ---  | R.TVGAGVVTKIIE.-                     |
| 1326.7883 | 1325.7810 | 1325.7231 | 43.7 | 306   | 316 | 1    | ---  | K.KFEAEIYVLSK.E                      |
| 1475.8727 | 1474.8655 | 1474.8606 | 3.26 | 26    | 39  | 1    | 5    | K.TTLTAALTKVLSK.Y                    |
| 1631.9464 | 1630.9392 | 1630.7699 | 104  | 46    | 59  | 1    | 63   | K.AFDQIDNAPERAR.G                    |
| 1712.9684 | 1711.9611 | 1711.9178 | 25.3 | 362   | 377 | 0    | ---  | K.VTVELIAPVAMDEGLR.F                 |
| 1729.0035 | 1727.9962 | 1727.9128 | 48.3 | 362   | 377 | 0    | ---  | K.VTVELIAPVAMDEGLR.F + Oxidation (M) |
| 1824.0974 | 1823.0901 | 1822.9438 | 80.2 | 9     | 25  | 0    | ---  | R.EKPHVNVGTIGHVDHGK.T                |

**No match to:** 790.5086, 804.3324, 808.4445, 832.4057, 837.5595, 842.5625, 857.5055, 930.5245, 964.5936, 982.6070, 986.6133, 1006.6445, 1015.6326, 1027.6664, 1042.6300, 1078.6445, 1107.8344, 1142.6742, 1153.6546, 1165.6966, 1179.7073, 1197.6582, 1214.7097, 1219.6443, 1233.7159, 1240.6944, 1265.7392, 1269.7243, 1368.8298, 1380.8667, 1428.9212, 1450.8531, 1477.8489, 1484.8980, 1530.8700, 1557.9283, 1575.0154, 1598.9839, 1617.9280, 1654.9735, 1658.9825, 1708.0185, 1724.0543, 1733.0874, 1756.0868, 1781.0936, 1797.1145, 1804.0575, 1813.1035, 1839.0932, 1850.0717, 1882.1314, 1900.1334, 1915.1486, 1931.1352, 1938.1476, 1947.1417, 1949.1320, 1952.1522, 1966.1980, 1981.1803, 1994.1847, 2005.2465, 2021.1854, 2042.2539, 2044.2373, 2064.3065, 2117.3601, 2149.2508, 2181.2406, 2211.3162, 2215.2391, 2229.3298, 2271.3649, 2284.3753, 2384.2549, 2399.3191, 2438.4857, 2450.5041, 2498.5023, 2615.5335, 2645.5873, 2681.5950, 2705.4362, 2717.3922, 2729.6061, 2745.6012, 2808.6023, 2856.6076, 2872.6380, 3048.6449, 3284.6878

7. [EFTU\\_COXBU](#) Mass: 43613 Score: 88 Expect: 0.00058 Matches: 8

Elongation factor Tu OS=Coxiella burnetii (strain RSA 493 / Nine Mile phase I) OX=227377 GN=tufA PE=1 SV=1

| Observed  | Mr (expt) | Mr (calc) | ppm  | Start | End | Miss | Ions | Peptide                              |
|-----------|-----------|-----------|------|-------|-----|------|------|--------------------------------------|
| 817.4935  | 816.4862  | 816.4090  | 94.6 | 286   | 291 | 1    | ---  | K.REEVER.G                           |
| 1186.7303 | 1185.7230 | 1185.6969 | 22.0 | 386   | 397 | 1    | ---  | R.TVGAGVVTKIIE.-                     |
| 1326.7883 | 1325.7810 | 1325.7231 | 43.7 | 306   | 316 | 1    | ---  | K.KFEAEIYVLSK.E                      |
| 1475.8727 | 1474.8655 | 1474.8606 | 3.26 | 26    | 39  | 1    | 5    | K.TTLTAALTKVLSK.Y                    |
| 1631.9464 | 1630.9392 | 1630.7699 | 104  | 46    | 59  | 1    | 63   | K.AFDQIDNAPERAR.G                    |
| 1712.9684 | 1711.9611 | 1711.9178 | 25.3 | 362   | 377 | 0    | ---  | K.VTVELIAPVAMDEGLR.F                 |
| 1729.0035 | 1727.9962 | 1727.9128 | 48.3 | 362   | 377 | 0    | ---  | K.VTVELIAPVAMDEGLR.F + Oxidation (M) |
| 1824.0974 | 1823.0901 | 1822.9438 | 80.2 | 9     | 25  | 0    | ---  | R.EKPHVNVGTIGHVDHGK.T                |

**No match to:** 790.5086, 804.3324, 808.4445, 832.4057, 837.5595, 842.5625, 857.5055, 930.5245, 964.5936, 982.6070, 986.6133, 1006.6445, 1015.6326, 1027.6664, 1042.6300, 1078.6445, 1107.8344, 1142.6742, 1153.6546, 1165.6966, 1179.7073, 1197.6582, 1214.7097, 1219.6443, 1233.7159, 1240.6944, 1265.7392, 1269.7243, 1368.8298, 1380.8667, 1428.9212, 1450.8531, 1477.8489, 1484.8980, 1530.8700, 1557.9283, 1575.0154, 1598.9839, 1617.9280, 1654.9735, 1658.9825, 1708.0185, 1724.0543, 1733.0874, 1756.0868, 1781.0936, 1797.1145, 1804.0575, 1813.1035, 1839.0932, 1850.0717, 1882.1314, 1900.1334, 1915.1486, 1931.1352, 1938.1476, 1947.1417, 1949.1320, 1952.1522, 1966.1980, 1981.1803, 1994.1847, 2005.2465, 2021.1854, 2042.2539, 2044.2373, 2064.3065, 2117.3601, 2149.2508, 2181.2406, 2211.3162, 2215.2391, 2229.3298, 2271.3649, 2284.3753, 2384.2549, 2399.3191, 2438.4857, 2450.5041, 2498.5023, 2615.5335, 2645.5873, 2681.5950, 2705.4362, 2717.3922, 2729.6061, 2745.6012, 2808.6023, 2856.6076, 2872.6380, 3048.6449, 3284.6878

8. [EFTU\\_MARHV](#) Mass: 44034 Score: 87 Expect: 0.00071 Matches: 5

Elongation factor Tu OS=Marinobacter hydrocarbonoclasticus (strain ATCC 700491 / DSM 11845 / VT8) OX=351348 GN=tuf PE=3 SV=1

| Observed | Mr (expt) | Mr (calc) | ppm | Start | End | Miss | Ions | Peptide |
|----------|-----------|-----------|-----|-------|-----|------|------|---------|
|----------|-----------|-----------|-----|-------|-----|------|------|---------|



1027.6664 1026.6591 1026.5822 74.9 275 - 284 0 --- R.AGENVGVLLR.G  
 1233.7159 1232.7086 1232.6091 80.8 330 - 338 0 10 K.GYRPFYFR.T  
 1631.9464 1630.9392 1630.7699 104 47 - 60 1 63 R.AFDQIDNAPERAR.G  
 1658.9825 1657.9752 1657.8199 93.7 196 - 209 0 --- K.LVEALDDYIPEPER.A  
 2808.6023 2807.5950 2807.2711 115 92 - 118 0 --- K.NMITGAAQMDGAILVCSAADGMPQTR.E + 2 Oxidation (M)

No match to: 790.5086, 804.3324, 808.4445, 817.4935, 832.4057, 837.5595, 842.5625, 857.5055, 930.5245, 964.5936, 982.6070, 986.6133, 1006.6445, 1015.6326, 1042.6300, 1078.6445, 1107.8344, 1142.6742, 1153.6546, 1165.6966, 1179.7073, 1186.7303, 1197.6582, 1214.7097, 1219.6443, 1240.6944, 1265.7392, 1269.7243, 1326.7883, 1368.8298, 1380.8667, 1428.9212, 1450.8531, 1475.8727, 1477.8489, 1484.8980, 1530.8700, 1557.9283, 1575.0154, 1598.9839, 1617.9280, 1654.9735, 1708.0185, 1712.9684, 1724.0543, 1729.0035, 1733.0874, 1756.0868, 1781.0936, 1797.1145, 1804.0575, 1813.1035, 1824.0974, 1839.0932, 1850.0717, 1882.1314, 1900.1334, 1915.1486, 1931.1352, 1938.1476, 1947.1417, 1949.1320, 1952.1522, 1966.1980, 1981.1803, 1994.1847, 2005.2465, 2021.1854, 2042.2539, 2044.2373, 2064.3065, 2117.3601, 2149.2508, 2181.2406, 2211.3162, 2215.2391, 2229.3298, 2271.3649, 2284.3753, 2384.2549, 2399.3191, 2438.4857, 2450.5041, 2498.5023, 2615.5335, 2645.5873, 2681.5950, 2705.4362, 2717.3922, 2729.6061, 2745.6012, 2856.6076, 2872.6380, 3048.6449, 3284.6878

9. [DNAK\\_BRADU](#) Mass: 68364 Score: 76 Expect: 0.0076 Matches: 7

Chaperone protein DnaK OS=Bradyrhizobium diazoefficiens (strain JCM 10833 / IAM 13628 / NBRC 14792 / USDA 110) OX=224911 GN=dnaK

| Observed  | Mr (expt) | Mr (calc) | ppm  | Start | End   | Miss | Ions | Peptide                                     |
|-----------|-----------|-----------|------|-------|-------|------|------|---------------------------------------------|
| 1015.6326 | 1014.6253 | 1014.5644 | 60.0 | 290   | - 297 | 1    | ---  | K.HLTMKLTRA + Oxidation (M)                 |
| 1078.6445 | 1077.6372 | 1077.5488 | 82.0 | 583   | - 592 | 0    | ---  | K.TQTLAQSMK.L                               |
| 1186.7303 | 1185.7230 | 1185.6102 | 95.2 | 242   | - 251 | 1    | ---  | K.EQQINLNRDK.L                              |
| 1658.9825 | 1657.9752 | 1657.8320 | 86.4 | 448   | - 462 | 0    | ---  | K.MLGQFDLMGIPPAPR.G + Oxidation (M)         |
| 1966.1980 | 1965.1907 | 1964.9547 | 120  | 4     | - 22  | 0    | 36   | K.VIGIDLGTNSCAVMDGK.N + Oxidation (M)       |
| 2229.3298 | 2228.3225 | 2228.1835 | 62.4 | 318   | - 340 | 1    | 25   | K.ALKADAGVTAGEIGEIVLVGGMSR.M                |
| 2450.5041 | 2449.4968 | 2449.1440 | 144  | 441   | - 462 | 1    | ---  | R.EMADNKMLGQFDLMGIPPAPR.G + 3 Oxidation (M) |

No match to: 790.5086, 804.3324, 808.4445, 817.4935, 832.4057, 837.5595, 842.5625, 857.5055, 930.5245, 964.5936, 982.6070, 986.6133, 1006.6445, 1015.6326, 1027.6664, 1042.6300, 1107.8344, 1142.6742, 1153.6546, 1165.6966, 1179.7073, 1197.6582, 1214.7097, 1219.6443, 1233.7159, 1240.6944, 1265.7392, 1269.7243, 1326.7883, 1368.8298, 1380.8667, 1428.9212, 1450.8531, 1475.8727, 1477.8489, 1484.8980, 1530.8700, 1557.9283, 1575.0154, 1598.9839, 1617.9280, 1631.9464, 1654.9735, 1708.0185, 1712.9684, 1724.0543, 1729.0035, 1733.0874, 1756.0868, 1781.0936, 1797.1145, 1804.0575, 1813.1035, 1824.0974, 1839.0932, 1850.0717, 1882.1314, 1900.1334, 1915.1486, 1931.1352, 1938.1476, 1947.1417, 1949.1320, 1952.1522, 1981.1803, 1994.1847, 2005.2465, 2021.1854, 2042.2539, 2044.2373, 2064.3065, 2117.3601, 2149.2508, 2181.2406, 2211.3162, 2215.2391, 2271.3649, 2284.3753, 2384.2549, 2399.3191, 2438.4857, 2498.5023, 2615.5335, 2645.5873, 2681.5950, 2705.4362, 2717.3922, 2729.6061, 2745.6012, 2808.6023, 2856.6076, 2872.6380, 3048.6449, 3284.6878

10. [ADH\\_THEBR](#) Mass: 37851 Score: 75 Expect: 0.0096 Matches: 7

NADP-dependent isopropanol dehydrogenase OS=Thermoanaerobacter brockii OX=29323 GN=adh PE=1 SV=1

| Observed  | Mr (expt) | Mr (calc) | ppm  | Start | End   | Miss | Ions | Peptide                          |
|-----------|-----------|-----------|------|-------|-------|------|------|----------------------------------|
| 1042.6300 | 1041.6227 | 1041.5502 | 69.7 | 292   | - 301 | 1    | ---  | K.GGLCPGGRLR.M                   |
| 1214.7097 | 1213.7024 | 1213.6199 | 68.0 | 1     | - 11  | 1    | ---  | -MKGFAMLSIGK.V + 2 Oxidation (M) |
| 1240.6944 | 1239.6871 | 1239.6355 | 41.6 | 333   | - 342 | 1    | ---  | K.AFMLMKDKPK.D + 2 Oxidation (M) |
| 1530.8700 | 1529.8628 | 1529.7483 | 74.8 | 279   | - 291 | 1    | ---  | R.LEWCGGMHAKTK.G                 |
| 1631.9464 | 1630.9392 | 1630.7872 | 93.2 | 220   | - 234 | 0    | 48   | K.DGPIESQIMNLTGK.G               |
| 2229.3298 | 2228.3225 | 2228.0545 | 120  | 92    | - 111 | 1    | ---  | R.TSEVQRGYHQHSGGMLAGWK.F         |
| 3048.6449 | 3047.6376 | 3047.5135 | 40.7 | 53    | - 80  | 1    | ---  | R.HNMILGHEAVGEVVEVGEVSKDFKPGDR.V |

No match to: 790.5086, 804.3324, 808.4445, 817.4935, 832.4057, 837.5595, 842.5625, 857.5055, 930.5245, 964.5936, 982.6070, 986.6133, 1006.6445, 1015.6326, 1027.6664, 1078.6445, 1107.8344, 1142.6742, 1153.6546, 1165.6966, 1179.7073, 1186.7303, 1197.6582, 1214.7097, 1219.6443, 1233.7159, 1240.6944, 1265.7392, 1269.7243, 1326.7883, 1368.8298, 1380.8667, 1428.9212, 1450.8531, 1475.8727, 1477.8489, 1484.8980, 1530.8700, 1557.9283, 1575.0154, 1598.9839, 1617.9280, 1631.9464, 1654.9735, 1658.9825, 1708.0185, 1712.9684, 1724.0543, 1729.0035, 1733.0874, 1756.0868, 1781.0936, 1797.1145, 1804.0575, 1813.1035, 1824.0974, 1839.0932, 1850.0717, 1882.1314, 1900.1334, 1915.1486, 1931.1352, 1938.1476, 1947.1417, 1949.1320, 1952.1522, 1966.1980, 1981.1803, 1994.1847, 2005.2465, 2021.1854, 2042.2539, 2044.2373, 2064.3065, 2117.3601, 2149.2508, 2181.2406, 2211.3162, 2215.2391, 2271.3649, 2284.3753, 2384.2549, 2399.3191, 2438.4857, 2450.5041, 2498.5023, 2615.5335, 2645.5873, 2681.5950, 2705.4362, 2717.3922, 2729.6061, 2745.6012, 2808.6023, 2856.6076, 2872.6380, 3048.6449, 3284.6878

11. [TOP1\\_STASI](#) Mass: 79764 Score: 75 Expect: 0.01 Matches: 12

DNA topoisomerase I OS=Staphylococcus saprophyticus subsp. saprophyticus (strain ATCC 15305 / DSM 20229) OX=342451 GN=topA PE=3

| Observed  | Mr (expt) | Mr (calc) | ppm   | Start | End   | Miss | Ions | Peptide                            |
|-----------|-----------|-----------|-------|-------|-------|------|------|------------------------------------|
| 1006.6445 | 1005.6372 | 1005.5607 | 76.1  | 401   | - 409 | 1    | ---  | R.ANGQTIKFK.G                      |
| 1186.7303 | 1185.7230 | 1185.6003 | 104   | 358   | - 366 | 1    | ---  | K.NFLTRDQHR.L                      |
| 1240.6944 | 1239.6871 | 1239.5924 | 76.4  | 184   | - 192 | 0    | ---  | R.NFKPEEYWK.I                      |
| 1269.7243 | 1268.7171 | 1268.6976 | 15.4  | 2     | - 13  | 0    | ---  | M.AENLVIVESPAK.A                   |
| 1368.8298 | 1367.8225 | 1367.8249 | -1.72 | 167   | - 178 | 1    | ---  | R.VQSVLRVIDR.E                     |
| 1450.8531 | 1449.8459 | 1449.7874 | 40.3  | 27    | - 39  | 1    | ---  | K.VIASMGHVRDLPR.S                  |
| 1475.8727 | 1474.8655 | 1474.7086 | 106   | 127   | - 139 | 0    | 26   | R.GIEMELVDAQQAR.R + Oxidation (M)  |
| 1631.9464 | 1630.9392 | 1630.8097 | 79.4  | 127   | - 140 | 1    | 29   | R.GIEMELVDAQQARR.I + Oxidation (M) |
| 1850.0717 | 1849.0644 | 1848.9264 | 74.6  | 124   | - 139 | 1    | ---  | K.HPRGIEMELVDAQQAR.R               |
| 1882.1314 | 1881.1241 | 1880.9740 | 79.8  | 274   | - 289 | 1    | ---  | K.TMMLAQLYEGIDLKQ                  |
| 1938.1476 | 1937.1403 | 1936.9351 | 106   | 334   | - 351 | 0    | ---  | K.GQQDQAHEAIRPSSTLR.T              |
| 2229.3298 | 2228.3225 | 2228.0419 | 126   | 40    | - 58  | 1    | ---  | R.SQMGVDAENDYEPKYIITIR.G           |

No match to: 790.5086, 804.3324, 808.4445, 817.4935, 832.4057, 837.5595, 842.5625, 857.5055, 930.5245, 964.5936, 982.6070, 986.6133, 1006.6445, 1015.6326, 1027.6664, 1042.6300, 1078.6445, 1107.8344, 1142.6742, 1153.6546, 1165.6966, 1179.7073, 1197.6582, 1214.7097, 1219.6443, 1233.7159, 1265.7392, 1326.7883, 1368.8298, 1380.8667, 1428.9212, 1477.8489, 1484.8980, 1530.8700, 1557.9283, 1575.0154, 1598.9839, 1617.9280, 1654.9735, 1658.9825, 1708.0185, 1712.9684, 1724.0543, 1729.0035, 1733.0874, 1756.0868, 1781.0936, 1797.1145, 1804.0575, 1813.1035, 1824.0974, 1839.0932, 1900.1334, 1915.1486, 1931.1352, 1947.1417, 1949.1320, 1952.1522, 1966.1980, 1981.1803, 1994.1847, 2005.2465, 2021.1854, 2042.2539, 2044.2373, 2064.3065, 2117.3601, 2149.2508, 2181.2406, 2211.3162, 2215.2391, 2271.3649, 2284.3753, 2384.2549, 2399.3191, 2438.4857, 2450.5041, 2498.5023, 2615.5335, 2645.5873, 2681.5950, 2705.4362, 2717.3922, 2729.6061, 2745.6012, 2808.6023, 2856.6076, 2872.6380, 3048.6449, 3284.6878

12. [HSCA\\_AROAE](#) Mass: 66854 Score: 74 Expect: 0.014 Matches: 12

Chaperone protein HscA homolog OS=Aromatoleum aromaticum (strain EbN1) OX=76114 GN=hscA PE=3 SV=1

| Observed  | Mr (expt) | Mr (calc) | ppm    | Start | End   | Miss | Ions | Peptide                                     |
|-----------|-----------|-----------|--------|-------|-------|------|------|---------------------------------------------|
| 808.4445  | 807.4373  | 807.4425  | -6.52  | 89    | - 95  | 1    | ---  | R.FMGRGLK.D                                 |
| 832.4057  | 831.3984  | 831.4450  | -56.00 | 165   | - 172 | 1    | ---  | R.QATKDAK.L                                 |
| 857.5055  | 856.4982  | 856.5130  | -17.28 | 587   | - 594 | 1    | ---  | K.KGIEALAR.A                                |
| 964.5936  | 963.5863  | 963.5171  | 71.8   | 81    | - 88  | 1    | ---  | K.NTIMSVKR.F + Oxidation (M)                |
| 1240.6944 | 1239.6871 | 1239.7299 | -34.52 | 169   | - 180 | 1    | ---  | K.DAAKLAGLNVLRL.L                           |
| 1368.8298 | 1367.8225 | 1367.7409 | 59.7   | 321   | - 333 | 1    | ---  | K.VLRDAGLGPEDVK.G                           |
| 1617.9280 | 1616.9207 | 1616.8093 | 68.9   | 51    | - 64  | 1    | ---  | R.SMLPSIVRYHADGR.I + Oxidation (M)          |
| 1824.0974 | 1823.0901 | 1822.9577 | 72.6   | 416   | - 431 | 1    | ---  | R.NSTLPIARAQEFFTFK.D                        |
| 2149.2508 | 2148.2435 | 2148.0092 | 109    | 432   | - 450 | 1    | ---  | K.DGQTAMAFHVQGEREMVK.D + Oxidation (M)      |
| 2211.3162 | 2210.3090 | 2209.9950 | 142    | 96    | - 115 | 0    | ---  | K.DVSHVESTPYDFIDAGMVR.L + Oxidation (M)     |
| 2229.3298 | 2228.3225 | 2228.1405 | 81.7   | 38    | - 58  | 1    | 33   | R.NGIATVCLADEAGRSMLPSIVR.Y                  |
| 2399.3191 | 2398.3118 | 2398.2162 | 39.9   | 65    | - 87  | 1    | ---  | R.IEVGQTAAAHHTDPKNTIMSVKR.R + Oxidation (M) |

**No match to:** 790.5086, 804.3324, 817.4935, 837.5595, 842.5625, 930.5245, 982.6070, 986.6133, 1006.6445, 1015.6326, 1027.6664, 1042.6300, 1078.6445, 1107.8344, 1142.6742, 1153.6546, 1165.6966, 1179.7073, 1186.7303, 1197.6582, 1214.7097, 1219.6443, 1233.7159, 1265.7392, 1269.7243, 1326.7883, 1380.8667, 1428.9212, 1450.8531, 1475.8727, 1477.8489, 1484.8980, 1530.8700, 1557.9283, 1575.0154, 1598.9839, 1631.9464, 1654.9735, 1658.9825, 1708.0185, 1712.9684, 1724.0543, 1729.0035, 1733.0874, 1756.0868, 1781.0936, 1797.1145, 1804.0575, 1813.1035, 1839.0932, 1850.0717, 1882.1314, 1900.1334, 1915.1486, 1931.1352, 1938.1476, 1947.1417, 1949.1320, 1952.1522, 1966.1980, 1981.1803, 1994.1847, 2005.2465, 2021.1854, 2042.2539, 2044.2373, 2064.3065, 2117.3601, 2181.2406, 2215.2391, 2271.3649, 2284.3753, 2384.2549, 2438.4857, 2450.5041, 2498.5023, 2615.5335, 2645.5873, 2681.5950, 2705.4362, 2717.3922, 2729.6061, 2745.6012, 2808.6023, 2856.6076, 2872.6380, 3048.6449, 3284.6878

13. [LEU1\\_BUCUN](#) **Mass:** 56434 **Score:** 72 **Expect:** 0.022 **Matches:** 6  
 2-isopropylmalate synthase (Fragment) OS=Buchnera aphidicola subsp. Uroleucon sonchi OX=118118 GN=leuA PE=3 SV=1

| Observed  | Mr (expt) | Mr (calc) | ppm    | Start | End | Miss | Ions | Peptide                               |
|-----------|-----------|-----------|--------|-------|-----|------|------|---------------------------------------|
| 790.5086  | 789.5013  | 789.4345  | 84.7   | 256   | -   | 262  | 0    | R.TSQVISR.I                           |
| 930.5245  | 929.5172  | 929.5658  | -52.29 | 311   | -   | 318  | 1    | K.VKLNLSR.S                           |
| 1475.8727 | 1474.8655 | 1474.7701 | 64.7   | 223   | -   | 236  | 0    | R.AGNTALEEVIMAIK.V + Oxidation (M)    |
| 1724.0543 | 1723.0470 | 1722.8498 | 114    | 296   | -   | 310  | 1    | R.ENYEIMDPSSIGLKK.V                   |
| 1882.1314 | 1881.1241 | 1880.8938 | 122    | 294   | -   | 309  | 1    | K.NRENYEIMDPSSIGLKK.K + Oxidation (M) |
| 1966.1980 | 1965.1907 | 1964.9554 | 120    | 25    | -   | 43   | 0    | 19 K.AGVDIMVEVFPPISSPGDFK.S           |

**No match to:** 804.3324, 808.4445, 817.4935, 832.4057, 837.5595, 842.5625, 857.5055, 964.5936, 982.6070, 986.6133, 1006.6445, 1015.6326, 1027.6664, 1042.6300, 1078.6445, 1107.8344, 1142.6742, 1153.6546, 1165.6966, 1179.7073, 1186.7303, 1197.6582, 1214.7097, 1219.6443, 1233.7159, 1240.6944, 1265.7392, 1269.7243, 1326.7883, 1368.8298, 1380.8667, 1428.9212, 1450.8531, 1477.8489, 1484.8980, 1530.8700, 1557.9283, 1575.0154, 1598.9839, 1617.9280, 1631.9464, 1654.9735, 1658.9825, 1708.0185, 1712.9684, 1729.0035, 1733.0874, 1756.0868, 1781.0936, 1797.1145, 1804.0575, 1813.1035, 1824.0974, 1839.0932, 1850.0717, 1900.1334, 1915.1486, 1931.1352, 1938.1476, 1947.1417, 1949.1320, 1952.1522, 1981.1803, 1994.1847, 2005.2465, 2021.1854, 2042.2539, 2044.2373, 2064.3065, 2117.3601, 2149.2508, 2181.2406, 2211.3162, 2215.2391, 2229.3298, 2271.3649, 2284.3753, 2384.2549, 2399.3191, 2438.4857, 2450.5041, 2498.5023, 2615.5335, 2645.5873, 2681.5950, 2705.4362, 2717.3922, 2729.6061, 2745.6012, 2808.6023, 2856.6076, 3048.6449, 3284.6878

14. [SECA\\_PROM4](#) **Mass:** 107505 **Score:** 71 **Expect:** 0.025 **Matches:** 12  
 Protein translocase subunit SecA OS=Prochlorococcus marinus (strain MIT 9211) OX=93059 GN=seca PE=3 SV=1

| Observed  | Mr (expt) | Mr (calc) | ppm   | Start | End | Miss | Ions | Peptide                                             |
|-----------|-----------|-----------|-------|-------|-----|------|------|-----------------------------------------------------|
| 808.4445  | 807.4373  | 807.4239  | 16.6  | 41    | -   | 47   | 1    | R.AKTADFR.E                                         |
| 857.5055  | 856.4982  | 856.5018  | -4.18 | 589   | -   | 595  | 0    | K.VLIDLER.K                                         |
| 1428.9212 | 1427.9139 | 1427.7197 | 136   | 299   | -   | 310  | 0    | K.DFWAHYITNALK.A                                    |
| 1598.9839 | 1597.9766 | 1597.8689 | 67.4  | 128   | -   | 141  | 1    | R.GVHVVTVNDYLARR.D                                  |
| 1631.9464 | 1630.9392 | 1630.8712 | 41.7  | 242   | -   | 257  | 1    | 17 K.AAEVVASLIRAEMGK.D + Oxidation (M)              |
| 1824.0974 | 1823.0901 | 1822.9247 | 90.7  | 507   | -   | 523  | 1    | --- R.GTDIILGGNSDYMARLK.L                           |
| 1947.1417 | 1946.1345 | 1945.9680 | 85.5  | 325   | -   | 342  | 1    | --- R.NGEAVIVDEFTRGVMPGR.R                          |
| 1966.1980 | 1965.1907 | 1965.1272 | 32.3  | 532   | -   | 548  | 1    | 31 K.LVKPEDGHKPPVPLQRR.S                            |
| 2042.2539 | 2041.2467 | 2041.1208 | 61.7  | 59    | -   | 75   | 1    | --- K.QRELLDEILPEVFSVVR.E                           |
| 2149.2508 | 2148.2435 | 2147.9544 | 135   | 928   | -   | 945  | 1    | --- R.NVIYSMFMFPQAPESDKR.- + Oxidation (M)          |
| 2384.2549 | 2383.2476 | 2383.1664 | 34.1  | 86    | -   | 106  | 0    | --- R.HFDVQLIGGMVLHGGQIAEMK.T + 2 Oxidation (M)     |
| 2856.6076 | 2855.6003 | 2855.3946 | 72.0  | 86    | -   | 111  | 1    | --- R.HFDVQLIGGMVLHGGQIAEMKTEGK.T + 2 Oxidation (M) |

**No match to:** 790.5086, 804.3324, 817.4935, 832.4057, 837.5595, 842.5625, 930.5245, 964.5936, 982.6070, 986.6133, 1006.6445, 1015.6326, 1027.6664, 1042.6300, 1078.6445, 1107.8344, 1142.6742, 1153.6546, 1165.6966, 1179.7073, 1186.7303, 1197.6582, 1214.7097, 1219.6443, 1233.7159, 1240.6944, 1265.7392, 1269.7243, 1326.7883, 1368.8298, 1380.8667, 1428.9212, 1450.8531, 1475.8727, 1477.8489, 1484.8980, 1530.8700, 1557.9283, 1575.0154, 1617.9280, 1654.9735, 1658.9825, 1708.0185, 1712.9684, 1724.0543, 1729.0035, 1733.0874, 1756.0868, 1781.0936, 1797.1145, 1804.0575, 1813.1035, 1839.0932, 1850.0717, 1882.1314, 1900.1334, 1915.1486, 1931.1352, 1938.1476, 1949.1320, 1952.1522, 1981.1803, 1994.1847, 2005.2465, 2021.1854, 2042.2539, 2064.3065, 2117.3601, 2181.2406, 2211.3162, 2215.2391, 2229.3298, 2271.3649, 2284.3753, 2399.3191, 2438.4857, 2450.5041, 2498.5023, 2615.5335, 2645.5873, 2681.5950, 2705.4362, 2717.3922, 2729.6061, 2745.6012, 2808.6023, 2856.6076, 3048.6449, 3284.6878

15. [RPOA\\_PROM1](#) **Mass:** 34244 **Score:** 71 **Expect:** 0.026 **Matches:** 5  
 DNA-directed RNA polymerase subunit alpha OS=Prochlorococcus marinus (strain NATL1A) OX=167555 GN=rpoA PE=3 SV=1

| Observed  | Mr (expt) | Mr (calc) | ppm     | Start | End | Miss | Ions | Peptide                                  |
|-----------|-----------|-----------|---------|-------|-----|------|------|------------------------------------------|
| 804.3324  | 803.3251  | 803.4137  | -110.29 | 84    | -   | 90   | 0    | --- K.QISVDSR.S                          |
| 1197.6582 | 1196.6509 | 1196.7129 | -51.78  | 99    | -   | 110  | 1    | --- R.LVVTGPADVKAK.D                     |
| 1475.8727 | 1474.8655 | 1474.7814 | 57.0    | 43    | -   | 57   | 0    | 28 R.VLMGGLEGSVAVTAVR.I + Oxidation (M)  |
| 1631.9464 | 1630.9392 | 1630.8825 | 34.8    | 42    | -   | 57   | 1    | 27 R.RVLMGGLEGSVAVTAVR.I + Oxidation (M) |
| 2117.3601 | 2116.3529 | 2116.0834 | 127     | 73    | -   | 90   | 1    | --- R.EDVLDILLNCKQISVDSR.S               |

**No match to:** 790.5086, 808.4445, 817.4935, 832.4057, 837.5595, 842.5625, 857.5055, 930.5245, 964.5936, 982.6070, 986.6133, 1006.6445, 1015.6326, 1027.6664, 1042.6300, 1078.6445, 1107.8344, 1142.6742, 1153.6546, 1165.6966, 1179.7073, 1186.7303, 1197.6582, 1214.7097, 1219.6443, 1233.7159, 1240.6944, 1265.7392, 1269.7243, 1326.7883, 1368.8298, 1380.8667, 1428.9212, 1450.8531, 1475.8727, 1477.8489, 1484.8980, 1530.8700, 1557.9283, 1575.0154, 1598.9839, 1617.9280, 1654.9735, 1658.9825, 1708.0185, 1712.9684, 1724.0543, 1729.0035, 1733.0874, 1756.0868, 1781.0936, 1797.1145, 1804.0575, 1813.1035, 1824.0974, 1839.0932, 1850.0717, 1882.1314, 1900.1334, 1915.1486, 1931.1352, 1938.1476, 1947.1417, 1949.1320, 1952.1522, 1966.1980, 1981.1803, 1994.1847, 2005.2465, 2021.1854, 2042.2539, 2044.2373, 2064.3065, 2149.2508, 2181.2406, 2211.3162, 2215.2391, 2229.3298, 2271.3649, 2284.3753, 2384.2549, 2399.3191, 2438.4857, 2450.5041, 2498.5023, 2615.5335, 2645.5873, 2681.5950, 2705.4362, 2717.3922, 2729.6061, 2745.6012, 2808.6023, 2856.6076, 2872.6380, 3048.6449, 3284.6878

16. [RPOA\\_PROMT](#) **Mass:** 34244 **Score:** 71 **Expect:** 0.026 **Matches:** 5  
 DNA-directed RNA polymerase subunit alpha OS=Prochlorococcus marinus (strain NATL2A) OX=59920 GN=rpoA PE=3 SV=1

| Observed  | Mr (expt) | Mr (calc) | ppm     | Start | End | Miss | Ions | Peptide                                  |
|-----------|-----------|-----------|---------|-------|-----|------|------|------------------------------------------|
| 804.3324  | 803.3251  | 803.4137  | -110.29 | 84    | -   | 90   | 0    | --- K.QISVDSR.S                          |
| 1197.6582 | 1196.6509 | 1196.7129 | -51.78  | 99    | -   | 110  | 1    | --- R.LVVTGPADVKAK.D                     |
| 1475.8727 | 1474.8655 | 1474.7814 | 57.0    | 43    | -   | 57   | 0    | 28 R.VLMGGLEGSVAVTAVR.I + Oxidation (M)  |
| 1631.9464 | 1630.9392 | 1630.8825 | 34.8    | 42    | -   | 57   | 1    | 27 R.RVLMGGLEGSVAVTAVR.I + Oxidation (M) |
| 2117.3601 | 2116.3529 | 2116.0834 | 127     | 73    | -   | 90   | 1    | --- R.EDVLDILLNCKQISVDSR.S               |

**No match to:** 790.5086, 808.4445, 817.4935, 832.4057, 837.5595, 842.5625, 857.5055, 930.5245, 964.5936, 982.6070, 986.6133, 1006.6445, 1015.6326, 1027.6664, 1042.6300, 1078.6445, 1107.8344, 1142.6742, 1153.6546, 1165.6966, 1179.7073, 1186.7303, 1197.6582, 1214.7097, 1219.6443, 1233.7159, 1240.6944, 1265.7392, 1269.7243, 1326.7883, 1368.8298, 1380.8667, 1428.9212, 1450.8531, 1475.8727, 1477.8489, 1484.8980, 1530.8700, 1557.9283, 1575.0154, 1598.9839, 1617.9280, 1654.9735, 1658.9825, 1708.0185, 1712.9684, 1724.0543, 1729.0035, 1733.0874, 1756.0868, 1781.0936, 1797.1145, 1804.0575, 1813.1035, 1824.0974, 1839.0932, 1850.0717, 1882.1314, 1900.1334, 1915.1486, 1931.1352, 1938.1476, 1947.1417, 1949.1320, 1952.1522, 1966.1980, 1981.1803, 1994.1847, 2005.2465, 2021.1854, 2042.2539, 2044.2373, 2064.3065, 2149.2508, 2181.2406, 2211.3162, 2215.2391, 2229.3298, 2271.3649, 2284.3753, 2384.2549, 2399.3191, 2438.4857, 2450.5041, 2498.5023, 2615.5335, 2645.5873, 2681.5950, 2705.4362, 2717.3922, 2729.6061, 2745.6012, 2808.6023, 2856.6076, 2872.6380, 3048.6449, 3284.6878

17. [PROA\\_BRUSU](#) **Mass:** 44300 **Score:** 69 **Expect:** 0.039 **Matches:** 9  
 Gamma-glutamyl phosphate reductase OS=Brucella suis biovar 1 (strain 1330) OX=204722 GN=proA PE=3 SV=1

| Observed  | Mr (expt) | Mr (calc) | ppm  | Start | End | Miss | Ions | Peptide                   |
|-----------|-----------|-----------|------|-------|-----|------|------|---------------------------|
| 1015.6326 | 1014.6253 | 1014.5345 | 89.5 | 80    | -   | 88   | 0    | --- R.IDAIEDIR.A          |
| 1475.8727 | 1474.8655 | 1474.7450 | 81.7 | 258   | -   | 271  | 0    | 21 R.TGICGAAETLLVDR.A     |
| 1631.9464 | 1630.9392 | 1630.8461 | 57.1 | 257   | -   | 271  | 1    | --- R.RTGICGAAETLLVDR.A   |
| 1756.0868 | 1755.0795 | 1754.9162 | 93.0 | 47    | -   | 62   | 1    | --- R.ADILEANRLDLANAENK.N |
| 1813.1035 | 1812.0963 | 1811.9741 | 67.4 | 73    | -   | 88   | 1    | --- R.LTLNEARIDIAIEDIR.A  |

1938.1476 1937.1403 1936.9312 108 55 - 72 1 --- R.LDLANAENKNGMAASFVDR.L + Oxidation (M)  
 1966.1980 1965.1907 1965.1081 42.0 189 - 208 1 12 R.AAVGEMLKGLGGAIIVIVPR.G  
 2181.2406 2180.2333 2180.1549 36.0 34 - 54 1 --- K.ALNAAADALEARADILEANR.L  
 2681.5950 2680.5877 2680.3795 77.7 217 - 239 1 --- R.VQSEARVPVFAHLEGICHLYIDK.S

**No match to:** 790.5086, 804.3324, 808.4445, 817.4935, 832.4057, 837.5595, 842.5625, 857.5055, 930.5245, 964.5936, 982.6070, 986.6133, 1006.6445, 1027.6664, 1042.6300, 1078.6445, 1107.8344, 1142.6742, 1153.6546, 1165.6966, 1179.7073, 1186.7303, 1197.6582, 1214.7097, 1219.6443, 1233.7159, 1240.6944, 1265.7392, 1269.7243, 1326.7883, 1368.8298, 1380.8667, 1428.9212, 1450.8531, 1477.8489, 1484.8980, 1530.8700, 1557.9283, 1575.0154, 1598.9839, 1617.9280, 1654.9735, 1658.9825, 1708.0185, 1712.9684, 1724.0543, 1729.0035, 1733.0874, 1781.0936, 1797.1145, 1804.0575, 1824.0974, 1839.0932, 1850.0717, 1882.1314, 1900.1334, 1915.1486, 1931.1352, 1947.1417, 1949.1320, 1952.1522, 1981.1803, 1994.1847, 2005.2465, 2021.1854, 2042.2539, 2044.2373, 2064.3065, 2117.3601, 2149.2508, 2211.3162, 2215.2391, 2229.3298, 2271.3649, 2284.3753, 2384.2549, 2399.3191, 2438.4857, 2450.5041, 2498.5023, 2615.5335, 2645.5873, 2705.4362, 2717.3922, 2729.6061, 2745.6012, 2808.6023, 2856.6076, 2872.6380, 3048.6449, 3284.6878

18. [EFTU HERAU](#) Mass: 43768 Score: 69 Expect: 0.04 Matches: 3

Elongation factor Tu OS=Herpetosiphon aurantiacus OX=65 GN=tuf PE=3 SV=1

| Observed  | Mr(expt)  | Mr(calc)  | ppm     | Start | End | Miss | Ions  | Peptide               |
|-----------|-----------|-----------|---------|-------|-----|------|-------|-----------------------|
| 804.3324  | 803.3251  | 803.4436  | -147.44 | 35    | -   | 41   | 1 --- | K.TMALRGR.A           |
| 1631.9464 | 1630.9392 | 1630.7699 | 104     | 46    | -   | 59   | 1 63  | R.AFDQIDNAPEERAR.G    |
| 1947.1417 | 1946.1345 | 1946.0513 | 42.7    | 156   | -   | 172  | 1 --- | R.ELLTKYGFPGDEIPIVR.G |

**No match to:** 790.5086, 808.4445, 817.4935, 832.4057, 837.5595, 842.5625, 857.5055, 930.5245, 964.5936, 982.6070, 986.6133, 1006.6445, 1015.6326, 1027.6664, 1042.6300, 1078.6445, 1107.8344, 1142.6742, 1153.6546, 1165.6966, 1179.7073, 1186.7303, 1197.6582, 1214.7097, 1219.6443, 1233.7159, 1240.6944, 1265.7392, 1269.7243, 1326.7883, 1368.8298, 1380.8667, 1428.9212, 1450.8531, 1475.8727, 1477.8489, 1484.8980, 1530.8700, 1557.9283, 1575.0154, 1598.9839, 1617.9280, 1654.9735, 1658.9825, 1708.0185, 1712.9684, 1724.0543, 1729.0035, 1733.0874, 1756.0868, 1781.0936, 1797.1145, 1804.0575, 1813.1035, 1824.0974, 1839.0932, 1850.0717, 1882.1314, 1900.1334, 1915.1486, 1931.1352, 1938.1476, 1949.1320, 1952.1522, 1966.1980, 1981.1803, 1994.1847, 2005.2465, 2021.1854, 2042.2539, 2044.2373, 2064.3065, 2117.3601, 2149.2508, 2181.2406, 2211.3162, 2215.2391, 2229.3298, 2271.3649, 2284.3753, 2384.2549, 2399.3191, 2438.4857, 2450.5041, 2498.5023, 2615.5335, 2645.5873, 2681.5950, 2705.4362, 2717.3922, 2729.6061, 2745.6012, 2808.6023, 2856.6076, 2872.6380, 3048.6449, 3284.6878

19. [EFTU1 HALHL](#) Mass: 43283 Score: 69 Expect: 0.04 Matches: 3

Elongation factor Tu 1 OS=Halorhodospira halophila (strain DSM 244 / SL1) OX=349124 GN=tuf1 PE=3 SV=1

| Observed  | Mr(expt)  | Mr(calc)  | ppm  | Start | End | Miss | Ions  | Peptide              |
|-----------|-----------|-----------|------|-------|-----|------|-------|----------------------|
| 817.4935  | 816.4862  | 816.4705  | 19.2 | 385   | -   | 393  | 0 --- | R.TVGGVVS.K.I        |
| 1631.9464 | 1630.9392 | 1630.7699 | 104  | 46    | -   | 59   | 1 63  | R.AFDQIDNAPEERAR.G   |
| 1654.9735 | 1653.9662 | 1653.8686 | 59.0 | 267   | -   | 282  | 0 --- | K.LLDQGEAGDNIGALLR.G |

**No match to:** 790.5086, 804.3324, 808.4445, 832.4057, 837.5595, 842.5625, 857.5055, 930.5245, 964.5936, 982.6070, 986.6133, 1006.6445, 1015.6326, 1027.6664, 1042.6300, 1078.6445, 1107.8344, 1142.6742, 1153.6546, 1165.6966, 1179.7073, 1186.7303, 1197.6582, 1214.7097, 1219.6443, 1233.7159, 1240.6944, 1265.7392, 1269.7243, 1326.7883, 1368.8298, 1380.8667, 1428.9212, 1450.8531, 1475.8727, 1477.8489, 1484.8980, 1530.8700, 1557.9283, 1575.0154, 1598.9839, 1617.9280, 1658.9825, 1708.0185, 1712.9684, 1724.0543, 1729.0035, 1733.0874, 1756.0868, 1781.0936, 1797.1145, 1804.0575, 1813.1035, 1824.0974, 1839.0932, 1850.0717, 1882.1314, 1900.1334, 1915.1486, 1931.1352, 1938.1476, 1947.1417, 1949.1320, 1952.1522, 1966.1980, 1981.1803, 1994.1847, 2005.2465, 2021.1854, 2042.2539, 2044.2373, 2064.3065, 2117.3601, 2149.2508, 2181.2406, 2211.3162, 2215.2391, 2229.3298, 2271.3649, 2284.3753, 2384.2549, 2399.3191, 2438.4857, 2450.5041, 2498.5023, 2615.5335, 2645.5873, 2681.5950, 2705.4362, 2717.3922, 2729.6061, 2745.6012, 2808.6023, 2856.6076, 2872.6380, 3048.6449, 3284.6878

20. [EFTU2 HALHL](#) Mass: 43269 Score: 69 Expect: 0.04 Matches: 3

Elongation factor Tu 2 OS=Halorhodospira halophila (strain DSM 244 / SL1) OX=349124 GN=tuf2 PE=3 SV=1

| Observed  | Mr(expt)  | Mr(calc)  | ppm  | Start | End | Miss | Ions  | Peptide              |
|-----------|-----------|-----------|------|-------|-----|------|-------|----------------------|
| 817.4935  | 816.4862  | 816.4705  | 19.2 | 385   | -   | 393  | 0 --- | R.TVGGVVS.K.I        |
| 1631.9464 | 1630.9392 | 1630.7699 | 104  | 46    | -   | 59   | 1 63  | R.AFDQIDNAPEERAR.G   |
| 1654.9735 | 1653.9662 | 1653.8686 | 59.0 | 267   | -   | 282  | 0 --- | K.LLDQGEAGDNIGALLR.G |

**No match to:** 790.5086, 804.3324, 808.4445, 832.4057, 837.5595, 842.5625, 857.5055, 930.5245, 964.5936, 982.6070, 986.6133, 1006.6445, 1015.6326, 1027.6664, 1042.6300, 1078.6445, 1107.8344, 1142.6742, 1153.6546, 1165.6966, 1179.7073, 1186.7303, 1197.6582, 1214.7097, 1219.6443, 1233.7159, 1240.6944, 1265.7392, 1269.7243, 1326.7883, 1368.8298, 1380.8667, 1428.9212, 1450.8531, 1475.8727, 1477.8489, 1484.8980, 1530.8700, 1557.9283, 1575.0154, 1598.9839, 1617.9280, 1658.9825, 1708.0185, 1712.9684, 1724.0543, 1729.0035, 1733.0874, 1756.0868, 1781.0936, 1797.1145, 1804.0575, 1813.1035, 1824.0974, 1839.0932, 1850.0717, 1882.1314, 1900.1334, 1915.1486, 1931.1352, 1938.1476, 1947.1417, 1949.1320, 1952.1522, 1966.1980, 1981.1803, 1994.1847, 2005.2465, 2021.1854, 2042.2539, 2044.2373, 2064.3065, 2117.3601, 2149.2508, 2181.2406, 2211.3162, 2215.2391, 2229.3298, 2271.3649, 2284.3753, 2384.2549, 2399.3191, 2438.4857, 2450.5041, 2498.5023, 2615.5335, 2645.5873, 2681.5950, 2705.4362, 2717.3922, 2729.6061, 2745.6012, 2808.6023, 2856.6076, 2872.6380, 3048.6449, 3284.6878

## Search Parameters

Type of search : MS/MS Ion Search  
 Enzyme : Trypsin  
 Fixed modifications : [Carbamidomethyl \(C\)](#)  
 Variable modifications : [Oxidation \(M\)](#)  
 Mass values : Monoisotopic  
 Protein Mass : Unrestricted  
 Peptide Mass Tolerance : ± 150 ppm  
 Fragment Mass Tolerance : ± 2 Da  
 Max Missed Cleavages : 1  
 Instrument type : MALDI-TOF-TOF  
 Query1 (790.5086,1+) : <no title>  
 Query2 (804.3324,1+) : <no title>  
 Query3 (808.4445,1+) : <no title>  
 Query4 (817.4935,1+) : <no title>  
 Query5 (832.4057,1+) : <no title>  
 Query6 (837.5595,1+) : <no title>  
 Query7 (842.5625,1+) : <no title>  
 Query8 (857.5055,1+) : <no title>  
 Query9 (930.5245,1+) : <no title>  
 Query10 (964.5936,1+) : <no title>  
 Query11 (982.6070,1+) : <no title>  
 Query12 (986.6133,1+) : <no title>  
 Query13 (1006.6445,1+) : <no title>  
 Query14 (1015.6326,1+) : <no title>  
 Query15 (1027.6664,1+) : <no title>  
 Query16 (1042.6300,1+) : <no title>  
 Query17 (1078.6445,1+) : <no title>  
 Query18 (1107.8344,1+) : <no title>  
 Query19 (1142.6742,1+) : <no title>  
 Query20 (1153.6546,1+) : <no title>  
 Query21 (1165.6966,1+) : <no title>  
 Query22 (1179.7073,1+) : <no title>  
 Query23 (1186.7303,1+) : <no title>  
 Query24 (1197.6582,1+) : <no title>  
 Query25 (1214.7097,1+) : <no title>  
 Query26 (1219.6443,1+) : <no title>

Query27 (1233.7159,1+) : <no title>  
Query28 (1240.6944,1+) : <no title>  
Query29 (1265.7392,1+) : <no title>  
Query30 (1269.7243,1+) : <no title>  
Query31 (1326.7883,1+) : <no title>  
Query32 (1368.8298,1+) : <no title>  
Query33 (1380.8667,1+) : <no title>  
Query34 (1428.9212,1+) : <no title>  
Query35 (1450.8531,1+) : <no title>  
Query36 (1475.8727,1+) : <no title>  
Query37 (1477.8489,1+) : <no title>  
Query38 (1484.8980,1+) : <no title>  
Query39 (1530.8700,1+) : <no title>  
Query40 (1557.9283,1+) : <no title>  
Query41 (1575.0154,1+) : <no title>  
Query42 (1598.9839,1+) : <no title>  
Query43 (1617.9280,1+) : <no title>  
Query44 (1631.9464,1+) : <no title>  
Query45 (1654.9735,1+) : <no title>  
Query46 (1658.9825,1+) : <no title>  
Query47 (1708.0185,1+) : <no title>  
Query48 (1712.9684,1+) : <no title>  
Query49 (1724.0543,1+) : <no title>  
Query50 (1729.0035,1+) : <no title>  
Query51 (1733.0874,1+) : <no title>  
Query52 (1756.0868,1+) : <no title>  
Query53 (1781.0936,1+) : <no title>  
Query54 (1797.1145,1+) : <no title>  
Query55 (1804.0575,1+) : <no title>  
Query56 (1813.1035,1+) : <no title>  
Query57 (1824.0974,1+) : <no title>  
Query58 (1839.0932,1+) : <no title>  
Query59 (1850.0717,1+) : <no title>  
Query60 (1882.1314,1+) : <no title>  
Query61 (1900.1334,1+) : <no title>  
Query62 (1915.1486,1+) : <no title>  
Query63 (1931.1352,1+) : <no title>  
Query64 (1938.1476,1+) : <no title>  
Query65 (1947.1417,1+) : <no title>  
Query66 (1949.1320,1+) : <no title>  
Query67 (1952.1522,1+) : <no title>  
Query68 (1966.1980,1+) : <no title>  
Query69 (1981.1803,1+) : <no title>  
Query70 (1994.1847,1+) : <no title>  
Query71 (2005.2465,1+) : <no title>  
Query72 (2021.1854,1+) : <no title>  
Query73 (2042.2539,1+) : <no title>  
Query74 (2044.2373,1+) : <no title>  
Query75 (2064.3065,1+) : <no title>  
Query76 (2117.3601,1+) : <no title>  
Query77 (2149.2508,1+) : <no title>  
Query78 (2181.2406,1+) : <no title>  
Query79 (2211.3162,1+) : <no title>  
Query80 (2215.2391,1+) : <no title>  
Query81 (2229.3298,1+) : <no title>  
Query82 (2271.3649,1+) : <no title>  
Query83 (2284.3753,1+) : <no title>  
Query84 (2384.2549,1+) : <no title>  
Query85 (2399.3191,1+) : <no title>  
Query86 (2438.4857,1+) : <no title>  
Query87 (2450.5041,1+) : <no title>  
Query88 (2498.5023,1+) : <no title>  
Query89 (2615.5335,1+) : <no title>  
Query90 (2645.5873,1+) : <no title>  
Query91 (2681.5950,1+) : <no title>  
Query92 (2705.4362,1+) : <no title>  
Query93 (2717.3922,1+) : <no title>  
Query94 (2729.6061,1+) : <no title>  
Query95 (2745.6012,1+) : <no title>  
Query96 (2808.6023,1+) : <no title>  
Query97 (2856.6076,1+) : <no title>  
Query98 (2872.6380,1+) : <no title>  
Query99 (3048.6449,1+) : <no title>  
Query100 (3284.6878,1+) : <no title>

Mascot: <http://www.matrixscience.com/>

*MALDI MS MS Data Sheet of Urine  
Isolate*

Comment 1

Comment 2

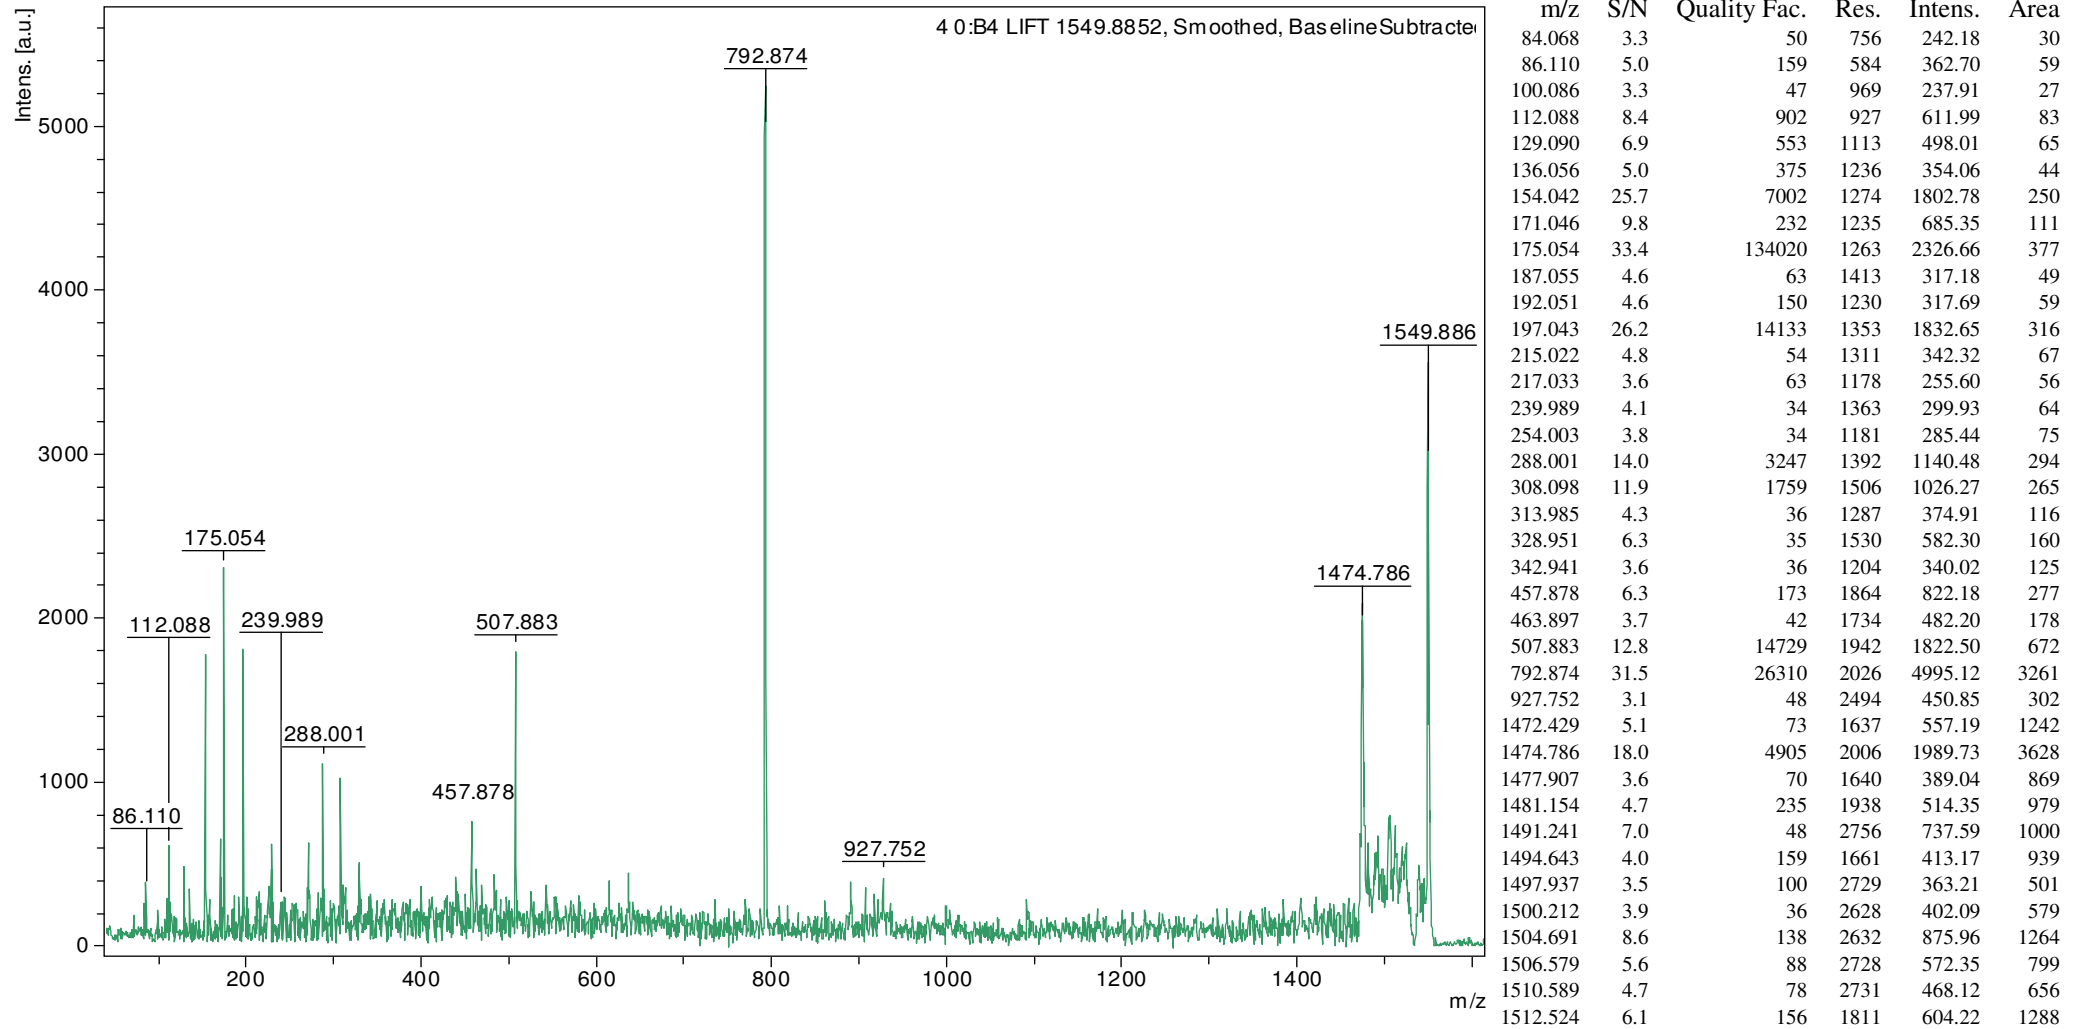

---

| m/z      | S/N  | Quality | Fac. | Res.    | Intens. | Area |
|----------|------|---------|------|---------|---------|------|
| 1517.668 | 4.9  | 115     | 1684 | 473.46  | 1089    |      |
| 1520.891 | 5.5  | 189     | 1689 | 527.18  | 1212    |      |
| 1524.039 | 5.9  | 275     | 1693 | 563.19  | 1294    |      |
| 1538.552 | 5.7  | 95      | 2245 | 538.33  | 950     |      |
| 1543.084 | 3.7  | 235     | 3365 | 346.10  | 410     |      |
| 1549.886 | 32.7 | 18955   | 3045 | 2986.80 | 3937    |      |

Comment 1

Comment 2

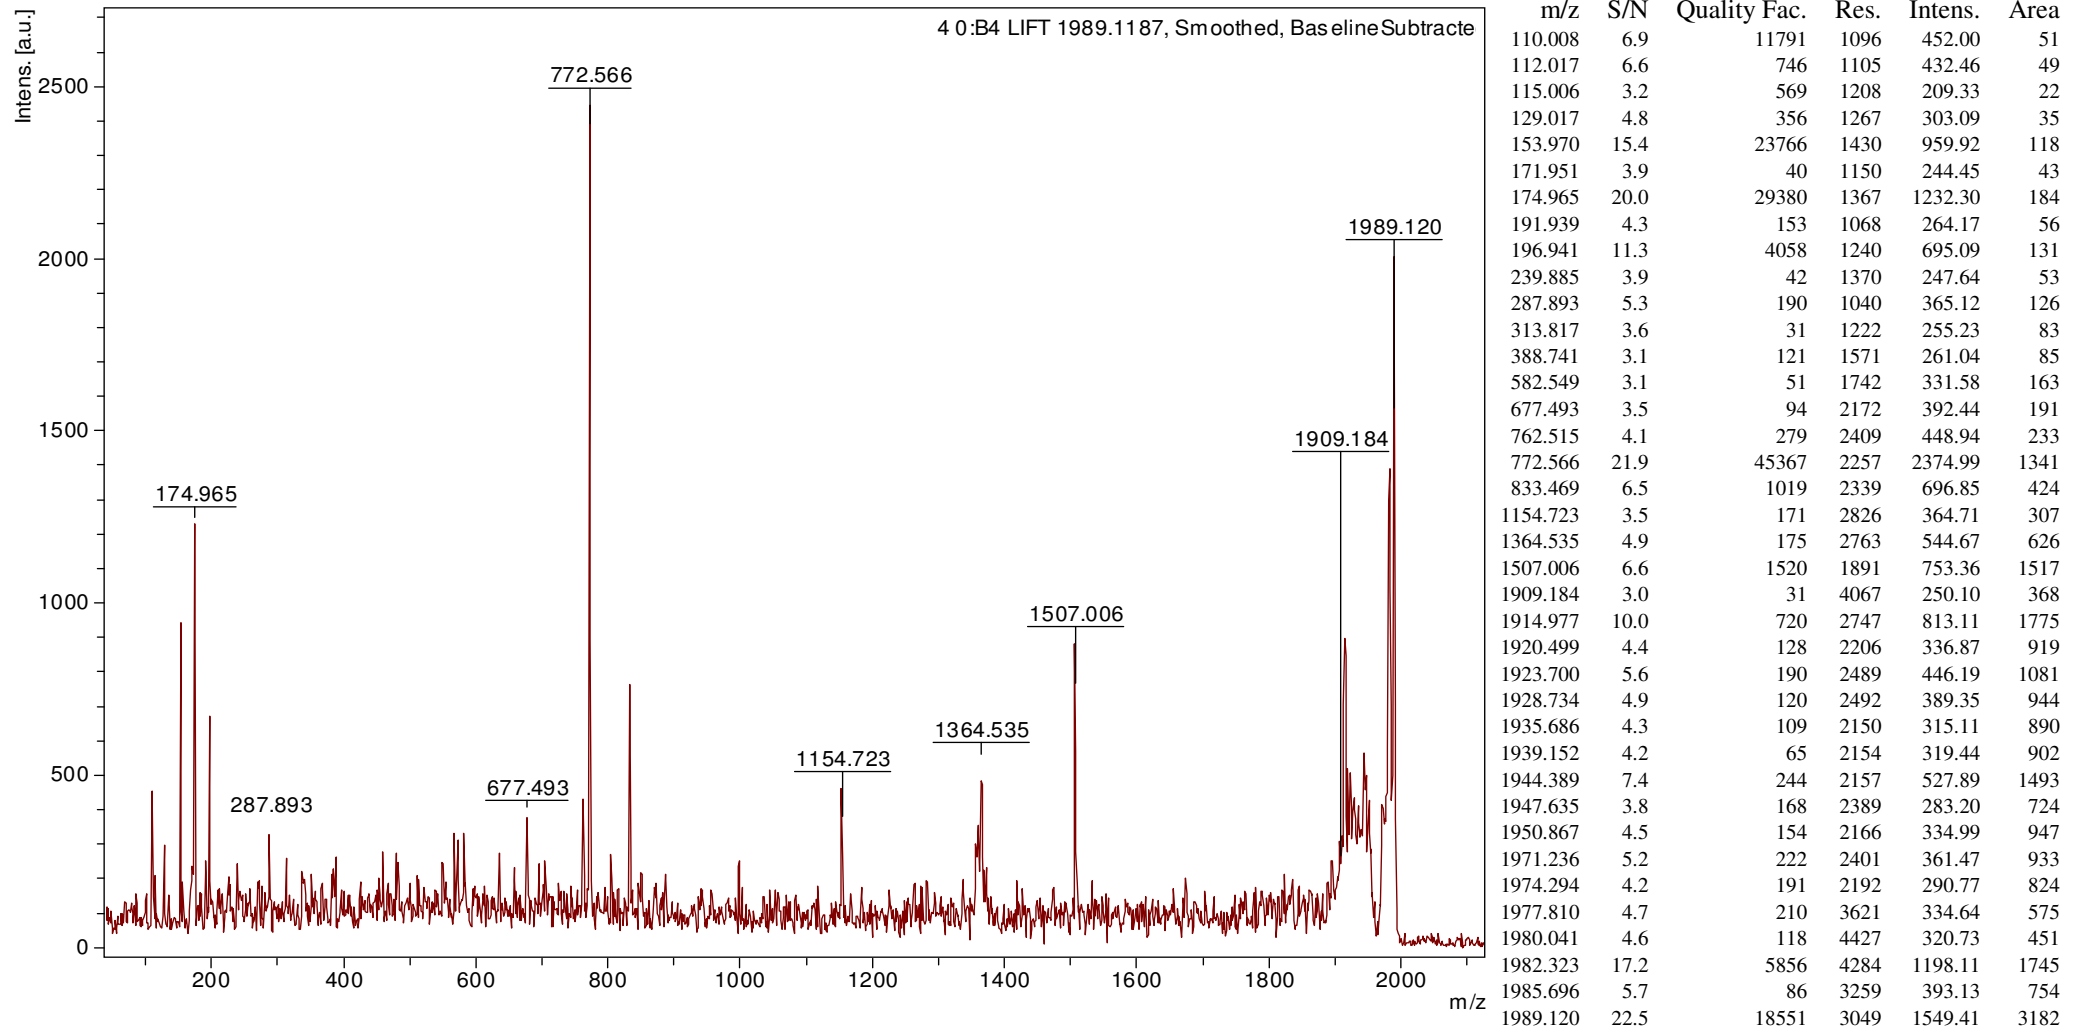



Comment 1

Comment 2

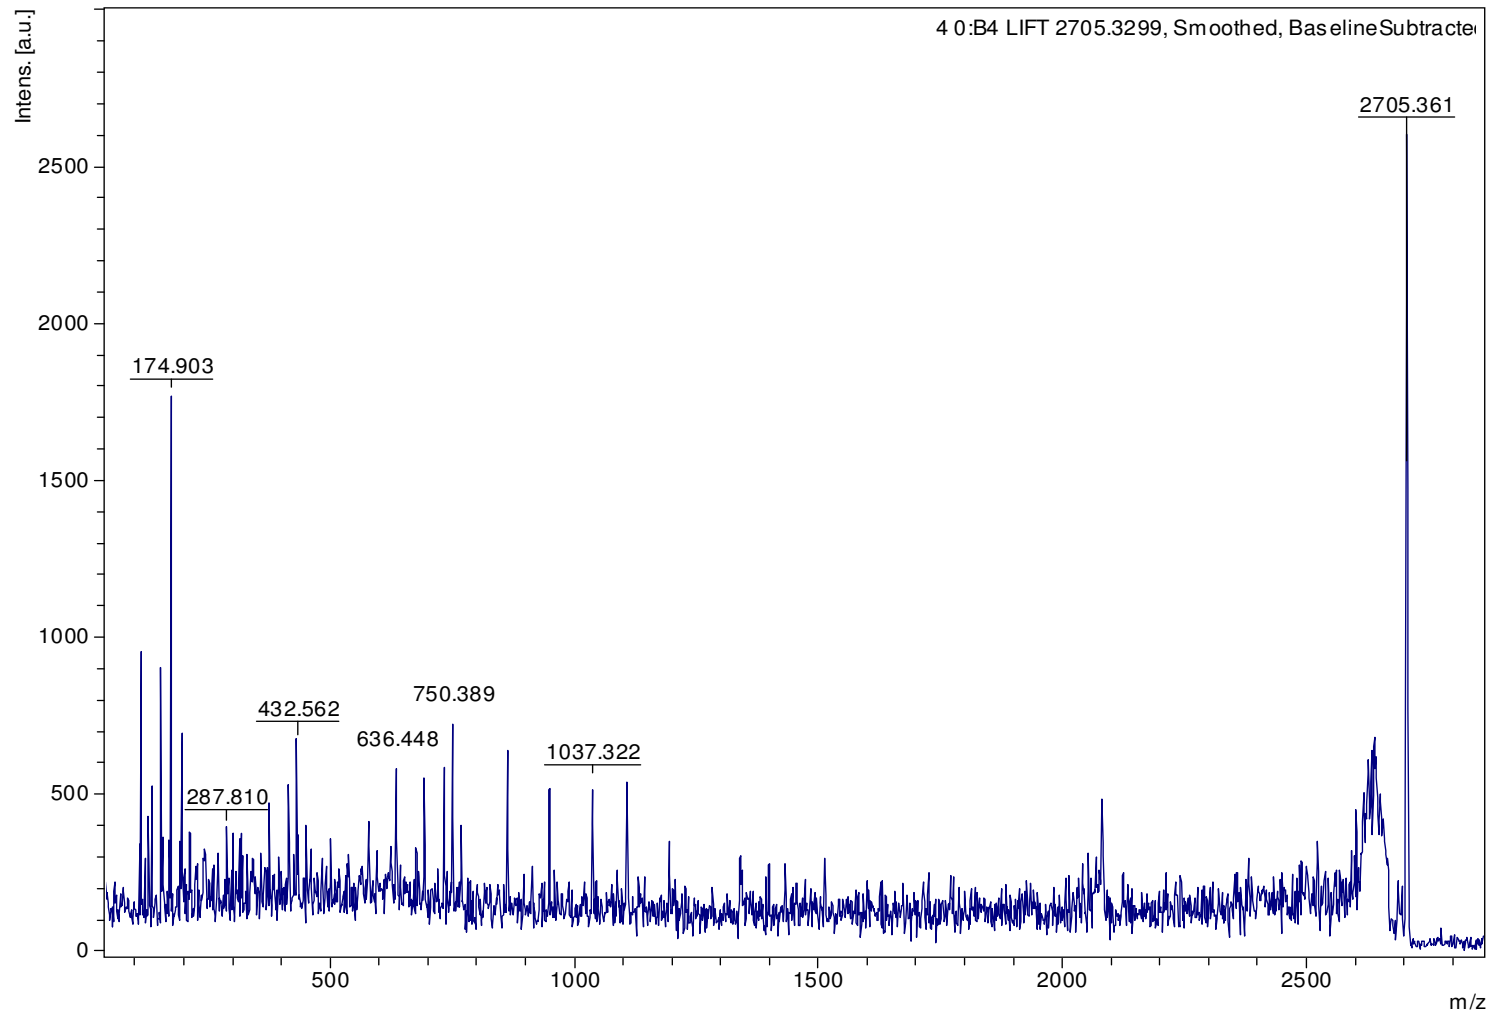

| m/z      | S/N  | Quality Fac. | Res. | Intens. | Area |
|----------|------|--------------|------|---------|------|
| 111.949  | 7.7  | 3570         | 701  | 879.65  | 158  |
| 128.947  | 3.5  | 300          | 686  | 395.68  | 84   |
| 135.910  | 4.6  | 1225         | 1452 | 518.75  | 55   |
| 153.901  | 7.9  | 7500         | 1378 | 884.01  | 113  |
| 157.907  | 3.5  | 47           | 1112 | 391.59  | 64   |
| 170.892  | 3.5  | 52           | 1386 | 386.79  | 56   |
| 174.903  | 16.2 | 22161        | 1567 | 1780.25 | 232  |
| 191.865  | 3.0  | 380          | 1306 | 332.14  | 58   |
| 196.880  | 6.4  | 1273         | 1517 | 696.09  | 107  |
| 213.864  | 3.8  | 109          | 1495 | 422.51  | 72   |
| 246.813  | 3.0  | 72           | 1460 | 337.90  | 70   |
| 271.797  | 3.1  | 41           | 1586 | 360.25  | 76   |
| 287.810  | 3.4  | 113          | 1152 | 401.88  | 125  |
| 301.711  | 3.2  | 95           | 2092 | 385.45  | 70   |
| 318.707  | 3.0  | 37           | 1465 | 377.66  | 104  |
| 375.642  | 3.2  | 94           | 1262 | 442.48  | 173  |
| 415.600  | 4.0  | 116          | 1447 | 578.26  | 223  |
| 432.562  | 4.6  | 134          | 1687 | 672.08  | 233  |
| 636.448  | 3.8  | 143          | 1605 | 612.30  | 370  |
| 693.370  | 3.6  | 175          | 2165 | 569.49  | 287  |
| 733.351  | 3.8  | 114          | 2028 | 594.00  | 346  |
| 750.389  | 5.0  | 777          | 1955 | 773.36  | 483  |
| 863.339  | 4.5  | 825          | 2222 | 665.55  | 449  |
| 950.391  | 3.7  | 368          | 2107 | 518.67  | 427  |
| 1037.322 | 4.0  | 266          | 2701 | 553.28  | 407  |
| 1108.270 | 3.2  | 84           | 2122 | 447.44  | 469  |
| 2624.440 | 5.5  | 178          | 3925 | 489.81  | 1138 |
| 2629.634 | 4.1  | 58           | 2923 | 356.91  | 1117 |
| 2634.529 | 3.6  | 63           | 2925 | 313.11  | 981  |
| 2638.928 | 5.2  | 103          | 2933 | 416.48  | 1305 |
| 2643.993 | 4.5  | 95           | 2936 | 365.00  | 1145 |
| 2649.931 | 3.9  | 66           | 2943 | 316.70  | 996  |
| 2705.361 | 19.7 | 14471        | 4251 | 1547.18 | 3477 |

Comment 1

Comment 2

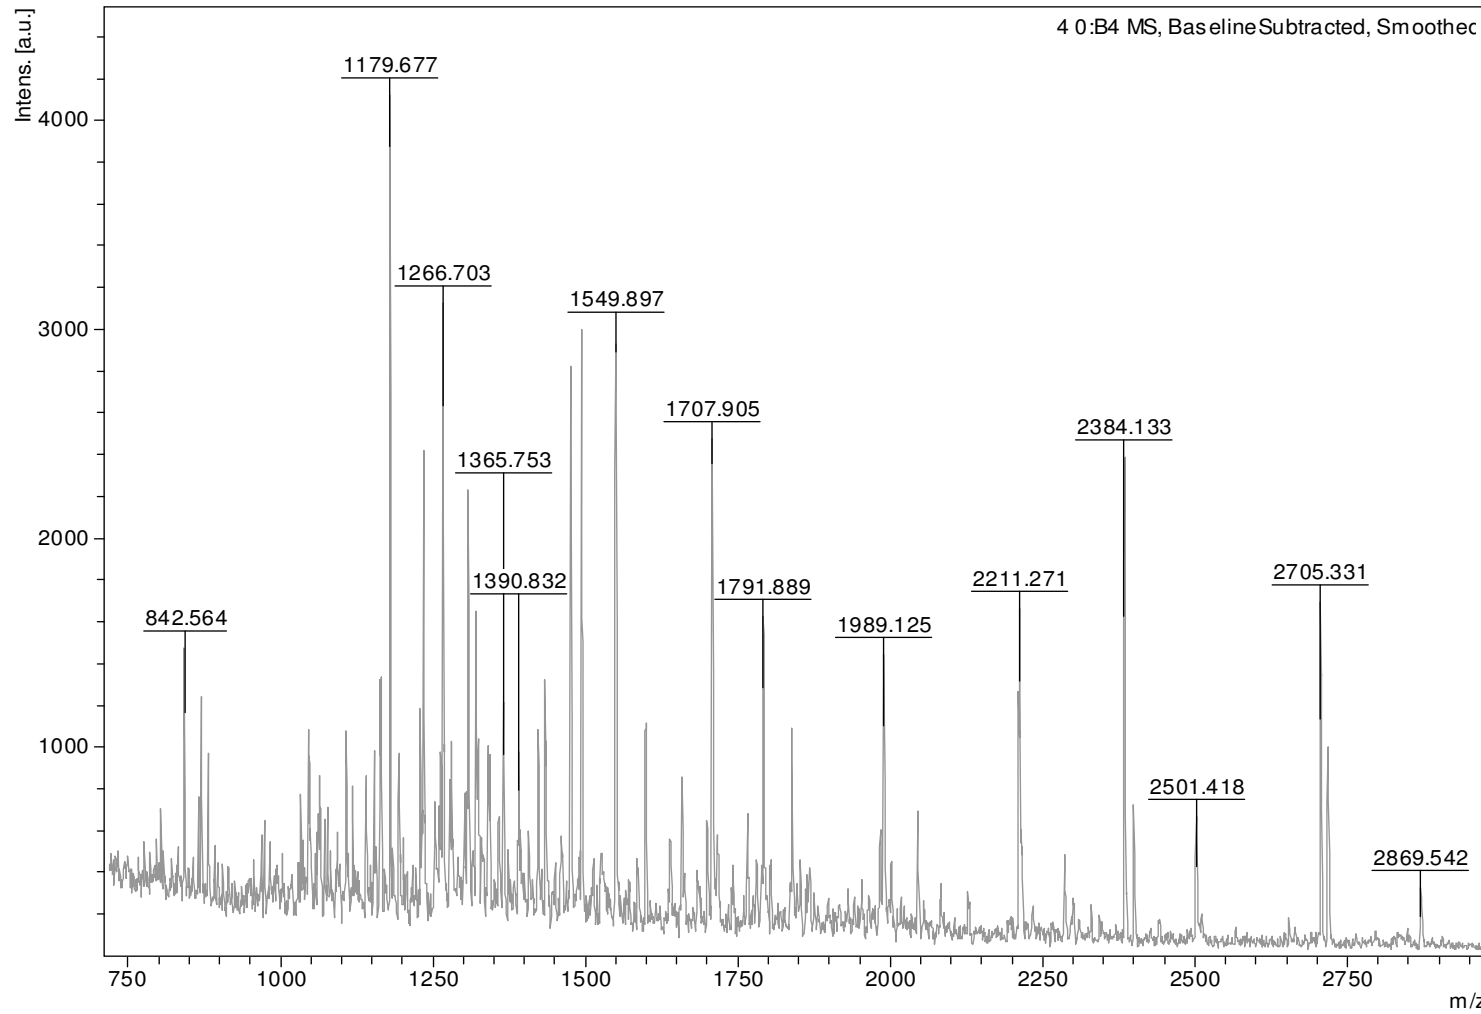

| m/z      | S/N  | Quality Fac. | Res. | Intens. | Area |
|----------|------|--------------|------|---------|------|
| 842.564  | 8.5  | 1479         | 4124 | 1141.12 | 406  |
| 870.594  | 6.3  | 810          | 3626 | 843.69  | 360  |
| 1107.621 | 7.0  | 368          | 4361 | 920.00  | 480  |
| 1153.695 | 6.6  | 435          | 7420 | 864.70  | 296  |
| 1162.697 | 6.4  | 79           | 5812 | 840.57  | 356  |
| 1164.675 | 7.2  | 202          | 5022 | 945.43  | 466  |
| 1179.677 | 29.4 | 13665        | 5948 | 3848.40 | 1651 |
| 1193.698 | 6.3  | 216          | 6222 | 828.88  | 347  |
| 1229.897 | 8.1  | 861          | 6044 | 1057.70 | 470  |
| 1234.747 | 19.4 | 1998         | 5959 | 2515.46 | 1162 |
| 1266.703 | 20.2 | 7660         | 5763 | 2607.41 | 1294 |
| 1280.752 | 6.7  | 596          | 5593 | 860.29  | 449  |
| 1308.753 | 11.9 | 2233         | 5063 | 1524.58 | 903  |
| 1320.680 | 8.4  | 366          | 4093 | 1070.68 | 798  |
| 1340.777 | 6.2  | 847          | 5061 | 785.04  | 486  |
| 1365.753 | 7.5  | 1696         | 5083 | 940.11  | 599  |
| 1390.832 | 6.2  | 571          | 4547 | 770.56  | 566  |
| 1422.803 | 7.2  | 1515         | 5520 | 886.07  | 563  |
| 1434.864 | 9.2  | 2839         | 6133 | 1119.94 | 654  |
| 1475.856 | 22.1 | 8771         | 6540 | 2640.49 | 1515 |
| 1493.845 | 22.8 | 12552        | 6061 | 2706.52 | 1720 |
| 1549.897 | 25.0 | 18485        | 6858 | 2870.36 | 1737 |
| 1598.938 | 9.2  | 6046         | 6343 | 1023.43 | 712  |
| 1657.932 | 6.1  | 633          | 4757 | 649.91  | 642  |
| 1707.905 | 22.7 | 25644        | 6707 | 2328.44 | 1744 |
| 1791.889 | 13.1 | 2963         | 5653 | 1260.03 | 1223 |
| 1839.063 | 8.8  | 5216         | 6673 | 816.14  | 712  |
| 1989.125 | 14.0 | 8035         | 6866 | 1079.87 | 1006 |
| 2045.190 | 6.4  | 1553         | 5619 | 454.15  | 531  |
| 2211.271 | 22.9 | 11216        | 9070 | 1293.53 | 1038 |
| 2384.133 | 35.3 | 15290        | 8029 | 1597.91 | 1625 |
| 2399.201 | 10.1 | 6130         | 8689 | 449.30  | 425  |
| 2501.418 | 10.3 | 1439         | 6624 | 403.84  | 528  |
| 2705.331 | 37.2 | 60552        | 9753 | 1110.08 | 1115 |
| 2717.253 | 19.7 | 3369         | 7836 | 580.75  | 734  |
| 2869.542 | 6.6  | 1077         | 6568 | 160.65  | 262  |

**MATRIX SCIENCE Mascot Search Results**

User : sanovar  
 Email : sanovar@sandor.co.in  
 Search title :  
 MS data file : DATA.TXT  
 Database : SwissProt 2018\_06 (557713 sequences; 200130199 residues)  
 Taxonomy : Bacteria (Eubacteria) (333552 sequences)  
 Timestamp : 11 Jul 2018 at 12:08:07 GMT  
 Warning : **A Peptide summary report will usually give a much clearer picture of MS/MS search results.**  
 Top Score : 75 for **TKT1\_ECOLI**, Transketolase 1 OS=Escherichia coli (strain K12) OX=83333 GN=tktA PE=1 SV=5

**Mascot Score Histogram**

Protein score is  $-10 \cdot \log(P)$ , where P is the probability that the observed match is a random event.  
 Protein scores greater than 68 are significant ( $p < 0.05$ ).  
 Protein scores are derived from ions scores as a non-probabilistic basis for ranking protein hits.

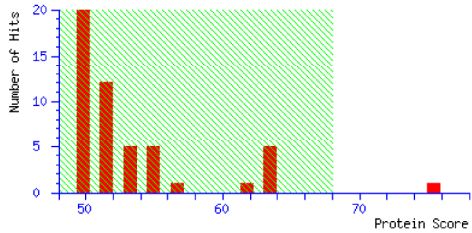

**Protein Summary Report**

Format As  [Help](#)  
 Significance threshold  $p <$   Max. number of hits   
 Preferred taxonomy

**Index**

| Accession                      | Mass   | Score | Description                                                                                              |
|--------------------------------|--------|-------|----------------------------------------------------------------------------------------------------------|
| 1. <a href="#">TKT1_ECOLI</a>  | 72451  | 75    | Transketolase 1 OS=Escherichia coli (strain K12) OX=83333 GN=tktA PE=1 SV=5                              |
| 2. <a href="#">RS1_DICD3</a>   | 61334  | 63    | 30S ribosomal protein S1 OS=Dickeya dadantii (strain 3937) OX=198628 GN=rpsA PE=3 SV=2                   |
| 3. <a href="#">RS1_ECO57</a>   | 61235  | 63    | 30S ribosomal protein S1 OS=Escherichia coli O157:H7 OX=83334 GN=rpsA PE=3 SV=1                          |
| 4. <a href="#">RS1_ECOL6</a>   | 61235  | 63    | 30S ribosomal protein S1 OS=Escherichia coli O6:H1 (strain CFT073 / ATCC 700928 / UPEC) OX=199310 GN=rp  |
| 5. <a href="#">RS1_ECOLI</a>   | 61235  | 63    | 30S ribosomal protein S1 OS=Escherichia coli (strain K12) OX=83333 GN=rpsA PE=1 SV=1                     |
| 6. <a href="#">RS1_SHIFL</a>   | 61235  | 63    | 30S ribosomal protein S1 OS=Shigella flexneri OX=623 GN=rpsA PE=3 SV=1                                   |
| 7. <a href="#">ATPG_BACCA</a>  | 32323  | 61    | ATP synthase gamma chain OS=Bacillus caldotenax OX=1395 GN=atpG PE=3 SV=1                                |
| 8. <a href="#">DXR_CLOMB</a>   | 43041  | 57    | 1-deoxy-D-xylulose 5-phosphate reductoisomerase OS=Clostridium botulinum (strain Loch Maree / Type A3) ( |
| 9. <a href="#">DXR_CLOB6</a>   | 43168  | 56    | 1-deoxy-D-xylulose 5-phosphate reductoisomerase OS=Clostridium botulinum (strain 657 / Type Ba4) OX=5151 |
| 10. <a href="#">DXR_CLOBJ</a>  | 43182  | 56    | 1-deoxy-D-xylulose 5-phosphate reductoisomerase OS=Clostridium botulinum (strain Kyoto / Type A2) OX=531 |
| 11. <a href="#">DXR_CLOBL</a>  | 43212  | 56    | 1-deoxy-D-xylulose 5-phosphate reductoisomerase OS=Clostridium botulinum (strain Langeland / NCTC 10281  |
| 12. <a href="#">DXR_CLOBK</a>  | 43169  | 55    | 1-deoxy-D-xylulose 5-phosphate reductoisomerase OS=Clostridium botulinum (strain Okra / Type B1) OX=498: |
| 13. <a href="#">ERA_LACH4</a>  | 34027  | 54    | GPase Era OS=Lactobacillus helveticus (strain DPC 4571) OX=405566 GN=era PE=3 SV=1                       |
| 14. <a href="#">ASSY_SOLVE</a> | 50458  | 54    | Argininosuccinate synthase OS=Solibacter usitatus (strain Ellin6076) OX=234267 GN=argG PE=3 SV=1         |
| 15. <a href="#">IOLG_RUBXD</a> | 37446  | 54    | Inositol 2-dehydrogenase OS=Rubrobacter xylanophilus (strain DSM 9941 / NBRC 16129) OX=266117 GN=iolG PI |
| 16. <a href="#">UREG_RHOPE</a> | 22253  | 53    | Urease accessory protein UreG OS=Rhodospseudomonas palustris (strain BisB18) OX=316056 GN=ureG PE=3 SV=1 |
| 17. <a href="#">CCPA_STAEQ</a> | 36500  | 53    | Catabolite control protein A OS=Staphylococcus epidermidis (strain ATCC 35984 / RP62A) OX=176279 GN=ccp1 |
| 18. <a href="#">CCPA_STAES</a> | 36500  | 53    | Catabolite control protein A OS=Staphylococcus epidermidis (strain ATCC 12228) OX=176280 GN=ccpA PE=3 SV |
| 19. <a href="#">ACKA_PORG3</a> | 43586  | 52    | Acetate kinase OS=Porphyromonas gingivalis (strain ATCC 33277 / DSM 20709 / CIP 103683 / JCM 12257 / NC' |
| 20. <a href="#">RPOC_PSYCK</a> | 155806 | 52    | DNA-directed RNA polymerase subunit beta' OS=Psychrobacter cryohalolentis (strain K5) OX=335284 GN=rpoC  |

**Results List**

|                                                                                                                                                                                                                                                                                                                                                                                                                                                                                                                                                                                                                                                                                                                                                                                                                                                                                                                                                                                                                                                                                                                                                                           |                            |                 |                 |                |              |            |             |             |                             |
|---------------------------------------------------------------------------------------------------------------------------------------------------------------------------------------------------------------------------------------------------------------------------------------------------------------------------------------------------------------------------------------------------------------------------------------------------------------------------------------------------------------------------------------------------------------------------------------------------------------------------------------------------------------------------------------------------------------------------------------------------------------------------------------------------------------------------------------------------------------------------------------------------------------------------------------------------------------------------------------------------------------------------------------------------------------------------------------------------------------------------------------------------------------------------|----------------------------|-----------------|-----------------|----------------|--------------|------------|-------------|-------------|-----------------------------|
| 1.                                                                                                                                                                                                                                                                                                                                                                                                                                                                                                                                                                                                                                                                                                                                                                                                                                                                                                                                                                                                                                                                                                                                                                        | <a href="#">TKT1_ECOLI</a> | Mass: 72451     | Score: 75       | Expect: 0.0096 | Matches: 6   |            |             |             |                             |
| Transketolase 1 OS=Escherichia coli (strain K12) OX=83333 GN=tktA PE=1 SV=5                                                                                                                                                                                                                                                                                                                                                                                                                                                                                                                                                                                                                                                                                                                                                                                                                                                                                                                                                                                                                                                                                               |                            |                 |                 |                |              |            |             |             |                             |
|                                                                                                                                                                                                                                                                                                                                                                                                                                                                                                                                                                                                                                                                                                                                                                                                                                                                                                                                                                                                                                                                                                                                                                           | <b>Observed</b>            | <b>Mr(expt)</b> | <b>Mr(calc)</b> | <b>ppm</b>     | <b>Start</b> | <b>End</b> | <b>Miss</b> | <b>Ions</b> | <b>Peptide</b>              |
|                                                                                                                                                                                                                                                                                                                                                                                                                                                                                                                                                                                                                                                                                                                                                                                                                                                                                                                                                                                                                                                                                                                                                                           | 1033.5958                  | 1032.5885       | 1032.5604       | 27.2           | 245          | -          | 254         | 0           | K.TIIFGSPNK.A               |
|                                                                                                                                                                                                                                                                                                                                                                                                                                                                                                                                                                                                                                                                                                                                                                                                                                                                                                                                                                                                                                                                                                                                                                           | 1277.7589                  | 1276.7516       | 1276.6353       | 91.1           | 205          | -          | 214         | 0           | R.FEAYGWHVIR.D              |
|                                                                                                                                                                                                                                                                                                                                                                                                                                                                                                                                                                                                                                                                                                                                                                                                                                                                                                                                                                                                                                                                                                                                                                           | 1329.7326                  | 1328.7254       | 1328.7452       | -14.93         | 343          | -          | 354         | 1           | K.EFTAKLQANPAK.I            |
|                                                                                                                                                                                                                                                                                                                                                                                                                                                                                                                                                                                                                                                                                                                                                                                                                                                                                                                                                                                                                                                                                                                                                                           | 1983.1414                  | 1982.1341       | 1982.0261       | 54.5           | 604          | -          | 621         | 1           | K.AVTARVAVEAGIADYWYK.Y      |
|                                                                                                                                                                                                                                                                                                                                                                                                                                                                                                                                                                                                                                                                                                                                                                                                                                                                                                                                                                                                                                                                                                                                                                           | 1989.1250                  | 1988.1177       | 1987.9712       | 73.7           | 255          | -          | 274         | 0           | 63 K.AGTHDSHGAPLGDAEIALTR.E |
|                                                                                                                                                                                                                                                                                                                                                                                                                                                                                                                                                                                                                                                                                                                                                                                                                                                                                                                                                                                                                                                                                                                                                                           | 2001.0988                  | 2000.0915       | 1999.9309       | 80.3           | 580          | -          | 597         | 1           | R.VVSMPTDAFDKQDAAYR.E       |
| <b>No match to:</b> 720.3201, 721.3315, 724.3214, 804.3108, 842.5642, 865.5456, 870.5940, 881.3242, 969.5548, 973.5948, 982.5138, 1037.6072, 1045.6282, 1047.6804, 1064.6488, 1072.6447, 1077.2496, 1082.6362, 1093.6181, 1107.6212, 1109.5910, 1118.5838, 1140.6515, 1153.6950, 1163.6855, 1164.6754, 1165.6684, 1179.6771, 1184.6858, 1193.6977, 1195.6893, 1201.7343, 1229.8974, 1232.6901, 1253.7005, 1259.2801, 1259.7540, 1263.2247, 1263.7024, 1266.7035, 1280.7521, 1283.7721, 1302.8009, 1306.7653, 1308.7528, 1310.3027, 1320.6798, 1323.2817, 1323.7637, 1324.7890, 1326.3207, 1332.7618, 1340.7775, 1343.7777, 1357.7890, 1365.7525, 1373.7532, 1390.8324, 1393.8069, 1407.7954, 1422.8033, 1434.8643, 1460.8550, 1475.8557, 1490.8367, 1493.8451, 1549.8969, 1598.9377, 1638.9642, 1657.9317, 1684.0126, 1699.9639, 1707.9051, 1716.9715, 1740.9356, 1781.0033, 1789.0003, 1791.8887, 1804.0297, 1839.0630, 1847.0491, 1852.0436, 2083.1533, 2128.1603, 2211.2706, 2215.3315, 2286.2807, 2299.3189, 2329.2726, 2343.2471, 2384.1325, 2399.2011, 2441.2881, 2501.4182, 2510.3224, 2705.3310, 2717.2530, 2848.5165, 2869.5420, 3223.3745, 3264.5742, 3312.3559 |                            |                 |                 |                |              |            |             |             |                             |
| 2.                                                                                                                                                                                                                                                                                                                                                                                                                                                                                                                                                                                                                                                                                                                                                                                                                                                                                                                                                                                                                                                                                                                                                                        | <a href="#">RS1_DICD3</a>  | Mass: 61334     | Score: 63       | Expect: 0.18   | Matches: 2   |            |             |             |                             |
| 30S ribosomal protein S1 OS=Dickeya dadantii (strain 3937) OX=198628 GN=rpsA PE=3 SV=2                                                                                                                                                                                                                                                                                                                                                                                                                                                                                                                                                                                                                                                                                                                                                                                                                                                                                                                                                                                                                                                                                    |                            |                 |                 |                |              |            |             |             |                             |
|                                                                                                                                                                                                                                                                                                                                                                                                                                                                                                                                                                                                                                                                                                                                                                                                                                                                                                                                                                                                                                                                                                                                                                           | <b>Observed</b>            | <b>Mr(expt)</b> | <b>Mr(calc)</b> | <b>ppm</b>     | <b>Start</b> | <b>End</b> | <b>Miss</b> | <b>Ions</b> | <b>Peptide</b>              |
|                                                                                                                                                                                                                                                                                                                                                                                                                                                                                                                                                                                                                                                                                                                                                                                                                                                                                                                                                                                                                                                                                                                                                                           | 1329.7326                  | 1328.7254       | 1328.7664       | -30.87         | 451          | -          | 464         | 1           | K.GAIVTKVTAVDAK.G           |
|                                                                                                                                                                                                                                                                                                                                                                                                                                                                                                                                                                                                                                                                                                                                                                                                                                                                                                                                                                                                                                                                                                                                                                           | 1549.8969                  | 1548.8896       | 1548.7784       | 71.8           | 465          | -          | 479         | 0           | 63 K.GATVELADGVEGYLR.A      |
| <b>No match to:</b> 720.3201, 721.3315, 724.3214, 804.3108, 842.5642, 865.5456, 870.5940, 881.3242, 969.5548, 973.5948, 982.5138, 1033.5958, 1037.6072, 1045.6282, 1047.6804, 1064.6488, 1072.6447, 1077.2496, 1082.6362, 1093.6181, 1107.6212, 1109.5910,                                                                                                                                                                                                                                                                                                                                                                                                                                                                                                                                                                                                                                                                                                                                                                                                                                                                                                                |                            |                 |                 |                |              |            |             |             |                             |

1118.5838, 1140.6515, 1153.6950, 1163.6855, 1164.6754, 1165.6684, 1179.6771, 1184.6858, 1193.6977, 1195.6893, 1201.7343, 1229.8974, 1232.6901, 1253.7005, 1259.2801, 1259.7540, 1263.2247, 1263.7024, 1266.7035, 1277.7589, 1280.7521, 1283.7721, 1302.8009, 1306.7653, 1308.7528, 1310.3027, 1320.6798, 1323.2817, 1323.7637, 1324.7890, 1326.3207, 1332.7618, 1340.7775, 1343.7777, 1357.7890, 1365.7525, 1373.7532, 1390.8324, 1393.8069, 1407.7954, 1422.8033, 1434.8643, 1460.8550, 1475.8557, 1490.8367, 1493.8451, 1598.9377, 1638.9642, 1657.9317, 1684.0126, 1699.9639, 1707.9051, 1716.9715, 1740.9356, 1781.0033, 1789.0003, 1791.8887, 1804.0297, 1839.0630, 1847.0491, 1852.0436, 1983.1414, 1989.1250, 2001.0988, 2083.1533, 2128.1603, 2211.2706, 2215.3315, 2286.2807, 2299.3189, 2329.2726, 2343.2471, 2384.1325, 2399.2011, 2441.2881, 2501.4182, 2510.3224, 2705.3310, 2717.2530, 2848.5165, 2869.5420, 3223.3745, 3264.5742, 3312.3559

3. [RSI\\_EC057](#) Mass: 61235 Score: 63 Expect: 0.18 Matches: 2  
 30S ribosomal protein S1 OS=Escherichia coli O157:H7 OX=83334 GN=rpsA PE=3 SV=1  
**Observed Mr(expt) Mr(calc) ppm Start End Miss Ions Peptide**  
 1329.7326 1328.7254 1328.7664 -30.87 451 - 464 1 --- K.GAIVTGKVTAVDAK.G  
 1549.8969 1548.8896 1548.7784 71.8 465 - 479 0 63 K.GATVELADGVEGYLR.A  
**No match to:** 720.3201, 721.3315, 724.3214, 804.3108, 842.5642, 865.5456, 870.5940, 881.3242, 969.5548, 973.5948, 982.5138, 1033.5958, 1037.6072, 1045.6282, 1047.6804, 1064.6488, 1072.6447, 1077.2496, 1082.6362, 1093.6181, 1107.6212, 1109.5910, 1118.5838, 1140.6515, 1153.6950, 1163.6855, 1164.6754, 1165.6684, 1179.6771, 1184.6858, 1193.6977, 1195.6893, 1201.7343, 1229.8974, 1232.6901, 1253.7005, 1259.2801, 1259.7540, 1263.2247, 1263.7024, 1266.7035, 1277.7589, 1280.7521, 1283.7721, 1302.8009, 1306.7653, 1308.7528, 1310.3027, 1320.6798, 1323.2817, 1323.7637, 1324.7890, 1326.3207, 1332.7618, 1340.7775, 1343.7777, 1357.7890, 1365.7525, 1373.7532, 1390.8324, 1393.8069, 1407.7954, 1422.8033, 1434.8643, 1460.8550, 1475.8557, 1490.8367, 1493.8451, 1598.9377, 1638.9642, 1657.9317, 1684.0126, 1699.9639, 1707.9051, 1716.9715, 1740.9356, 1781.0033, 1789.0003, 1791.8887, 1804.0297, 1839.0630, 1847.0491, 1852.0436, 1983.1414, 1989.1250, 2001.0988, 2083.1533, 2128.1603, 2211.2706, 2215.3315, 2286.2807, 2299.3189, 2329.2726, 2343.2471, 2384.1325, 2399.2011, 2441.2881, 2501.4182, 2510.3224, 2705.3310, 2717.2530, 2848.5165, 2869.5420, 3223.3745, 3264.5742, 3312.3559

4. [RSI\\_EC0L6](#) Mass: 61235 Score: 63 Expect: 0.18 Matches: 2  
 30S ribosomal protein S1 OS=Escherichia coli O6:H1 (strain CFT073 / ATCC 700928 / UPEC) OX=199310 GN=rpsA PE=3 SV=1  
**Observed Mr(expt) Mr(calc) ppm Start End Miss Ions Peptide**  
 1329.7326 1328.7254 1328.7664 -30.87 451 - 464 1 --- K.GAIVTGKVTAVDAK.G  
 1549.8969 1548.8896 1548.7784 71.8 465 - 479 0 63 K.GATVELADGVEGYLR.A  
**No match to:** 720.3201, 721.3315, 724.3214, 804.3108, 842.5642, 865.5456, 870.5940, 881.3242, 969.5548, 973.5948, 982.5138, 1033.5958, 1037.6072, 1045.6282, 1047.6804, 1064.6488, 1072.6447, 1077.2496, 1082.6362, 1093.6181, 1107.6212, 1109.5910, 1118.5838, 1140.6515, 1153.6950, 1163.6855, 1164.6754, 1165.6684, 1179.6771, 1184.6858, 1193.6977, 1195.6893, 1201.7343, 1229.8974, 1232.6901, 1253.7005, 1259.2801, 1259.7540, 1263.2247, 1263.7024, 1266.7035, 1277.7589, 1280.7521, 1283.7721, 1302.8009, 1306.7653, 1308.7528, 1310.3027, 1320.6798, 1323.2817, 1323.7637, 1324.7890, 1326.3207, 1332.7618, 1340.7775, 1343.7777, 1357.7890, 1365.7525, 1373.7532, 1390.8324, 1393.8069, 1407.7954, 1422.8033, 1434.8643, 1460.8550, 1475.8557, 1490.8367, 1493.8451, 1598.9377, 1638.9642, 1657.9317, 1684.0126, 1699.9639, 1707.9051, 1716.9715, 1740.9356, 1781.0033, 1789.0003, 1791.8887, 1804.0297, 1839.0630, 1847.0491, 1852.0436, 1983.1414, 1989.1250, 2001.0988, 2083.1533, 2128.1603, 2211.2706, 2215.3315, 2286.2807, 2299.3189, 2329.2726, 2343.2471, 2384.1325, 2399.2011, 2441.2881, 2501.4182, 2510.3224, 2705.3310, 2717.2530, 2848.5165, 2869.5420, 3223.3745, 3264.5742, 3312.3559

5. [RSI\\_EC0LI](#) Mass: 61235 Score: 63 Expect: 0.18 Matches: 2  
 30S ribosomal protein S1 OS=Escherichia coli (strain K12) OX=83333 GN=rpsA PE=1 SV=1  
**Observed Mr(expt) Mr(calc) ppm Start End Miss Ions Peptide**  
 1329.7326 1328.7254 1328.7664 -30.87 451 - 464 1 --- K.GAIVTGKVTAVDAK.G  
 1549.8969 1548.8896 1548.7784 71.8 465 - 479 0 63 K.GATVELADGVEGYLR.A  
**No match to:** 720.3201, 721.3315, 724.3214, 804.3108, 842.5642, 865.5456, 870.5940, 881.3242, 969.5548, 973.5948, 982.5138, 1033.5958, 1037.6072, 1045.6282, 1047.6804, 1064.6488, 1072.6447, 1077.2496, 1082.6362, 1093.6181, 1107.6212, 1109.5910, 1118.5838, 1140.6515, 1153.6950, 1163.6855, 1164.6754, 1165.6684, 1179.6771, 1184.6858, 1193.6977, 1195.6893, 1201.7343, 1229.8974, 1232.6901, 1253.7005, 1259.2801, 1259.7540, 1263.2247, 1263.7024, 1266.7035, 1277.7589, 1280.7521, 1283.7721, 1302.8009, 1306.7653, 1308.7528, 1310.3027, 1320.6798, 1323.2817, 1323.7637, 1324.7890, 1326.3207, 1332.7618, 1340.7775, 1343.7777, 1357.7890, 1365.7525, 1373.7532, 1390.8324, 1393.8069, 1407.7954, 1422.8033, 1434.8643, 1460.8550, 1475.8557, 1490.8367, 1493.8451, 1598.9377, 1638.9642, 1657.9317, 1684.0126, 1699.9639, 1707.9051, 1716.9715, 1740.9356, 1781.0033, 1789.0003, 1791.8887, 1804.0297, 1839.0630, 1847.0491, 1852.0436, 1983.1414, 1989.1250, 2001.0988, 2083.1533, 2128.1603, 2211.2706, 2215.3315, 2286.2807, 2299.3189, 2329.2726, 2343.2471, 2384.1325, 2399.2011, 2441.2881, 2501.4182, 2510.3224, 2705.3310, 2717.2530, 2848.5165, 2869.5420, 3223.3745, 3264.5742, 3312.3559

6. [RSI\\_SHIFL](#) Mass: 61235 Score: 63 Expect: 0.18 Matches: 2  
 30S ribosomal protein S1 OS=Shigella flexneri OX=623 GN=rpsA PE=3 SV=1  
**Observed Mr(expt) Mr(calc) ppm Start End Miss Ions Peptide**  
 1329.7326 1328.7254 1328.7664 -30.87 451 - 464 1 --- K.GAIVTGKVTAVDAK.G  
 1549.8969 1548.8896 1548.7784 71.8 465 - 479 0 63 K.GATVELADGVEGYLR.A  
**No match to:** 720.3201, 721.3315, 724.3214, 804.3108, 842.5642, 865.5456, 870.5940, 881.3242, 969.5548, 973.5948, 982.5138, 1033.5958, 1037.6072, 1045.6282, 1047.6804, 1064.6488, 1072.6447, 1077.2496, 1082.6362, 1093.6181, 1107.6212, 1109.5910, 1118.5838, 1140.6515, 1153.6950, 1163.6855, 1164.6754, 1165.6684, 1179.6771, 1184.6858, 1193.6977, 1195.6893, 1201.7343, 1229.8974, 1232.6901, 1253.7005, 1259.2801, 1259.7540, 1263.2247, 1263.7024, 1266.7035, 1277.7589, 1280.7521, 1283.7721, 1302.8009, 1306.7653, 1308.7528, 1310.3027, 1320.6798, 1323.2817, 1323.7637, 1324.7890, 1326.3207, 1332.7618, 1340.7775, 1343.7777, 1357.7890, 1365.7525, 1373.7532, 1390.8324, 1393.8069, 1407.7954, 1422.8033, 1434.8643, 1460.8550, 1475.8557, 1490.8367, 1493.8451, 1598.9377, 1638.9642, 1657.9317, 1684.0126, 1699.9639, 1707.9051, 1716.9715, 1740.9356, 1781.0033, 1789.0003, 1791.8887, 1804.0297, 1839.0630, 1847.0491, 1852.0436, 1983.1414, 1989.1250, 2001.0988, 2083.1533, 2128.1603, 2211.2706, 2215.3315, 2286.2807, 2299.3189, 2329.2726, 2343.2471, 2384.1325, 2399.2011, 2441.2881, 2501.4182, 2510.3224, 2705.3310, 2717.2530, 2848.5165, 2869.5420, 3223.3745, 3264.5742, 3312.3559

7. [ATPG\\_BACCA](#) Mass: 32323 Score: 61 Expect: 0.27 Matches: 12  
 ATP synthase gamma chain OS=Bacillus caldotenax OX=1395 GN=atpG PE=3 SV=1  
**Observed Mr(expt) Mr(calc) ppm Start End Miss Ions Peptide**  
 1140.6515 1139.6442 1139.7026 -51.22 2 - 11 1 --- M.KPLASLRDIK.T  
 1164.6754 1163.6681 1163.6008 57.8 42 - 50 0 --- R.EIVRPPYMEK.I  
 1266.7035 1265.6962 1265.6914 3.77 64 - 74 0 --- R.SHPLVSRPVK.K + Oxidation (M)  
 1320.6798 1319.6725 1319.7019 -22.31 41 - 50 1 --- K.REIVRPPYMEK.I  
 1332.7618 1331.7545 1331.6867 50.9 51 - 63 0 --- K.IQEVVAMSASAAR.S  
 1343.7777 1342.7704 1342.7391 23.3 130 - 140 1 --- K.RNMPVILDITR.L + Oxidation (M)  
 1373.7532 1372.7459 1372.7602 -10.43 189 - 200 0 --- K.LLPLTDFLAENK.Q  
 1657.9317 1656.9244 1656.9199 2.75 189 - 202 1 --- K.LLPLTDFLAENKQR.T  
 1699.9639 1698.9566 1698.8941 36.8 141 - 155 1 --- R.LPDQPSFADIKEIAR.K  
 1781.0033 1779.9960 1779.8243 96.5 243 - 258 1 --- R.MTAMKNATDNDNVIR.T + Oxidation (M)  
 2399.2011 2398.1938 2398.2566 -26.20 131 - 151 1 --- R.NMPVILDITR.LPDQPSFADIK.E + Oxidation (M)  
 2510.3224 2509.3151 2509.2668 19.2 42 - 63 1 --- R.EIVRPPYMEKIQEVVAMSASAAR.S + 2 Oxidation (M)  
**No match to:** 720.3201, 721.3315, 724.3214, 804.3108, 842.5642, 865.5456, 870.5940, 881.3242, 969.5548, 973.5948, 982.5138, 1033.5958, 1037.6072, 1045.6282, 1047.6804, 1064.6488, 1072.6447, 1077.2496, 1082.6362, 1093.6181, 1107.6212, 1109.5910, 1118.5838, 1153.6950, 1163.6855, 1165.6684, 1179.6771, 1184.6858, 1193.6977, 1195.6893, 1201.7343, 1229.8974, 1232.6901, 1253.7005, 1259.2801, 1259.7540, 1263.2247, 1263.7024, 1277.7589, 1280.7521, 1283.7721, 1302.8009, 1306.7653, 1308.7528, 1310.3027, 1323.2817, 1323.7637, 1324.7890, 1326.3207, 1329.7326, 1340.7775, 1357.7890, 1365.7525, 1390.8324, 1393.8069, 1407.7954, 1422.8033, 1434.8643, 1460.8550, 1475.8557, 1490.8367, 1493.8451, 1549.8969, 1598.9377, 1638.9642, 1684.0126, 1707.9051, 1716.9715, 1740.9356, 1789.0003, 1791.8887, 1804.0297, 1839.0630, 1847.0491, 1852.0436, 1983.1414, 1989.1250, 2001.0988, 2083.1533, 2128.1603, 2211.2706, 2215.3315, 2286.2807, 2299.3189, 2329.2726, 2343.2471, 2384.1325, 2399.2011, 2441.2881, 2501.4182, 2705.3310, 2717.2530, 2848.5165, 2869.5420, 3223.3745, 3264.5742, 3312.3559

8. [DXR\\_CLOBM](#) Mass: 43041 Score: 57 Expect: 0.73 Matches: 12

1-deoxy-D-xylulose 5-phosphate reductoisomerase OS=Clostridium botulinum (strain Loch Maree / Type A3) OX=498214 GN=dxr PE=3 SV=

| Observed                                                                                                                                                                                                                                                                                                                                                                                                                                                                                                                                                                                                                                                                                                                                                                                                                                                                                                                                                                                                                                                                                                 | Mr (expt) | Mr (calc) | ppm    | Start | End | Miss | Ions | Peptide                                           |
|----------------------------------------------------------------------------------------------------------------------------------------------------------------------------------------------------------------------------------------------------------------------------------------------------------------------------------------------------------------------------------------------------------------------------------------------------------------------------------------------------------------------------------------------------------------------------------------------------------------------------------------------------------------------------------------------------------------------------------------------------------------------------------------------------------------------------------------------------------------------------------------------------------------------------------------------------------------------------------------------------------------------------------------------------------------------------------------------------------|-----------|-----------|--------|-------|-----|------|------|---------------------------------------------------|
| 842.5642                                                                                                                                                                                                                                                                                                                                                                                                                                                                                                                                                                                                                                                                                                                                                                                                                                                                                                                                                                                                                                                                                                 | 841.5569  | 841.5637  | -8.05  | 41    | -   | 47   | 1    | K.KVIEIIK.E                                       |
| 1193.6977                                                                                                                                                                                                                                                                                                                                                                                                                                                                                                                                                                                                                                                                                                                                                                                                                                                                                                                                                                                                                                                                                                | 1192.6904 | 1192.6815 | 7.46   | 30    | -   | 40   | 1    | K.LVAISANKSYK.K                                   |
| 1320.6798                                                                                                                                                                                                                                                                                                                                                                                                                                                                                                                                                                                                                                                                                                                                                                                                                                                                                                                                                                                                                                                                                                | 1319.6725 | 1319.7119 | -29.82 | 207   | -   | 218  | 1    | R.KISIDSATLMNK.G                                  |
| 1329.7326                                                                                                                                                                                                                                                                                                                                                                                                                                                                                                                                                                                                                                                                                                                                                                                                                                                                                                                                                                                                                                                                                                | 1328.7254 | 1328.7299 | -3.44  | 113   | -   | 125  | 1    | K.AIESGKDIALANK.E                                 |
| 1343.7777                                                                                                                                                                                                                                                                                                                                                                                                                                                                                                                                                                                                                                                                                                                                                                                                                                                                                                                                                                                                                                                                                                | 1342.7704 | 1342.8224 | -38.72 | 42    | -   | 52   | 1    | K.VIEIIEKPKPK.Y                                   |
| 1357.7890                                                                                                                                                                                                                                                                                                                                                                                                                                                                                                                                                                                                                                                                                                                                                                                                                                                                                                                                                                                                                                                                                                | 1356.7817 | 1356.7864 | -3.46  | 126   | -   | 138  | 0    | K.ETLVVAGELVISK.A                                 |
| 1716.9715                                                                                                                                                                                                                                                                                                                                                                                                                                                                                                                                                                                                                                                                                                                                                                                                                                                                                                                                                                                                                                                                                                | 1715.9642 | 1715.9206 | 25.4   | 166   | -   | 181  | 1    | K.EEVKNIIVTASGGPFR.G                              |
| 1852.0436                                                                                                                                                                                                                                                                                                                                                                                                                                                                                                                                                                                                                                                                                                                                                                                                                                                                                                                                                                                                                                                                                                | 1851.0364 | 1850.9713 | 35.2   | 238   | -   | 253  | 0    | K.VVVHPQIVHSMVEYK.D                               |
| 2083.1533                                                                                                                                                                                                                                                                                                                                                                                                                                                                                                                                                                                                                                                                                                                                                                                                                                                                                                                                                                                                                                                                                                | 2082.1461 | 2082.1936 | -22.83 | 119   | -   | 138  | 1    | K.DIALANKETLVVAGELVISK.A                          |
| 2128.1603                                                                                                                                                                                                                                                                                                                                                                                                                                                                                                                                                                                                                                                                                                                                                                                                                                                                                                                                                                                                                                                                                                | 2127.1531 | 2127.1398 | 6.23   | 318   | -   | 338  | 0    | K.GGVMPAILNGANEVAVDLFLK.G                         |
| 2329.2726                                                                                                                                                                                                                                                                                                                                                                                                                                                                                                                                                                                                                                                                                                                                                                                                                                                                                                                                                                                                                                                                                                | 2328.2653 | 2328.2511 | 6.10   | 318   | -   | 340  | 1    | K.GGVMPAILNGANEVAVDLFLKGI + Oxidation (M)         |
| 3312.3559                                                                                                                                                                                                                                                                                                                                                                                                                                                                                                                                                                                                                                                                                                                                                                                                                                                                                                                                                                                                                                                                                                | 3311.3486 | 3311.6353 | -86.54 | 238   | -   | 267  | 1    | K.VVVHPQIVHSMVEYKDGSVIAQMATPDMK.L + Oxidation (M) |
| <b>No match to:</b> 720.3201, 721.3315, 724.3214, 804.3108, 865.5456, 870.5940, 881.3242, 969.5548, 973.5948, 982.5138, 1033.5958, 1037.6072, 1045.6282, 1047.6804, 1064.6488, 1072.6447, 1077.2496, 1082.6362, 1093.6181, 1107.6212, 1109.5910, 1118.5838, 1140.6515, 1153.6950, 1163.6855, 1164.6754, 1165.6684, 1179.6771, 1184.6858, 1195.6893, 1201.7343, 1229.8974, 1232.6901, 1253.7005, 1259.2801, 1259.7540, 1263.2247, 1263.7024, 1266.7035, 1277.7589, 1280.7521, 1283.7721, 1302.8009, 1306.7653, 1308.7528, 1310.3027, 1323.2817, 1323.7637, 1324.7890, 1326.3207, 1332.7618, 1340.7775, 1365.7525, 1373.7532, 1390.8324, 1393.8069, 1407.7954, 1422.8033, 1434.8643, 1460.8550, 1475.8557, 1490.8367, 1493.8451, 1549.8969, 1598.9377, 1638.9642, 1657.9317, 1684.0126, 1699.9639, 1707.9051, 1740.9356, 1781.0033, 1789.0003, 1791.8887, 1804.0297, 1839.0630, 1847.0491, 1983.1414, 1989.1250, 2001.0988, 2211.2706, 2215.3315, 2286.2807, 2299.3189, 2343.2471, 2384.1325, 2399.2011, 2441.2881, 2501.4182, 2510.3224, 2705.3310, 2717.2530, 2848.5165, 2869.5420, 3223.3745, 3264.5742 |           |           |        |       |     |      |      |                                                   |

9. [DXR\\_CLOB6](#) Mass: 43168 Score: 56 Expect: 0.94 Matches: 12

1-deoxy-D-xylulose 5-phosphate reductoisomerase OS=Clostridium botulinum (strain 657 / Type Ba4) OX=515621 GN=dxr PE=3 SV=1

| Observed                                                                                                                                                                                                                                                                                                                                                                                                                                                                                                                                                                                                                                                                                                                                                                                                                                                                                                                                                                                                                                                                                                 | Mr (expt) | Mr (calc) | ppm    | Start | End | Miss | Ions | Peptide                                           |
|----------------------------------------------------------------------------------------------------------------------------------------------------------------------------------------------------------------------------------------------------------------------------------------------------------------------------------------------------------------------------------------------------------------------------------------------------------------------------------------------------------------------------------------------------------------------------------------------------------------------------------------------------------------------------------------------------------------------------------------------------------------------------------------------------------------------------------------------------------------------------------------------------------------------------------------------------------------------------------------------------------------------------------------------------------------------------------------------------------|-----------|-----------|--------|-------|-----|------|------|---------------------------------------------------|
| 842.5642                                                                                                                                                                                                                                                                                                                                                                                                                                                                                                                                                                                                                                                                                                                                                                                                                                                                                                                                                                                                                                                                                                 | 841.5569  | 841.5637  | -8.05  | 41    | -   | 47   | 1    | K.KVIEIIK.E                                       |
| 1193.6977                                                                                                                                                                                                                                                                                                                                                                                                                                                                                                                                                                                                                                                                                                                                                                                                                                                                                                                                                                                                                                                                                                | 1192.6904 | 1192.6815 | 7.46   | 30    | -   | 40   | 1    | K.LVAISANKSYK.K                                   |
| 1320.6798                                                                                                                                                                                                                                                                                                                                                                                                                                                                                                                                                                                                                                                                                                                                                                                                                                                                                                                                                                                                                                                                                                | 1319.6725 | 1319.7119 | -29.82 | 207   | -   | 218  | 1    | R.KISIDSATLMNK.G                                  |
| 1329.7326                                                                                                                                                                                                                                                                                                                                                                                                                                                                                                                                                                                                                                                                                                                                                                                                                                                                                                                                                                                                                                                                                                | 1328.7254 | 1328.7299 | -3.44  | 113   | -   | 125  | 1    | K.AIESGKDIALANK.E                                 |
| 1343.7777                                                                                                                                                                                                                                                                                                                                                                                                                                                                                                                                                                                                                                                                                                                                                                                                                                                                                                                                                                                                                                                                                                | 1342.7704 | 1342.8224 | -38.72 | 42    | -   | 52   | 1    | K.VIEIIEKPKPK.Y                                   |
| 1357.7890                                                                                                                                                                                                                                                                                                                                                                                                                                                                                                                                                                                                                                                                                                                                                                                                                                                                                                                                                                                                                                                                                                | 1356.7817 | 1356.7864 | -3.46  | 126   | -   | 138  | 0    | K.ETLVVAGELVISK.A                                 |
| 1716.9715                                                                                                                                                                                                                                                                                                                                                                                                                                                                                                                                                                                                                                                                                                                                                                                                                                                                                                                                                                                                                                                                                                | 1715.9642 | 1715.9206 | 25.4   | 166   | -   | 181  | 1    | K.EEVKNIIVTASGGPFR.G                              |
| 1852.0436                                                                                                                                                                                                                                                                                                                                                                                                                                                                                                                                                                                                                                                                                                                                                                                                                                                                                                                                                                                                                                                                                                | 1851.0364 | 1850.9713 | 35.2   | 238   | -   | 253  | 0    | K.VVVHPQIVHSMVEYK.D                               |
| 2083.1533                                                                                                                                                                                                                                                                                                                                                                                                                                                                                                                                                                                                                                                                                                                                                                                                                                                                                                                                                                                                                                                                                                | 2082.1461 | 2082.1936 | -22.83 | 119   | -   | 138  | 1    | K.DIALANKETLVVAGELVISK.A                          |
| 2128.1603                                                                                                                                                                                                                                                                                                                                                                                                                                                                                                                                                                                                                                                                                                                                                                                                                                                                                                                                                                                                                                                                                                | 2127.1531 | 2127.1398 | 6.23   | 318   | -   | 338  | 0    | K.GGVMPAILNGANEVAVDLFLK.G                         |
| 2329.2726                                                                                                                                                                                                                                                                                                                                                                                                                                                                                                                                                                                                                                                                                                                                                                                                                                                                                                                                                                                                                                                                                                | 2328.2653 | 2328.2511 | 6.10   | 318   | -   | 340  | 1    | K.GGVMPAILNGANEVAVDLFLKGI + Oxidation (M)         |
| 3312.3559                                                                                                                                                                                                                                                                                                                                                                                                                                                                                                                                                                                                                                                                                                                                                                                                                                                                                                                                                                                                                                                                                                | 3311.3486 | 3311.6353 | -86.54 | 238   | -   | 267  | 1    | K.VVVHPQIVHSMVEYKDGSVIAQMATPDMK.L + Oxidation (M) |
| <b>No match to:</b> 720.3201, 721.3315, 724.3214, 804.3108, 865.5456, 870.5940, 881.3242, 969.5548, 973.5948, 982.5138, 1033.5958, 1037.6072, 1045.6282, 1047.6804, 1064.6488, 1072.6447, 1077.2496, 1082.6362, 1093.6181, 1107.6212, 1109.5910, 1118.5838, 1140.6515, 1153.6950, 1163.6855, 1164.6754, 1165.6684, 1179.6771, 1184.6858, 1195.6893, 1201.7343, 1229.8974, 1232.6901, 1253.7005, 1259.2801, 1259.7540, 1263.2247, 1263.7024, 1266.7035, 1277.7589, 1280.7521, 1283.7721, 1302.8009, 1306.7653, 1308.7528, 1310.3027, 1323.2817, 1323.7637, 1324.7890, 1326.3207, 1332.7618, 1340.7775, 1365.7525, 1373.7532, 1390.8324, 1393.8069, 1407.7954, 1422.8033, 1434.8643, 1460.8550, 1475.8557, 1490.8367, 1493.8451, 1549.8969, 1598.9377, 1638.9642, 1657.9317, 1684.0126, 1699.9639, 1707.9051, 1740.9356, 1781.0033, 1789.0003, 1791.8887, 1804.0297, 1839.0630, 1847.0491, 1983.1414, 1989.1250, 2001.0988, 2211.2706, 2215.3315, 2286.2807, 2299.3189, 2343.2471, 2384.1325, 2399.2011, 2441.2881, 2501.4182, 2510.3224, 2705.3310, 2717.2530, 2848.5165, 2869.5420, 3223.3745, 3264.5742 |           |           |        |       |     |      |      |                                                   |

10. [DXR\\_CLOBJ](#) Mass: 43182 Score: 56 Expect: 0.94 Matches: 12

1-deoxy-D-xylulose 5-phosphate reductoisomerase OS=Clostridium botulinum (strain Kyoto / Type A2) OX=536232 GN=dxr PE=3 SV=1

| Observed                                                                                                                                                                                                                                                                                                                                                                                                                                                                                                                                                                                                                                                                                                                                                                                                                                                                                                                                                                                                                                                                                                 | Mr (expt) | Mr (calc) | ppm    | Start | End | Miss | Ions | Peptide                                           |
|----------------------------------------------------------------------------------------------------------------------------------------------------------------------------------------------------------------------------------------------------------------------------------------------------------------------------------------------------------------------------------------------------------------------------------------------------------------------------------------------------------------------------------------------------------------------------------------------------------------------------------------------------------------------------------------------------------------------------------------------------------------------------------------------------------------------------------------------------------------------------------------------------------------------------------------------------------------------------------------------------------------------------------------------------------------------------------------------------------|-----------|-----------|--------|-------|-----|------|------|---------------------------------------------------|
| 842.5642                                                                                                                                                                                                                                                                                                                                                                                                                                                                                                                                                                                                                                                                                                                                                                                                                                                                                                                                                                                                                                                                                                 | 841.5569  | 841.5637  | -8.05  | 41    | -   | 47   | 1    | K.KVIEIIK.E                                       |
| 1193.6977                                                                                                                                                                                                                                                                                                                                                                                                                                                                                                                                                                                                                                                                                                                                                                                                                                                                                                                                                                                                                                                                                                | 1192.6904 | 1192.6815 | 7.46   | 30    | -   | 40   | 1    | K.LVAISANKSYK.K                                   |
| 1320.6798                                                                                                                                                                                                                                                                                                                                                                                                                                                                                                                                                                                                                                                                                                                                                                                                                                                                                                                                                                                                                                                                                                | 1319.6725 | 1319.7119 | -29.82 | 207   | -   | 218  | 1    | R.KISIDSATLMNK.G                                  |
| 1329.7326                                                                                                                                                                                                                                                                                                                                                                                                                                                                                                                                                                                                                                                                                                                                                                                                                                                                                                                                                                                                                                                                                                | 1328.7254 | 1328.7299 | -3.44  | 113   | -   | 125  | 1    | K.AIESGKDIALANK.E                                 |
| 1343.7777                                                                                                                                                                                                                                                                                                                                                                                                                                                                                                                                                                                                                                                                                                                                                                                                                                                                                                                                                                                                                                                                                                | 1342.7704 | 1342.8224 | -38.72 | 42    | -   | 52   | 1    | K.VIEIIEKPKPK.Y                                   |
| 1357.7890                                                                                                                                                                                                                                                                                                                                                                                                                                                                                                                                                                                                                                                                                                                                                                                                                                                                                                                                                                                                                                                                                                | 1356.7817 | 1356.7864 | -3.46  | 126   | -   | 138  | 0    | K.ETLVVAGELVISK.A                                 |
| 1716.9715                                                                                                                                                                                                                                                                                                                                                                                                                                                                                                                                                                                                                                                                                                                                                                                                                                                                                                                                                                                                                                                                                                | 1715.9642 | 1715.9206 | 25.4   | 166   | -   | 181  | 1    | K.EEVKNIIVTASGGPFR.G                              |
| 1852.0436                                                                                                                                                                                                                                                                                                                                                                                                                                                                                                                                                                                                                                                                                                                                                                                                                                                                                                                                                                                                                                                                                                | 1851.0364 | 1850.9713 | 35.2   | 238   | -   | 253  | 0    | K.VVVHPQIVHSMVEYK.D                               |
| 2083.1533                                                                                                                                                                                                                                                                                                                                                                                                                                                                                                                                                                                                                                                                                                                                                                                                                                                                                                                                                                                                                                                                                                | 2082.1461 | 2082.1936 | -22.83 | 119   | -   | 138  | 1    | K.DIALANKETLVVAGELVISK.A                          |
| 2128.1603                                                                                                                                                                                                                                                                                                                                                                                                                                                                                                                                                                                                                                                                                                                                                                                                                                                                                                                                                                                                                                                                                                | 2127.1531 | 2127.1398 | 6.23   | 318   | -   | 338  | 0    | K.GGVMPAILNGANEVAVDLFLK.G                         |
| 2329.2726                                                                                                                                                                                                                                                                                                                                                                                                                                                                                                                                                                                                                                                                                                                                                                                                                                                                                                                                                                                                                                                                                                | 2328.2653 | 2328.2511 | 6.10   | 318   | -   | 340  | 1    | K.GGVMPAILNGANEVAVDLFLKGI + Oxidation (M)         |
| 3312.3559                                                                                                                                                                                                                                                                                                                                                                                                                                                                                                                                                                                                                                                                                                                                                                                                                                                                                                                                                                                                                                                                                                | 3311.3486 | 3311.6353 | -86.54 | 238   | -   | 267  | 1    | K.VVVHPQIVHSMVEYKDGSVIAQMATPDMK.L + Oxidation (M) |
| <b>No match to:</b> 720.3201, 721.3315, 724.3214, 804.3108, 865.5456, 870.5940, 881.3242, 969.5548, 973.5948, 982.5138, 1033.5958, 1037.6072, 1045.6282, 1047.6804, 1064.6488, 1072.6447, 1077.2496, 1082.6362, 1093.6181, 1107.6212, 1109.5910, 1118.5838, 1140.6515, 1153.6950, 1163.6855, 1164.6754, 1165.6684, 1179.6771, 1184.6858, 1195.6893, 1201.7343, 1229.8974, 1232.6901, 1253.7005, 1259.2801, 1259.7540, 1263.2247, 1263.7024, 1266.7035, 1277.7589, 1280.7521, 1283.7721, 1302.8009, 1306.7653, 1308.7528, 1310.3027, 1323.2817, 1323.7637, 1324.7890, 1326.3207, 1332.7618, 1340.7775, 1365.7525, 1373.7532, 1390.8324, 1393.8069, 1407.7954, 1422.8033, 1434.8643, 1460.8550, 1475.8557, 1490.8367, 1493.8451, 1549.8969, 1598.9377, 1638.9642, 1657.9317, 1684.0126, 1699.9639, 1707.9051, 1740.9356, 1781.0033, 1789.0003, 1791.8887, 1804.0297, 1839.0630, 1847.0491, 1983.1414, 1989.1250, 2001.0988, 2211.2706, 2215.3315, 2286.2807, 2299.3189, 2343.2471, 2384.1325, 2399.2011, 2441.2881, 2501.4182, 2510.3224, 2705.3310, 2717.2530, 2848.5165, 2869.5420, 3223.3745, 3264.5742 |           |           |        |       |     |      |      |                                                   |

11. [DXR\\_CLOBL](#) Mass: 43212 Score: 56 Expect: 0.94 Matches: 12

1-deoxy-D-xylulose 5-phosphate reductoisomerase OS=Clostridium botulinum (strain Langeland / NCTC 10281 / Type F) OX=441772 GN=dxr PE=3 SV=1

| Observed                                                                                                                                                                                                                                                                                                                                                                                                                                                                                                                                                                                                                               | Mr (expt) | Mr (calc) | ppm    | Start | End | Miss | Ions | Peptide                                           |
|----------------------------------------------------------------------------------------------------------------------------------------------------------------------------------------------------------------------------------------------------------------------------------------------------------------------------------------------------------------------------------------------------------------------------------------------------------------------------------------------------------------------------------------------------------------------------------------------------------------------------------------|-----------|-----------|--------|-------|-----|------|------|---------------------------------------------------|
| 842.5642                                                                                                                                                                                                                                                                                                                                                                                                                                                                                                                                                                                                                               | 841.5569  | 841.5637  | -8.05  | 41    | -   | 47   | 1    | K.KVIEIIK.E                                       |
| 1193.6977                                                                                                                                                                                                                                                                                                                                                                                                                                                                                                                                                                                                                              | 1192.6904 | 1192.6815 | 7.46   | 30    | -   | 40   | 1    | K.LVAISANKSYK.K                                   |
| 1320.6798                                                                                                                                                                                                                                                                                                                                                                                                                                                                                                                                                                                                                              | 1319.6725 | 1319.7119 | -29.82 | 207   | -   | 218  | 1    | R.KISIDSATLMNK.G                                  |
| 1329.7326                                                                                                                                                                                                                                                                                                                                                                                                                                                                                                                                                                                                                              | 1328.7254 | 1328.7299 | -3.44  | 113   | -   | 125  | 1    | K.AIESGKDIALANK.E                                 |
| 1343.7777                                                                                                                                                                                                                                                                                                                                                                                                                                                                                                                                                                                                                              | 1342.7704 | 1342.8224 | -38.72 | 42    | -   | 52   | 1    | K.VIEIIEKPKPK.Y                                   |
| 1357.7890                                                                                                                                                                                                                                                                                                                                                                                                                                                                                                                                                                                                                              | 1356.7817 | 1356.7864 | -3.46  | 126   | -   | 138  | 0    | K.ETLVVAGELVISK.A                                 |
| 1716.9715                                                                                                                                                                                                                                                                                                                                                                                                                                                                                                                                                                                                                              | 1715.9642 | 1715.9206 | 25.4   | 166   | -   | 181  | 1    | K.EEVKNIIVTASGGPFR.G                              |
| 1852.0436                                                                                                                                                                                                                                                                                                                                                                                                                                                                                                                                                                                                                              | 1851.0364 | 1850.9713 | 35.2   | 238   | -   | 253  | 0    | K.VVVHPQIVHSMVEYK.D                               |
| 2083.1533                                                                                                                                                                                                                                                                                                                                                                                                                                                                                                                                                                                                                              | 2082.1461 | 2082.1936 | -22.83 | 119   | -   | 138  | 1    | K.DIALANKETLVVAGELVISK.A                          |
| 2128.1603                                                                                                                                                                                                                                                                                                                                                                                                                                                                                                                                                                                                                              | 2127.1531 | 2127.1398 | 6.23   | 318   | -   | 338  | 0    | K.GGVMPAILNGANEVAVDLFLK.G                         |
| 2329.2726                                                                                                                                                                                                                                                                                                                                                                                                                                                                                                                                                                                                                              | 2328.2653 | 2328.2511 | 6.10   | 318   | -   | 340  | 1    | K.GGVMPAILNGANEVAVDLFLKGI + Oxidation (M)         |
| 3312.3559                                                                                                                                                                                                                                                                                                                                                                                                                                                                                                                                                                                                                              | 3311.3486 | 3311.6353 | -86.54 | 238   | -   | 267  | 1    | K.VVVHPQIVHSMVEYKDGSVIAQMATPDMK.L + Oxidation (M) |
| <b>No match to:</b> 720.3201, 721.3315, 724.3214, 804.3108, 865.5456, 870.5940, 881.3242, 969.5548, 973.5948, 982.5138, 1033.5958, 1037.6072, 1045.6282, 1047.6804, 1064.6488, 1072.6447, 1077.2496, 1082.6362, 1093.6181, 1107.6212, 1109.5910, 1118.5838, 1140.6515, 1153.6950, 1163.6855, 1164.6754, 1165.6684, 1179.6771, 1184.6858, 1195.6893, 1201.7343, 1229.8974, 1232.6901, 1253.7005, 1259.2801, 1259.7540, 1263.2247, 1263.7024, 1266.7035, 1277.7589, 1280.7521, 1283.7721, 1302.8009, 1306.7653, 1308.7528, 1310.3027, 1323.2817, 1323.7637, 1324.7890, 1326.3207, 1332.7618, 1340.7775, 1365.7525, 1373.7532, 1390.8324, |           |           |        |       |     |      |      |                                                   |

1393.8069, 1407.7954, 1422.8033, 1434.8643, 1460.8550, 1475.8557, 1490.8367, 1493.8451, 1549.8969, 1598.9377, 1638.9642, 1657.9317, 1684.0126, 1699.9639, 1707.9051, 1740.9356, 1781.0033, 1789.0003, 1791.8887, 1804.0297, 1839.0630, 1847.0491, 1983.1414, 1989.1250, 2001.0988, 2211.2706, 2215.3315, 2286.2807, 2299.3189, 2343.2471, 2384.1325, 2399.2011, 2441.2881, 2501.4182, 2510.3224, 2705.3310, 2717.2530, 2848.5165, 2869.5420, 3223.3745, 3264.5742

12. DXR\_CLOBK Mass: 43169 Score: 55 Expect: 1 Matches: 12
1-deoxy-D-xylulose 5-phosphate reductoisomerase OS=Clostridium botulinum (strain Okra / Type B1) OX=498213 GN=dxr PE=3 SV=1
Observed Mr(expt) Mr(calc) ppm Start End Miss Ions Peptide
842.5642 841.5569 841.5637 -8.05 41 - 47 1 --- K.KVIEIIK.E
1193.6977 1192.6904 1192.6815 7.46 30 - 40 1 --- K.LVAISANKSYK.K
1320.6798 1319.6725 1319.7119 -29.82 207 - 218 1 --- R.KISIDSATLMNK.G
1329.7326 1328.7254 1328.7299 -3.44 113 - 125 1 --- K.AIESGKDIALANK.E
1343.7777 1342.7704 1342.8224 -38.72 42 - 52 1 --- K.VIEIIEKFKPK.Y
1357.7890 1356.7817 1356.7864 -3.46 126 - 138 0 --- K.ETLVVAGELVISK.A
1716.9715 1715.9642 1715.9206 25.4 166 - 181 1 --- K.EEVKNIIVTASGGPFR.G
1852.0436 1851.0364 1850.9713 35.2 238 - 253 0 --- K.VVVHPQSIHVSMVEYK.D
2083.1533 2082.1461 2082.1936 -22.83 119 - 138 1 --- K.DIALANKETLVVAGELVISK.A
2128.1603 2127.1531 2127.1398 6.23 318 - 338 0 --- K.GGVMPAILNGANEVAVDLFLK.G
2329.2726 2328.2653 2328.2511 6.10 318 - 340 1 --- K.GGVMPAILNGANEVAVDLFLK.G.I + Oxidation (M)
3312.3559 3311.3486 3311.6353 -86.54 238 - 267 1 --- K.VVVHPQSIHVSMVEYKDGSVIAQMATPDMK.L + Oxidation (M)
No match to: 720.3201, 721.3315, 724.3214, 804.3108, 865.5456, 870.5940, 881.3242, 969.5548, 973.5948, 982.5138, 1033.5958, 1037.6072, 1045.6282, 1047.6804, 1064.6488, 1072.6447, 1077.2496, 1082.6362, 1093.6181, 1107.6212, 1109.5910, 1118.5838, 1140.6515, 1153.6950, 1163.6855, 1164.6754, 1165.6684, 1179.6771, 1184.6858, 1193.6977, 1201.7343, 1229.8974, 1232.6901, 1253.7005, 1259.2801, 1259.7540, 1263.2247, 1263.7024, 1266.7035, 1277.7589, 1280.7521, 1283.7721, 1302.8009, 1306.7653, 1308.7528, 1310.3027, 1323.2817, 1323.7637, 1324.7890, 1326.3207, 1332.7618, 1340.7775, 1365.7525, 1373.7532, 1390.8324, 1393.8069, 1407.7954, 1422.8033, 1434.8643, 1460.8550, 1475.8557, 1490.8367, 1493.8451, 1549.8969, 1598.9377, 1638.9642, 1657.9317, 1684.0126, 1699.9639, 1707.9051, 1740.9356, 1781.0033, 1789.0003, 1791.8887, 1804.0297, 1839.0630, 1847.0491, 1983.1414, 1989.1250, 2001.0988, 2211.2706, 2215.3315, 2286.2807, 2299.3189, 2343.2471, 2384.1325, 2399.2011, 2441.2881, 2501.4182, 2510.3224, 2705.3310, 2717.2530, 2848.5165, 2869.5420, 3223.3745, 3264.5742

13. ERA\_LACH4 Mass: 34027 Score: 54 Expect: 1.2 Matches: 7
GTPase Era OS=Lactobacillus helveticus (strain DPC 4571) OX=405566 GN=era PE=3 SV=1
Observed Mr(expt) Mr(calc) ppm Start End Miss Ions Peptide
842.5642 841.5569 841.5385 21.8 242 - 250 1 --- K.GIIIGKGGK.M
1195.6893 1194.6821 1194.6608 17.8 261 - 270 1 --- R.KEIEHLLGEK.V
1232.6901 1231.6828 1231.6635 15.7 133 - 142 0 --- K.LLLIMDSYHK.L
1253.7005 1252.6932 1252.6485 35.7 22 - 32 0 --- K.STLMNLYVQK.V
1365.7525 1364.7453 1364.7466 -0.95 275 - 284 1 --- R.LWVKVQHNWR.S
1490.8367 1489.8294 1489.8140 10.3 103 - 115 1 --- K.GDQYIANLLKVEK.V
1549.8969 1548.8896 1548.8624 17.6 262 - 274 1 28 K.EIEHLLGEKVNLR.L
No match to: 720.3201, 721.3315, 724.3214, 804.3108, 865.5456, 870.5940, 881.3242, 969.5548, 973.5948, 982.5138, 1033.5958, 1037.6072, 1045.6282, 1047.6804, 1064.6488, 1072.6447, 1077.2496, 1082.6362, 1093.6181, 1107.6212, 1109.5910, 1118.5838, 1140.6515, 1153.6950, 1163.6855, 1164.6754, 1165.6684, 1179.6771, 1184.6858, 1193.6977, 1201.7343, 1229.8974, 1232.6901, 1253.7005, 1259.2801, 1259.7540, 1263.2247, 1263.7024, 1266.7035, 1277.7589, 1280.7521, 1283.7721, 1302.8009, 1306.7653, 1308.7528, 1310.3027, 1323.2817, 1323.7637, 1324.7890, 1326.3207, 1329.7326, 1332.7618, 1340.7775, 1343.7777, 1357.7890, 1373.7532, 1390.8324, 1393.8069, 1407.7954, 1422.8033, 1434.8643, 1460.8550, 1475.8557, 1493.8451, 1598.9377, 1638.9642, 1657.9317, 1684.0126, 1699.9639, 1707.9051, 1716.9715, 1740.9356, 1781.0033, 1789.0003, 1791.8887, 1804.0297, 1839.0630, 1847.0491, 1852.0436, 1983.1414, 1989.1250, 2001.0988, 2083.1533, 2128.1603, 2211.2706, 2215.3315, 2286.2807, 2299.3189, 2343.2471, 2384.1325, 2399.2011, 2441.2881, 2501.4182, 2510.3224, 2705.3310, 2717.2530, 2848.5165, 2869.5420, 3223.3745, 3264.5742, 3312.3559

14. ASSY\_SOLUE Mass: 50458 Score: 54 Expect: 1.4 Matches: 11
Argininosuccinate synthase OS=Solibacter usitatus (strain Ellin6076) OX=234267 GN=argG PE=3 SV=1
Observed Mr(expt) Mr(calc) ppm Start End Miss Ions Peptide
1153.6950 1152.6877 1152.6139 64.0 206 - 215 1 --- K.DLEHLDKGVK.I
1253.7005 1252.6932 1252.6775 12.5 2 - 13 0 --- M.GNILQNLPAGEK.V
1266.7035 1265.6962 1265.6723 18.9 108 - 119 0 --- R.AVTGTMVLVIAMK.E + 2 Oxidation (M)
1324.7890 1323.7817 1323.6531 97.2 271 - 282 0 --- R.HGLGVSDQIENR.R
1343.7777 1342.7704 1342.7569 10.1 355 - 366 1 --- R.AITGEVTVELRR.G
1357.7890 1356.7817 1356.7224 43.7 216 - 227 0 --- K.IVEPIMGVSWR.E
1373.7532 1372.7459 1372.7173 20.8 216 - 227 0 --- K.IVEPIMGVSWR.E + Oxidation (M)
1657.9317 1656.9244 1656.9021 13.4 213 - 227 1 --- K.GVKIVEPIMGVSWR.E + Oxidation (M)
1699.9639 1698.9566 1698.9417 8.76 351 - 365 1 --- R.WVARAITGEVTVELR.R
1989.1250 1988.1177 1987.9938 62.3 14 - 32 0 10 K.VGLAFSGGLDTSAAIHWMR.A
3223.3745 3222.3672 3222.6608 -91.10 2 - 32 1 --- M.GNILQNLPAGEKVLAFSGGLDTSAAIHWMR.A
No match to: 720.3201, 721.3315, 724.3214, 804.3108, 842.5642, 865.5456, 870.5940, 881.3242, 969.5548, 973.5948, 982.5138, 1033.5958, 1037.6072, 1045.6282, 1047.6804, 1064.6488, 1072.6447, 1077.2496, 1082.6362, 1093.6181, 1107.6212, 1109.5910, 1118.5838, 1140.6515, 1153.6950, 1163.6855, 1164.6754, 1165.6684, 1179.6771, 1184.6858, 1193.6977, 1195.6893, 1201.7343, 1229.8974, 1232.6901, 1253.7005, 1259.2801, 1259.7540, 1263.2247, 1263.7024, 1266.7035, 1277.7589, 1280.7521, 1283.7721, 1302.8009, 1306.7653, 1308.7528, 1310.3027, 1320.6798, 1323.2817, 1323.7637, 1323.7637, 1326.3207, 1329.7326, 1332.7618, 1340.7775, 1365.7525, 1390.8324, 1393.8069, 1407.7954, 1422.8033, 1434.8643, 1460.8550, 1475.8557, 1490.8367, 1493.8451, 1549.8969, 1598.9377, 1638.9642, 1684.0126, 1707.9051, 1716.9715, 1740.9356, 1781.0033, 1789.0003, 1791.8887, 1804.0297, 1839.0630, 1847.0491, 1852.0436, 1983.1414, 1989.1250, 2001.0988, 2083.1533, 2128.1603, 2211.2706, 2215.3315, 2286.2807, 2299.3189, 2329.2726, 2343.2471, 2384.1325, 2399.2011, 2441.2881, 2501.4182, 2510.3224, 2705.3310, 2717.2530, 2848.5165, 2869.5420, 3264.5742, 3312.3559

15. IOLG\_RUBXD Mass: 37446 Score: 54 Expect: 1.5 Matches: 5
Inositol 2-dehydrogenase OS=Rubrobacter xylanophilus (strain DSM 9941 / NBRC 16129) OX=266117 GN=iolG PE=3 SV=1
Observed Mr(expt) Mr(calc) ppm Start End Miss Ions Peptide
1072.6447 1071.6374 1071.5924 42.0 35 - 44 0 --- R.LVAVADLDTR.R
1093.6181 1092.6108 1092.6114 -0.50 122 - 130 1 --- R.KLVQVGFMR.R + Oxidation (M)
1393.8069 1392.7996 1392.8089 -6.69 249 - 262 0 --- R.GTVQVPLPSGAIVR.R
1549.8969 1548.8896 1548.9100 -13.16 249 - 263 1 38 R.GTVQVPLPSGAIVR.R
1740.9356 1739.9283 1739.8406 50.4 186 - 198 0 --- R.WFIEEIEEVYVR.G
No match to: 720.3201, 721.3315, 724.3214, 804.3108, 842.5642, 865.5456, 870.5940, 881.3242, 969.5548, 973.5948, 982.5138, 1033.5958, 1037.6072, 1045.6282, 1047.6804, 1064.6488, 1072.6447, 1077.2496, 1082.6362, 1107.6212, 1109.5910, 1118.5838, 1140.6515, 1153.6950, 1163.6855, 1164.6754, 1165.6684, 1179.6771, 1184.6858, 1193.6977, 1195.6893, 1201.7343, 1229.8974, 1232.6901, 1253.7005, 1259.2801, 1259.7540, 1263.2247, 1263.7024, 1266.7035, 1277.7589, 1280.7521, 1283.7721, 1302.8009, 1306.7653, 1308.7528, 1310.3027, 1320.6798, 1323.2817, 1323.7637, 1324.7890, 1326.3207, 1329.7326, 1332.7618, 1340.7775, 1343.7777, 1357.7890, 1365.7525, 1373.7532, 1390.8324, 1407.7954, 1422.8033, 1434.8643, 1460.8550, 1475.8557, 1490.8367, 1493.8451, 1549.8969, 1598.9377, 1638.9642, 1657.9317, 1684.0126, 1699.9639, 1707.9051, 1716.9715, 1781.0033, 1789.0003, 1791.8887, 1804.0297, 1839.0630, 1847.0491, 1852.0436, 1983.1414, 1989.1250, 2001.0988, 2083.1533, 2128.1603, 2211.2706, 2215.3315, 2286.2807, 2299.3189, 2329.2726, 2343.2471, 2384.1325, 2399.2011, 2441.2881, 2501.4182, 2510.3224, 2705.3310, 2717.2530, 2848.5165, 2869.5420, 3223.3745, 3264.5742, 3312.3559

16. UREG\_RHOPB Mass: 22253 Score: 53 Expect: 1.5 Matches: 6
Urease accessory protein UreG OS=Rhodospseudomonas palustris (strain BisB18) OX=316056 GN=ureG PE=3 SV=1

| Observed                                                                                                                                                                                                                                                                                                                                                                                                                                                                                                                                                                                                                                                                                                                                                                                                                                                                                                                                                                                                                                                                                                                                                                              | Mr (expt) | Mr (calc) | ppm    | Start | End | Miss | Ions | Peptide                                    |
|---------------------------------------------------------------------------------------------------------------------------------------------------------------------------------------------------------------------------------------------------------------------------------------------------------------------------------------------------------------------------------------------------------------------------------------------------------------------------------------------------------------------------------------------------------------------------------------------------------------------------------------------------------------------------------------------------------------------------------------------------------------------------------------------------------------------------------------------------------------------------------------------------------------------------------------------------------------------------------------------------------------------------------------------------------------------------------------------------------------------------------------------------------------------------------------|-----------|-----------|--------|-------|-----|------|------|--------------------------------------------|
| 721.3315                                                                                                                                                                                                                                                                                                                                                                                                                                                                                                                                                                                                                                                                                                                                                                                                                                                                                                                                                                                                                                                                                                                                                                              | 720.3242  | 720.3476  | -32.50 | 166   | -   | 171  | 0    | --- K.MQIDAK.R + Oxidation (M)             |
| 1064.6488                                                                                                                                                                                                                                                                                                                                                                                                                                                                                                                                                                                                                                                                                                                                                                                                                                                                                                                                                                                                                                                                                                                                                                             | 1063.6415 | 1063.5406 | 94.9   | 21    | -   | 29   | 0    | --- K.TALMDLLCK.T                          |
| 1082.6362                                                                                                                                                                                                                                                                                                                                                                                                                                                                                                                                                                                                                                                                                                                                                                                                                                                                                                                                                                                                                                                                                                                                                                             | 1081.6289 | 1081.6244 | 4.19   | 134   | -   | 144  | 1    | --- K.IPSKGGPGITR.S                        |
| 1259.7540                                                                                                                                                                                                                                                                                                                                                                                                                                                                                                                                                                                                                                                                                                                                                                                                                                                                                                                                                                                                                                                                                                                                                                             | 1258.7467 | 1258.7397 | 5.52   | 193   | -   | 204  | 1    | --- R.IVGFIEAKGGLR.A                       |
| 1434.8643                                                                                                                                                                                                                                                                                                                                                                                                                                                                                                                                                                                                                                                                                                                                                                                                                                                                                                                                                                                                                                                                                                                                                                             | 1433.8570 | 1433.7734 | 58.3   | 21    | -   | 32   | 1    | --- K.TALMDLLCKTLR.D                       |
| 1989.1250                                                                                                                                                                                                                                                                                                                                                                                                                                                                                                                                                                                                                                                                                                                                                                                                                                                                                                                                                                                                                                                                                                                                                                             | 1988.1177 | 1988.0435 | 37.3   | 10    | -   | 29   | 1    | 23 R.VGGVGVGSGKTALMDLLCK.T + Oxidation (M) |
| <b>No match to:</b> 720.3201, 724.3214, 804.3108, 842.5642, 865.5456, 870.5940, 881.3242, 969.5548, 973.5948, 982.5138, 1033.5958, 1037.6072, 1045.6282, 1047.6804, 1072.6447, 1077.2496, 1093.6181, 1107.6212, 1109.5910, 1118.5838, 1140.6515, 1153.6950, 1163.6855, 1164.6754, 1165.6684, 1179.6771, 1184.6858, 1193.6977, 1195.6893, 1201.7343, 1229.8974, 1232.6901, 1253.7005, 1259.2801, 1263.2247, 1263.7024, 1266.7035, 1277.7589, 1280.7521, 1283.7721, 1302.8009, 1306.7653, 1308.7528, 1310.3027, 1320.6798, 1323.2817, 1323.7637, 1324.7890, 1326.3207, 1329.7326, 1332.7618, 1340.7775, 1343.7777, 1357.7890, 1365.7525, 1373.7532, 1390.8324, 1393.8069, 1407.7954, 1422.8033, 1460.8550, 1475.8557, 1490.8367, 1493.8451, 1549.8969, 1598.9377, 1638.9642, 1657.9317, 1684.0126, 1699.9639, 1707.9051, 1716.9715, 1740.9356, 1781.0033, 1789.0003, 1791.8887, 1804.0297, 1839.0630, 1847.0491, 1852.0436, 1983.1414, 1989.1250, 2001.0988, 2083.1533, 2128.1603, 2211.2706, 2215.3315, 2286.2807, 2299.3189, 2329.2726, 2343.2471, 2384.1325, 2399.2011, 2441.2881, 2501.4182, 2510.3224, 2705.3310, 2717.2530, 2848.5165, 2869.5420, 3223.3745, 3264.5742, 3312.3559 |           |           |        |       |     |      |      |                                            |
| <b>17. CCPA STAEQ</b> Mass: 36500 Score: 53 Expect: 1.8 Matches: 10                                                                                                                                                                                                                                                                                                                                                                                                                                                                                                                                                                                                                                                                                                                                                                                                                                                                                                                                                                                                                                                                                                                   |           |           |        |       |     |      |      |                                            |
| Catabolite control protein A OS=Staphylococcus epidermidis (strain ATCC 35984 / RP62A) OX=176279 GN=ccpa PE=3 SV=1                                                                                                                                                                                                                                                                                                                                                                                                                                                                                                                                                                                                                                                                                                                                                                                                                                                                                                                                                                                                                                                                    |           |           |        |       |     |      |      |                                            |
| Observed                                                                                                                                                                                                                                                                                                                                                                                                                                                                                                                                                                                                                                                                                                                                                                                                                                                                                                                                                                                                                                                                                                                                                                              | Mr (expt) | Mr (calc) | ppm    | Start | End | Miss | Ions | Peptide                                    |
| 1037.6072                                                                                                                                                                                                                                                                                                                                                                                                                                                                                                                                                                                                                                                                                                                                                                                                                                                                                                                                                                                                                                                                                                                                                                             | 1036.5999 | 1036.5553 | 43.0   | 2     | -   | 10   | 0    | --- M.TVTIYDVAR.E                          |
| 1140.6515                                                                                                                                                                                                                                                                                                                                                                                                                                                                                                                                                                                                                                                                                                                                                                                                                                                                                                                                                                                                                                                                                                                                                                             | 1139.6442 | 1139.5532 | 79.9   | 81    | -   | 90   | 0    | --- R.GLEDIATMYK.Y                         |
| 1184.6858                                                                                                                                                                                                                                                                                                                                                                                                                                                                                                                                                                                                                                                                                                                                                                                                                                                                                                                                                                                                                                                                                                                                                                             | 1183.6785 | 1183.5907 | 74.2   | 1     | -   | 10   | 0    | --- -.MTVTIYDVAR.E + Oxidation (M)         |
| 1329.7326                                                                                                                                                                                                                                                                                                                                                                                                                                                                                                                                                                                                                                                                                                                                                                                                                                                                                                                                                                                                                                                                                                                                                                             | 1328.7254 | 1328.7425 | -12.91 | 43    | -   | 53   | 1    | --- K.RLNYRPNVAR.G                         |
| 1373.7532                                                                                                                                                                                                                                                                                                                                                                                                                                                                                                                                                                                                                                                                                                                                                                                                                                                                                                                                                                                                                                                                                                                                                                             | 1372.7459 | 1372.6623 | 60.9   | 151   | -   | 162  | 0    | --- K.DDHIASVNIIDFK.Q                      |
| 1393.8069                                                                                                                                                                                                                                                                                                                                                                                                                                                                                                                                                                                                                                                                                                                                                                                                                                                                                                                                                                                                                                                                                                                                                                             | 1392.7996 | 1392.7361 | 45.6   | 2     | -   | 13   | 1    | --- M.TVTIYDVAREAR.V                       |
| 1493.8451                                                                                                                                                                                                                                                                                                                                                                                                                                                                                                                                                                                                                                                                                                                                                                                                                                                                                                                                                                                                                                                                                                                                                                             | 1492.8378 | 1492.7409 | 64.9   | 163   | -   | 175  | 0    | --- K.QAAEEATQYLIEK.G                      |
| 2083.1533                                                                                                                                                                                                                                                                                                                                                                                                                                                                                                                                                                                                                                                                                                                                                                                                                                                                                                                                                                                                                                                                                                                                                                             | 2082.1461 | 2081.9840 | 77.8   | 305   | -   | 321  | 0    | --- K.YMNDIEIENPNVILPHR.I                  |
| 2286.2807                                                                                                                                                                                                                                                                                                                                                                                                                                                                                                                                                                                                                                                                                                                                                                                                                                                                                                                                                                                                                                                                                                                                                                             | 2285.2734 | 2285.1910 | 36.1   | 14    | -   | 34   | 1    | --- R.VSMATVSRVNVGNQNVKPETR.N              |
| 2848.5165                                                                                                                                                                                                                                                                                                                                                                                                                                                                                                                                                                                                                                                                                                                                                                                                                                                                                                                                                                                                                                                                                                                                                                             | 2847.5092 | 2847.3926 | 40.9   | 151   | -   | 175  | 1    | --- K.DDHIASVNIIDFKQAAEEATQYLIEK.G         |
| <b>No match to:</b> 720.3201, 721.3315, 724.3214, 804.3108, 842.5642, 865.5456, 870.5940, 881.3242, 969.5548, 973.5948, 982.5138, 1033.5958, 1045.6282, 1047.6804, 1064.6488, 1072.6447, 1077.2496, 1082.6362, 1093.6181, 1107.6212, 1109.5910, 1118.5838, 1153.6950, 1163.6855, 1164.6754, 1165.6684, 1179.6771, 1193.6977, 1195.6893, 1201.7343, 1229.8974, 1232.6901, 1253.7005, 1259.2801, 1263.2247, 1263.7024, 1266.7035, 1277.7589, 1280.7521, 1283.7721, 1302.8009, 1306.7653, 1308.7528, 1310.3027, 1320.6798, 1323.2817, 1323.7637, 1324.7890, 1326.3207, 1332.7618, 1340.7775, 1343.7777, 1357.7890, 1365.7525, 1390.8324, 1407.7954, 1422.8033, 1434.8643, 1460.8550, 1475.8557, 1490.8367, 1493.8451, 1549.8969, 1598.9377, 1638.9642, 1657.9317, 1684.0126, 1699.9639, 1707.9051, 1716.9715, 1740.9356, 1781.0033, 1789.0003, 1791.8887, 1804.0297, 1839.0630, 1847.0491, 1852.0436, 1983.1414, 1989.1250, 2001.0988, 2128.1603, 2211.2706, 2215.3315, 2299.3189, 2329.2726, 2343.2471, 2384.1325, 2399.2011, 2441.2881, 2501.4182, 2510.3224, 2705.3310, 2717.2530, 2869.5420, 3223.3745, 3264.5742, 3312.3559                                                         |           |           |        |       |     |      |      |                                            |
| <b>18. CCPA STAES</b> Mass: 36500 Score: 53 Expect: 1.8 Matches: 10                                                                                                                                                                                                                                                                                                                                                                                                                                                                                                                                                                                                                                                                                                                                                                                                                                                                                                                                                                                                                                                                                                                   |           |           |        |       |     |      |      |                                            |
| Catabolite control protein A OS=Staphylococcus epidermidis (strain ATCC 12228) OX=176280 GN=ccpa PE=3 SV=2                                                                                                                                                                                                                                                                                                                                                                                                                                                                                                                                                                                                                                                                                                                                                                                                                                                                                                                                                                                                                                                                            |           |           |        |       |     |      |      |                                            |
| Observed                                                                                                                                                                                                                                                                                                                                                                                                                                                                                                                                                                                                                                                                                                                                                                                                                                                                                                                                                                                                                                                                                                                                                                              | Mr (expt) | Mr (calc) | ppm    | Start | End | Miss | Ions | Peptide                                    |
| 1037.6072                                                                                                                                                                                                                                                                                                                                                                                                                                                                                                                                                                                                                                                                                                                                                                                                                                                                                                                                                                                                                                                                                                                                                                             | 1036.5999 | 1036.5553 | 43.0   | 2     | -   | 10   | 0    | --- M.TVTIYDVAR.E                          |
| 1140.6515                                                                                                                                                                                                                                                                                                                                                                                                                                                                                                                                                                                                                                                                                                                                                                                                                                                                                                                                                                                                                                                                                                                                                                             | 1139.6442 | 1139.5532 | 79.9   | 81    | -   | 90   | 0    | --- R.GLEDIATMYK.Y                         |
| 1184.6858                                                                                                                                                                                                                                                                                                                                                                                                                                                                                                                                                                                                                                                                                                                                                                                                                                                                                                                                                                                                                                                                                                                                                                             | 1183.6785 | 1183.5907 | 74.2   | 1     | -   | 10   | 0    | --- -.MTVTIYDVAR.E + Oxidation (M)         |
| 1329.7326                                                                                                                                                                                                                                                                                                                                                                                                                                                                                                                                                                                                                                                                                                                                                                                                                                                                                                                                                                                                                                                                                                                                                                             | 1328.7254 | 1328.7425 | -12.91 | 43    | -   | 53   | 1    | --- K.RLNYRPNVAR.G                         |
| 1373.7532                                                                                                                                                                                                                                                                                                                                                                                                                                                                                                                                                                                                                                                                                                                                                                                                                                                                                                                                                                                                                                                                                                                                                                             | 1372.7459 | 1372.6623 | 60.9   | 151   | -   | 162  | 0    | --- K.DDHIASVNIIDFK.Q                      |
| 1393.8069                                                                                                                                                                                                                                                                                                                                                                                                                                                                                                                                                                                                                                                                                                                                                                                                                                                                                                                                                                                                                                                                                                                                                                             | 1392.7996 | 1392.7361 | 45.6   | 2     | -   | 13   | 1    | --- M.TVTIYDVAREAR.V                       |
| 1493.8451                                                                                                                                                                                                                                                                                                                                                                                                                                                                                                                                                                                                                                                                                                                                                                                                                                                                                                                                                                                                                                                                                                                                                                             | 1492.8378 | 1492.7409 | 64.9   | 163   | -   | 175  | 0    | --- K.QAAEEATQYLIEK.G                      |
| 2083.1533                                                                                                                                                                                                                                                                                                                                                                                                                                                                                                                                                                                                                                                                                                                                                                                                                                                                                                                                                                                                                                                                                                                                                                             | 2082.1461 | 2081.9840 | 77.8   | 305   | -   | 321  | 0    | --- K.YMNDIEIENPNVILPHR.I                  |
| 2286.2807                                                                                                                                                                                                                                                                                                                                                                                                                                                                                                                                                                                                                                                                                                                                                                                                                                                                                                                                                                                                                                                                                                                                                                             | 2285.2734 | 2285.1910 | 36.1   | 14    | -   | 34   | 1    | --- R.VSMATVSRVNVGNQNVKPETR.N              |
| 2848.5165                                                                                                                                                                                                                                                                                                                                                                                                                                                                                                                                                                                                                                                                                                                                                                                                                                                                                                                                                                                                                                                                                                                                                                             | 2847.5092 | 2847.3926 | 40.9   | 151   | -   | 175  | 1    | --- K.DDHIASVNIIDFKQAAEEATQYLIEK.G         |
| <b>No match to:</b> 720.3201, 721.3315, 724.3214, 804.3108, 842.5642, 865.5456, 870.5940, 881.3242, 969.5548, 973.5948, 982.5138, 1033.5958, 1045.6282, 1047.6804, 1064.6488, 1072.6447, 1077.2496, 1082.6362, 1093.6181, 1107.6212, 1109.5910, 1118.5838, 1153.6950, 1163.6855, 1164.6754, 1165.6684, 1179.6771, 1193.6977, 1195.6893, 1201.7343, 1229.8974, 1232.6901, 1253.7005, 1259.2801, 1263.2247, 1263.7024, 1266.7035, 1277.7589, 1280.7521, 1283.7721, 1302.8009, 1306.7653, 1308.7528, 1310.3027, 1320.6798, 1323.2817, 1323.7637, 1324.7890, 1326.3207, 1332.7618, 1340.7775, 1343.7777, 1357.7890, 1365.7525, 1390.8324, 1407.7954, 1422.8033, 1434.8643, 1460.8550, 1475.8557, 1490.8367, 1493.8451, 1549.8969, 1598.9377, 1638.9642, 1657.9317, 1684.0126, 1699.9639, 1707.9051, 1716.9715, 1740.9356, 1781.0033, 1789.0003, 1791.8887, 1804.0297, 1839.0630, 1847.0491, 1852.0436, 1983.1414, 1989.1250, 2001.0988, 2128.1603, 2211.2706, 2215.3315, 2299.3189, 2329.2726, 2343.2471, 2384.1325, 2399.2011, 2441.2881, 2501.4182, 2510.3224, 2705.3310, 2717.2530, 2869.5420, 3223.3745, 3264.5742, 3312.3559                                                         |           |           |        |       |     |      |      |                                            |
| <b>19. ACKA PORG3</b> Mass: 43586 Score: 52 Expect: 2 Matches: 10                                                                                                                                                                                                                                                                                                                                                                                                                                                                                                                                                                                                                                                                                                                                                                                                                                                                                                                                                                                                                                                                                                                     |           |           |        |       |     |      |      |                                            |
| Acetate kinase OS=Porphyromonas gingivalis (strain ATCC 33277 / DSM 20709 / CIP 103683 / JCM 12257 / NCTC 11834 / 2561) OX=43194                                                                                                                                                                                                                                                                                                                                                                                                                                                                                                                                                                                                                                                                                                                                                                                                                                                                                                                                                                                                                                                      |           |           |        |       |     |      |      |                                            |
| Observed                                                                                                                                                                                                                                                                                                                                                                                                                                                                                                                                                                                                                                                                                                                                                                                                                                                                                                                                                                                                                                                                                                                                                                              | Mr (expt) | Mr (calc) | ppm    | Start | End | Miss | Ions | Peptide                                    |
| 721.3315                                                                                                                                                                                                                                                                                                                                                                                                                                                                                                                                                                                                                                                                                                                                                                                                                                                                                                                                                                                                                                                                                                                                                                              | 720.3242  | 720.3225  | 2.41   | 358   | -   | 363  | 0    | --- K.VNEGMR.G + Oxidation (M)             |
| 1037.6072                                                                                                                                                                                                                                                                                                                                                                                                                                                                                                                                                                                                                                                                                                                                                                                                                                                                                                                                                                                                                                                                                                                                                                             | 1036.5999 | 1036.5627 | 35.9   | 15    | -   | 22   | 1    | --- K.YKLEMPK.G + Oxidation (M)            |
| 1072.6447                                                                                                                                                                                                                                                                                                                                                                                                                                                                                                                                                                                                                                                                                                                                                                                                                                                                                                                                                                                                                                                                                                                                                                             | 1071.6374 | 1071.5560 | 75.9   | 23    | -   | 33   | 0    | --- K.GDVLQAQGGVEK.L                       |
| 1163.6855                                                                                                                                                                                                                                                                                                                                                                                                                                                                                                                                                                                                                                                                                                                                                                                                                                                                                                                                                                                                                                                                                                                                                                             | 1162.6783 | 1162.5903 | 75.6   | 366   | -   | 375  | 0    | --- K.EMVISKPEK.V + Oxidation (M)          |
| 1332.7618                                                                                                                                                                                                                                                                                                                                                                                                                                                                                                                                                                                                                                                                                                                                                                                                                                                                                                                                                                                                                                                                                                                                                                             | 1331.7545 | 1331.7119 | 32.0   | 364   | -   | 375  | 1    | --- R.GKEMVISKPEK.V                        |
| 1390.8324                                                                                                                                                                                                                                                                                                                                                                                                                                                                                                                                                                                                                                                                                                                                                                                                                                                                                                                                                                                                                                                                                                                                                                             | 1389.8251 | 1389.7650 | 43.3   | 2     | -   | 14   | 1    | --- M.KVLVLNCGSSSVK.Y                      |
| 1460.8550                                                                                                                                                                                                                                                                                                                                                                                                                                                                                                                                                                                                                                                                                                                                                                                                                                                                                                                                                                                                                                                                                                                                                                             | 1459.8477 | 1459.7995 | 33.0   | 271   | -   | 285  | 1    | --- K.KSGVLGSGVSSDLR.E                     |
| 1549.8969                                                                                                                                                                                                                                                                                                                                                                                                                                                                                                                                                                                                                                                                                                                                                                                                                                                                                                                                                                                                                                                                                                                                                                             | 1548.8896 | 1548.8987 | -5.88  | 204   | -   | 219  | 0    | 14 R.IITAHIGNGASIAAIK.N                    |
| 2510.3224                                                                                                                                                                                                                                                                                                                                                                                                                                                                                                                                                                                                                                                                                                                                                                                                                                                                                                                                                                                                                                                                                                                                                                             | 2509.3151 | 2509.3866 | -28.49 | 51    | -   | 72   | 1    | --- K.VVLEKDMPEHTIAVEFILLSVLK.D            |
| 3223.3745                                                                                                                                                                                                                                                                                                                                                                                                                                                                                                                                                                                                                                                                                                                                                                                                                                                                                                                                                                                                                                                                                                                                                                             | 3222.3672 | 3222.5656 | -61.56 | 312   | -   | 342  | 1    | --- K.YVGAYAAAMGVDVLFVTGGVGENQYTTREK.V     |
| <b>No match to:</b> 720.3201, 724.3214, 804.3108, 842.5642, 865.5456, 870.5940, 881.3242, 969.5548, 973.5948, 982.5138, 1033.5958, 1045.6282, 1047.6804, 1064.6488, 1072.6447, 1077.2496, 1082.6362, 1093.6181, 1107.6212, 1109.5910, 1118.5838, 1140.6515, 1153.6950, 1163.6855, 1164.6754, 1165.6684, 1179.6771, 1184.6858, 1193.6977, 1195.6893, 1201.7343, 1229.8974, 1232.6901, 1253.7005, 1259.2801, 1263.2247, 1263.7024, 1266.7035, 1277.7589, 1280.7521, 1283.7721, 1302.8009, 1306.7653, 1308.7528, 1310.3027, 1320.6798, 1323.2817, 1323.7637, 1324.7890, 1326.3207, 1329.7326, 1340.7775, 1343.7777, 1357.7890, 1365.7525, 1373.7532, 1393.8069, 1407.7954, 1422.8033, 1434.8643, 1460.8550, 1475.8557, 1490.8367, 1493.8451, 1549.8969, 1598.9377, 1638.9642, 1657.9317, 1684.0126, 1699.9639, 1707.9051, 1716.9715, 1740.9356, 1781.0033, 1789.0003, 1791.8887, 1804.0297, 1839.0630, 1847.0491, 1852.0436, 1983.1414, 1989.1250, 2001.0988, 2083.1533, 2128.1603, 2211.2706, 2215.3315, 2286.2807, 2299.3189, 2329.2726, 2343.2471, 2384.1325, 2399.2011, 2441.2881, 2501.4182, 2705.3310, 2717.2530, 2848.5165, 2869.5420, 3223.3745, 3264.5742, 3312.3559            |           |           |        |       |     |      |      |                                            |
| <b>20. RPOC PSYCK</b> Mass: 155806 Score: 52 Expect: 2.1 Matches: 15                                                                                                                                                                                                                                                                                                                                                                                                                                                                                                                                                                                                                                                                                                                                                                                                                                                                                                                                                                                                                                                                                                                  |           |           |        |       |     |      |      |                                            |
| DNA-directed RNA polymerase subunit beta' OS=Psychrobacter cryohalolentis (strain K5) OX=335284 GN=rpoc PE=3 SV=1                                                                                                                                                                                                                                                                                                                                                                                                                                                                                                                                                                                                                                                                                                                                                                                                                                                                                                                                                                                                                                                                     |           |           |        |       |     |      |      |                                            |
| Observed                                                                                                                                                                                                                                                                                                                                                                                                                                                                                                                                                                                                                                                                                                                                                                                                                                                                                                                                                                                                                                                                                                                                                                              | Mr (expt) | Mr (calc) | ppm    | Start | End | Miss | Ions | Peptide                                    |
| 982.5138                                                                                                                                                                                                                                                                                                                                                                                                                                                                                                                                                                                                                                                                                                                                                                                                                                                                                                                                                                                                                                                                                                                                                                              | 981.5065  | 981.4879  | 18.9   | 785   | -   | 793  | 0    | --- K.TANSGLYLR.R                          |
| 1109.5910                                                                                                                                                                                                                                                                                                                                                                                                                                                                                                                                                                                                                                                                                                                                                                                                                                                                                                                                                                                                                                                                                                                                                                             | 1108.5837 | 1108.4893 | 85.2   | 691   | -   | 700  | 0    | --- K.AMMDNLATDK.I                         |
| 1153.6950                                                                                                                                                                                                                                                                                                                                                                                                                                                                                                                                                                                                                                                                                                                                                                                                                                                                                                                                                                                                                                                                                                                                                                             | 1152.6877 | 1152.6866 | 0.89   | 380   | -   | 390  | 0    | --- K.LLSHGLATTK.A                         |
| 1184.6858                                                                                                                                                                                                                                                                                                                                                                                                                                                                                                                                                                                                                                                                                                                                                                                                                                                                                                                                                                                                                                                                                                                                                                             | 1183.6785 | 1183.7037 | -21.28 | 310   | -   | 320  | 1    | --- R.AITGSNKRPLK.S                        |
| 1201.7343                                                                                                                                                                                                                                                                                                                                                                                                                                                                                                                                                                                                                                                                                                                                                                                                                                                                                                                                                                                                                                                                                                                                                                             | 1200.7270 | 1200.6350 | 76.7   | 1273  | -   | 1283 | 1    | --- K.ALNAKLEAEDK.F                        |

```

1283.7721 1282.7648 1282.7721 -5.71 830 - 841 1 --- K.LGELVLGRVTR.D
1332.7618 1331.7545 1331.6834 53.4 677 - 687 1 --- K.VVDIWSRTNDK.V
1407.7954 1406.7882 1406.8180 -21.21 1238 - 1248 1 --- K.HIEVIIRQMLR.K
1549.8969 1548.8896 1548.8552 22.3 1083 - 1095 0 16 K.EVVYFLPAETIIR.V
1657.9317 1656.9244 1656.9232 0.71 119 - 132 1 --- R.IGLLLDMLTRDIER.V
1684.0126 1683.0054 1682.8952 65.5 1111 - 1127 1 --- R.VPQASSGKBITGGGLPR.V
1716.9715 1715.9642 1715.8624 59.3 293 - 307 1 --- R.MLQESVDALDNGRR.G
1791.8887 1790.8814 1790.9315 -28.00 760 - 775 0 15 R.EGLTVLQYFISTHGAR.K
2083.1533 2082.1461 2081.9762 81.6 1139 - 1157 1 --- K.DHAIMAEMTGVVSPGKTK.G + 2 Oxidation (M)
2705.3310 2704.3238 2704.1893 49.7 572 - 593 0 --- R.LLIWNIMPVGMSPFDECNEMTK.K + 3 Oxidation (M)
No match to: 720.3201, 721.3315, 724.3214, 804.3108, 842.5642, 865.5456, 870.5940, 881.3242, 969.5548, 973.5948, 1033.5958,
1037.6072, 1045.6282, 1047.6804, 1064.6488, 1072.6447, 1077.2496, 1082.6362, 1093.6181, 1107.6212, 1118.5838, 1140.6515,
1163.6855, 1164.6754, 1165.6684, 1179.6771, 1193.6977, 1195.6893, 1229.8974, 1232.6901, 1253.7005, 1259.2801, 1259.7540,
1263.2247, 1263.7024, 1266.7035, 1277.7589, 1280.7521, 1302.8009, 1306.7653, 1308.7528, 1310.3027, 1320.6798, 1323.2817,
1323.7637, 1324.7890, 1326.3207, 1329.7326, 1340.7775, 1343.7777, 1357.7890, 1365.7525, 1373.7532, 1390.8324, 1393.8069,
1422.8033, 1434.8643, 1460.8550, 1475.8557, 1490.8367, 1493.8451, 1598.9377, 1638.9642, 1699.9639, 1707.9051, 1740.9356,
1781.0033, 1789.0003, 1804.0297, 1839.0630, 1847.0491, 1852.0436, 1983.1414, 1989.1250, 2001.0988, 2128.1603, 2211.2706,
2215.3315, 2286.2807, 2299.3189, 2329.2726, 2343.2471, 2384.1325, 2399.2011, 2441.2881, 2501.4182, 2510.3224, 2717.2530,
2848.5165, 2869.5420, 3223.3745, 3264.5742, 3312.3559

```

## Search Parameters

```

Type of search      : MS/MS Ion Search
Enzyme              : Trypsin
Fixed modifications : Carbamidomethyl (C)
Variable modifications : Oxidation (M)
Mass values        : Monoisotopic
Protein Mass       : Unrestricted
Peptide Mass Tolerance : ± 100 ppm
Fragment Mass Tolerance : ± 2 Da
Max Missed Cleavages : 1
Instrument type     : MALDI-TOF-TOF
Query1 (720.3201,1+) : <no title>
Query2 (721.3315,1+) : <no title>
Query3 (724.3214,1+) : <no title>
Query4 (804.3108,1+) : <no title>
Query5 (842.5642,1+) : <no title>
Query6 (865.5456,1+) : <no title>
Query7 (870.5940,1+) : <no title>
Query8 (881.3242,1+) : <no title>
Query9 (969.5548,1+) : <no title>
Query10 (973.5948,1+) : <no title>
Query11 (982.5138,1+) : <no title>
Query12 (1033.5958,1+) : <no title>
Query13 (1037.6072,1+) : <no title>
Query14 (1045.6282,1+) : <no title>
Query15 (1047.6804,1+) : <no title>
Query16 (1064.6488,1+) : <no title>
Query17 (1072.6447,1+) : <no title>
Query18 (1077.2496,1+) : <no title>
Query19 (1082.6362,1+) : <no title>
Query20 (1093.6181,1+) : <no title>
Query21 (1107.6212,1+) : <no title>
Query22 (1109.5910,1+) : <no title>
Query23 (1118.5838,1+) : <no title>
Query24 (1140.6515,1+) : <no title>
Query25 (1153.6950,1+) : <no title>
Query26 (1163.6855,1+) : <no title>
Query27 (1164.6754,1+) : <no title>
Query28 (1165.6684,1+) : <no title>
Query29 (1179.6771,1+) : <no title>
Query30 (1184.6858,1+) : <no title>
Query31 (1193.6977,1+) : <no title>
Query32 (1195.6893,1+) : <no title>
Query33 (1201.7343,1+) : <no title>
Query34 (1229.8974,1+) : <no title>
Query35 (1232.6901,1+) : <no title>
Query36 (1253.7005,1+) : <no title>
Query37 (1259.2801,1+) : <no title>
Query38 (1259.7540,1+) : <no title>
Query39 (1263.2247,1+) : <no title>
Query40 (1263.7024,1+) : <no title>
Query41 (1266.7035,1+) : <no title>
Query42 (1277.7589,1+) : <no title>
Query43 (1280.7521,1+) : <no title>
Query44 (1283.7721,1+) : <no title>
Query45 (1302.8009,1+) : <no title>
Query46 (1306.7653,1+) : <no title>
Query47 (1308.7528,1+) : <no title>
Query48 (1310.3027,1+) : <no title>
Query49 (1320.6798,1+) : <no title>
Query50 (1323.2817,1+) : <no title>
Query51 (1323.7637,1+) : <no title>
Query52 (1324.7890,1+) : <no title>
Query53 (1326.3207,1+) : <no title>
Query54 (1329.7326,1+) : <no title>
Query55 (1332.7618,1+) : <no title>
Query56 (1340.7775,1+) : <no title>
Query57 (1343.7777,1+) : <no title>
Query58 (1357.7890,1+) : <no title>
Query59 (1365.7525,1+) : <no title>
Query60 (1373.7532,1+) : <no title>
Query61 (1390.8324,1+) : <no title>
Query62 (1393.8069,1+) : <no title>
Query63 (1407.7954,1+) : <no title>
Query64 (1422.8033,1+) : <no title>
Query65 (1434.8643,1+) : <no title>
Query66 (1460.8550,1+) : <no title>
Query67 (1475.8557,1+) : <no title>
Query68 (1490.8367,1+) : <no title>
Query69 (1493.8451,1+) : <no title>
Query70 (1549.8969,1+) : <no title>
Query71 (1598.9377,1+) : <no title>

```



Query72 (1638.9642,1+) : <no title>  
Query73 (1657.9317,1+) : <no title>  
Query74 (1684.0126,1+) : <no title>  
Query75 (1699.9639,1+) : <no title>  
Query76 (1707.9051,1+) : <no title>  
Query77 (1716.9715,1+) : <no title>  
Query78 (1740.9356,1+) : <no title>  
Query79 (1781.0033,1+) : <no title>  
Query80 (1789.0003,1+) : <no title>  
Query81 (1791.8887,1+) : <no title>  
Query82 (1804.0297,1+) : <no title>  
Query83 (1839.0630,1+) : <no title>  
Query84 (1847.0491,1+) : <no title>  
Query85 (1852.0436,1+) : <no title>  
Query86 (1983.1414,1+) : <no title>  
Query87 (1989.1250,1+) : <no title>  
Query88 (2001.0988,1+) : <no title>  
Query89 (2083.1533,1+) : <no title>  
Query90 (2128.1603,1+) : <no title>  
Query91 (2211.2706,1+) : <no title>  
Query92 (2215.3315,1+) : <no title>  
Query93 (2286.2807,1+) : <no title>  
Query94 (2299.3189,1+) : <no title>  
Query95 (2329.2726,1+) : <no title>  
Query96 (2343.2471,1+) : <no title>  
Query97 (2384.1325,1+) : <no title>  
Query98 (2399.2011,1+) : <no title>  
Query99 (2441.2881,1+) : <no title>  
Query100 (2501.4182,1+) : <no title>  
Query101 (2510.3224,1+) : <no title>  
Query102 (2705.3310,1+) : <no title>  
Query103 (2717.2530,1+) : <no title>  
Query104 (2848.5165,1+) : <no title>  
Query105 (2869.5420,1+) : <no title>  
Query106 (3223.3745,1+) : <no title>  
Query107 (3264.5742,1+) : <no title>  
Query108 (3312.3559,1+) : <no title>

Mascot: <http://www.matrixscience.com/>

[Supplementary Data 1.pdf](#)

[Supplementary Data 2.pdf](#)

[Supplementary Data 3.pdf](#)

[Supplementary Data 4.pdf](#)

[Supplementary Data 5.pdf](#)

[Supplementary Data 6.pdf](#)

[Supplementary Data 7.pdf](#)

[Supplementary Data 8.pdf](#)

[Supplementary data 9.pdf](#)

### Supplementary Data 1: Effect of Growth Medium

| Isolates | Absorbance<br>in BHI broth | Absorbance<br>in LB broth | Isolates | Absorbance<br>in BHI broth | Absorbance<br>in LB broth |
|----------|----------------------------|---------------------------|----------|----------------------------|---------------------------|
|          |                            |                           | 14122    | 0.3723                     | 0.371                     |
|          |                            |                           | 4079     | 0.3728                     | 0.374                     |
| 222      | 0.145                      | 0.141                     | 2989     | 0.373                      | 0.371                     |
| 989      | 0.164                      | 0.165                     | 5993     | 0.374                      | 0.3728                    |
| 1606     | 0.173                      | 0.171                     | 15311    | 0.3818                     | 0.38                      |
| 1249     | 0.186                      | 0.188                     | 4008     | 0.392                      | 0.393                     |
| 997      | 0.198                      | 0.195                     | 12       | 0.394                      | 0.391                     |
| 1250     | 0.2                        | 0.197                     | 6122     | 0.399                      | 0.398                     |
| 1929     | 0.201                      | 0.201                     | 4        | 0.4                        | 0.41                      |
| 3179     | 0.2168                     | 0.217                     | 4151     | 0.4105                     | 0.387                     |
| 1252     | 0.221                      | 0.224                     | 11204    | 0.4193                     | 0.396                     |
| 1749     | 0.224                      | 0.218                     | 210      | 0.4208                     | 0.419                     |
| 15288    | 0.236                      | 0.234                     | 1876     | 0.424                      | 0.426                     |
| 2067     | 0.236                      | 0.239                     | 2322     | 0.433                      | 0.433                     |
| 1996     | 0.237                      | 0.237                     | 15255    | 0.4335                     | 0.431                     |
| 1220     | 0.243                      | 0.241                     | 11023    | 0.4373                     | 0.438                     |
| 215      | 0.2458                     | 0.247                     | 2310     | 0.4383                     | 0.436                     |
| 6160     | 0.249                      | 0.248                     | 4073     | 0.4428                     | 0.45                      |
| 216      | 0.2518                     | 0.253                     | 6617     | 0.445                      | 0.441                     |
| 7834     | 0.259                      | 0.255                     | 8547     | 0.455                      | 0.453                     |
| 2276     | 0.2698                     | 0.271                     | 6        | 0.4565                     | 0.457                     |
| 4158     | 0.2715                     | 0.268                     | 7        | 0.4628                     | 0.464                     |
| 8373     | 0.284                      | 0.28                      | 3990     | 0.47                       | 0.463                     |
| 217      | 0.293                      | 0.297                     | 2066     | 0.472                      | 0.47                      |
| 4148     | 0.2963                     | 0.264                     | 3303     | 0.472                      | 0.478                     |
| 7772     | 0.299                      | 0.3                       | 10533    | 0.473                      | 0.477                     |
| 214      | 0.2995                     | 0.297                     | 4272     | 0.4755                     | 0.464                     |
| 3169     | 0.3028                     | 0.3                       | 5        | 0.476                      | 0.443                     |
| 11569    | 0.3048                     | 0.31                      | 1886     | 0.477                      | 0.475                     |
| 1194     | 0.306                      | 0.298                     | 3977     | 0.4843                     | 0.486                     |
| 2232     | 0.314                      | 0.312                     | 2187     | 0.4865                     | 0.486                     |
| 1607     | 0.318                      | 0.316                     | 10697    | 0.487                      | 0.489                     |
| 1287     | 0.319                      | 0.319                     | 209      | 0.4873                     | 0.473                     |
| 2001     | 0.338                      | 0.341                     | 4150     | 0.4913                     | 0.483                     |
| 6211     | 0.348                      | 0.347                     | 3707     | 0.496                      | 0.495                     |
| 191      | 0.348                      | 0.344                     | 1214     | 0.499                      | 0.52                      |
| 1074     | 0.352                      | 0.35                      | 3788     | 0.4998                     | 0.53                      |
| 1931     | 0.353                      | 0.359                     | 192      | 0.501                      | 0.493                     |
| 8678     | 0.357                      | 0.354                     | 7663     | 0.503                      | 0.497                     |
| 8        | 0.367                      | 0.361                     | 1008     | 0.505                      | 0.5                       |
| 213      | 0.3713                     | 0.372                     |          | Absorbance<br>in BHI broth | Absorbance<br>in LB broth |
| Isolates | Absorbance<br>in BHI broth | Absorbance<br>in LB broth | Isolates | 0.511                      | 0.52                      |
|          |                            |                           | 13738    |                            |                           |

### Supplementary Data 1: Effect of Growth Medium

|          |              |             |           |              |             |
|----------|--------------|-------------|-----------|--------------|-------------|
| 4179     | 0.516        | 0.522       | 4067      | 0.7545       | 0.75        |
| 11111    | 0.5238       | 0.514       | 2204/2294 | 0.761        | 0.756       |
| 11095    | 0.539        | 0.527       | 2517      | 0.764        | 0.761       |
| 13328    | 0.548        | 0.545       | 2190      | 0.764        | 0.766       |
| 13409    | 0.5685       | 0.553       | 3811      | 0.7658       | 0.77        |
| 1922(F)  | 0.573        | 0.57        | 11040     | 0.766        | 0.771       |
| 2296     | 0.5735       | 0.572       | 1315      | 0.767        | 0.77        |
| 2263     | 0.574        | 0.575       | 9607      | 0.773        | 0.778       |
| 4066     | 0.5765       | 0.583       | 7877      | 0.775        | 0.771       |
| 6563     | 0.578        | 0.549       | 1         | 0.777        | 0.782       |
| 3906     | 0.58         | 0.574       | 2551      | 0.779        | 0.781       |
| 3357     | 0.5855       | 0.58        | 14730     | 0.8078       | 0.798       |
| 2        | 0.594        | 0.591       | 3022      | 0.8125       | 0.82        |
| 13836    | 0.5985       | 0.605       | 7520      | 0.817        | 0.8         |
| 9        | 0.6003       | 0.6         | 198       | 0.827        | 0.825       |
| 2359     | 0.6068       | 0.61        | 3807      | 0.8315       | 0.831       |
| 1609     | 0.624        | 0.62        | 194       | 0.832        | 0.83        |
| 51       | 0.625        | 0.62        | 3293      | 0.8335       | 0.841       |
| 190      | 0.628        | 0.631       | 2070      | 0.8533       | 0.85        |
| 11109    | 0.6333       | 0.627       | 3         | 0.8568       | 0.849       |
| 1740     | 0.645        | 0.64        | 1882      | 0.862        | 0.857       |
| 1972     | 0.653        | 0.658       | 7327      | 0.862        | 0.86        |
| 3917     | 0.6563       | 0.659       | 12110     | 0.8693       | 0.872       |
| 1583     | 0.664        | 0.66        | 8315      | 0.884        | 0.882       |
| 14514    | 0.6728       | 0.68        | 14842     | 0.8865       | 0.889       |
| 3869     | 0.6803       | 0.678       | 4840      | 0.888        | 0.89        |
| 2965     | 0.6818       | 0.682       | 8301      | 0.9          | 0.9         |
| 2972     | 0.686        | 0.681       | 14696     | 0.9018       | 0.878       |
| 1974     | 0.693        | 0.687       | 8342      | 0.905        | 0.9         |
| 12027    | 0.6938       | 0.69        | 2171      | 0.905        | 0.89        |
| 10       | 0.6968       | 0.692       | 9032      | 0.908        | 0.91        |
| 11600    | 0.7          | 0.693       | 2485      | 0.9193       | 0.93        |
| 4268     | 0.7098       | 0.71        | 14881     | 0.9263       | 0.931       |
| 3294     | 0.712        | 0.688       | 3557      | 0.9313       | 0.937       |
| 200      | 0.714        | 0.692       | 4020      | 0.957        | 0.948       |
| 2822     | 0.716        | 0.694       | 4289      | 0.9628       | 0.971       |
| 193      | 0.722        | 0.703       | 4238      | 0.963        | 0.967       |
| 14310    | 0.7248       | 0.718       | 12998     | 0.9638       | 0.965       |
| 993      | 0.733        | 0.734       |           | Absorbance   | Absorbance  |
|          | Absorbance   | Absorbance  | Isolates  | in BHI broth | in LB broth |
| Isolates | in BHI broth | in LB broth | 3248      | 0.9693       | 0.97        |
| 4182     | 0.738        | 0.736       | 11        | 0.97         | 0.97        |
| 1772     | 0.74         | 0.72        | 10915     | 0.972        | 0.976       |

### Supplementary Data 1: Effect of Growth Medium

|          |              |             |          |              |             |
|----------|--------------|-------------|----------|--------------|-------------|
| 3830     | 0.9758       | 0.975       | 13657    | 1.454        | 1.42        |
| 9517     | 1.005        | 1.02        | 4299     | 1.488        | 1.469       |
| 2717     | 1.012        | 1.06        | 8436     | 1.51         | 1.5         |
| 9972     | 1.026        | 1.003       | 10101    | 1.525        | 1.521       |
| 15724    | 1.042        | 1.009       | 13797    | 1.525        | 1.5         |
| 8571     | 1.058        | 1.01        | 13059    | 1.543        | 1.53        |
| 1318     | 1.085        | 1.049       | 13603    | 1.553        | 1.526       |
| 2825     | 1.091        | 1.1         | 14478    | 1.565        | 1.56        |
| 12084    | 1.119        | 1.06        | 1338     | 1.571        | 1.56        |
| 10046    | 1.143        | 1.13        | 3362     | 1.585        | 1.53        |
| 13423    | 1.147        | 1.136       | 2588     | 1.59         | 1.6         |
| 1313     | 1.156        | 1.12        | 12497    | 1.597        | 1.58        |
| 3160     | 1.156        | 1.2         | 197      | 1.602        | 1.61        |
| 4059     | 1.157        | 1.08        | 2056(PA) | 1.632        | 1.6         |
| 6752     | 1.163        | 1.03        | 13306    | 1.641        | 1.623       |
| 4073     | 1.169        | 1.12        | Sim      | 1.655        | 1.64        |
| 14944    | 1.185        | 1.06        | 14068    | 1.674        | 1.66        |
| 14735    | 1.186        | 1.06        | 1922 R   | 1.675        | 1.69        |
| 2164     | 1.187        | 1.11        | 1240     | 1.682        | 1.67        |
| 2700     | 1.195        | 1.13        | 12566    | 1.693        | 1.69        |
| 10723    | 1.216        | 1.16        | 12617    | 1.752        | 1.67        |
| 3398     | 1.225        | 1.2         | 2187     | 1.756        | 1.78        |
| 1210     | 1.226        | 1.21        | 10872    | 1.757        | 1.71        |
| 212      | 1.24         | 1.22        | 3415     | 1.758        | 1.76        |
| 10825    | 1.25         | 1.19        | 4227     | 1.762        | 1.73        |
| 3724     | 1.269        | 1.25        | 14350    | 1.775        | 1.7         |
| 3652     | 1.279        | 1.27        | 3593     | 1.802        | 1.8         |
| 201      | 1.279        | 1.283       | 3690     | 1.811        | 1.78        |
| 7884     | 1.282        | 1.26        | 2010     | 1.842        | 1.8         |
| 15718    | 1.298        | 1.275       | 14345    | 1.864        | 1.82        |
| 14513    | 1.311        | 1.25        | 13962    | 1.864        | 1.84        |
| 6585     | 1.329        | 1.27        | 10088    | 1.874        | 1.857       |
| 15521    | 1.33         | 1.31        | 14203    | 1.886        | 1.83        |
| 2503     | 1.339        | 1.33        | 6708     | 1.893        | 1.9         |
| 1309     | 1.341        | 1.31        | 10012    | 1.903        | 1.9         |
| 2173     | 1.351        | 1.23        | 2086     | 1.985        | 1.96        |
| 3709     | 1.371        | 1.36        |          | Absorbance   | Absorbance  |
|          | Absorbance   | Absorbance  | Isolates | in BHI broth | in LB broth |
| Isolates | in BHI broth | in LB broth | 15603    | 2.011        | 2           |
| 2498     | 1.392        | 1.399       | 2138     | 2.089        | 2.03        |
| 1834     | 1.398        | 1.39        | 1337     | 2.099        | 2.06        |
| 10807    | 1.408        | 1.41        | 145      | 2.186        | 2.2         |
| 195      | 1.43         | 1.36        | 2895     | 2.254        | 2.21        |

### Supplementary Data 1: Effect of Growth Medium

|       |       |      |       |       |      |
|-------|-------|------|-------|-------|------|
| 12600 | 2.261 | 2.26 | 196   | 2.804 | 2.73 |
| 2196  | 2.333 | 2.3  | 497   | 2.939 | 2.84 |
| 2931  | 2.378 | 2.35 | 1739  | 3.118 | 2.97 |
| 15598 | 2.576 | 2.47 | 2887  | 3.423 | 3.08 |
| 10894 | 2.623 | 2.53 | 10869 | 3.667 | 3.21 |
| 2844  | 2.672 | 2.59 | 3420  | 3.689 | 3.29 |

## Supplementary Data 2: Effect of Incubation Period

| <b>Isolates</b> | <b>6hrs<br/>(OD)</b> | <b>12hrs<br/>(OD)</b> | <b>18hrs<br/>(OD)</b> | <b>24hrs<br/>(OD)</b> |                 | <b>(OD)</b>          | <b>(OD)</b>           | <b>(OD)</b>           | <b>(OD)</b>           |
|-----------------|----------------------|-----------------------|-----------------------|-----------------------|-----------------|----------------------|-----------------------|-----------------------|-----------------------|
| 222             | 0                    | 0.02                  | 0.145                 | 0.147                 | 4079            | 0                    | 0.281                 | 0.3728                | 0.371                 |
| 989             | 0                    | 0.038                 | 0.164                 | 0.16                  | 2989            | 0                    | 0.238                 | 0.373                 | 0.372                 |
| 1606            | 0                    | 0.057                 | 0.173                 | 0.172                 | 5993            | 0                    | 0.342                 | 0.374                 | 0.375                 |
| 1249            | 0                    | 0.071                 | 0.186                 | 0.183                 | 15311           | 0.07                 | 0.277                 | 0.3818                | 0.383                 |
| 997             | 0                    | 0.102                 | 0.198                 | 0.195                 | 4008            | 0                    | 0.252                 | 0.392                 | 0.39                  |
| 1250            | 0                    | 0.105                 | 0.2                   | 0.2                   | 12              | 0                    | 0.286                 | 0.394                 | 0.392                 |
| 1929            | 0                    | 0.109                 | 0.201                 | 0.2                   | 6122            | 0                    | 0.254                 | 0.399                 | 0.396                 |
| 3179            | 0                    | 0.113                 | 0.2168                | 0.2                   | 4               | 0                    | 0.219                 | 0.4                   | 0.399                 |
| 1252            | 0                    | 0.104                 | 0.221                 | 0.21                  | 4151            | 0                    | 0.214                 | 0.4105                | 0.4                   |
| 1749            | 0                    | 0.143                 | 0.224                 | 0.22                  | 11204           | 0.03                 | 0.268                 | 0.4193                | 0.42                  |
| 15288           | 0                    | 0.152                 | 0.236                 | 0.228                 | 210             | 0                    | 0.273                 | 0.4208                | 0.42                  |
| 2067            | 0                    | 0.137                 | 0.236                 | 0.23                  | 1876            | 0.01                 | 0.281                 | 0.424                 | 0.421                 |
| 1996            | 0                    | 0.128                 | 0.237                 | 0.234                 | 2322            | 0                    | 0.235                 | 0.433                 | 0.43                  |
| 1220            | 0                    | 0.203                 | 0.243                 | 0.24                  | 15255           | 0.06                 | 0.326                 | 0.4335                | 0.43                  |
| 215             | 0.03                 | 0.208                 | 0.2458                | 0.246                 | 11023           | 0.08                 | 0.317                 | 0.4373                | 0.435                 |
| 6160            | 0.02                 | 0.211                 | 0.249                 | 0.245                 | 2310            | 0                    | 0.28                  | 0.4383                | 0.435                 |
| 216             | 0.01                 | 0.206                 | 0.2518                | 0.25                  | 4073            | 0                    | 0.313                 | 0.4428                | 0.44                  |
| 7834            | 0.05                 | 0.214                 | 0.259                 | 0.261                 | 6617            | 0                    | 0.279                 | 0.445                 | 0.446                 |
| 2276            | 0                    | 0.205                 | 0.2698                | 0.27                  | 8547            | 0                    | 0.324                 | 0.455                 | 0.45                  |
| 4158            | 0                    | 0.2                   | 0.2715                | 0.272                 | 6               | 0.07                 | 0.319                 | 0.4565                | 0.458                 |
| 8373            | 0                    | 0.212                 | 0.284                 | 0.283                 | 7               | 0.08                 | 0.26                  | 0.4628                | 0.46                  |
| 217             | 0.06                 | 0.219                 | 0.293                 | 0.29                  | 3990            | 0.09                 | 0.352                 | 0.47                  | 0.472                 |
| 4148            | 0                    | 0.24                  | 0.2963                | 0.295                 | 2066            | 0                    | 0.361                 | 0.472                 | 0.479                 |
| 7772            | 0                    | 0.247                 | 0.299                 | 0.3                   | 3303            | 0                    | 0.332                 | 0.472                 | 0.476                 |
| 214             | 0.02                 | 0.251                 | 0.2995                | 0.302                 | 10533           | 0.102                | 0.378                 | 0.473                 | 0.475                 |
| 3169            | 0.05                 | 0.254                 | 0.3028                | 0.302                 | 4272            | 0.1                  | 0.384                 | 0.4755                | 0.476                 |
| 11569           | 0.01                 | 0.236                 | 0.3048                | 0.31                  | 5               | 0.009                | 0.404                 | 0.476                 | 0.477                 |
| 1194            | 0.03                 | 0.251                 | 0.306                 | 0.3                   | 1886            | 0.108                | 0.331                 | 0.477                 | 0.483                 |
| 2232            | 0                    | 0.223                 | 0.314                 | 0.315                 | 3977            | 0.103                | 0.417                 | 0.4843                | 0.486                 |
| 1607            | 0.07                 | 0.27                  | 0.318                 | 0.315                 | 2187            | 0.105                | 0.43                  | 0.4865                | 0.485                 |
| 1287            | 0.07                 | 0.264                 | 0.319                 | 0.32                  | 10697           | 0.108                | 0.423                 | 0.487                 | 0.487                 |
| 2001            | 0                    | 0.136                 | 0.338                 | 0.34                  | 209             | 0                    | 0.313                 | 0.4873                | 0.488                 |
| 6211            | 0                    | 0.214                 | 0.348                 | 0.34                  | 4150            | 0                    | 0.419                 | 0.4913                | 0.49                  |
| 191             | 0                    | 0.182                 | 0.348                 | 0.35                  | 3707            | 0                    | 0.45                  | 0.496                 | 0.495                 |
| 1074            | 0                    | 0.203                 | 0.352                 | 0.35                  | 1214            | 0                    | 0.432                 | 0.499                 | 0.51                  |
| 1931            | 0                    | 0.153                 | 0.353                 | 0.355                 | 3788            | 0                    | 0.347                 | 0.4998                | 0.53                  |
| 8678            | 0                    | 0.218                 | 0.357                 | 0.36                  | 192             | 0                    | 0.426                 | 0.501                 | 0.51                  |
| 8               | 0                    | 0.213                 | 0.367                 | 0.361                 | 7663            | 0                    | 0.433                 | 0.503                 | 0.51                  |
| 213             | 0.02                 | 0.221                 | 0.3713                | 0.37                  | 1008            | 0                    | 0.354                 | 0.505                 | 0.516                 |
| 14122           | 0.09                 | 0.227                 | 0.3723                | 0.37                  | 13738           | 0                    | 0.472                 | 0.511                 | 0.523                 |
| <b>Isolates</b> | <b>6hrs<br/>(OD)</b> | <b>12hrs<br/>(OD)</b> | <b>18hrs<br/>(OD)</b> | <b>24hrs<br/>(OD)</b> | <b>Isolates</b> | <b>6hrs<br/>(OD)</b> | <b>12hrs<br/>(OD)</b> | <b>18hrs<br/>(OD)</b> | <b>24hrs<br/>(OD)</b> |

## Supplementary Data 2: Effect of Incubation Period

|         |                 |             |              |              |              |                 |              |              |              |             |
|---------|-----------------|-------------|--------------|--------------|--------------|-----------------|--------------|--------------|--------------|-------------|
| 4179    | 0               | 0.431       | 0.516        | 0.513        | 1772         | 0.12            | 0.627        | 0.74         | 0.751        |             |
| 11111   | 0.103           | 0.425       | 0.5238       | 0.526        | 4067         | 0.109           | 0.618        | 0.7545       | 0.752        |             |
| 11095   | 0.121           | 0.319       | 0.539        | 0.542        | 2204/2294    | 0.085           | 0.521        | 0.761        | 0.768        |             |
| 13328   | 0.113           | 0.413       | 0.548        | 0.551        | 2517         | 0.114           | 0.653        | 0.764        | 0.76         |             |
| 13409   | 0.105           | 0.396       | 0.5685       | 0.571        | 2190         | 0.11            | 0.552        | 0.764        | 0.767        |             |
| 1922(F) | 0               | 0.392       | 0.573        | 0.575        | 3811         | 0.107           | 0.602        | 0.7658       | 0.77         |             |
| 2296    | 0               | 0.36        | 0.5735       | 0.575        | 11040        | 0.093           | 0.575        | 0.766        | 0.768        |             |
| 2263    | 0               | 0.411       | 0.574        | 0.581        | 1315         | 0.114           | 0.57         | 0.767        | 0.772        |             |
| 4066    | 0               | 0.427       | 0.5765       | 0.582        | 9607         | 0.099           | 0.572        | 0.773        | 0.779        |             |
| 6563    | 0.105           | 0.414       | 0.578        | 0.57         | 7877         | 0.127           | 0.622        | 0.775        | 0.8          |             |
| 3906    | 0.1             | 0.423       | 0.58         | 0.586        | 1            | 0.108           | 0.614        | 0.777        | 0.793        |             |
| 3357    | 0.11            | 0.422       | 0.5855       | 0.583        | 2551         | 0.129           | 0.633        | 0.779        | 0.753        |             |
| 2       | 0.12            | 0.437       | 0.594        | 0.59         | 14730        | 0.13            | 0.658        | 0.8078       | 0.82         |             |
| 13836   | 0.13            | 0.352       | 0.5985       | 0.597        | 3022         | 0.136           | 0.72         | 0.8125       | 0.764        |             |
| 9       | 0               | 0.418       | 0.6003       | 0.61         | 7520         | 0.132           | 0.691        | 0.817        | 0.804        |             |
| 2359    | 0.12            | 0.404       | 0.6068       | 0.613        | 198          | 0.106           | 0.684        | 0.827        | 0.81         |             |
| 2359    | 0.108           | 0.441       | 0.6068       | 0.611        | 3807         | 0.123           | 0.667        | 0.8315       | 0.824        |             |
| 1609    | 0.103           | 0.511       | 0.624        | 0.62         | 194          | 0.139           | 0.7          | 0.832        | 0.838        |             |
| 51      | 0               | 0.439       | 0.625        | 0.628        | 3293         | 0.14            | 0.703        | 0.8335       | 0.834        |             |
| 190     | 0.12            | 0.519       | 0.628        | 0.631        | 2070         | 0.14            | 0.709        | 0.8533       | 0.85         |             |
| 11109   | 0.103           | 0.483       | 0.6333       | 0.637        | 3            | 0.132           | 0.663        | 0.8568       | 0.86         |             |
| 1740    | 0.108           | 0.471       | 0.645        | 0.65         | 1882         | 0.138           | 0.721        | 0.862        | 0.865        |             |
| 1972    | 0.101           | 0.478       | 0.653        | 0.651        | 7327         | 0.132           | 0.684        | 0.862        | 0.857        |             |
| 3917    | 0.083           | 0.43        | 0.6563       | 0.65         | 12110        | 0.135           | 0.711        | 0.8693       | 0.9          |             |
| 1583    | 0.113           | 0.474       | 0.664        | 0.67         | 8315         | 0.134           | 0.723        | 0.884        | 0.847        |             |
| 14514   | 0.121           | 0.512       | 0.6728       | 0.668        | 14842        | 0.142           | 0.762        | 0.8865       | 0.89         |             |
| 3869    | 0.095           | 0.487       | 0.6803       | 0.675        | 4840         | 0.131           | 0.694        | 0.888        | 0.9          |             |
| 2965    | 0.11            | 0.499       | 0.6818       | 0.68         | 8301         | 0.132           | 0.699        | 0.9          | 0.886        |             |
| 2972    | 0.089           | 0.464       | 0.686        | 0.682        | 14696        | 0.15            | 0.758        | 0.9018       | 0.92         |             |
| 1974    | 0.103           | 0.517       | 0.693        | 0.689        | 8342         | 0.147           | 0.756        | 0.905        | 0.9          |             |
| 12027   | 0.091           | 0.481       | 0.6938       | 0.691        | 2171         | 0.143           | 0.762        | 0.905        | 0.92         |             |
| 10      | 0.108           | 0.515       | 0.6968       | 0.697        | 9032         | 0.121           | 0.697        | 0.908        | 0.893        |             |
| 11600   | 0.112           | 0.524       | 0.7          | 0.72         | 2485         | 0.138           | 0.726        | 0.9193       | 0.924        |             |
| 4268    | 0.115           | 0.539       | 0.7098       | 0.71         | 14881        | 0.142           | 0.74         | 0.9263       | 0.923        |             |
| 3294    | 0.093           | 0.528       | 0.712        | 0.7          | 3557         | 0.129           | 0.738        | 0.9313       | 0.9          |             |
| 200     | 0.104           | 0.564       | 0.714        | 0.719        | 4020         | 0.146           | 0.742        | 0.957        | 0.942        |             |
| 2822    | 0.106           | 0.573       | 0.716        | 0.715        | 4289         | 0.152           | 0.721        | 0.9628       | 0.959        |             |
| 193     | 0.097           | 0.581       | 0.722        | 0.718        | 4238         | 0.127           | 0.706        | 0.963        | 0.961        |             |
| 14310   | 0.086           | 0.552       | 0.7248       | 0.72         | 12998        | 0.153           | 0.71         | 0.9638       | 0.96         |             |
| 993     | 0.117           | 0.66        | 0.733        | 0.726        |              | <b>6hrs</b>     | <b>12hrs</b> | <b>18hrs</b> | <b>24hrs</b> |             |
|         | <b>Isolates</b> | <b>6hrs</b> | <b>12hrs</b> | <b>18hrs</b> | <b>24hrs</b> | <b>Isolates</b> | <b>(OD)</b>  | <b>(OD)</b>  | <b>(OD)</b>  | <b>(OD)</b> |
|         |                 | <b>(OD)</b> | <b>(OD)</b>  | <b>(OD)</b>  | <b>(OD)</b>  |                 |              |              |              |             |
|         |                 |             |              |              |              | 3248            | 0.158        | 0.731        | 0.9693       | 0.968       |
| 4182    | 0.101           | 0.565       | 0.738        | 0.742        | 11           | 0.153           | 0.74         | 0.97         | 0.975        |             |



## Supplementary Data 2: Effect of Incubation Period

|                 |             |              |              |              |                 |             |              |              |              |
|-----------------|-------------|--------------|--------------|--------------|-----------------|-------------|--------------|--------------|--------------|
| 10915           | 0.143       | 0.675        | 0.972        | 0.968        | 195             | 0.155       | 0.735        | 1.43         | 1.417        |
| 3830            | 0.15        | 0.658        | 0.9758       | 0.95         | 13657           | 0.173       | 0.831        | 1.454        | 1.46         |
| 9517            | 0.135       | 0.697        | 1.005        | 1.11         | 4299            | 0.167       | 0.786        | 1.488        | 1.49         |
| 2717            | 0.156       | 0.743        | 1.012        | 0.988        | 8436            | 0.175       | 0.833        | 1.51         | 1.5          |
| 9972            | 0.145       | 0.724        | 1.026        | 1.21         | 10101           | 0.178       | 0.864        | 1.525        | 1.53         |
| 15724           | 0.157       | 0.752        | 1.042        | 1.2          | 13797           | 0.18        | 0.869        | 1.525        | 1.528        |
| 8571            | 0.151       | 0.75         | 1.058        | 1.23         | 13059           | 0.182       | 0.873        | 1.543        | 1.6          |
| 1318            | 0.136       | 0.597        | 1.085        | 1.1          | 13603           | 0.166       | 0.797        | 1.553        | 1.59         |
| 2825            | 0.144       | 0.689        | 1.091        | 1.03         | 14478           | 0.185       | 0.882        | 1.565        | 1.54         |
| 12084           | 0.14        | 0.662        | 1.119        | 1.1          | 1338            | 0.184       | 0.854        | 1.571        | 1.569        |
| 10046           | 0.155       | 0.764        | 1.143        | 1.13         | 3362            | 0.189       | 0.931        | 1.585        | 1.583        |
| 13423           | 0.151       | 0.743        | 1.147        | 1.15         | 2588            | 0.166       | 0.839        | 1.59         | 1.62         |
| 1313            | 0.142       | 0.771        | 1.156        | 0.935        | 12497           | 0.173       | 0.85         | 1.597        | 1.624        |
| 3160            | 0.133       | 0.698        | 1.156        | 0.914        | 197             | 0.19        | 0.92         | 1.602        | 1.66         |
| 4059            | 0.144       | 0.725        | 1.157        | 0.93         | 2056(PA)        | 0.19        | 0.895        | 1.632        | 1.629        |
| 6752            | 0.159       | 0.764        | 1.163        | 0.926        | 13306           | 0.188       | 0.891        | 1.641        | 1.638        |
| 4073            | 0.146       | 0.734        | 1.169        | 1.03         | Sim             | 0.193       | 0.922        | 1.655        | 1.65         |
| 14944           | 0.152       | 0.755        | 1.185        | 1.2          | 14068           | 0.193       | 0.929        | 1.674        | 1.663        |
| 14735           | 0.15        | 0.759        | 1.186        | 1.22         | 1922 R          | 0.196       | 0.934        | 1.675        | 1.67         |
| 2164            | 0.147       | 0.713        | 1.187        | 1.2          | 1240            | 0.19        | 0.917        | 1.682        | 1.676        |
| 2700            | 0.148       | 0.697        | 1.195        | 1.25         | 12566           | 0.178       | 0.864        | 1.693        | 1.709        |
| 10723           | 0.143       | 0.678        | 1.216        | 1.29         | 12617           | 0.189       | 0.932        | 1.752        | 1.728        |
| 3398            | 0.16        | 0.82         | 1.225        | 1.3          | 2187            | 0.197       | 0.951        | 1.756        | 1.75         |
| 1210            | 0.16        | 0.792        | 1.226        | 1.23         | 10872           | 0.197       | 0.867        | 1.757        | 1.76         |
| 212             | 0.157       | 0.786        | 1.24         | 1.28         | 3415            | 0.195       | 0.924        | 1.758        | 1.76         |
| 10825           | 0.145       | 0.779        | 1.25         | 1.29         | 4227            | 0.199       | 1.092        | 1.762        | 1.758        |
| 3724            | 0.162       | 0.783        | 1.269        | 1.272        | 14350           | 0.196       | 0.976        | 1.775        | 1.773        |
| 3652            | 0.154       | 0.794        | 1.279        | 1.283        | 3593            | 0.2         | 1.08         | 1.802        | 1.8          |
| 201             | 0.159       | 0.766        | 1.279        | 1.286        | 3690            | 0.191       | 0.955        | 1.811        | 1.82         |
| 7884            | 0.142       | 0.749        | 1.282        | 1.24         | 2010            | 0.183       | 0.947        | 1.842        | 1.817        |
| 15718           | 0.151       | 0.795        | 1.298        | 1.237        | 14345           | 0.163       | 0.894        | 1.864        | 1.854        |
| 14513           | 0.164       | 0.8          | 1.311        | 1.3          | 13962           | 0.175       | 0.916        | 1.864        | 1.86         |
| 6585            | 0.177       | 0.821        | 1.329        | 1.302        | 10088           | 0.182       | 0.922        | 1.874        | 1.872        |
| 15521           | 0.17        | 0.814        | 1.33         | 1.31         | 14203           | 0.185       | 0.964        | 1.886        | 1.877        |
| 2503            | 0.159       | 0.763        | 1.339        | 1.32         | 6708            | 0.179       | 0.991        | 1.893        | 1.853        |
| 1309            | 0.163       | 0.794        | 1.341        | 1.327        | 10012           | 0.21        | 1.07         | 1.903        | 1.89         |
| 2173            | 0.161       | 0.786        | 1.351        | 1.346        | 2086            | 0.2         | 0.996        | 1.985        | 1.92         |
| 3709            | 0.154       | 0.775        | 1.371        | 1.35         |                 | <b>6hrs</b> | <b>12hrs</b> | <b>18hrs</b> | <b>24hrs</b> |
| <b>Isolates</b> | <b>6hrs</b> | <b>12hrs</b> | <b>18hrs</b> | <b>24hrs</b> | <b>Isolates</b> | <b>(OD)</b> | <b>(OD)</b>  | <b>(OD)</b>  | <b>(OD)</b>  |
|                 | <b>(OD)</b> | <b>(OD)</b>  | <b>(OD)</b>  | <b>(OD)</b>  | 15603           | 0.23        | 1.19         | 2.011        | 2.1          |
| 2498            | 0.151       | 0.773        | 1.392        | 1.42         | 2138            | 0.211       | 1.034        | 2.089        | 1.98         |
| 1834            | 0.132       | 0.587        | 1.398        | 1.46         | 1337            | 0.213       | 1.06         | 2.099        | 1.91         |
| 10807           | 0.128       | 0.693        | 1.408        | 1.44         | 145             | 0.191       | 0.963        | 2.186        | 2.21         |

## Supplementary Data 2: Effect of Incubation Period

|       |       |       |       |       |
|-------|-------|-------|-------|-------|
| 2895  | 0.24  | 1.24  | 2.254 | 2.17  |
| 12600 | 0.215 | 1.132 | 2.261 | 2.19  |
| 2196  | 0.221 | 1.29  | 2.333 | 2.24  |
| 2931  | 0.224 | 1.187 | 2.378 | 2.35  |
| 15598 | 0.229 | 1.46  | 2.576 | 2.41  |
| 10894 | 0.214 | 1.367 | 2.623 | 2.581 |
| 2844  | 0.211 | 1.375 | 2.672 | 2.593 |
| 196   | 0.197 | 1.14  | 2.804 | 2.657 |
| 497   | 0.206 | 1.259 | 2.939 | 2.734 |
| 1739  | 0.198 | 1.168 | 3.118 | 2.98  |
| 2887  | 0.192 | 1.322 | 3.423 | 3.076 |
| 10869 | 0.173 | 0.967 | 3.667 | 3.215 |
| 3420  | 0.155 | 0.966 | 3.689 | 3.361 |

**Supplementary Data 3: Effect of salt concentration (sodium chloride) on biofilm production**

| <b>Isolates</b> | <b>BHI W/-</b> | <b>NaCl 1%</b> | <b>NaCl 2%</b> | <b>NaCl 4%</b> | <b>NaCl 8%</b> |
|-----------------|----------------|----------------|----------------|----------------|----------------|
| 222             | 0.145          | 0.157          | 0.169          | 0.276          | 0.227          |
| 989             | 0.164          | 0.178          | 0.191          | 0.289          | 0.235          |
| 1606            | 0.173          | 0.182          | 0.195          | 0.273          | 0.218          |
| 1249            | 0.186          | 0.197          | 0.218          | 0.291          | 0.211          |
| 997             | 0.198          | 0.212          | 0.224          | 0.314          | 0.252          |
| 1250            | 0.2            | 0.234          | 0.278          | 0.324          | 0.301          |
| 1929            | 0.201          | 0.214          | 0.267          | 0.322          | 0.286          |
| 3179            | 0.2168         | 0.223          | 0.269          | 0.319          | 0.274          |
| 1252            | 0.221          | 0.229          | 0.271          | 0.326          | 0.289          |
| 1749            | 0.224          | 0.232          | 0.276          | 0.325          | 0.273          |
| 15288           | 0.236          | 0.261          | 0.286          | 0.331          | 0.311          |
| 2067            | 0.236          | 0.243          | 0.267          | 0.319          | 0.253          |
| 1996            | 0.237          | 0.244          | 0.269          | 0.323          | 0.247          |
| 1220            | 0.243          | 0.261          | 0.287          | 0.319          | 0.255          |
| 215             | 0.2458         | 0.26           | 0.293          | 0.321          | 0.293          |
| 6160            | 0.249          | 0.254          | 0.279          | 0.311          | 0.262          |
| 216             | 0.2518         | 0.269          | 0.281          | 0.324          | 0.294          |
| 7834            | 0.259          | 0.273          | 0.291          | 0.324          | 0.254          |
| 2276            | 0.2698         | 0.281          | 0.312          | 0.363          | 0.337          |
| 4158            | 0.2715         | 0.283          | 0.311          | 0.354          | 0.318          |
| 8373            | 0.284          | 0.295          | 0.326          | 0.367          | 0.321          |
| 217             | 0.293          | 0.306          | 0.322          | 0.361          | 0.343          |
| 4148            | 0.2963         | 0.312          | 0.339          | 0.357          | 0.312          |
| 7772            | 0.299          | 0.31           | 0.324          | 0.362          | 0.327          |
| 214             | 0.2995         | 0.314          | 0.322          | 0.368          | 0.346          |
| 3169            | 0.3028         | 0.316          | 0.334          | 0.372          | 0.339          |
| 11569           | 0.3048         | 0.325          | 0.351          | 0.386          | 0.358          |
| 1194            | 0.306          | 0.32           | 0.346          | 0.377          | 0.33           |
| 2232            | 0.314          | 0.328          | 0.345          | 0.371          | 0.348          |
| 1607            | 0.318          | 0.322          | 0.337          | 0.364          | 0.329          |
| 1287            | 0.319          | 0.322          | 0.342          | 0.36           | 0.335          |
| 2001            | 0.338          | 0.344          | 0.36           | 0.382          | 0.354          |
| 6211            | 0.348          | 0.351          | 0.363          | 0.38           | 0.355          |
| 191             | 0.348          | 0.355          | 0.372          | 0.392          | 0.376          |
| 1074            | 0.352          | 0.35           | 0.377          | 0.391          | 0.382          |
| 1931            | 0.353          | 0.359          | 0.373          | 0.388          | 0.351          |
| 8678            | 0.357          | 0.36           | 0.375          | 0.39           | 0.367          |
| 8               | 0.367          | 0.37           | 0.379          | 0.392          | 0.381          |
| 213             | 0.3713         | 0.378          | 0.383          | 0.396          | 0.384          |
| 14122           | 0.3723         | 0.381          | 0.394          | 0.402          | 0.387          |
| 4079            | 0.3728         | 0.38           | 0.388          | 0.41           | 0.391          |

**Supplementary Data 3: Effect of salt concentration (sodium chloride) on biofilm production**

|       |        |       |       |       |       |
|-------|--------|-------|-------|-------|-------|
| 2989  | 0.373  | 0.384 | 0.391 | 0.413 | 0.401 |
| 5993  | 0.374  | 0.389 | 0.397 | 0.411 | 0.397 |
| 15311 | 0.3818 | 0.39  | 0.425 | 0.441 | 0.428 |
| 4008  | 0.392  | 0.403 | 0.428 | 0.452 | 0.439 |
| 12    | 0.394  | 0.407 | 0.431 | 0.455 | 0.442 |
| 6122  | 0.399  | 0.4   | 0.429 | 0.452 | 0.43  |
| 4     | 0.4    | 0.44  | 0.482 | 0.503 | 0.491 |
| 4151  | 0.4105 | 0.426 | 0.441 | 0.472 | 0.453 |
| 11204 | 0.4193 | 0.432 | 0.457 | 0.488 | 0.461 |
| 210   | 0.4208 | 0.443 | 0.479 | 0.511 | 0.495 |
| 1876  | 0.424  | 0.451 | 0.482 | 0.522 | 0.493 |
| 2322  | 0.433  | 0.45  | 0.476 | 0.513 | 0.491 |
| 15255 | 0.4335 | 0.452 | 0.473 | 0.507 | 0.478 |
| 11023 | 0.4373 | 0.461 | 0.48  | 0.524 | 0.486 |
| 2310  | 0.4383 | 0.464 | 0.492 | 0.537 | 0.512 |
| 4073  | 0.4428 | 0.47  | 0.497 | 0.542 | 0.523 |
| 6617  | 0.445  | 0.468 | 0.489 | 0.544 | 0.526 |
| 8547  | 0.455  | 0.47  | 0.494 | 0.541 | 0.528 |
| 6     | 0.4565 | 0.473 | 0.503 | 0.552 | 0.531 |
| 7     | 0.4628 | 0.478 | 0.51  | 0.558 | 0.544 |
| 3990  | 0.47   | 0.485 | 0.521 | 0.566 | 0.539 |
| 2066  | 0.472  | 0.482 | 0.517 | 0.561 | 0.533 |
| 3303  | 0.472  | 0.49  | 0.528 | 0.563 | 0.55  |
| 10533 | 0.473  | 0.483 | 0.519 | 0.551 | 0.534 |
| 4272  | 0.4755 | 0.486 | 0.524 | 0.56  | 0.541 |
| 5     | 0.476  | 0.491 | 0.533 | 0.572 | 0.566 |
| 1886  | 0.477  | 0.512 | 0.561 | 0.583 | 0.562 |
| 3977  | 0.4843 | 0.505 | 0.547 | 0.572 | 0.554 |
| 2187  | 0.4865 | 0.51  | 0.553 | 0.58  | 0.56  |
| 10697 | 0.487  | 0.513 | 0.549 | 0.584 | 0.547 |
| 209   | 0.4873 | 0.522 | 0.558 | 0.592 | 0.581 |
| 4150  | 0.4913 | 0.516 | 0.543 | 0.579 | 0.556 |
| 3707  | 0.496  | 0.515 | 0.538 | 0.566 | 0.542 |
| 1214  | 0.499  | 0.527 | 0.554 | 0.583 | 0.563 |
| 3788  | 0.4998 | 0.519 | 0.549 | 0.577 | 0.558 |
| 192   | 0.501  | 0.531 | 0.563 | 0.59  | 0.576 |
| 7663  | 0.503  | 0.535 | 0.568 | 0.597 | 0.582 |
| 1008  | 0.505  | 0.533 | 0.568 | 0.592 | 0.585 |
| 13738 | 0.511  | 0.538 | 0.573 | 0.596 | 0.588 |
| 4179  | 0.516  | 0.536 | 0.58  | 0.597 | 0.583 |
| 11111 | 0.5238 | 0.542 | 0.586 | 0.603 | 0.592 |
| 11095 | 0.539  | 0.548 | 0.591 | 0.614 | 0.596 |
| 13328 | 0.548  | 0.574 | 0.606 | 0.619 | 0.595 |

**Supplementary Data 3: Effect of salt concentration (sodium chloride) on biofilm production**

|           |        |       |       |       |       |
|-----------|--------|-------|-------|-------|-------|
| 13409     | 0.5685 | 0.582 | 0.61  | 0.634 | 0.605 |
| 1922(F)   | 0.573  | 0.587 | 0.63  | 0.673 | 0.662 |
| 2296      | 0.5735 | 0.592 | 0.634 | 0.682 | 0.668 |
| 2263      | 0.574  | 0.597 | 0.638 | 0.688 | 0.672 |
| 4066      | 0.5765 | 0.594 | 0.625 | 0.671 | 0.653 |
| 6563      | 0.578  | 0.591 | 0.629 | 0.678 | 0.663 |
| 3906      | 0.58   | 0.602 | 0.635 | 0.684 | 0.671 |
| 3357      | 0.5855 | 0.611 | 0.639 | 0.682 | 0.668 |
| 2         | 0.594  | 0.622 | 0.647 | 0.685 | 0.673 |
| 13836     | 0.5985 | 0.623 | 0.641 | 0.684 | 0.662 |
| 9         | 0.6003 | 0.627 | 0.649 | 0.688 | 0.675 |
| 2359      | 0.6068 | 0.625 | 0.638 | 0.674 | 0.661 |
| 2359      | 0.6068 | 0.625 | 0.638 | 0.674 | 0.661 |
| 1609      | 0.624  | 0.644 | 0.67  | 0.695 | 0.682 |
| 51        | 0.625  | 0.641 | 0.664 | 0.698 | 0.687 |
| 190       | 0.628  | 0.644 | 0.669 | 0.75  | 0.693 |
| 11109     | 0.6333 | 0.649 | 0.672 | 0.783 | 0.681 |
| 1740      | 0.645  | 0.653 | 0.671 | 0.782 | 0.715 |
| 1972      | 0.653  | 0.66  | 0.679 | 0.788 | 0.733 |
| 3917      | 0.6563 | 0.662 | 0.681 | 0.784 | 0.725 |
| 1583      | 0.664  | 0.672 | 0.684 | 0.789 | 0.75  |
| 14514     | 0.6728 | 0.685 | 0.725 | 0.774 | 0.733 |
| 3869      | 0.6803 | 0.692 | 0.723 | 0.779 | 0.758 |
| 2965      | 0.6818 | 0.69  | 0.727 | 0.773 | 0.752 |
| 2972      | 0.686  | 0.695 | 0.724 | 0.781 | 0.748 |
| 1974      | 0.693  | 0.725 | 0.747 | 0.79  | 0.773 |
| 12027     | 0.6938 | 0.718 | 0.732 | 0.786 | 0.754 |
| 10        | 0.6968 | 0.722 | 0.743 | 0.788 | 0.776 |
| 11600     | 0.7    | 0.726 | 0.753 | 0.784 | 0.772 |
| 4268      | 0.7098 | 0.719 | 0.745 | 0.775 | 0.753 |
| 3294      | 0.712  | 0.733 | 0.759 | 0.786 | 0.766 |
| 200       | 0.714  | 0.724 | 0.767 | 0.792 | 0.781 |
| 2822      | 0.716  | 0.722 | 0.764 | 0.797 | 0.775 |
| 193       | 0.722  | 0.736 | 0.772 | 0.81  | 0.794 |
| 14310     | 0.7248 | 0.738 | 0.763 | 0.793 | 0.772 |
| 993       | 0.733  | 0.742 | 0.776 | 0.803 | 0.78  |
| 4182      | 0.738  | 0.745 | 0.771 | 0.804 | 0.786 |
| 1772      | 0.74   | 0.753 | 0.779 | 0.824 | 0.795 |
| 4067      | 0.7545 | 0.769 | 0.783 | 0.833 | 0.812 |
| 2204/2294 | 0.761  | 0.773 | 0.788 | 0.828 | 0.806 |
| 2517      | 0.764  | 0.764 | 0.773 | 0.816 | 0.798 |
| 2190      | 0.764  | 0.773 | 0.796 | 0.823 | 0.805 |
| 3811      | 0.7658 | 0.779 | 0.803 | 0.834 | 0.819 |

**Supplementary Data 3: Effect of salt concentration (sodium chloride) on biofilm production**

|       |        |       |       |       |       |
|-------|--------|-------|-------|-------|-------|
| 11040 | 0.766  | 0.782 | 0.814 | 0.846 | 0.817 |
| 1315  | 0.767  | 0.777 | 0.799 | 0.828 | 0.816 |
| 9607  | 0.773  | 0.794 | 0.817 | 0.833 | 0.821 |
| 7877  | 0.775  | 0.801 | 0.825 | 0.848 | 0.827 |
| 1     | 0.777  | 0.807 | 0.819 | 0.853 | 0.836 |
| 2551  | 0.779  | 0.81  | 0.828 | 0.851 | 0.832 |
| 14730 | 0.8078 | 0.815 | 0.831 | 0.866 | 0.836 |
| 3022  | 0.8125 | 0.83  | 0.863 | 0.891 | 0.883 |
| 7520  | 0.817  | 0.822 | 0.855 | 0.886 | 0.862 |
| 198   | 0.827  | 0.837 | 0.861 | 0.893 | 0.887 |
| 3807  | 0.8315 | 0.841 | 0.859 | 0.884 | 0.861 |
| 194   | 0.832  | 0.848 | 0.866 | 0.892 | 0.873 |
| 3293  | 0.8335 | 0.844 | 0.863 | 0.885 | 0.869 |
| 2070  | 0.8533 | 0.871 | 0.893 | 0.921 | 0.962 |
| 3     | 0.8568 | 0.875 | 0.897 | 0.931 | 0.918 |
| 1882  | 0.862  | 0.882 | 0.924 | 0.953 | 0.941 |
| 7327  | 0.862  | 0.887 | 0.932 | 0.961 | 0.948 |
| 12110 | 0.8693 | 0.883 | 0.924 | 0.955 | 0.927 |
| 8315  | 0.884  | 0.925 | 0.958 | 0.983 | 0.964 |
| 14842 | 0.8865 | 0.921 | 0.952 | 0.975 | 0.961 |
| 4840  | 0.888  | 0.928 | 0.956 | 0.986 | 0.966 |
| 8301  | 0.9    | 0.924 | 0.95  | 0.983 | 0.972 |
| 14696 | 0.9018 | 0.927 | 0.948 | 0.973 | 0.951 |
| 8342  | 0.905  | 0.925 | 0.955 | 0.984 | 0.974 |
| 2171  | 0.905  | 0.927 | 0.958 | 0.981 | 0.973 |
| 9032  | 0.908  | 0.923 | 0.951 | 0.976 | 0.965 |
| 2485  | 0.9193 | 0.928 | 0.966 | 0.993 | 0.98  |
| 14881 | 0.9263 | 0.935 | 0.962 | 0.985 | 0.968 |
| 3557  | 0.9313 | 0.946 | 0.977 | 0.993 | 0.984 |
| 4020  | 0.957  | 0.967 | 0.984 | 1.021 | 0.992 |
| 4289  | 0.9628 | 0.973 | 0.983 | 1.028 | 0.995 |
| 4238  | 0.963  | 0.968 | 0.988 | 1.025 | 0.985 |
| 12998 | 0.9638 | 0.977 | 0.991 | 1.056 | 0.998 |
| 3248  | 0.9693 | 0.976 | 1.019 | 1.103 | 1.03  |
| 11    | 0.97   | 0.985 | 1.119 | 1.137 | 1.11  |
| 10915 | 0.972  | 0.979 | 1.103 | 1.134 | 1.11  |
| 3830  | 0.9758 | 0.982 | 1.111 | 1.138 | 1.118 |
| 9517  | 1.005  | 1.109 | 1.139 | 1.165 | 1.153 |
| 2717  | 1.012  | 1.11  | 1.148 | 1.172 | 1.166 |
| 9972  | 1.026  | 1.172 | 1.208 | 1.286 | 1.221 |
| 15724 | 1.042  | 1.165 | 1.197 | 1.254 | 1.205 |
| 8571  | 1.058  | 1.177 | 1.213 | 1.279 | 1.243 |
| 1318  | 1.085  | 1.18  | 1.224 | 1.281 | 1.267 |

**Supplementary Data 3: Effect of salt concentration (sodium chloride) on biofilm production**

|       |       |        |       |       |       |
|-------|-------|--------|-------|-------|-------|
| 2825  | 1.091 | 1.169  | 1.217 | 1.273 | 1.252 |
| 12084 | 1.119 | 1.192  | 1.269 | 1.334 | 1.286 |
| 10046 | 1.143 | 1.187  | 1.254 | 1.331 | 1.273 |
| 13423 | 1.147 | 1.196  | 1.273 | 1.358 | 1.295 |
| 1313  | 1.156 | 1.191  | 1.264 | 1.347 | 1.304 |
| 3160  | 1.156 | 1.203  | 1.281 | 1.366 | 1.332 |
| 4059  | 1.157 | 1.2    | 1.258 | 1.361 | 1.342 |
| 6752  | 1.163 | 1.233  | 1.284 | 1.355 | 1.336 |
| 4073  | 1.169 | 1.231  | 1.281 | 1.37  | 1.346 |
| 14944 | 1.185 | 1.25   | 1.292 | 1.386 | 1.344 |
| 14735 | 1.186 | 1.258  | 1.287 | 1.392 | 1.357 |
| 2164  | 1.187 | 1.246  | 1.283 | 1.377 | 1.351 |
| 2700  | 1.195 | 1.263  | 1.295 | 1.395 | 1.376 |
| 10723 | 1.216 | 1.282  | 1.347 | 1.402 | 1.391 |
| 3398  | 1.225 | 1.276  | 1.354 | 1.389 | 1.371 |
| 1210  | 1.226 | 1.2803 | 1.351 | 1.391 | 1.367 |
| 212   | 1.24  | 1.291  | 1.373 | 1.407 | 1.39  |
| 10825 | 1.25  | 1.296  | 1.394 | 1.5   | 1.434 |
| 3724  | 1.269 | 1.305  | 1.41  | 1.544 | 1.496 |
| 3652  | 1.279 | 1.295  | 1.391 | 1.52  | 1.483 |
| 201   | 1.279 | 1.302  | 1.413 | 1.56  | 1.49  |
| 7884  | 1.282 | 1.307  | 1.425 | 1.554 | 1.502 |
| 15718 | 1.298 | 1.314  | 1.433 | 1.621 | 1.523 |
| 14513 | 1.311 | 1.341  | 1.427 | 1.614 | 1.566 |
| 6585  | 1.329 | 1.355  | 1.454 | 1.627 | 1.59  |
| 15521 | 1.33  | 1.39   | 1.51  | 1.66  | 1.578 |
| 2503  | 1.339 | 1.367  | 1.449 | 1.589 | 1.571 |
| 1309  | 1.341 | 1.382  | 1.468 | 1.582 | 1.566 |
| 2173  | 1.351 | 1.389  | 1.529 | 1.601 | 1.587 |
| 3709  | 1.371 | 1.403  | 1.554 | 1.634 | 1.613 |
| 2498  | 1.392 | 1.431  | 1.59  | 1.662 | 1.647 |
| 1834  | 1.398 | 1.442  | 1.62  | 1.668 | 1.638 |
| 10807 | 1.408 | 1.468  | 1.634 | 1.679 | 1.655 |
| 195   | 1.43  | 1.492  | 1.652 | 1.683 | 1.671 |
| 13657 | 1.454 | 1.502  | 1.648 | 1.688 | 1.659 |
| 4299  | 1.488 | 1.521  | 1.657 | 1.675 | 1.662 |
| 8436  | 1.51  | 1.564  | 1.678 | 1.693 | 1.677 |
| 10101 | 1.525 | 1.582  | 1.691 | 1.722 | 1.703 |
| 13797 | 1.525 | 1.578  | 1.685 | 1.711 | 1.694 |
| 13059 | 1.543 | 1.603  | 1.694 | 1.756 | 1.699 |
| 13603 | 1.553 | 1.612  | 1.683 | 1.759 | 1.704 |
| 14478 | 1.565 | 1.62   | 1.691 | 1.763 | 1.715 |
| 1338  | 1.571 | 1.608  | 1.657 | 1.725 | 1.693 |

**Supplementary Data 3: Effect of salt concentration (sodium chloride) on biofilm production**

|          |       |       |       |       |       |
|----------|-------|-------|-------|-------|-------|
| 3362     | 1.585 | 1.625 | 1.668 | 1.736 | 1.704 |
| 2588     | 1.59  | 1.617 | 1.673 | 1.755 | 1.712 |
| 12497    | 1.597 | 1.622 | 1.693 | 1.766 | 1.694 |
| 197      | 1.602 | 1.63  | 1.682 | 1.745 | 1.721 |
| 2056(PA) | 1.632 | 1.652 | 1.698 | 1.783 | 1.716 |
| 13306    | 1.641 | 1.682 | 1.708 | 1.795 | 1.721 |
| Sim      | 1.655 | 1.677 | 1.713 | 1.812 | 1.752 |
| 14068    | 1.674 | 1.691 | 1.724 | 1.832 | 1.764 |
| 1922 R   | 1.675 | 1.685 | 1.715 | 1.824 | 1.735 |
| 1240     | 1.682 | 1.697 | 1.722 | 1.817 | 1.783 |
| 12566    | 1.693 | 1.723 | 1.766 | 1.885 | 1.816 |
| 12617    | 1.752 | 1.812 | 1.873 | 1.921 | 1.892 |
| 2187     | 1.756 | 1.783 | 1.825 | 1.893 | 1.866 |
| 10872    | 1.757 | 1.82  | 1.884 | 1.915 | 1.892 |
| 3415     | 1.758 | 1.812 | 1.857 | 1.896 | 1.871 |
| 4227     | 1.762 | 1.828 | 1.866 | 1.902 | 1.885 |
| 14350    | 1.775 | 1.864 | 1.892 | 1.956 | 1.912 |
| 3593     | 1.802 | 1.841 | 1.877 | 1.912 | 1.893 |
| 3690     | 1.811 | 1.856 | 1.891 | 1.945 | 1.921 |
| 2010     | 1.842 | 1.891 | 1.934 | 1.966 | 1.939 |
| 14345    | 1.864 | 1.911 | 1.956 | 2.051 | 1.969 |
| 13962    | 1.864 | 1.907 | 1.949 | 2.132 | 1.915 |
| 10088    | 1.874 | 1.915 | 1.961 | 2.117 | 1.893 |
| 14203    | 1.886 | 1.921 | 1.958 | 2.122 | 1.976 |
| 6708     | 1.893 | 1.916 | 1.952 | 2.105 | 1.953 |
| 10012    | 1.903 | 2.12  | 2.358 | 2.547 | 2.054 |
| 2086     | 1.985 | 2.107 | 2.324 | 2.531 | 2.317 |
| 15603    | 2.011 | 2.268 | 2.422 | 2.685 | 2.154 |
| 2138     | 2.089 | 2.155 | 2.366 | 2.593 | 2.357 |
| 1337     | 2.099 | 2.213 | 2.391 | 2.584 | 2.402 |
| 145      | 2.186 | 2.266 | 2.413 | 2.677 | 2.535 |
| 2895     | 2.254 | 2.381 | 2.524 | 2.713 | 2.51  |
| 12600    | 2.261 | 2.424 | 2.635 | 2.754 | 2.427 |
| 2196     | 2.333 | 2.354 | 2.576 | 2.688 | 2.466 |
| 2931     | 2.378 | 2.411 | 2.537 | 2.693 | 2.521 |
| 15598    | 2.576 | 2.825 | 3.125 | 3.364 | 2.869 |
| 10894    | 2.623 | 2.867 | 3.268 | 3.533 | 2.983 |
| 2844     | 2.672 | 2.816 | 3.069 | 3.315 | 3.087 |
| 196      | 2.804 | 2.954 | 3.137 | 3.426 | 3.154 |
| 497      | 2.939 | 3.106 | 3.354 | 3.562 | 3.284 |
| 1739     | 3.118 | 3.152 | 3.258 | 3.577 | 3.259 |
| 2887     | 3.423 | 3.632 | 3.886 | 3.913 | 3.552 |
| 10869    | 3.667 | 3.89  | 3.956 | 4.567 | 3.983 |



**Supplementary Data 3: Effect of salt concentration (sodium chloride) on biofilm production**

3420      3.689      3.914      3.987      4.324      4.065

### Supplementary Data 4: Effect of glucose concentration on biofilm formation

| <b>Isolates</b> | <b>BHI<br/>(W/-)</b> | <b>Glucose<br/>2%</b> | <b>Glucose<br/>4%</b> | <b>Glucose<br/>8%</b> | <b>Glucose<br/>10%</b> |
|-----------------|----------------------|-----------------------|-----------------------|-----------------------|------------------------|
| 222             | 0.145                | 0.187                 | 0.195                 | 0.296                 | 0.293                  |
| 989             | 0.164                | 0.183                 | 0.201                 | 0.292                 | 0.285                  |
| 1606            | 0.173                | 0.197                 | 0.265                 | 0.315                 | 0.298                  |
| 1249            | 0.186                | 0.206                 | 0.295                 | 0.331                 | 0.32                   |
| 997             | 0.198                | 0.227                 | 0.298                 | 0.346                 | 0.345                  |
| 1250            | 0.2                  | 0.254                 | 0.308                 | 0.354                 | 0.355                  |
| 1929            | 0.201                | 0.259                 | 0.299                 | 0.345                 | 0.341                  |
| 3179            | 0.2168               | 0.262                 | 0.312                 | 0.359                 | 0.354                  |
| 1252            | 0.221                | 0.269                 | 0.331                 | 0.366                 | 0.365                  |
| 1749            | 0.224                | 0.272                 | 0.339                 | 0.375                 | 0.373                  |
| 15288           | 0.236                | 0.279                 | 0.346                 | 0.381                 | 0.379                  |
| 2067            | 0.236                | 0.275                 | 0.345                 | 0.378                 | 0.373                  |
| 1996            | 0.237                | 0.284                 | 0.368                 | 0.387                 | 0.385                  |
| 1220            | 0.243                | 0.289                 | 0.369                 | 0.385                 | 0.38                   |
| 215             | 0.2458               | 0.286                 | 0.372                 | 0.388                 | 0.383                  |
| 6160            | 0.249                | 0.295                 | 0.389                 | 0.421                 | 0.397                  |
| 216             | 0.2518               | 0.302                 | 0.395                 | 0.437                 | 0.432                  |
| 7834            | 0.259                | 0.313                 | 0.398                 | 0.439                 | 0.436                  |
| 2276            | 0.2698               | 0.321                 | 0.396                 | 0.435                 | 0.429                  |
| 4158            | 0.2715               | 0.323                 | 0.392                 | 0.433                 | 0.424                  |
| 8373            | 0.284                | 0.326                 | 0.399                 | 0.442                 | 0.431                  |
| 217             | 0.293                | 0.332                 | 0.411                 | 0.45                  | 0.45                   |
| 4148            | 0.2963               | 0.33                  | 0.415                 | 0.453                 | 0.45                   |
| 7772            | 0.299                | 0.326                 | 0.408                 | 0.448                 | 0.442                  |
| 214             | 0.2995               | 0.335                 | 0.418                 | 0.457                 | 0.455                  |
| 3169            | 0.3028               | 0.341                 | 0.422                 | 0.452                 | 0.448                  |
| 11569           | 0.3048               | 0.339                 | 0.437                 | 0.455                 | 0.452                  |
| 1194            | 0.306                | 0.348                 | 0.442                 | 0.477                 | 0.462                  |
| 2232            | 0.314                | 0.343                 | 0.345                 | 0.481                 | 0.473                  |
| 1607            | 0.318                | 0.346                 | 0.351                 | 0.474                 | 0.47                   |
| 1287            | 0.319                | 0.345                 | 0.357                 | 0.486                 | 0.482                  |
| 2001            | 0.338                | 0.351                 | 0.368                 | 0.492                 | 0.49                   |
| 6211            | 0.348                | 0.357                 | 0.369                 | 0.489                 | 0.488                  |
| 191             | 0.348                | 0.355                 | 0.372                 | 0.487                 | 0.458                  |
| 1074            | 0.352                | 0.363                 | 0.385                 | 0.494                 | 0.463                  |
| 1931            | 0.353                | 0.359                 | 0.392                 | 0.498                 | 0.483                  |
| 8678            | 0.357                | 0.371                 | 0.406                 | 0.513                 | 0.497                  |
| 8               | 0.367                | 0.378                 | 0.419                 | 0.522                 | 0.508                  |
| 213             | 0.3713               | 0.388                 | 0.423                 | 0.535                 | 0.524                  |

| <b>Isolates</b> | <b>BHI<br/>(W/-)</b> | <b>Glucose<br/>2%</b> | <b>Glucose<br/>4%</b> | <b>Glucose<br/>8%</b> | <b>Glucose<br/>10%</b> |
|-----------------|----------------------|-----------------------|-----------------------|-----------------------|------------------------|
|-----------------|----------------------|-----------------------|-----------------------|-----------------------|------------------------|

### Supplementary Data 4: Effect of glucose concentration on biofilm formation

|                 |              |                |                |                |                |
|-----------------|--------------|----------------|----------------|----------------|----------------|
| 14122           | 0.3723       | 0.385          | 0.434          | 0.542          | 0.521          |
| 4079            | 0.3728       | 0.38           | 0.428          | 0.539          | 0.53           |
| 2989            | 0.373        | 0.388          | 0.431          | 0.545          | 0.535          |
| 5993            | 0.374        | 0.386          | 0.435          | 0.541          | 0.537          |
| 15311           | 0.3818       | 0.394          | 0.442          | 0.549          | 0.545          |
| 4008            | 0.392        | 0.411          | 0.448          | 0.553          | 0.55           |
| 12              | 0.394        | 0.417          | 0.445          | 0.551          | 0.55           |
| 6122            | 0.399        | 0.422          | 0.449          | 0.556          | 0.553          |
| 4               | 0.4          | 0.443          | 0.463          | 0.554          | 0.551          |
| 4151            | 0.4105       | 0.446          | 0.458          | 0.557          | 0.554          |
| 11204           | 0.4193       | 0.445          | 0.457          | 0.556          | 0.553          |
| 210             | 0.4208       | 0.449          | 0.466          | 0.551          | 0.485          |
| 1876            | 0.424        | 0.456          | 0.481          | 0.558          | 0.493          |
| 2322            | 0.433        | 0.455          | 0.473          | 0.565          | 0.551          |
| 15255           | 0.4335       | 0.462          | 0.484          | 0.577          | 0.56           |
| 11023           | 0.4373       | 0.468          | 0.482          | 0.583          | 0.564          |
| 2310            | 0.4383       | 0.471          | 0.492          | 0.579          | 0.561          |
| 4073            | 0.4428       | 0.475          | 0.496          | 0.582          | 0.563          |
| 6617            | 0.445        | 0.478          | 0.509          | 0.587          | 0.571          |
| 8547            | 0.455        | 0.475          | 0.511          | 0.584          | 0.566          |
| 6               | 0.4565       | 0.474          | 0.513          | 0.572          | 0.553          |
| 7               | 0.4628       | 0.481          | 0.52           | 0.581          | 0.562          |
| 3990            | 0.47         | 0.489          | 0.528          | 0.586          | 0.573          |
| 2066            | 0.472        | 0.495          | 0.537          | 0.591          | 0.583          |
| 3303            | 0.472        | 0.497          | 0.533          | 0.587          | 0.58           |
| 10533           | 0.473        | 0.491          | 0.539          | 0.593          | 0.586          |
| 4272            | 0.4755       | 0.494          | 0.532          | 0.595          | 0.582          |
| 5               | 0.476        | 0.493          | 0.535          | 0.592          | 0.59           |
| 1886            | 0.477        | 0.511          | 0.542          | 0.591          | 0.581          |
| 3977            | 0.4843       | 0.52           | 0.553          | 0.597          | 0.588          |
| 2187            | 0.4865       | 0.518          | 0.551          | 0.588          | 0.576          |
| 10697           | 0.487        | 0.521          | 0.554          | 0.592          | 0.588          |
| 209             | 0.4873       | 0.522          | 0.558          | 0.591          | 0.589          |
| 4150            | 0.4913       | 0.533          | 0.569          | 0.595          | 0.591          |
| 3707            | 0.496        | 0.539          | 0.568          | 0.598          | 0.593          |
| 1214            | 0.499        | 0.543          | 0.565          | 0.596          | 0.592          |
| 3788            | 0.4998       | 0.545          | 0.569          | 0.597          | 0.593          |
| 192             | 0.501        | 0.549          | 0.576          | 0.605          | 0.59           |
| 7663            | 0.503        | 0.55           | 0.582          | 0.613          | 0.601          |
|                 | <b>BHI</b>   | <b>Glucose</b> | <b>Glucose</b> | <b>Glucose</b> | <b>Glucose</b> |
| <b>Isolates</b> | <b>(W/-)</b> | <b>2%</b>      | <b>4%</b>      | <b>8%</b>      | <b>10%</b>     |
| 1008            | 0.505        | 0.543          | 0.588          | 0.608          | 0.6            |
| 13738           | 0.511        | 0.557          | 0.593          | 0.618          | 0.608          |

### Supplementary Data 4: Effect of glucose concentration on biofilm formation

|                 |                      |                       |                       |                       |                        |
|-----------------|----------------------|-----------------------|-----------------------|-----------------------|------------------------|
| 4179            | 0.516                | 0.554                 | 0.591                 | 0.614                 | 0.603                  |
| 11111           | 0.5238               | 0.568                 | 0.607                 | 0.623                 | 0.606                  |
| 11095           | 0.539                | 0.572                 | 0.614                 | 0.629                 | 0.605                  |
| 13328           | 0.548                | 0.574                 | 0.626                 | 0.637                 | 0.613                  |
| 13409           | 0.5685               | 0.593                 | 0.638                 | 0.654                 | 0.618                  |
| 1922(F)         | 0.573                | 0.598                 | 0.642                 | 0.671                 | 0.63                   |
| 2296            | 0.5735               | 0.595                 | 0.644                 | 0.682                 | 0.638                  |
| 2263            | 0.574                | 0.593                 | 0.646                 | 0.688                 | 0.635                  |
| 4066            | 0.5765               | 0.59                  | 0.651                 | 0.685                 | 0.643                  |
| 6563            | 0.578                | 0.592                 | 0.649                 | 0.679                 | 0.631                  |
| 3906            | 0.58                 | 0.613                 | 0.665                 | 0.689                 | 0.652                  |
| 3357            | 0.5855               | 0.619                 | 0.669                 | 0.682                 | 0.654                  |
| 2               | 0.594                | 0.622                 | 0.673                 | 0.689                 | 0.653                  |
| 13836           | 0.5985               | 0.626                 | 0.675                 | 0.687                 | 0.655                  |
| 9               | 0.6003               | 0.635                 | 0.682                 | 0.692                 | 0.657                  |
| 2359            | 0.6068               | 0.642                 | 0.688                 | 0.696                 | 0.663                  |
| 2359            | 0.6068               | 0.653                 | 0.685                 | 0.695                 | 0.661                  |
| 1609            | 0.624                | 0.657                 | 0.693                 | 0.703                 | 0.672                  |
| 51              | 0.625                | 0.659                 | 0.705                 | 0.718                 | 0.682                  |
| 190             | 0.628                | 0.644                 | 0.669                 | 0.75                  | 0.253                  |
| 11109           | 0.6333               | 0.649                 | 0.672                 | 0.783                 | 0.253                  |
| 1740            | 0.645                | 0.653                 | 0.671                 | 0.782                 | 0.253                  |
| 1972            | 0.653                | 0.66                  | 0.679                 | 0.788                 | 0.253                  |
| 3917            | 0.6563               | 0.662                 | 0.681                 | 0.784                 | 0.253                  |
| 1583            | 0.664                | 0.672                 | 0.684                 | 0.789                 | 0.253                  |
| 14514           | 0.6728               | 0.685                 | 0.725                 | 0.774                 | 0.253                  |
| 3869            | 0.6803               | 0.692                 | 0.723                 | 0.779                 | 0.253                  |
| 2965            | 0.6818               | 0.69                  | 0.727                 | 0.773                 | 0.253                  |
| 2972            | 0.686                | 0.695                 | 0.724                 | 0.781                 | 0.253                  |
| 1974            | 0.693                | 0.725                 | 0.747                 | 0.79                  | 0.253                  |
| 12027           | 0.6938               | 0.718                 | 0.732                 | 0.786                 | 0.253                  |
| 10              | 0.6968               | 0.722                 | 0.743                 | 0.788                 | 0.253                  |
| 11600           | 0.7                  | 0.726                 | 0.753                 | 0.784                 | 0.253                  |
| 4268            | 0.7098               | 0.719                 | 0.745                 | 0.775                 | 0.253                  |
| 3294            | 0.712                | 0.733                 | 0.759                 | 0.786                 | 0.253                  |
| 200             | 0.714                | 0.724                 | 0.767                 | 0.792                 | 0.253                  |
| 2822            | 0.716                | 0.722                 | 0.764                 | 0.797                 | 0.253                  |
| <b>Isolates</b> | <b>BHI<br/>(W/-)</b> | <b>Glucose<br/>2%</b> | <b>Glucose<br/>4%</b> | <b>Glucose<br/>8%</b> | <b>Glucose<br/>10%</b> |
| 193             | 0.722                | 0.736                 | 0.772                 | 0.81                  | 0.253                  |
| 14310           | 0.7248               | 0.738                 | 0.763                 | 0.793                 | 0.253                  |
| 993             | 0.733                | 0.742                 | 0.776                 | 0.803                 | 0.253                  |
| 4182            | 0.738                | 0.745                 | 0.771                 | 0.804                 | 0.253                  |

### Supplementary Data 4: Effect of glucose concentration on biofilm formation

|                 |              |                |                |                |                |
|-----------------|--------------|----------------|----------------|----------------|----------------|
| 1772            | 0.74         | 0.753          | 0.779          | 0.824          | 0.253          |
| 4067            | 0.7545       | 0.769          | 0.783          | 0.833          | 0.253          |
| 2204/2294       | 0.761        | 0.773          | 0.788          | 0.828          | 0.253          |
| 2517            | 0.764        | 0.764          | 0.773          | 0.816          | 0.253          |
| 2190            | 0.764        | 0.773          | 0.796          | 0.823          | 0.253          |
| 3811            | 0.7658       | 0.779          | 0.803          | 0.834          | 0.253          |
| 11040           | 0.766        | 0.782          | 0.814          | 0.846          | 0.253          |
| 1315            | 0.767        | 0.777          | 0.799          | 0.828          | 0.253          |
| 9607            | 0.773        | 0.794          | 0.817          | 0.833          | 0.253          |
| 7877            | 0.775        | 0.801          | 0.825          | 0.848          | 0.253          |
| 1               | 0.777        | 0.807          | 0.819          | 0.853          | 0.253          |
| 2551            | 0.779        | 0.81           | 0.828          | 0.851          | 0.253          |
| 14730           | 0.8078       | 0.815          | 0.831          | 0.866          | 0.253          |
| 3022            | 0.8125       | 0.83           | 0.863          | 0.891          | 0.253          |
| 7520            | 0.817        | 0.822          | 0.855          | 0.886          | 0.253          |
| 198             | 0.827        | 0.837          | 0.861          | 0.893          | 0.253          |
| 3807            | 0.8315       | 0.841          | 0.859          | 0.884          | 0.253          |
| 194             | 0.832        | 0.848          | 0.866          | 0.892          | 0.253          |
| 3293            | 0.8335       | 0.844          | 0.863          | 0.885          | 0.253          |
| 2070            | 0.8533       | 0.871          | 0.893          | 0.921          | 0.253          |
| 3               | 0.8568       | 0.875          | 0.897          | 0.931          | 0.253          |
| 1882            | 0.862        | 0.882          | 0.924          | 0.953          | 0.253          |
| 7327            | 0.862        | 0.887          | 0.932          | 0.961          | 0.253          |
| 12110           | 0.8693       | 0.883          | 0.924          | 0.955          | 0.253          |
| 8315            | 0.884        | 0.925          | 0.958          | 0.983          | 0.253          |
| 14842           | 0.8865       | 0.921          | 0.952          | 0.975          | 0.253          |
| 4840            | 0.888        | 0.928          | 0.956          | 0.986          | 0.253          |
| 8301            | 0.9          | 0.924          | 0.95           | 0.983          | 0.253          |
| 14696           | 0.9018       | 0.927          | 0.948          | 0.973          | 0.253          |
| 8342            | 0.905        | 0.925          | 0.955          | 0.984          | 0.253          |
| 2171            | 0.905        | 0.927          | 0.958          | 0.981          | 0.253          |
| 9032            | 0.908        | 0.923          | 0.951          | 0.976          | 0.253          |
| 2485            | 0.9193       | 0.928          | 0.966          | 0.993          | 0.253          |
| 14881           | 0.9263       | 0.935          | 0.962          | 0.985          | 0.253          |
| 3557            | 0.9313       | 0.946          | 0.977          | 0.993          | 0.253          |
|                 | <b>BHI</b>   | <b>Glucose</b> | <b>Glucose</b> | <b>Glucose</b> | <b>Glucose</b> |
| <b>Isolates</b> | <b>(W/-)</b> | <b>2%</b>      | <b>4%</b>      | <b>8%</b>      | <b>10%</b>     |
| 4020            | 0.957        | 0.967          | 0.984          | 1.021          | 0.253          |
| 4289            | 0.9628       | 0.973          | 0.983          | 1.028          | 0.253          |
| 4238            | 0.963        | 0.968          | 0.988          | 1.025          | 0.253          |
| 12998           | 0.9638       | 0.977          | 0.991          | 1.056          | 0.253          |
| 3248            | 0.9693       | 0.976          | 1.019          | 1.103          | 0.253          |
| 11              | 0.97         | 0.985          | 1.119          | 1.137          | 0.253          |

### Supplementary Data 4: Effect of glucose concentration on biofilm formation

|                 |                      |                       |                       |                       |                        |
|-----------------|----------------------|-----------------------|-----------------------|-----------------------|------------------------|
| 10915           | 0.972                | 0.979                 | 1.103                 | 1.134                 | 0.253                  |
| 3830            | 0.9758               | 0.982                 | 1.111                 | 1.138                 | 0.253                  |
| 9517            | 1.005                | 1.109                 | 1.139                 | 1.165                 | 0.253                  |
| 2717            | 1.012                | 1.11                  | 1.148                 | 1.172                 | 0.253                  |
| 9972            | 1.026                | 1.172                 | 1.208                 | 1.286                 | 0.253                  |
| 15724           | 1.042                | 1.165                 | 1.197                 | 1.254                 | 0.253                  |
| 8571            | 1.058                | 1.177                 | 1.213                 | 1.279                 | 0.253                  |
| 1318            | 1.085                | 1.18                  | 1.224                 | 1.281                 | 0.253                  |
| 2825            | 1.091                | 1.169                 | 1.217                 | 1.273                 | 0.253                  |
| 12084           | 1.119                | 1.192                 | 1.269                 | 1.334                 | 0.253                  |
| 10046           | 1.143                | 1.187                 | 1.254                 | 1.331                 | 0.253                  |
| 13423           | 1.147                | 1.196                 | 1.273                 | 1.358                 | 0.253                  |
| 1313            | 1.156                | 1.191                 | 1.264                 | 1.347                 | 0.253                  |
| 3160            | 1.156                | 1.203                 | 1.281                 | 1.366                 | 0.253                  |
| 4059            | 1.157                | 1.2                   | 1.258                 | 1.361                 | 0.253                  |
| 6752            | 1.163                | 1.233                 | 1.284                 | 1.355                 | 0.253                  |
| 4073            | 1.169                | 1.231                 | 1.281                 | 1.37                  | 0.253                  |
| 14944           | 1.185                | 1.25                  | 1.292                 | 1.386                 | 0.253                  |
| 14735           | 1.186                | 1.258                 | 1.287                 | 1.392                 | 0.253                  |
| 2164            | 1.187                | 1.246                 | 1.283                 | 1.377                 | 0.253                  |
| 2700            | 1.195                | 1.263                 | 1.295                 | 1.395                 | 0.253                  |
| 10723           | 1.216                | 1.282                 | 1.347                 | 1.402                 | 0.253                  |
| 3398            | 1.225                | 1.276                 | 1.354                 | 1.389                 | 0.253                  |
| 1210            | 1.226                | 1.2803                | 1.351                 | 1.391                 | 0.253                  |
| 212             | 1.24                 | 1.291                 | 1.373                 | 1.407                 | 0.253                  |
| 10825           | 1.25                 | 1.296                 | 1.394                 | 1.5                   | 0.253                  |
| 3724            | 1.269                | 1.305                 | 1.41                  | 1.544                 | 0.253                  |
| 3652            | 1.279                | 1.295                 | 1.391                 | 1.52                  | 0.253                  |
| 201             | 1.279                | 1.302                 | 1.413                 | 1.56                  | 0.253                  |
| 7884            | 1.282                | 1.307                 | 1.425                 | 1.554                 | 0.253                  |
| 15718           | 1.298                | 1.314                 | 1.433                 | 1.621                 | 0.253                  |
| 14513           | 1.311                | 1.341                 | 1.427                 | 1.614                 | 0.253                  |
| 6585            | 1.329                | 1.355                 | 1.454                 | 1.627                 | 0.253                  |
| <b>Isolates</b> | <b>BHI<br/>(W/-)</b> | <b>Glucose<br/>2%</b> | <b>Glucose<br/>4%</b> | <b>Glucose<br/>8%</b> | <b>Glucose<br/>10%</b> |
| 15521           | 1.33                 | 1.39                  | 1.51                  | 1.66                  | 0.253                  |
| 2503            | 1.339                | 1.367                 | 1.449                 | 1.589                 | 0.253                  |
| 1309            | 1.341                | 1.382                 | 1.468                 | 1.582                 | 0.253                  |
| 2173            | 1.351                | 1.389                 | 1.529                 | 1.601                 | 0.253                  |
| 3709            | 1.371                | 1.403                 | 1.554                 | 1.634                 | 0.253                  |
| 2498            | 1.392                | 1.431                 | 1.59                  | 1.662                 | 0.253                  |
| 1834            | 1.398                | 1.442                 | 1.62                  | 1.668                 | 0.253                  |
| 10807           | 1.408                | 1.468                 | 1.634                 | 1.679                 | 0.253                  |

### Supplementary Data 4: Effect of glucose concentration on biofilm formation

|                 |              |                |                |                |                |
|-----------------|--------------|----------------|----------------|----------------|----------------|
| 195             | 1.43         | 1.492          | 1.652          | 1.683          | 0.253          |
| 13657           | 1.454        | 1.502          | 1.648          | 1.688          | 0.253          |
| 4299            | 1.488        | 1.521          | 1.657          | 1.675          | 0.253          |
| 8436            | 1.51         | 1.564          | 1.678          | 1.693          | 0.253          |
| 10101           | 1.525        | 1.582          | 1.691          | 1.722          | 0.253          |
| 13797           | 1.525        | 1.578          | 1.685          | 1.711          | 0.253          |
| 13059           | 1.543        | 1.603          | 1.694          | 1.756          | 0.253          |
| 13603           | 1.553        | 1.612          | 1.683          | 1.759          | 0.253          |
| 14478           | 1.565        | 1.62           | 1.691          | 1.763          | 0.253          |
| 1338            | 1.571        | 1.608          | 1.657          | 1.725          | 0.253          |
| 3362            | 1.585        | 1.625          | 1.668          | 1.736          | 0.253          |
| 2588            | 1.59         | 1.617          | 1.673          | 1.755          | 0.253          |
| 12497           | 1.597        | 1.622          | 1.693          | 1.766          | 0.253          |
| 197             | 1.602        | 1.63           | 1.682          | 1.745          | 0.253          |
| 2056(PA)        | 1.632        | 1.652          | 1.698          | 1.783          | 0.253          |
| 13306           | 1.641        | 1.682          | 1.708          | 1.795          | 0.253          |
| Sim             | 1.655        | 1.677          | 1.713          | 1.812          | 0.253          |
| 14068           | 1.674        | 1.691          | 1.724          | 1.832          | 0.253          |
| 1922 R          | 1.675        | 1.685          | 1.715          | 1.824          | 0.253          |
| 1240            | 1.682        | 1.697          | 1.722          | 1.817          | 0.253          |
| 12566           | 1.693        | 1.723          | 1.766          | 1.885          | 0.253          |
| 12617           | 1.752        | 1.812          | 1.873          | 1.921          | 0.253          |
| 2187            | 1.756        | 1.783          | 1.825          | 1.893          | 0.253          |
| 10872           | 1.757        | 1.82           | 1.884          | 1.915          | 0.253          |
| 3415            | 1.758        | 1.812          | 1.857          | 1.896          | 0.253          |
| 4227            | 1.762        | 1.828          | 1.866          | 1.902          | 0.253          |
| 14350           | 1.775        | 1.864          | 1.892          | 1.956          | 0.253          |
| 3593            | 1.802        | 1.841          | 1.877          | 1.912          | 0.253          |
| 3690            | 1.811        | 1.856          | 1.891          | 1.945          | 0.253          |
| 2010            | 1.842        | 1.891          | 1.934          | 1.966          | 0.253          |
| 14345           | 1.864        | 1.911          | 1.956          | 2.051          | 0.253          |
|                 | <b>BHI</b>   | <b>Glucose</b> | <b>Glucose</b> | <b>Glucose</b> | <b>Glucose</b> |
| <b>Isolates</b> | <b>(W/-)</b> | <b>2%</b>      | <b>4%</b>      | <b>8%</b>      | <b>10%</b>     |
| 13962           | 1.864        | 1.907          | 1.949          | 2.132          | 0.253          |
| 10088           | 1.874        | 1.915          | 1.961          | 2.117          | 0.253          |
| 14203           | 1.886        | 1.921          | 1.958          | 2.122          | 0.253          |
| 6708            | 1.893        | 1.916          | 1.952          | 2.105          | 0.253          |
| 10012           | 1.903        | 2.12           | 2.358          | 2.547          | 0.253          |
| 2086            | 1.985        | 2.107          | 2.324          | 2.531          | 0.253          |
| 15603           | 2.011        | 2.268          | 2.422          | 2.685          | 0.253          |
| 2138            | 2.089        | 2.155          | 2.366          | 2.593          | 0.253          |
| 1337            | 2.099        | 2.213          | 2.391          | 2.584          | 0.253          |
| 145             | 2.186        | 2.266          | 2.413          | 2.677          | 0.253          |

#### Supplementary Data 4: Effect of glucose concentration on biofilm formation

|       |       |       |       |       |       |
|-------|-------|-------|-------|-------|-------|
| 2895  | 2.254 | 2.381 | 2.524 | 2.713 | 0.253 |
| 12600 | 2.261 | 2.424 | 2.635 | 2.754 | 0.253 |
| 2196  | 2.333 | 2.354 | 2.576 | 2.688 | 0.253 |
| 2931  | 2.378 | 2.411 | 2.537 | 2.693 | 0.253 |
| 15598 | 2.576 | 2.825 | 3.125 | 3.364 | 0.253 |
| 10894 | 2.623 | 2.867 | 3.268 | 3.533 | 0.253 |
| 2844  | 2.672 | 2.816 | 3.069 | 3.315 | 0.253 |
| 196   | 2.804 | 2.954 | 3.137 | 3.426 | 0.253 |
| 497   | 2.939 | 3.106 | 3.354 | 3.562 | 0.253 |
| 1739  | 3.118 | 3.152 | 3.258 | 3.577 | 0.253 |
| 2887  | 3.423 | 3.632 | 3.886 | 3.913 | 0.253 |
| 10869 | 3.667 | 3.89  | 3.956 | 4.567 | 0.253 |
| 3420  | 3.689 | 3.914 | 3.987 | 4.324 | 0.253 |



### Supplementary Data 5: Effect of amino acids on biofilm formation

| <b>Isolates</b> | <b>BHI (W/-)</b> | <b>Met 2 mM</b> | <b>Met 4 mM</b> | <b>Met 8 mM</b> | <b>Met 10 mM</b> | <b>SAM 5 mM</b> | <b>SAM 10 mM</b> | <b>SAM 15 mM</b> | <b>SAM 20 mM</b> |
|-----------------|------------------|-----------------|-----------------|-----------------|------------------|-----------------|------------------|------------------|------------------|
| 222             | 0.145            | 0.159           | 0.184           | 0.266           | 0.272            | 0.168           | 0.195            | 0.277            | 0.298            |
| 989             | 0.164            | 0.175           | 0.208           | 0.273           | 0.281            | 0.189           | 0.216            | 0.295            | 0.315            |
| 1606            | 0.173            | 0.186           | 0.231           | 0.285           | 0.294            | 0.195           | 0.269            | 0.316            | 0.327            |
| 1249            | 0.186            | 0.196           | 0.267           | 0.313           | 0.319            | 0.216           | 0.297            | 0.323            | 0.335            |
| 997             | 0.198            | 0.216           | 0.285           | 0.335           | 0.343            | 0.227           | 0.298            | 0.346            | 0.357            |
| 1250            | 0.2              | 0.223           | 0.294           | 0.334           | 0.339            | 0.231           | 0.303            | 0.344            | 0.354            |
| 1929            | 0.201            | 0.238           | 0.292           | 0.347           | 0.352            | 0.243           | 0.296            | 0.351            | 0.359            |
| 3179            | 0.2168           | 0.245           | 0.316           | 0.363           | 0.364            | 0.257           | 0.315            | 0.375            | 0.379            |
| 1252            | 0.221            | 0.259           | 0.324           | 0.375           | 0.376            | 0.266           | 0.338            | 0.388            | 0.385            |
| 1749            | 0.224            | 0.274           | 0.335           | 0.379           | 0.377            | 0.279           | 0.359            | 0.399            | 0.397            |
| 15288           | 0.236            | 0.285           | 0.346           | 0.383           | 0.38             | 0.291           | 0.373            | 0.411            | 0.405            |
| 2067            | 0.236            | 0.292           | 0.345           | 0.385           | 0.383            | 0.295           | 0.385            | 0.415            | 0.403            |
| 1996            | 0.237            | 0.291           | 0.368           | 0.389           | 0.385            | 0.284           | 0.356            | 0.392            | 0.395            |
| 1220            | 0.243            | 0.292           | 0.375           | 0.386           | 0.38             | 0.289           | 0.382            | 0.416            | 0.39             |
| 215             | 0.2458           | 0.285           | 0.369           | 0.398           | 0.395            | 0.295           | 0.383            | 0.406            | 0.401            |
| 6160            | 0.249            | 0.297           | 0.375           | 0.414           | 0.402            | 0.305           | 0.395            | 0.427            | 0.408            |
| 216             | 0.2518           | 0.305           | 0.391           | 0.427           | 0.412            | 0.314           | 0.395            | 0.436            | 0.414            |
| 7834            | 0.259            | 0.314           | 0.399           | 0.435           | 0.417            | 0.319           | 0.398            | 0.431            | 0.416            |
| 2276            | 0.2698           | 0.327           | 0.406           | 0.443           | 0.44             | 0.335           | 0.414            | 0.452            | 0.42             |
| 4158            | 0.2715           | 0.331           | 0.392           | 0.436           | 0.425            | 0.339           | 0.405            | 0.441            | 0.425            |
| 8373            | 0.284            | 0.338           | 0.411           | 0.446           | 0.435            | 0.347           | 0.416            | 0.449            | 0.429            |
| 217             | 0.293            | 0.342           | 0.415           | 0.445           | 0.431            | 0.345           | 0.422            | 0.45             | 0.427            |
| 4148            | 0.2963           | 0.335           | 0.408           | 0.441           | 0.422            | 0.342           | 0.429            | 0.458            | 0.432            |
| 7772            | 0.299            | 0.332           | 0.403           | 0.437           | 0.418            | 0.347           | 0.425            | 0.453            | 0.425            |
| 214             | 0.2995           | 0.329           | 0.416           | 0.448           | 0.421            | 0.335           | 0.425            | 0.459            | 0.432            |
| 3169            | 0.3028           | 0.336           | 0.425           | 0.447           | 0.423            | 0.345           | 0.436            | 0.457            | 0.425            |
| 11569           | 0.3048           | 0.349           | 0.434           | 0.452           | 0.428            | 0.352           | 0.442            | 0.465            | 0.424            |
| 1194            | 0.306            | 0.352           | 0.447           | 0.479           | 0.433            | 0.363           | 0.456            | 0.489            | 0.435            |
| 2232            | 0.314            | 0.344           | 0.435           | 0.483           | 0.43             | 0.349           | 0.445            | 0.496            | 0.431            |
| 1607            | 0.318            | 0.342           | 0.439           | 0.489           | 0.437            | 0.355           | 0.357            | 0.498            | 0.448            |
| 1287            | 0.319            | 0.341           | 0.443           | 0.485           | 0.435            | 0.349           | 0.458            | 0.494            | 0.445            |
| 2001            | 0.338            | 0.348           | 0.453           | 0.494           | 0.439            | 0.357           | 0.468            | 0.504            | 0.453            |
| 6211            | 0.348            | 0.359           | 0.469           | 0.507           | 0.445            | 0.365           | 0.478            | 0.517            | 0.458            |
| 191             | 0.348            | 0.365           | 0.476           | 0.513           | 0.448            | 0.375           | 0.483            | 0.524            | 0.458            |
| 1074            | 0.352            | 0.369           | 0.484           | 0.522           | 0.453            | 0.376           | 0.495            | 0.537            | 0.461            |
| 1931            | 0.353            | 0.354           | 0.482           | 0.517           | 0.451            | 0.367           | 0.489            | 0.535            | 0.465            |
| 8678            | 0.357            | 0.367           | 0.429           | 0.497           | 0.425            | 0.381           | 0.456            | 0.529            | 0.466            |
| 8               | 0.367            | 0.371           | 0.433           | 0.512           | 0.438            | 0.398           | 0.468            | 0.532            | 0.468            |
| 213             | 0.3713           | 0.389           | 0.445           | 0.538           | 0.445            | 0.397           | 0.458            | 0.553            | 0.472            |
| <b>Isolates</b> | <b>BHI (W/-)</b> | <b>Met 2 mM</b> | <b>Met 4 mM</b> | <b>Met 8 mM</b> | <b>Met 10 mM</b> | <b>SAM 5 mM</b> | <b>SAM 10 mM</b> | <b>SAM 15 mM</b> | <b>SAM 20 mM</b> |

### Supplementary Data 5: Effect of amino acids on biofilm formation

|                 |              |             |             |             |              |             |              |              |              |
|-----------------|--------------|-------------|-------------|-------------|--------------|-------------|--------------|--------------|--------------|
| 14122           | 0.3723       | 0.382       | 0.441       | 0.525       | 0.431        | 0.395       | 0.472        | 0.545        | 0.475        |
| 4079            | 0.3728       | 0.385       | 0.438       | 0.529       | 0.43         | 0.393       | 0.457        | 0.543        | 0.48         |
| 2989            | 0.373        | 0.389       | 0.437       | 0.537       | 0.435        | 0.395       | 0.454        | 0.547        | 0.485        |
| 5993            | 0.374        | 0.395       | 0.444       | 0.547       | 0.441        | 0.398       | 0.468        | 0.557        | 0.488        |
| 15311           | 0.3818       | 0.393       | 0.446       | 0.543       | 0.445        | 0.397       | 0.465        | 0.552        | 0.485        |
| 4008            | 0.392        | 0.412       | 0.445       | 0.538       | 0.452        | 0.419       | 0.468        | 0.558        | 0.485        |
| 12              | 0.394        | 0.416       | 0.443       | 0.548       | 0.455        | 0.425       | 0.463        | 0.564        | 0.489        |
| 6122            | 0.399        | 0.425       | 0.452       | 0.558       | 0.457        | 0.432       | 0.465        | 0.567        | 0.483        |
| 4               | 0.4          | 0.437       | 0.461       | 0.561       | 0.452        | 0.455       | 0.476        | 0.583        | 0.485        |
| 4151            | 0.4105       | 0.442       | 0.465       | 0.567       | 0.452        | 0.453       | 0.465        | 0.579        | 0.482        |
| 11204           | 0.4193       | 0.447       | 0.459       | 0.563       | 0.455        | 0.459       | 0.472        | 0.575        | 0.485        |
| 210             | 0.4208       | 0.451       | 0.468       | 0.562       | 0.461        | 0.465       | 0.479        | 0.577        | 0.493        |
| 1876            | 0.424        | 0.455       | 0.475       | 0.568       | 0.465        | 0.468       | 0.486        | 0.582        | 0.491        |
| 2322            | 0.433        | 0.453       | 0.471       | 0.558       | 0.455        | 0.464       | 0.481        | 0.577        | 0.486        |
| 15255           | 0.4335       | 0.459       | 0.478       | 0.573       | 0.463        | 0.467       | 0.489        | 0.586        | 0.49         |
| 11023           | 0.4373       | 0.465       | 0.481       | 0.582       | 0.465        | 0.478       | 0.495        | 0.593        | 0.495        |
| 2310            | 0.4383       | 0.472       | 0.493       | 0.578       | 0.468        | 0.483       | 0.511        | 0.586        | 0.492        |
| 4073            | 0.4428       | 0.475       | 0.498       | 0.585       | 0.471        | 0.485       | 0.518        | 0.596        | 0.495        |
| 6617            | 0.445        | 0.479       | 0.508       | 0.593       | 0.475        | 0.486       | 0.524        | 0.617        | 0.501        |
| 8547            | 0.455        | 0.483       | 0.518       | 0.596       | 0.478        | 0.493       | 0.529        | 0.617        | 0.505        |
| 6               | 0.4565       | 0.487       | 0.515       | 0.592       | 0.475        | 0.494       | 0.525        | 0.613        | 0.51         |
| 7               | 0.4628       | 0.485       | 0.522       | 0.588       | 0.482        | 0.492       | 0.527        | 0.598        | 0.515        |
| 3990            | 0.47         | 0.488       | 0.529       | 0.585       | 0.485        | 0.497       | 0.531        | 0.608        | 0.514        |
| 2066            | 0.472        | 0.492       | 0.535       | 0.593       | 0.487        | 0.498       | 0.545        | 0.613        | 0.517        |
| 3303            | 0.472        | 0.498       | 0.538       | 0.595       | 0.485        | 0.508       | 0.551        | 0.618        | 0.515        |
| 10533           | 0.473        | 0.495       | 0.537       | 0.588       | 0.491        | 0.498       | 0.549        | 0.597        | 0.506        |
| 4272            | 0.4755       | 0.497       | 0.539       | 0.592       | 0.485        | 0.505       | 0.545        | 0.608        | 0.511        |
| 5               | 0.476        | 0.492       | 0.533       | 0.585       | 0.488        | 0.508       | 0.549        | 0.615        | 0.515        |
| 1886            | 0.477        | 0.515       | 0.547       | 0.595       | 0.492        | 0.527       | 0.559        | 0.612        | 0.519        |
| 3977            | 0.4843       | 0.521       | 0.552       | 0.598       | 0.495        | 0.532       | 0.565        | 0.619        | 0.515        |
| 2187            | 0.4865       | 0.517       | 0.555       | 0.593       | 0.499        | 0.528       | 0.568        | 0.611        | 0.521        |
| 10697           | 0.487        | 0.523       | 0.559       | 0.598       | 0.502        | 0.532       | 0.577        | 0.623        | 0.525        |
| 209             | 0.4873       | 0.519       | 0.547       | 0.585       | 0.493        | 0.535       | 0.565        | 0.612        | 0.518        |
| 4150            | 0.4913       | 0.528       | 0.558       | 0.597       | 0.501        | 0.539       | 0.576        | 0.619        | 0.524        |
| 3707            | 0.496        | 0.535       | 0.565       | 0.595       | 0.505        | 0.542       | 0.585        | 0.625        | 0.529        |
| 1214            | 0.499        | 0.546       | 0.568       | 0.592       | 0.511        | 0.554       | 0.576        | 0.613        | 0.532        |
| 3788            | 0.4998       | 0.549       | 0.575       | 0.605       | 0.515        | 0.558       | 0.585        | 0.624        | 0.537        |
| 192             | 0.501        | 0.553       | 0.579       | 0.604       | 0.517        | 0.563       | 0.587        | 0.619        | 0.535        |
| 7663            | 0.503        | 0.559       | 0.588       | 0.615       | 0.521        | 0.567       | 0.596        | 0.628        | 0.542        |
|                 | <b>BHI</b>   | <b>Met</b>  | <b>Met</b>  | <b>Met</b>  | <b>Met</b>   | <b>SAM</b>  | <b>SAM</b>   | <b>SAM</b>   | <b>SAM</b>   |
| <b>Isolates</b> | <b>(W/-)</b> | <b>2 mM</b> | <b>4 mM</b> | <b>8 mM</b> | <b>10 mM</b> | <b>5 mM</b> | <b>10 mM</b> | <b>15 mM</b> | <b>20 mM</b> |
| 1008            | 0.505        | 0.547       | 0.575       | 0.604       | 0.516        | 0.561       | 0.589        | 0.622        | 0.546        |
| 13738           | 0.511        | 0.552       | 0.582       | 0.613       | 0.511        | 0.569       | 0.598        | 0.625        | 0.551        |

### Supplementary Data 5: Effect of amino acids on biofilm formation

|                 |              |            |            |            |            |            |            |            |            |
|-----------------|--------------|------------|------------|------------|------------|------------|------------|------------|------------|
| 4179            | 0.516        | 0.562      | 0.593      | 0.615      | 0.515      | 0.578      | 0.605      | 0.628      | 0.554      |
| 11111           | 0.5238       | 0.569      | 0.605      | 0.628      | 0.521      | 0.585      | 0.613      | 0.638      | 0.557      |
| 11095           | 0.539        | 0.575      | 0.619      | 0.637      | 0.528      | 0.588      | 0.628      | 0.648      | 0.56       |
| 13328           | 0.548        | 0.579      | 0.629      | 0.635      | 0.525      | 0.592      | 0.642      | 0.653      | 0.565      |
| 13409           | 0.5685       | 0.595      | 0.639      | 0.658      | 0.528      | 0.604      | 0.653      | 0.676      | 0.568      |
| 1922(F)         | 0.573        | 0.592      | 0.637      | 0.661      | 0.53       | 0.605      | 0.651      | 0.678      | 0.572      |
| 2296            | 0.5735       | 0.598      | 0.645      | 0.678      | 0.538      | 0.611      | 0.659      | 0.689      | 0.575      |
| 2263            | 0.574        | 0.585      | 0.627      | 0.669      | 0.526      | 0.599      | 0.645      | 0.683      | 0.569      |
| 4066            | 0.5765       | 0.591      | 0.641      | 0.673      | 0.532      | 0.607      | 0.664      | 0.697      | 0.585      |
| 6563            | 0.578        | 0.595      | 0.665      | 0.685      | 0.535      | 0.613      | 0.683      | 0.705      | 0.577      |
| 3906            | 0.58         | 0.615      | 0.665      | 0.681      | 0.538      | 0.626      | 0.689      | 0.709      | 0.579      |
| 3357            | 0.5855       | 0.607      | 0.654      | 0.673      | 0.531      | 0.617      | 0.672      | 0.685      | 0.585      |
| 2               | 0.594        | 0.621      | 0.675      | 0.693      | 0.536      | 0.632      | 0.685      | 0.712      | 0.584      |
| 13836           | 0.5985       | 0.625      | 0.672      | 0.696      | 0.539      | 0.637      | 0.689      | 0.706      | 0.587      |
| 9               | 0.6003       | 0.633      | 0.685      | 0.707      | 0.545      | 0.646      | 0.696      | 0.718      | 0.593      |
| 2359            | 0.6068       | 0.638      | 0.675      | 0.698      | 0.541      | 0.649      | 0.688      | 0.702      | 0.595      |
| 2359            | 0.6068       | 0.644      | 0.675      | 0.695      | 0.545      | 0.659      | 0.692      | 0.705      | 0.602      |
| 1609            | 0.624        | 0.652      | 0.682      | 0.693      | 0.548      | 0.665      | 0.693      | 0.712      | 0.605      |
| 51              | 0.625        | 0.658      | 0.697      | 0.716      | 0.552      | 0.673      | 0.712      | 0.729      | 0.612      |
| 190             | 0.628        | 0.661      | 0.715      | 0.738      | 0.564      | 0.674      | 0.727      | 0.755      | 0.619      |
| 11109           | 0.6333       | 0.667      | 0.726      | 0.747      | 0.573      | 0.676      | 0.737      | 0.762      | 0.626      |
| 1740            | 0.645        | 0.669      | 0.728      | 0.753      | 0.575      | 0.682      | 0.744      | 0.765      | 0.625      |
| 1972            | 0.653        | 0.675      | 0.731      | 0.758      | 0.575      | 0.687      | 0.748      | 0.772      | 0.628      |
| 3917            | 0.6563       | 0.671      | 0.725      | 0.744      | 0.578      | 0.688      | 0.739      | 0.779      | 0.632      |
| 1583            | 0.664        | 0.673      | 0.734      | 0.759      | 0.585      | 0.691      | 0.755      | 0.786      | 0.63       |
| 14514           | 0.6728       | 0.682      | 0.741      | 0.773      | 0.592      | 0.695      | 0.755      | 0.791      | 0.637      |
| 3869            | 0.6803       | 0.687      | 0.747      | 0.788      | 0.598      | 0.707      | 0.762      | 0.805      | 0.641      |
| 2965            | 0.6818       | 0.695      | 0.756      | 0.792      | 0.608      | 0.715      | 0.784      | 0.826      | 0.645      |
| 2972            | 0.686        | 0.708      | 0.779      | 0.826      | 0.605      | 0.718      | 0.786      | 0.835      | 0.642      |
| 1974            | 0.693        | 0.724      | 0.783      | 0.832      | 0.603      | 0.736      | 0.795      | 0.842      | 0.648      |
| 12027           | 0.6938       | 0.725      | 0.789      | 0.839      | 0.605      | 0.734      | 0.806      | 0.851      | 0.652      |
| 10              | 0.6968       | 0.722      | 0.785      | 0.845      | 0.607      | 0.736      | 0.809      | 0.847      | 0.658      |
| 11600           | 0.7          | 0.728      | 0.792      | 0.858      | 0.609      | 0.737      | 0.814      | 0.867      | 0.663      |
| 4268            | 0.7098       | 0.726      | 0.785      | 0.853      | 0.614      | 0.735      | 0.807      | 0.855      | 0.665      |
| 3294            | 0.712        | 0.733      | 0.792      | 0.874      | 0.612      | 0.744      | 0.796      | 0.888      | 0.668      |
| 200             | 0.714        | 0.737      | 0.789      | 0.877      | 0.615      | 0.748      | 0.795      | 0.893      | 0.673      |
| 2822            | 0.716        | 0.735      | 0.781      | 0.882      | 0.615      | 0.745      | 0.798      | 0.895      | 0.677      |
|                 | <b>BHI</b>   | <b>Met</b> | <b>Met</b> | <b>Met</b> | <b>Met</b> | <b>SAM</b> | <b>SAM</b> | <b>SAM</b> | <b>SAM</b> |
| <b>Isolates</b> | <b>(W/-)</b> | <b>2%</b>  | <b>4%</b>  | <b>8%</b>  | <b>10%</b> | <b>2%</b>  | <b>4%</b>  | <b>8%</b>  | <b>10%</b> |
| 193             | 0.722        | 0.744      | 0.795      | 0.887      | 0.618      | 0.749      | 0.798      | 0.895      | 0.68       |
| 14310           | 0.7248       | 0.742      | 0.787      | 0.885      | 0.62       | 0.748      | 0.795      | 0.907      | 0.685      |
| 993             | 0.733        | 0.753      | 0.797      | 0.897      | 0.624      | 0.758      | 0.807      | 0.915      | 0.688      |
| 4182            | 0.738        | 0.755      | 0.794      | 0.895      | 0.625      | 0.762      | 0.811      | 0.924      | 0.686      |

### Supplementary Data 5: Effect of amino acids on biofilm formation

|                 |              |             |             |             |              |             |              |              |              |
|-----------------|--------------|-------------|-------------|-------------|--------------|-------------|--------------|--------------|--------------|
| 1772            | 0.74         | 0.761       | 0.805       | 0.907       | 0.628        | 0.772       | 0.819        | 0.928        | 0.683        |
| 4067            | 0.7545       | 0.768       | 0.821       | 0.92        | 0.636        | 0.782       | 0.835        | 0.932        | 0.689        |
| 2204/2294       | 0.761        | 0.782       | 0.843       | 0.935       | 0.642        | 0.793       | 0.855        | 0.941        | 0.695        |
| 2517            | 0.764        | 0.786       | 0.841       | 0.933       | 0.645        | 0.795       | 0.853        | 0.938        | 0.697        |
| 2190            | 0.764        | 0.789       | 0.845       | 0.938       | 0.642        | 0.797       | 0.855        | 0.943        | 0.695        |
| 3811            | 0.7658       | 0.785       | 0.842       | 0.932       | 0.639        | 0.802       | 0.856        | 0.947        | 0.704        |
| 11040           | 0.766        | 0.789       | 0.848       | 0.937       | 0.646        | 0.798       | 0.859        | 0.955        | 0.702        |
| 1315            | 0.767        | 0.787       | 0.851       | 0.943       | 0.648        | 0.808       | 0.863        | 0.959        | 0.705        |
| 9607            | 0.773        | 0.793       | 0.855       | 0.945       | 0.645        | 0.813       | 0.865        | 0.963        | 0.705        |
| 7877            | 0.775        | 0.792       | 0.859       | 0.948       | 0.652        | 0.807       | 0.862        | 0.961        | 0.707        |
| 1               | 0.777        | 0.804       | 0.865       | 0.951       | 0.655        | 0.815       | 0.876        | 0.968        | 0.712        |
| 2551            | 0.779        | 0.811       | 0.872       | 0.958       | 0.658        | 0.824       | 0.881        | 0.967        | 0.715        |
| 14730           | 0.8078       | 0.815       | 0.875       | 0.965       | 0.662        | 0.827       | 0.885        | 0.978        | 0.718        |
| 3022            | 0.8125       | 0.822       | 0.873       | 0.962       | 0.661        | 0.834       | 0.886        | 0.974        | 0.714        |
| 7520            | 0.817        | 0.829       | 0.876       | 0.969       | 0.665        | 0.838       | 0.887        | 0.983        | 0.716        |
| 198             | 0.827        | 0.837       | 0.885       | 0.974       | 0.668        | 0.851       | 0.897        | 0.989        | 0.715        |
| 3807            | 0.8315       | 0.848       | 0.893       | 0.987       | 0.673        | 0.855       | 0.906        | 0.998        | 0.717        |
| 194             | 0.832        | 0.851       | 0.889       | 0.975       | 0.675        | 0.863       | 0.913        | 1.095        | 0.716        |
| 3293            | 0.8335       | 0.858       | 0.892       | 0.981       | 0.672        | 0.867       | 0.911        | 0.996        | 0.715        |
| 2070            | 0.8533       | 0.872       | 0.898       | 0.996       | 0.675        | 0.889       | 0.918        | 1.124        | 0.718        |
| 3               | 0.8568       | 0.879       | 0.907       | 0.993       | 0.67         | 0.893       | 0.925        | 1.12         | 0.72         |
| 1882            | 0.862        | 0.885       | 0.915       | 0.997       | 0.674        | 0.895       | 0.931        | 1.128        | 0.725        |
| 7327            | 0.862        | 0.881       | 0.913       | 0.995       | 0.677        | 0.893       | 0.929        | 1.115        | 0.728        |
| 12110           | 0.8693       | 0.887       | 0.919       | 0.997       | 0.681        | 0.898       | 0.927        | 1.119        | 0.732        |
| 8315            | 0.884        | 0.902       | 0.935       | 1.049       | 0.705        | 0.915       | 0.946        | 1.077        | 0.754        |
| 14842           | 0.8865       | 0.908       | 0.934       | 0.998       | 0.696        | 0.922       | 0.953        | 1.128        | 0.755        |
| 4840            | 0.888        | 0.918       | 0.939       | 1.037       | 0.702        | 0.926       | 0.955        | 1.125        | 0.746        |
| 8301            | 0.9          | 0.927       | 0.946       | 1.062       | 0.705        | 0.938       | 0.963        | 1.128        | 0.751        |
| 14696           | 0.9018       | 0.925       | 0.953       | 1.108       | 0.708        | 0.938       | 0.976        | 1.125        | 0.757        |
| 8342            | 0.905        | 0.931       | 0.965       | 1.115       | 0.713        | 0.947       | 0.978        | 1.129        | 0.761        |
| 2171            | 0.905        | 0.929       | 0.963       | 1.108       | 0.703        | 0.937       | 0.975        | 1.118        | 0.755        |
| 9032            | 0.908        | 0.933       | 0.968       | 1.119       | 0.706        | 0.941       | 0.981        | 1.127        | 0.757        |
| 2485            | 0.9193       | 0.939       | 0.973       | 1.127       | 0.712        | 0.948       | 0.985        | 1.136        | 0.766        |
| 14881           | 0.9263       | 0.945       | 0.975       | 1.136       | 0.718        | 0.955       | 0.983        | 1.146        | 0.768        |
| 3557            | 0.9313       | 0.951       | 0.979       | 1.141       | 0.725        | 0.961       | 0.985        | 1.153        | 0.772        |
|                 | <b>BHI</b>   | <b>Met</b>  | <b>Met</b>  | <b>Met</b>  | <b>Met</b>   | <b>SAM</b>  | <b>SAM</b>   | <b>SAM</b>   | <b>SAM</b>   |
| <b>Isolates</b> | <b>(W/-)</b> | <b>2 mM</b> | <b>4 mM</b> | <b>8 mM</b> | <b>10 mM</b> | <b>5 mM</b> | <b>10 mM</b> | <b>15 mM</b> | <b>20 mM</b> |
| 4020            | 0.957        | 0.959       | 0.985       | 1.159       | 0.729        | 0.967       | 0.992        | 1.173        | 0.783        |
| 4289            | 0.9628       | 0.967       | 0.997       | 1.195       | 0.737        | 0.978       | 1.016        | 1.221        | 0.788        |
| 4238            | 0.963        | 0.976       | 1.027       | 1.229       | 0.746        | 0.987       | 1.048        | 1.238        | 0.795        |
| 12998           | 0.9638       | 0.985       | 1.086       | 1.255       | 0.755        | 0.995       | 1.127        | 1.363        | 0.807        |
| 3248            | 0.9693       | 0.983       | 1.093       | 1.226       | 0.748        | 0.994       | 1.118        | 1.267        | 0.787        |
| 11              | 0.97         | 0.987       | 1.123       | 1.248       | 0.755        | 0.996       | 1.135        | 1.377        | 0.813        |

### Supplementary Data 5: Effect of amino acids on biofilm formation

|                 |              |             |             |             |              |             |              |              |              |
|-----------------|--------------|-------------|-------------|-------------|--------------|-------------|--------------|--------------|--------------|
| 10915           | 0.972        | 0.985       | 1.125       | 1.238       | 0.745        | 0.998       | 1.131        | 1.369        | 0.796        |
| 3830            | 0.9758       | 0.991       | 1.119       | 1.228       | 0.752        | 1.056       | 1.138        | 1.384        | 0.823        |
| 9517            | 1.005        | 1.107       | 1.129       | 1.241       | 0.758        | 1.119       | 1.146        | 1.378        | 0.829        |
| 2717            | 1.012        | 1.118       | 1.135       | 1.252       | 0.762        | 1.132       | 1.149        | 1.388        | 0.837        |
| 9972            | 1.026        | 1.129       | 1.149       | 1.263       | 0.775        | 1.143       | 1.158        | 1.381        | 0.835        |
| 15724           | 1.042        | 1.138       | 1.156       | 1.271       | 0.782        | 1.155       | 1.165        | 1.385        | 0.838        |
| 8571            | 1.058        | 1.145       | 1.166       | 1.282       | 0.785        | 1.167       | 1.179        | 1.394        | 0.842        |
| 1318            | 1.085        | 1.144       | 1.175       | 1.294       | 0.787        | 1.163       | 1.186        | 1.391        | 0.845        |
| 2825            | 1.091        | 1.149       | 1.175       | 1.298       | 0.791        | 1.172       | 1.189        | 1.395        | 0.843        |
| 12084           | 1.119        | 1.175       | 1.208       | 1.317       | 0.798        | 1.194       | 1.245        | 1.384        | 0.848        |
| 10046           | 1.143        | 1.189       | 1.218       | 1.326       | 0.805        | 1.217       | 1.265        | 1.396        | 0.849        |
| 13423           | 1.147        | 1.196       | 1.238       | 1.347       | 0.812        | 1.215       | 1.269        | 1.388        | 0.853        |
| 1313            | 1.156        | 1.208       | 1.247       | 1.358       | 0.821        | 1.227       | 1.282        | 1.395        | 0.864        |
| 3160            | 1.156        | 1.215       | 1.244       | 1.365       | 0.825        | 1.236       | 1.289        | 1.392        | 0.867        |
| 4059            | 1.157        | 1.213       | 1.245       | 1.365       | 0.829        | 1.243       | 1.285        | 1.387        | 0.865        |
| 6752            | 1.163        | 1.224       | 1.252       | 1.368       | 0.83         | 1.239       | 1.278        | 1.377        | 0.868        |
| 4073            | 1.169        | 1.233       | 1.255       | 1.371       | 0.832        | 1.245       | 1.274        | 1.389        | 0.874        |
| 14944           | 1.185        | 1.247       | 1.266       | 1.382       | 0.835        | 1.261       | 1.28         | 1.395        | 0.871        |
| 14735           | 1.186        | 1.251       | 1.265       | 1.378       | 0.833        | 1.265       | 1.288        | 1.389        | 0.879        |
| 2164            | 1.187        | 1.249       | 1.269       | 1.383       | 0.837        | 1.262       | 1.285        | 1.392        | 0.883        |
| 2700            | 1.195        | 1.257       | 1.285       | 1.396       | 0.844        | 1.274       | 1.304        | 1.411        | 0.887        |
| 10723           | 1.216        | 1.281       | 1.318       | 1.408       | 0.851        | 1.296       | 1.341        | 1.437        | 0.896        |
| 3398            | 1.225        | 1.289       | 1.331       | 1.425       | 0.863        | 1.308       | 1.353        | 1.449        | 0.908        |
| 1210            | 1.226        | 1.285       | 1.335       | 1.432       | 0.865        | 1.302       | 1.355        | 1.452        | 0.913        |
| 212             | 1.24         | 1.292       | 1.347       | 1.446       | 0.871        | 1.314       | 1.363        | 1.461        | 0.918        |
| 10825           | 1.25         | 1.304       | 1.355       | 1.452       | 0.875        | 1.311       | 1.372        | 1.468        | 0.915        |
| 3724            | 1.269        | 1.315       | 1.373       | 1.471       | 0.882        | 1.325       | 1.398        | 1.492        | 0.919        |
| 3652            | 1.279        | 1.322       | 1.385       | 1.487       | 0.887        | 1.338       | 1.413        | 1.515        | 0.925        |
| 201             | 1.279        | 1.318       | 1.377       | 1.481       | 0.883        | 1.331       | 1.405        | 1.507        | 0.928        |
| 7884            | 1.282        | 1.327       | 1.392       | 1.495       | 0.889        | 1.339       | 1.415        | 1.514        | 0.933        |
| 15718           | 1.298        | 1.335       | 1.404       | 1.508       | 0.893        | 1.347       | 1.421        | 1.523        | 0.939        |
| 14513           | 1.311        | 1.333       | 1.411       | 1.517       | 0.895        | 1.345       | 1.437        | 1.529        | 0.944        |
| 6585            | 1.329        | 1.342       | 1.417       | 1.525       | 0.904        | 1.353       | 1.444        | 1.538        | 0.948        |
|                 | <b>BHI</b>   | <b>Met</b>  | <b>Met</b>  | <b>Met</b>  | <b>Met</b>   | <b>SAM</b>  | <b>SAM</b>   | <b>SAM</b>   | <b>SAM</b>   |
| <b>Isolates</b> | <b>(W/-)</b> | <b>2 mM</b> | <b>4 mM</b> | <b>8 mM</b> | <b>10 mM</b> | <b>5 mM</b> | <b>10 mM</b> | <b>15 mM</b> | <b>20 mM</b> |
| 15521           | 1.33         | 1.346       | 1.428       | 1.538       | 0.905        | 1.359       | 1.468        | 1.559        | 0.952        |
| 2503            | 1.339        | 1.349       | 1.433       | 1.559       | 0.902        | 1.365       | 1.475        | 1.576        | 0.957        |
| 1309            | 1.341        | 1.358       | 1.451       | 1.575       | 0.908        | 1.384       | 1.493        | 1.593        | 0.963        |
| 2173            | 1.351        | 1.372       | 1.473       | 1.588       | 0.912        | 1.398       | 1.524        | 1.615        | 0.975        |
| 3709            | 1.371        | 1.404       | 1.498       | 1.613       | 0.919        | 1.421       | 1.537        | 1.629        | 0.986        |
| 2498            | 1.392        | 1.428       | 1.538       | 1.633       | 0.922        | 1.443       | 1.568        | 1.648        | 0.995        |
| 1834            | 1.398        | 1.435       | 1.535       | 1.646       | 0.928        | 1.448       | 1.583        | 1.663        | 1.057        |
| 10807           | 1.408        | 1.443       | 1.574       | 1.655       | 0.934        | 1.466       | 1.612        | 1.703        | 1.115        |

### Supplementary Data 5: Effect of amino acids on biofilm formation

|                 |              |             |             |             |              |             |              |              |              |
|-----------------|--------------|-------------|-------------|-------------|--------------|-------------|--------------|--------------|--------------|
| 195             | 1.43         | 1.475       | 1.644       | 1.687       | 0.939        | 1.488       | 1.677        | 1.716        | 1.119        |
| 13657           | 1.454        | 1.483       | 1.667       | 1.711       | 0.943        | 1.497       | 1.686        | 1.735        | 1.126        |
| 4299            | 1.488        | 1.516       | 1.683       | 1.735       | 0.948        | 1.529       | 1.699        | 1.754        | 1.133        |
| 8436            | 1.51         | 1.538       | 1.694       | 1.752       | 0.955        | 1.558       | 1.718        | 1.773        | 1.138        |
| 10101           | 1.525        | 1.554       | 1.718       | 1.759       | 0.961        | 1.575       | 1.726        | 1.788        | 1.145        |
| 13797           | 1.525        | 1.551       | 1.723       | 1.755       | 0.96         | 1.577       | 1.732        | 1.785        | 1.145        |
| 13059           | 1.543        | 1.584       | 1.757       | 1.789       | 0.976        | 1.598       | 1.776        | 1.803        | 1.152        |
| 13603           | 1.553        | 1.595       | 1.773       | 1.796       | 0.988        | 1.614       | 1.796        | 1.818        | 1.155        |
| 14478           | 1.565        | 1.614       | 1.788       | 1.815       | 0.992        | 1.632       | 1.805        | 1.827        | 1.162        |
| 1338            | 1.571        | 1.625       | 1.798       | 1.828       | 0.998        | 1.644       | 1.812        | 1.849        | 1.169        |
| 3362            | 1.585        | 1.633       | 1.815       | 1.843       | 1.051        | 1.65        | 1.826        | 1.857        | 1.176        |
| 2588            | 1.59         | 1.647       | 1.829       | 1.858       | 1.058        | 1.662       | 1.839        | 1.869        | 1.182        |
| 12497           | 1.597        | 1.653       | 1.831       | 1.867       | 1.061        | 1.668       | 1.843        | 1.875        | 1.187        |
| 197             | 1.602        | 1.675       | 1.846       | 1.878       | 1.068        | 1.685       | 1.855        | 1.887        | 1.189        |
| 13306           | 1.635        | 1.692       | 1.861       | 1.897       | 1.075        | 1.712       | 1.875        | 1.912        | 1.197        |
| Sim             | 1.655        | 1.698       | 1.877       | 1.912       | 1.082        | 1.713       | 1.888        | 1.925        | 1.204        |
| 14068           | 1.674        | 1.708       | 1.875       | 1.908       | 1.085        | 1.719       | 1.897        | 1.924        | 1.205        |
| 1922 R          | 1.675        | 1.705       | 1.871       | 1.905       | 1.085        | 1.717       | 1.903        | 1.921        | 1.203        |
| 1240            | 1.689        | 1.723       | 1.894       | 1.924       | 1.104        | 1.738       | 1.923        | 1.942        | 1.213        |
| 12566           | 1.693        | 1.738       | 1.922       | 1.947       | 1.107        | 1.751       | 1.942        | 1.963        | 1.218        |
| 12617           | 1.752        | 1.829       | 1.957       | 1.975       | 1.116        | 1.839       | 1.973        | 1.995        | 1.254        |
| 2187            | 1.756        | 1.825       | 1.955       | 1.971       | 1.107        | 1.837       | 1.975        | 1.991        | 1.251        |
| 10872           | 1.757        | 1.837       | 1.967       | 1.988       | 1.115        | 1.848       | 1.987        | 2.063        | 1.255        |
| 3415            | 1.758        | 1.835       | 1.965       | 1.985       | 1.113        | 1.847       | 1.985        | 2.069        | 1.258        |
| 4227            | 1.762        | 1.843       | 1.983       | 1.987       | 1.115        | 1.855       | 1.992        | 2.105        | 1.263        |
| 14350           | 1.775        | 1.855       | 1.996       | 2.056       | 1.119        | 1.872       | 2.107        | 2.236        | 1.268        |
| 3593            | 1.802        | 1.916       | 2.165       | 2.238       | 1.215        | 1.928       | 2.182        | 2.255        | 1.315        |
| 3690            | 1.811        | 1.921       | 2.179       | 2.247       | 1.223        | 1.933       | 2.194        | 2.269        | 1.311        |
| 2010            | 1.842        | 1.941       | 2.232       | 2.353       | 1.238        | 1.955       | 2.258        | 2.374        | 1.324        |
| 14345           | 1.864        | 1.944       | 2.255       | 2.378       | 1.246        | 1.959       | 2.296        | 2.393        | 1.328        |
| 13962           | 1.864        | 1.945       | 2.261       | 2.375       | 1.248        | 1.957       | 2.311        | 2.398        | 1.325        |
|                 | <b>BHI</b>   | <b>Met</b>  | <b>Met</b>  | <b>Met</b>  | <b>Met</b>   | <b>SAM</b>  | <b>SAM</b>   | <b>SAM</b>   | <b>SAM</b>   |
| <b>Isolates</b> | <b>(W/-)</b> | <b>2 mM</b> | <b>4 mM</b> | <b>8 mM</b> | <b>10 mM</b> | <b>5 mM</b> | <b>10 mM</b> | <b>15 mM</b> | <b>20 mM</b> |
| 10088           | 1.874        | 1.957       | 2.318       | 2.517       | 1.267        | 1.972       | 2.385        | 2.577        | 1.368        |
| 14203           | 1.886        | 1.965       | 2.327       | 2.534       | 1.265        | 1.983       | 2.394        | 2.594        | 1.375        |
| 6708            | 1.893        | 1.965       | 2.354       | 2.551       | 1.318        | 1.984       | 2.408        | 2.613        | 1.387        |
| 10012           | 1.903        | 1.974       | 2.355       | 2.568       | 1.329        | 1.995       | 2.428        | 2.645        | 1.391        |
| 2086            | 1.985        | 1.993       | 2.427       | 2.666       | 1.332        | 2.105       | 2.516        | 2.689        | 1.405        |
| 15603           | 2.011        | 2.115       | 2.494       | 2.687       | 1.335        | 2.227       | 2.611        | 2.746        | 1.416        |
| 2138            | 2.089        | 2.132       | 2.512       | 2.694       | 1.338        | 2.232       | 2.624        | 2.831        | 1.422        |
| 1337            | 2.099        | 2.176       | 2.562       | 2.724       | 1.355        | 2.264       | 2.658        | 2.847        | 1.431        |
| 145             | 2.186        | 2.234       | 2.642       | 2.873       | 1.358        | 2.377       | 2.751        | 2.95         | 1.438        |
| 2895            | 2.254        | 2.276       | 2.735       | 2.947       | 1.381        | 2.414       | 2.864        | 2.978        | 1.445        |

### Supplementary Data 5: Effect of amino acids on biofilm formation

|       |       |       |       |       |       |       |       |       |       |
|-------|-------|-------|-------|-------|-------|-------|-------|-------|-------|
| 12600 | 2.261 | 2.284 | 2.796 | 2.977 | 1.385 | 2.428 | 2.877 | 2.983 | 1.465 |
| 2196  | 2.333 | 2.389 | 2.824 | 2.985 | 1.394 | 2.519 | 2.891 | 2.996 | 1.474 |
| 2931  | 2.378 | 2.443 | 2.965 | 3.138 | 1.412 | 2.531 | 2.983 | 3.224 | 1.475 |
| 15598 | 2.576 | 2.655 | 3.137 | 3.452 | 1.456 | 2.758 | 3.188 | 3.527 | 1.482 |
| 10894 | 2.623 | 2.755 | 3.184 | 3.514 | 1.472 | 2.866 | 3.242 | 3.551 | 1.488 |
| 2844  | 2.672 | 2.813 | 3.189 | 3.528 | 1.481 | 2.857 | 3.241 | 3.498 | 1.493 |
| 196   | 2.804 | 3.061 | 3.354 | 3.671 | 1.489 | 3.247 | 3.381 | 3.776 | 1.511 |
| 497   | 2.939 | 3.175 | 3.379 | 3.658 | 1.506 | 3.239 | 3.389 | 3.775 | 1.515 |
| 1739  | 3.118 | 3.241 | 3.458 | 3.818 | 1.511 | 3.328 | 3.535 | 3.942 | 1.519 |
| 2887  | 3.423 | 3.448 | 3.765 | 3.855 | 1.522 | 3.524 | 3.814 | 3.877 | 1.529 |
| 10869 | 3.667 | 3.695 | 3.922 | 4.324 | 1.53  | 3.754 | 3.961 | 4.571 | 1.538 |
| 3420  | 3.689 | 3.822 | 3.975 | 4.533 | 1.542 | 3.859 | 3.997 | 4.562 | 1.547 |

# Supplementary Data 6: Fourier transform infrared spectroscopy

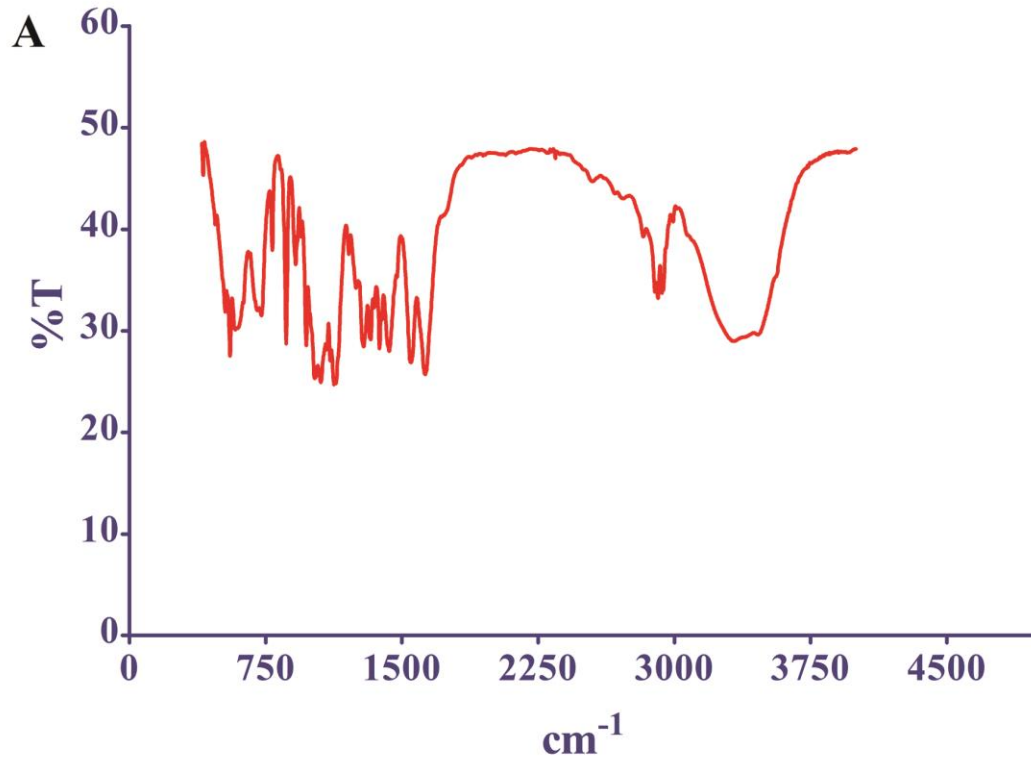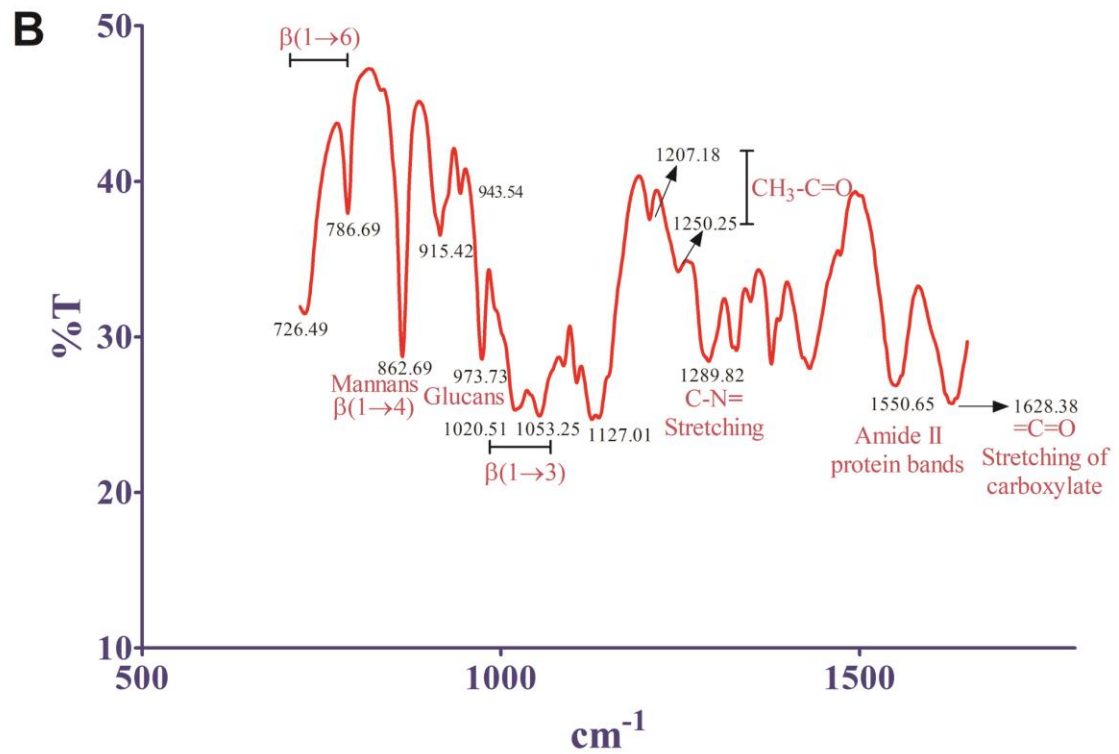



### Supplementary Data 7: Protein Estimation (Bradford's Assay Standard Plot)

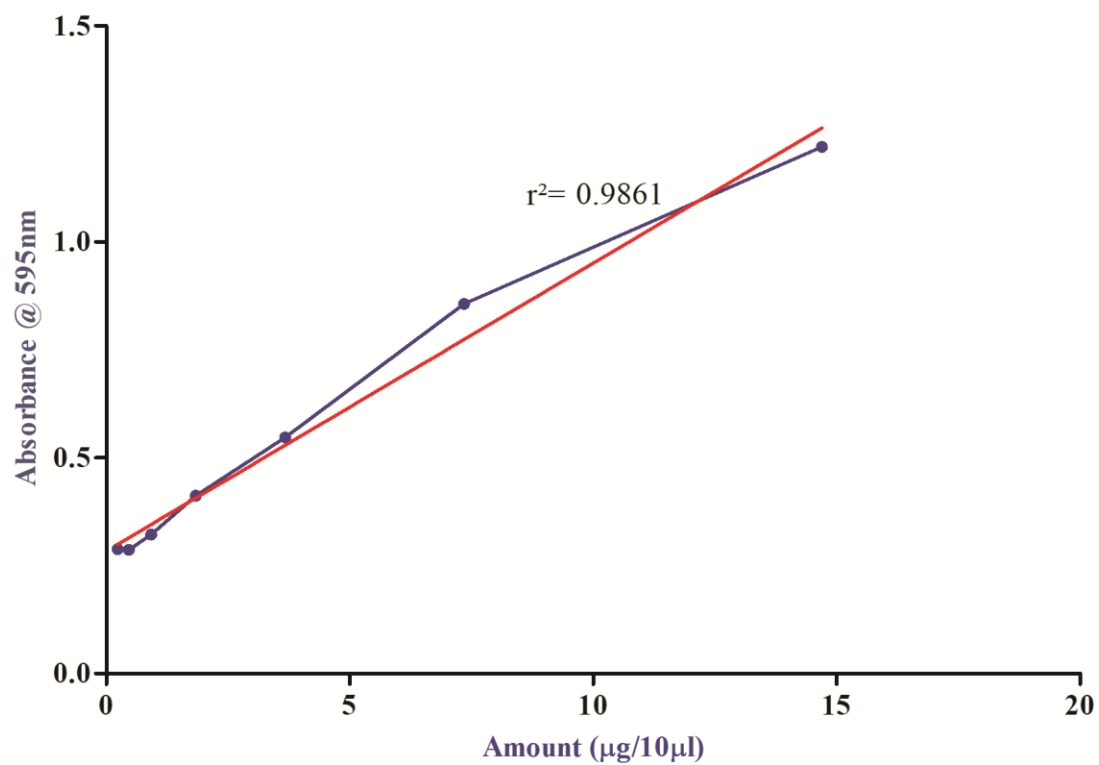

### Supplementary Data 8: Estimation of Total Sugar-Standard Plot

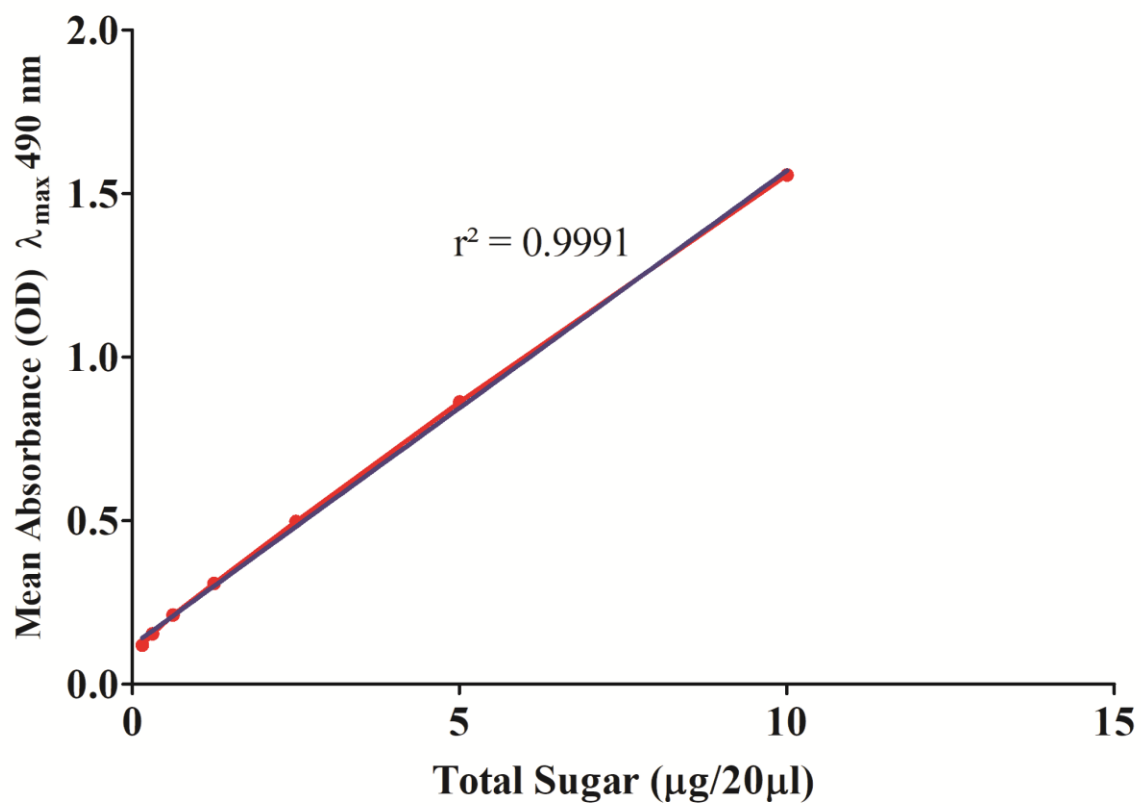

***MALDI MS MS Data Sheet for Stool Isolates***

Comment 1

Comment 2



| m/z      | S/N   | Quality | Fac. | Res.     | Intens. | Area |
|----------|-------|---------|------|----------|---------|------|
| 507.882  | 4.2   | 123     | 1649 | 270.76   | 118     |      |
| 535.929  | 3.7   | 119     | 1386 | 250.47   | 139     |      |
| 578.911  | 3.3   | 65      | 1723 | 243.83   | 120     |      |
| 614.953  | 10.6  | 1106    | 2101 | 824.38   | 364     |      |
| 721.012  | 3.5   | 96      | 1109 | 308.74   | 322     |      |
| 857.136  | 10.4  | 1623    | 1588 | 1062.27  | 992     |      |
| 1040.603 | 4.1   | 34      | 1867 | 493.92   | 528     |      |
| 1046.058 | 3.2   | 44      | 1835 | 378.85   | 416     |      |
| 1077.410 | 50.0  | 65736   | 2136 | 6039.84  | 6002    |      |
| 1086.565 | 3.0   | 126     | 2038 | 364.30   | 385     |      |
| 1090.141 | 4.0   | 340     | 2333 | 490.49   | 455     |      |
| 1173.598 | 9.1   | 632     | 1893 | 938.28   | 1213    |      |
| 1175.832 | 3.7   | 80      | 1866 | 374.74   | 493     |      |
| 1191.591 | 37.2  | 35486   | 2438 | 3638.72  | 3744    |      |
| 1216.686 | 15.4  | 1519    | 2388 | 1361.16  | 1482    |      |
| 1218.946 | 3.3   | 337     | 3683 | 284.46   | 201     |      |
| 1226.771 | 6.7   | 54      | 1589 | 568.78   | 944     |      |
| 1229.053 | 8.4   | 51      | 2121 | 717.19   | 896     |      |
| 1231.344 | 10.4  | 57      | 2733 | 883.30   | 858     |      |
| 1233.671 | 197.2 | 100212  | 3463 | 16603.22 | 12762   |      |

Comment 1

Comment 2

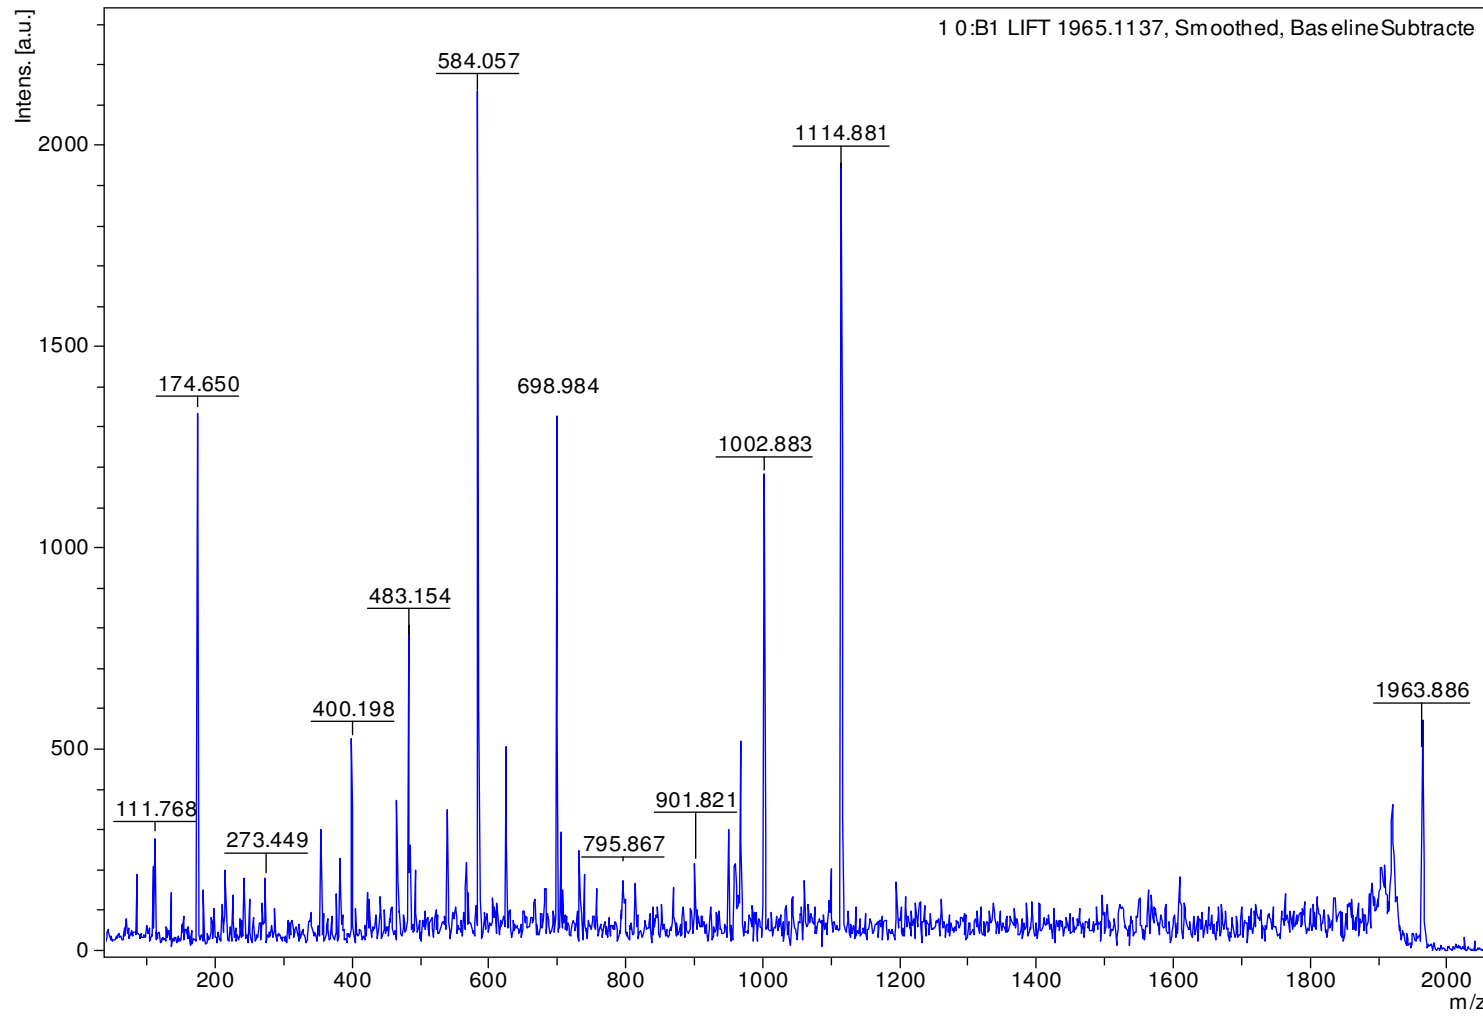

| m/z     | S/N  | Quality Fac. | Res. | Intens. | Area |
|---------|------|--------------|------|---------|------|
| 69.812  | 3.4  | 91           | 491  | 81.22   | 13   |
| 85.829  | 7.4  | 873          | 734  | 176.72  | 23   |
| 109.753 | 8.5  | 1786         | 1117 | 204.67  | 23   |
| 111.768 | 11.8 | 20258        | 1297 | 283.03  | 27   |
| 135.712 | 6.1  | 2760         | 1402 | 142.73  | 16   |
| 174.650 | 58.6 | 19275        | 1377 | 1338.50 | 198  |
| 182.645 | 6.0  | 1004         | 1096 | 138.10  | 27   |
| 194.575 | 4.1  | 34           | 1452 | 94.97   | 15   |
| 198.663 | 4.2  | 86           | 1175 | 96.10   | 19   |
| 210.607 | 4.9  | 347          | 1152 | 115.11  | 25   |
| 215.523 | 8.5  | 427          | 1223 | 196.45  | 41   |
| 226.543 | 6.0  | 172          | 1140 | 139.21  | 33   |
| 237.485 | 3.3  | 33           | 1934 | 78.07   | 12   |
| 242.501 | 7.3  | 349          | 1271 | 170.98  | 40   |
| 250.487 | 5.4  | 329          | 1792 | 128.14  | 22   |
| 256.470 | 3.9  | 37           | 1004 | 91.68   | 29   |
| 269.397 | 5.7  | 97           | 1609 | 136.37  | 28   |
| 273.449 | 7.4  | 956          | 1587 | 179.61  | 38   |
| 287.460 | 4.1  | 97           | 1674 | 103.33  | 22   |
| 355.275 | 10.0 | 2255         | 1715 | 292.44  | 79   |
| 370.232 | 3.0  | 35           | 2459 | 92.78   | 18   |
| 378.233 | 4.3  | 283          | 1848 | 135.55  | 36   |
| 383.231 | 7.7  | 87           | 1424 | 244.44  | 87   |
| 400.198 | 15.7 | 5048         | 1484 | 521.68  | 187  |
| 422.173 | 4.3  | 47           | 1620 | 149.96  | 53   |
| 426.226 | 3.4  | 114          | 1492 | 120.38  | 46   |
| 466.171 | 9.1  | 378          | 1786 | 355.04  | 128  |
| 483.154 | 19.2 | 1635         | 1882 | 770.71  | 275  |
| 493.075 | 4.8  | 297          | 1551 | 195.07  | 87   |
| 540.121 | 7.7  | 848          | 1639 | 343.65  | 162  |
| 567.046 | 4.6  | 141          | 2222 | 213.35  | 79   |
| 569.995 | 3.3  | 53           | 2366 | 154.20  | 54   |
| 584.057 | 44.6 | 59222        | 1862 | 2125.95 | 980  |
| 606.030 | 3.0  | 64           | 2386 | 145.43  | 55   |
| 625.959 | 10.2 | 3914         | 1804 | 504.02  | 265  |
| 698.984 | 26.1 | 66753        | 2287 | 1352.72 | 654  |
| 704.989 | 5.3  | 244          | 1984 | 277.50  | 156  |
| 732.967 | 5.1  | 187          | 1922 | 265.96  | 163  |

| m/z      | S/N  | Quality Fac. | Res. | Intens. | Area |
|----------|------|--------------|------|---------|------|
| 738.935  | 3.8  | 333          | 1967 | 195.71  | 119  |
| 795.867  | 3.9  | 34           | 2324 | 208.26  | 119  |
| 901.821  | 3.8  | 233          | 2442 | 216.03  | 142  |
| 950.822  | 4.5  | 219          | 2767 | 256.62  | 161  |
| 967.863  | 9.0  | 2026         | 2556 | 521.32  | 364  |
| 1002.883 | 20.0 | 85180        | 2284 | 1179.20 | 973  |
| 1114.881 | 31.5 | 33218        | 2430 | 1930.88 | 1784 |
| 1903.946 | 4.1  | 71           | 3911 | 193.11  | 294  |
| 1908.591 | 3.4  | 78           | 2569 | 161.65  | 376  |
| 1919.807 | 7.2  | 490          | 2272 | 328.32  | 869  |
| 1963.886 | 12.8 | 958          | 4893 | 494.66  | 624  |

Comment 1

Comment 2



| m/z      | S/N  | Quality Fac. | Res. | Intens. | Area |
|----------|------|--------------|------|---------|------|
| 86.095   | 3.7  | 318          | 888  | 132.47  | 14   |
| 112.099  | 5.8  | 4262         | 1131 | 209.83  | 23   |
| 154.076  | 5.0  | 708          | 1240 | 171.83  | 24   |
| 157.520  | 3.0  | 296          | 1602 | 103.83  | 12   |
| 175.080  | 23.2 | 13888        | 1205 | 793.82  | 135  |
| 197.082  | 4.3  | 260          | 1048 | 144.46  | 32   |
| 213.030  | 3.2  | 33           | 865  | 107.68  | 32   |
| 303.991  | 3.8  | 227          | 1228 | 135.23  | 42   |
| 527.795  | 4.1  | 108          | 1297 | 201.81  | 117  |
| 586.826  | 12.4 | 9724         | 1771 | 656.38  | 320  |
| 701.775  | 9.9  | 12059        | 1907 | 582.11  | 339  |
| 887.781  | 3.9  | 226          | 1916 | 257.58  | 210  |
| 1113.807 | 4.2  | 205          | 2752 | 319.62  | 260  |
| 1532.032 | 6.0  | 1540         | 2508 | 559.64  | 876  |
| 2150.750 | 3.1  | 31           | 4027 | 196.21  | 335  |
| 2158.627 | 4.1  | 64           | 2397 | 257.36  | 742  |
| 2165.298 | 3.3  | 89           | 3326 | 202.64  | 423  |
| 2168.224 | 3.8  | 119          | 3072 | 231.81  | 525  |
| 2213.218 | 3.1  | 104          | 2741 | 166.76  | 436  |
| 2229.210 | 25.3 | 14503        | 4266 | 1341.53 | 2274 |



Comment 1

Comment 2



| m/z      | S/N  | Quality Fac. | Res. | Intens.  | Area |
|----------|------|--------------|------|----------|------|
| 790.462  | 6.9  | 843          | 6070 | 942.72   | 216  |
| 804.317  | 42.4 | 6172         | 5917 | 5779.46  | 1387 |
| 832.350  | 13.4 | 1914         | 5114 | 1826.25  | 526  |
| 861.082  | 12.1 | 1600         | 5837 | 1666.02  | 429  |
| 877.059  | 10.7 | 569          | 5818 | 1483.75  | 399  |
| 1027.617 | 6.5  | 535          | 5784 | 931.21   | 323  |
| 1233.670 | 88.8 | 31051        | 8131 | 13319.41 | 4639 |
| 1255.649 | 9.8  | 1852         | 6814 | 1486.09  | 616  |
| 1269.671 | 6.1  | 208          | 6093 | 924.11   | 434  |
| 1326.745 | 22.1 | 11217        | 8403 | 3353.71  | 1277 |
| 1475.822 | 16.4 | 15650        | 9197 | 2514.78  | 1068 |
| 1477.780 | 7.0  | 1493         | 8072 | 1078.91  | 502  |
| 1494.883 | 7.0  | 572          | 6100 | 1064.15  | 667  |
| 1511.904 | 8.1  | 3724         | 8026 | 1233.09  | 609  |
| 1617.881 | 12.7 | 2817         | 8784 | 1924.65  | 988  |
| 1631.893 | 23.8 | 34192        | 9043 | 3577.56  | 1825 |
| 1803.992 | 11.7 | 3302         | 7377 | 1659.11  | 1252 |
| 1947.078 | 7.5  | 619          | 7733 | 940.75   | 756  |
| 1949.066 | 19.8 | 6629         | 8417 | 2495.57  | 1853 |
| 1965.121 | 86.9 | 12181        | 8794 | 10760.25 | 7834 |
| 1967.186 | 22.5 | 891          | 6835 | 2781.92  | 2554 |
| 1988.112 | 9.4  | 2140         | 7469 | 1132.43  | 969  |
| 2117.319 | 24.3 | 48010        | 9033 | 2501.34  | 1953 |
| 2229.247 | 14.0 | 1350         | 7998 | 1272.66  | 1172 |
| 2399.243 | 6.9  | 2736         | 5618 | 504.27   | 744  |



User : sanovar  
 Email : sanovar@sandor.co.in  
 Search title :  
 MS data file : DATA.TXT  
 Database : SwissProt 2018\_06 (557713 sequences; 200130199 residues)  
 Taxonomy : Bacteria (Eubacteria) (333552 sequences)  
 Timestamp : 11 Jul 2018 at 11:29:47 GMT  
 Warning : **A Peptide summary report will usually give a much clearer picture of MS/MS search results.**  
 Top Score : 138 for **EFTU1\_ECO24**, Elongation factor Tu 1 OS=Escherichia coli O139:H28 (strain E24377A / ETEC) OX=331111 GN=tuf1 PI

### Mascot Score Histogram

Protein score is  $-10 \cdot \log(P)$ , where P is the probability that the observed match is a random event.  
 Protein scores greater than 68 are significant ( $p < 0.05$ ).  
 Protein scores are derived from ions scores as a non-probabilistic basis for ranking protein hits.

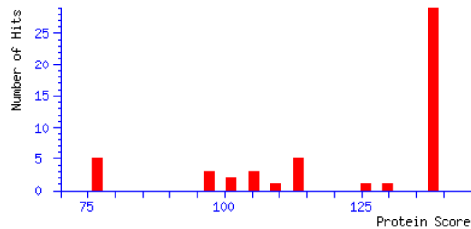

### Protein Summary Report

Format As  [Help](#)  
 Significance threshold  $p <$   Max. number of hits   
 Preferred taxonomy

### Index

| Accession                       | Mass  | Score | Description                                                                                              |
|---------------------------------|-------|-------|----------------------------------------------------------------------------------------------------------|
| 1. <a href="#">EFTU1_ECO24</a>  | 43427 | 138   | Elongation factor Tu 1 OS=Escherichia coli O139:H28 (strain E24377A / ETEC) OX=331111 GN=tuf1 PE=3 SV=1  |
| 2. <a href="#">EFTU1_ECOHS</a>  | 43427 | 138   | Elongation factor Tu 1 OS=Escherichia coli O9:H4 (strain HS) OX=331112 GN=tuf1 PE=3 SV=1                 |
| 3. <a href="#">EFTU1_ECOK1</a>  | 43427 | 138   | Elongation factor Tu 1 OS=Escherichia coli O1:K1 / APEC OX=405955 GN=tuf1 PE=3 SV=2                      |
| 4. <a href="#">EFTU1_ECOL5</a>  | 43427 | 138   | Elongation factor Tu 1 OS=Escherichia coli O6:K15:H31 (strain 536 / UPEC) OX=362663 GN=tuf1 PE=3 SV=1    |
| 5. <a href="#">EFTU1_ECOLC</a>  | 43427 | 138   | Elongation factor Tu 1 OS=Escherichia coli (strain ATCC 8739 / DSM 1576 / Crooks) OX=481805 GN=tuf1 PE=  |
| 6. <a href="#">EFTU1_ECOLI</a>  | 43427 | 138   | Elongation factor Tu 1 OS=Escherichia coli (strain K12) OX=83333 GN=tufA PE=1 SV=1                       |
| 7. <a href="#">EFTU1_ECOUT</a>  | 43427 | 138   | Elongation factor Tu 1 OS=Escherichia coli (strain UTI89 / UPEC) OX=364106 GN=tuf1 PE=1 SV=1             |
| 8. <a href="#">EFTU1_SHIF8</a>  | 43426 | 138   | Elongation factor Tu 1 OS=Shigella flexneri serotype 5b (strain 8401) OX=373384 GN=tuf1 PE=3 SV=1        |
| 9. <a href="#">EFTU1_SHISS</a>  | 43427 | 138   | Elongation factor Tu 1 OS=Shigella sonnei (strain Ss046) OX=300269 GN=tuf1 PE=3 SV=1                     |
| 10. <a href="#">EFTU2_ECO24</a> | 43456 | 138   | Elongation factor Tu 2 OS=Escherichia coli O139:H28 (strain E24377A / ETEC) OX=331111 GN=tuf2 PE=3 SV=1  |
| 11. <a href="#">EFTU2_ECOHS</a> | 43457 | 138   | Elongation factor Tu 2 OS=Escherichia coli O9:H4 (strain HS) OX=331112 GN=tuf2 PE=3 SV=1                 |
| 12. <a href="#">EFTU2_ECOK1</a> | 43457 | 138   | Elongation factor Tu 2 OS=Escherichia coli O1:K1 / APEC OX=405955 GN=tuf2 PE=3 SV=1                      |
| 13. <a href="#">EFTU2_ECOL5</a> | 43457 | 138   | Elongation factor Tu 2 OS=Escherichia coli O6:K15:H31 (strain 536 / UPEC) OX=362663 GN=tuf2 PE=3 SV=1    |
| 14. <a href="#">EFTU2_ECOLC</a> | 43457 | 138   | Elongation factor Tu 2 OS=Escherichia coli (strain ATCC 8739 / DSM 1576 / Crooks) OX=481805 GN=tuf2 PE=  |
| 15. <a href="#">EFTU2_ECOLI</a> | 43457 | 138   | Elongation factor Tu 2 OS=Escherichia coli (strain K12) OX=83333 GN=tufB PE=1 SV=1                       |
| 16. <a href="#">EFTU2_ECOUT</a> | 43457 | 138   | Elongation factor Tu 2 OS=Escherichia coli (strain UTI89 / UPEC) OX=364106 GN=tuf2 PE=3 SV=2             |
| 17. <a href="#">EFTU2_SHIF8</a> | 43457 | 138   | Elongation factor Tu 2 OS=Shigella flexneri serotype 5b (strain 8401) OX=373384 GN=tuf2 PE=3 SV=1        |
| 18. <a href="#">EFTU2_SHISS</a> | 43457 | 138   | Elongation factor Tu 2 OS=Shigella sonnei (strain Ss046) OX=300269 GN=tuf2 PE=3 SV=1                     |
| 19. <a href="#">EFTU_ECO57</a>  | 43457 | 138   | Elongation factor Tu OS=Escherichia coli O157:H7 OX=83334 GN=tufA PE=3 SV=2                              |
| 20. <a href="#">EFTU_ECOL6</a>  | 43457 | 138   | Elongation factor Tu OS=Escherichia coli O6:H1 (strain CFT073 / ATCC 700928 / UPEC) OX=199310 GN=tufA PI |

### Results List

1. [EFTU1\\_ECO24](#) Mass: 43427 Score: 138 Expect: 5.3e-09 Matches: 11  
 Elongation factor Tu 1 OS=Escherichia coli O139:H28 (strain E24377A / ETEC) OX=331111 GN=tuf1 PE=3 SV=1

| Observed  | Mr(expt)  | Mr(calc)  | ppm  | Start | End   | Miss | Ions | Peptide                             |
|-----------|-----------|-----------|------|-------|-------|------|------|-------------------------------------|
| 837.5072  | 836.4999  | 836.4868  | 15.7 | 118   | - 124 | 0    | ---  | R.EHILLGR.Q                         |
| 1027.6166 | 1026.6093 | 1026.5822 | 26.4 | 271   | - 280 | 0    | ---  | R.AGENVGVLLR.G                      |
| 1214.6581 | 1213.6508 | 1213.6230 | 22.9 | 305   | - 314 | 0    | ---  | K.FESEVYILSK.D                      |
| 1233.6701 | 1232.6629 | 1232.6091 | 43.6 | 326   | - 334 | 0    | 15   | K.GYRPFYFR.T                        |
| 1315.7305 | 1314.7232 | 1314.6060 | 89.1 | 254   | - 264 | 1    | ---  | K.STCTGVEMFRK.L                     |
| 1574.9723 | 1573.9650 | 1573.9304 | 22.0 | 290   | - 304 | 0    | ---  | R.GQVLAKPGTIKPHTK.F                 |
| 1728.9325 | 1727.9253 | 1727.8366 | 51.3 | 305   | - 319 | 1    | ---  | K.FESEVYILSKDEGGR.H                 |
| 1797.0350 | 1796.0277 | 1795.9325 | 53.1 | 359   | - 374 | 0    | ---  | K.MVVTLIHPIAMDGLR.F + Oxidation (M) |
| 1803.9918 | 1802.9845 | 1802.8799 | 58.0 | 60    | - 75  | 0    | ---  | R.GITINTSHVEYDTPTR.H                |
| 1965.1206 | 1964.1134 | 1963.9527 | 81.8 | 156   | - 172 | 0    | 44   | R.ELLSQYDFPGDDTPIVR.G               |
| 2117.3190 | 2116.3117 | 2116.1568 | 73.2 | 206   | - 224 | 0    | 28   | R.AIDKPFLLPIEDVFSISGR.G             |

No match to: 723.3202, 725.3349, 790.4618, 804.3175, 832.3504, 848.3077, 855.0634, 861.0816, 877.0593, 879.0642, 893.0384, 897.0395, 930.4819, 941.5245, 965.5432, 985.5503, 1001.5439, 1046.5846, 1179.6348, 1193.6685, 1219.5995, 1255.6486, 1269.6710, 1271.6285, 1277.6571, 1296.7322, 1320.6617, 1326.7448, 1348.7190, 1368.7612, 1450.7841, 1472.8880, 1475.8216, 1477.7796, 1494.8828, 1497.7996, 1509.8403, 1511.9038, 1527.8609, 1550.8947, 1598.9195, 1617.8806, 1631.8934, 1654.9031, 1707.9342, 1712.9042, 1733.0067, 1749.9856, 1755.9948, 1818.0212, 1866.0850, 1898.0605, 1915.0945, 1931.0593, 1947.0781, 1949.0662, 1967.1856, 1981.0932, 1988.1120, 1994.1406, 2005.1346, 2010.0916, 2139.2472, 2211.2249, 2229.2467, 2233.2426, 2271.2633, 2384.1999, 2399.2428, 2439.4144, 2451.4028, 2498.4046, 2615.4719, 2705.3847, 2808.6002, 3284.5981

2. [EFTU1\\_ECOHS](#) Mass: 43427 Score: 138 Expect: 5.3e-09 Matches: 11  
 Elongation factor Tu 1 OS=Escherichia coli O9:H4 (strain HS) OX=331112 GN=tuf1 PE=3 SV=1

| Observed | Mr(expt) | Mr(calc) | ppm  | Start | End   | Miss | Ions | Peptide     |
|----------|----------|----------|------|-------|-------|------|------|-------------|
| 837.5072 | 836.4999 | 836.4868 | 15.7 | 118   | - 124 | 0    | ---  | R.EHILLGR.Q |

1027.6166 1026.6093 1026.5822 26.4 271 - 280 0 --- R.AGENVGVLLR.G  
 1214.6581 1213.6508 1213.6230 22.9 305 - 314 0 --- K.FESEVYILSK.D  
 1233.6701 1232.6629 1232.6091 43.6 326 - 334 0 15 K.GYRPFYFR.T  
 1315.7305 1314.7232 1314.6060 89.1 254 - 264 1 --- K.STCTGVEMFRK.L  
 1574.9723 1573.9650 1573.9304 22.0 290 - 304 0 --- R.GQVLAKPGTIKPHTK.F  
 1728.9325 1727.9253 1727.8366 51.3 305 - 319 1 --- K.FESEVYILSKDEGGR.H  
 1797.0350 1796.0277 1795.9325 53.1 359 - 374 0 --- K.MVVTLIHPAMDGLR.F + Oxidation (M)  
 1803.9918 1802.9845 1802.8799 58.0 60 - 75 0 --- R.GITINTSHVEYDTPTR.H  
 1965.1206 1964.1134 1963.9527 81.8 156 - 172 0 44 R.ELLSQYDFPGDDTPIVR.G  
 2117.3190 2116.3117 2116.1568 73.2 206 - 224 0 28 R.AIDKPFLLPIEDVFSISGR.G  
**No match to:** 723.3202, 725.3349, 790.4618, 804.3175, 832.3504, 848.3077, 855.0634, 861.0816, 877.0593, 879.0642, 893.0384, 897.0395, 930.4819, 941.5245, 965.5432, 985.5503, 1001.5439, 1046.5846, 1179.6348, 1193.6685, 1219.5995, 1255.6486, 1269.6710, 1271.6285, 1277.6571, 1296.7322, 1320.6617, 1326.7448, 1348.7190, 1368.7612, 1450.7841, 1472.8880, 1475.8216, 1477.7796, 1494.8828, 1497.7996, 1509.8403, 1511.9038, 1527.8609, 1550.8947, 1598.9195, 1617.8806, 1631.8934, 1654.9031, 1707.9342, 1712.9042, 1733.0067, 1749.9856, 1755.9948, 1818.0212, 1866.0850, 1898.0605, 1915.0945, 1931.0593, 1947.0781, 1949.0662, 1967.1856, 1981.0932, 1988.1120, 1994.1406, 2005.1346, 2010.0916, 2139.2472, 2211.2249, 2229.2467, 2233.2426, 2271.2633, 2384.1999, 2399.2428, 2439.4144, 2451.4028, 2498.4046, 2615.4719, 2705.3847, 2808.6002, 3284.5981

3. [EFTUI\\_ECOKI](#) Mass: 43427 Score: 138 Expect: 5.3e-09 Matches: 11

Elongation factor Tu 1 OS=Escherichia coli O1:K1 / APEC OX=405955 GN=tuf1 PE=3 SV=2

| Observed  | Mr(expt)  | Mr(calc)  | ppm  | Start | End | Miss | Ions | Peptide                            |
|-----------|-----------|-----------|------|-------|-----|------|------|------------------------------------|
| 837.5072  | 836.4999  | 836.4868  | 15.7 | 118   | 124 | 0    | ---  | R.EHILLGR.Q                        |
| 1027.6166 | 1026.6093 | 1026.5822 | 26.4 | 271   | 280 | 0    | ---  | R.AGENVGVLLR.G                     |
| 1214.6581 | 1213.6508 | 1213.6230 | 22.9 | 305   | 314 | 0    | ---  | K.FESEVYILSK.D                     |
| 1233.6701 | 1232.6629 | 1232.6091 | 43.6 | 326   | 334 | 0    | 15   | K.GYRPFYFR.T                       |
| 1315.7305 | 1314.7232 | 1314.6060 | 89.1 | 254   | 264 | 1    | ---  | K.STCTGVEMFRK.L                    |
| 1574.9723 | 1573.9650 | 1573.9304 | 22.0 | 290   | 304 | 0    | ---  | R.GQVLAKPGTIKPHTK.F                |
| 1728.9325 | 1727.9253 | 1727.8366 | 51.3 | 305   | 319 | 1    | ---  | K.FESEVYILSKDEGGR.H                |
| 1797.0350 | 1796.0277 | 1795.9325 | 53.1 | 359   | 374 | 0    | ---  | K.MVVTLIHPAMDGLR.F + Oxidation (M) |
| 1803.9918 | 1802.9845 | 1802.8799 | 58.0 | 60    | 75  | 0    | ---  | R.GITINTSHVEYDTPTR.H               |
| 1965.1206 | 1964.1134 | 1963.9527 | 81.8 | 156   | 172 | 0    | 44   | R.ELLSQYDFPGDDTPIVR.G              |
| 2117.3190 | 2116.3117 | 2116.1568 | 73.2 | 206   | 224 | 0    | 28   | R.AIDKPFLLPIEDVFSISGR.G            |

**No match to:** 723.3202, 725.3349, 790.4618, 804.3175, 832.3504, 848.3077, 855.0634, 861.0816, 877.0593, 879.0642, 893.0384, 897.0395, 930.4819, 941.5245, 965.5432, 985.5503, 1001.5439, 1046.5846, 1179.6348, 1193.6685, 1219.5995, 1255.6486, 1269.6710, 1271.6285, 1277.6571, 1296.7322, 1320.6617, 1326.7448, 1348.7190, 1368.7612, 1450.7841, 1472.8880, 1475.8216, 1477.7796, 1494.8828, 1497.7996, 1509.8403, 1511.9038, 1527.8609, 1550.8947, 1598.9195, 1617.8806, 1631.8934, 1654.9031, 1707.9342, 1712.9042, 1733.0067, 1749.9856, 1755.9948, 1818.0212, 1866.0850, 1898.0605, 1915.0945, 1931.0593, 1947.0781, 1949.0662, 1967.1856, 1981.0932, 1988.1120, 1994.1406, 2005.1346, 2010.0916, 2139.2472, 2211.2249, 2229.2467, 2233.2426, 2271.2633, 2384.1999, 2399.2428, 2439.4144, 2451.4028, 2498.4046, 2615.4719, 2705.3847, 2808.6002, 3284.5981

4. [EFTUI\\_ECOLS](#) Mass: 43427 Score: 138 Expect: 5.3e-09 Matches: 11

Elongation factor Tu 1 OS=Escherichia coli O6:K15:H31 (strain 536 / UPEC) OX=362663 GN=tuf1 PE=3 SV=1

| Observed  | Mr(expt)  | Mr(calc)  | ppm  | Start | End | Miss | Ions | Peptide                            |
|-----------|-----------|-----------|------|-------|-----|------|------|------------------------------------|
| 837.5072  | 836.4999  | 836.4868  | 15.7 | 118   | 124 | 0    | ---  | R.EHILLGR.Q                        |
| 1027.6166 | 1026.6093 | 1026.5822 | 26.4 | 271   | 280 | 0    | ---  | R.AGENVGVLLR.G                     |
| 1214.6581 | 1213.6508 | 1213.6230 | 22.9 | 305   | 314 | 0    | ---  | K.FESEVYILSK.D                     |
| 1233.6701 | 1232.6629 | 1232.6091 | 43.6 | 326   | 334 | 0    | 15   | K.GYRPFYFR.T                       |
| 1315.7305 | 1314.7232 | 1314.6060 | 89.1 | 254   | 264 | 1    | ---  | K.STCTGVEMFRK.L                    |
| 1574.9723 | 1573.9650 | 1573.9304 | 22.0 | 290   | 304 | 0    | ---  | R.GQVLAKPGTIKPHTK.F                |
| 1728.9325 | 1727.9253 | 1727.8366 | 51.3 | 305   | 319 | 1    | ---  | K.FESEVYILSKDEGGR.H                |
| 1797.0350 | 1796.0277 | 1795.9325 | 53.1 | 359   | 374 | 0    | ---  | K.MVVTLIHPAMDGLR.F + Oxidation (M) |
| 1803.9918 | 1802.9845 | 1802.8799 | 58.0 | 60    | 75  | 0    | ---  | R.GITINTSHVEYDTPTR.H               |
| 1965.1206 | 1964.1134 | 1963.9527 | 81.8 | 156   | 172 | 0    | 44   | R.ELLSQYDFPGDDTPIVR.G              |
| 2117.3190 | 2116.3117 | 2116.1568 | 73.2 | 206   | 224 | 0    | 28   | R.AIDKPFLLPIEDVFSISGR.G            |

**No match to:** 723.3202, 725.3349, 790.4618, 804.3175, 832.3504, 848.3077, 855.0634, 861.0816, 877.0593, 879.0642, 893.0384, 897.0395, 930.4819, 941.5245, 965.5432, 985.5503, 1001.5439, 1046.5846, 1179.6348, 1193.6685, 1219.5995, 1255.6486, 1269.6710, 1271.6285, 1277.6571, 1296.7322, 1320.6617, 1326.7448, 1348.7190, 1368.7612, 1450.7841, 1472.8880, 1475.8216, 1477.7796, 1494.8828, 1497.7996, 1509.8403, 1511.9038, 1527.8609, 1550.8947, 1598.9195, 1617.8806, 1631.8934, 1654.9031, 1707.9342, 1712.9042, 1733.0067, 1749.9856, 1755.9948, 1818.0212, 1866.0850, 1898.0605, 1915.0945, 1931.0593, 1947.0781, 1949.0662, 1967.1856, 1981.0932, 1988.1120, 1994.1406, 2005.1346, 2010.0916, 2139.2472, 2211.2249, 2229.2467, 2233.2426, 2271.2633, 2384.1999, 2399.2428, 2439.4144, 2451.4028, 2498.4046, 2615.4719, 2705.3847, 2808.6002, 3284.5981

5. [EFTUI\\_ECOLC](#) Mass: 43427 Score: 138 Expect: 5.3e-09 Matches: 11

Elongation factor Tu 1 OS=Escherichia coli (strain ATCC 8739 / DSM 1576 / Crooks) OX=481805 GN=tuf1 PE=3 SV=1

| Observed  | Mr(expt)  | Mr(calc)  | ppm  | Start | End | Miss | Ions | Peptide                            |
|-----------|-----------|-----------|------|-------|-----|------|------|------------------------------------|
| 837.5072  | 836.4999  | 836.4868  | 15.7 | 118   | 124 | 0    | ---  | R.EHILLGR.Q                        |
| 1027.6166 | 1026.6093 | 1026.5822 | 26.4 | 271   | 280 | 0    | ---  | R.AGENVGVLLR.G                     |
| 1214.6581 | 1213.6508 | 1213.6230 | 22.9 | 305   | 314 | 0    | ---  | K.FESEVYILSK.D                     |
| 1233.6701 | 1232.6629 | 1232.6091 | 43.6 | 326   | 334 | 0    | 15   | K.GYRPFYFR.T                       |
| 1315.7305 | 1314.7232 | 1314.6060 | 89.1 | 254   | 264 | 1    | ---  | K.STCTGVEMFRK.L                    |
| 1574.9723 | 1573.9650 | 1573.9304 | 22.0 | 290   | 304 | 0    | ---  | R.GQVLAKPGTIKPHTK.F                |
| 1728.9325 | 1727.9253 | 1727.8366 | 51.3 | 305   | 319 | 1    | ---  | K.FESEVYILSKDEGGR.H                |
| 1797.0350 | 1796.0277 | 1795.9325 | 53.1 | 359   | 374 | 0    | ---  | K.MVVTLIHPAMDGLR.F + Oxidation (M) |
| 1803.9918 | 1802.9845 | 1802.8799 | 58.0 | 60    | 75  | 0    | ---  | R.GITINTSHVEYDTPTR.H               |
| 1965.1206 | 1964.1134 | 1963.9527 | 81.8 | 156   | 172 | 0    | 44   | R.ELLSQYDFPGDDTPIVR.G              |
| 2117.3190 | 2116.3117 | 2116.1568 | 73.2 | 206   | 224 | 0    | 28   | R.AIDKPFLLPIEDVFSISGR.G            |

**No match to:** 723.3202, 725.3349, 790.4618, 804.3175, 832.3504, 848.3077, 855.0634, 861.0816, 877.0593, 879.0642, 893.0384, 897.0395, 930.4819, 941.5245, 965.5432, 985.5503, 1001.5439, 1046.5846, 1179.6348, 1193.6685, 1219.5995, 1255.6486, 1269.6710, 1271.6285, 1277.6571, 1296.7322, 1320.6617, 1326.7448, 1348.7190, 1368.7612, 1450.7841, 1472.8880, 1475.8216, 1477.7796, 1494.8828, 1497.7996, 1509.8403, 1511.9038, 1527.8609, 1550.8947, 1598.9195, 1617.8806, 1631.8934, 1654.9031, 1707.9342, 1712.9042, 1733.0067, 1749.9856, 1755.9948, 1818.0212, 1866.0850, 1898.0605, 1915.0945, 1931.0593, 1947.0781, 1949.0662, 1967.1856, 1981.0932, 1988.1120, 1994.1406, 2005.1346, 2010.0916, 2139.2472, 2211.2249, 2229.2467, 2233.2426, 2271.2633, 2384.1999, 2399.2428, 2439.4144, 2451.4028, 2498.4046, 2615.4719, 2705.3847, 2808.6002, 3284.5981

6. [EFTUI\\_ECOLI](#) Mass: 43427 Score: 138 Expect: 5.3e-09 Matches: 11

Elongation factor Tu 1 OS=Escherichia coli (strain K12) OX=83333 GN=tufA PE=1 SV=1

| Observed  | Mr(expt)  | Mr(calc)  | ppm  | Start | End | Miss | Ions | Peptide             |
|-----------|-----------|-----------|------|-------|-----|------|------|---------------------|
| 837.5072  | 836.4999  | 836.4868  | 15.7 | 118   | 124 | 0    | ---  | R.EHILLGR.Q         |
| 1027.6166 | 1026.6093 | 1026.5822 | 26.4 | 271   | 280 | 0    | ---  | R.AGENVGVLLR.G      |
| 1214.6581 | 1213.6508 | 1213.6230 | 22.9 | 305   | 314 | 0    | ---  | K.FESEVYILSK.D      |
| 1233.6701 | 1232.6629 | 1232.6091 | 43.6 | 326   | 334 | 0    | 15   | K.GYRPFYFR.T        |
| 1315.7305 | 1314.7232 | 1314.6060 | 89.1 | 254   | 264 | 1    | ---  | K.STCTGVEMFRK.L     |
| 1574.9723 | 1573.9650 | 1573.9304 | 22.0 | 290   | 304 | 0    | ---  | R.GQVLAKPGTIKPHTK.F |

1728.9325 1727.9253 1727.8366 51.3 305 - 319 1 --- K.FESEVYILSKDEGGR.H  
 1797.0350 1796.0277 1795.9325 53.1 359 - 374 0 --- K.MVVTLIHPIAMDDGLR.F + Oxidation (M)  
 1803.9918 1802.9845 1802.8799 58.0 60 - 75 0 --- R.GITINTSHVEYDTPTR.H  
 1965.1206 1964.1134 1963.9527 81.8 156 - 172 0 44 R.ELLSQYDFPGDDTPIVR.G  
 2117.3190 2116.3117 2116.1568 73.2 206 - 224 0 28 R.AIDKPFLLPIEDVFSISGR.G

No match to: 723.3202, 725.3349, 790.4618, 804.3175, 832.3504, 848.3077, 855.0634, 861.0816, 877.0593, 879.0642, 893.0384, 897.0395, 930.4819, 941.5245, 965.5432, 985.5503, 1001.5439, 1046.5846, 1179.6348, 1193.6685, 1219.5995, 1255.6486, 1269.6710, 1271.6285, 1277.6571, 1296.7322, 1320.6617, 1326.7448, 1348.7190, 1368.7612, 1450.7841, 1472.8880, 1475.8216, 1477.7796, 1494.8828, 1497.7996, 1509.8403, 1511.9038, 1527.8609, 1550.8947, 1598.9195, 1617.8806, 1631.8934, 1654.9031, 1707.9342, 1712.9042, 1733.0067, 1749.9856, 1755.9948, 1818.0212, 1866.0850, 1898.0605, 1915.0945, 1931.0593, 1947.0781, 1949.0662, 1967.1856, 1981.0932, 1988.1120, 1994.1406, 2005.1346, 2010.0916, 2139.2472, 2211.2249, 2229.2467, 2233.2426, 2271.2633, 2384.1999, 2399.2428, 2439.4144, 2451.4028, 2498.4046, 2615.4719, 2705.3847, 2808.6002, 3284.5981

7. [EFTU1 ECOUT](#) Mass: 43427 Score: 138 Expect: 5.3e-09 Matches: 11

Elongation factor Tu 1 OS=Escherichia coli (strain UTI89 / UPEC) OX=364106 GN=tuf1 PE=1 SV=1

| Observed  | Mr (expt) | Mr (calc) | ppm  | Start | End | Miss | Ions | Peptide                              |
|-----------|-----------|-----------|------|-------|-----|------|------|--------------------------------------|
| 837.5072  | 836.4999  | 836.4868  | 15.7 | 118   | 124 | 0    | ---  | R.EHILLGR.Q                          |
| 1027.6166 | 1026.6093 | 1026.5822 | 26.4 | 271   | 280 | 0    | ---  | R.AGENVGVLLR.G                       |
| 1214.6581 | 1213.6508 | 1213.6230 | 22.9 | 305   | 314 | 0    | ---  | K.FESEVYILSK.D                       |
| 1233.6701 | 1232.6629 | 1232.6091 | 43.6 | 326   | 334 | 0    | 15   | K.GYRPFYFR.T                         |
| 1315.7305 | 1314.7232 | 1314.6060 | 89.1 | 254   | 264 | 1    | ---  | K.STCTGVEMFRK.L                      |
| 1574.9723 | 1573.9650 | 1573.9304 | 22.0 | 290   | 304 | 0    | ---  | R.GQVLAKPGTIKPHTK.F                  |
| 1728.9325 | 1727.9253 | 1727.8366 | 51.3 | 305   | 319 | 1    | ---  | K.FESEVYILSKDEGGR.H                  |
| 1797.0350 | 1796.0277 | 1795.9325 | 53.1 | 359   | 374 | 0    | ---  | K.MVVTLIHPIAMDDGLR.F + Oxidation (M) |
| 1803.9918 | 1802.9845 | 1802.8799 | 58.0 | 60    | 75  | 0    | ---  | R.GITINTSHVEYDTPTR.H                 |
| 1965.1206 | 1964.1134 | 1963.9527 | 81.8 | 156   | 172 | 0    | 44   | R.ELLSQYDFPGDDTPIVR.G                |
| 2117.3190 | 2116.3117 | 2116.1568 | 73.2 | 206   | 224 | 0    | 28   | R.AIDKPFLLPIEDVFSISGR.G              |

No match to: 723.3202, 725.3349, 790.4618, 804.3175, 832.3504, 848.3077, 855.0634, 861.0816, 877.0593, 879.0642, 893.0384, 897.0395, 930.4819, 941.5245, 965.5432, 985.5503, 1001.5439, 1046.5846, 1179.6348, 1193.6685, 1219.5995, 1255.6486, 1269.6710, 1271.6285, 1277.6571, 1296.7322, 1320.6617, 1326.7448, 1348.7190, 1368.7612, 1450.7841, 1472.8880, 1475.8216, 1477.7796, 1494.8828, 1497.7996, 1509.8403, 1511.9038, 1527.8609, 1550.8947, 1598.9195, 1617.8806, 1631.8934, 1654.9031, 1707.9342, 1712.9042, 1733.0067, 1749.9856, 1755.9948, 1818.0212, 1866.0850, 1898.0605, 1915.0945, 1931.0593, 1947.0781, 1949.0662, 1967.1856, 1981.0932, 1988.1120, 1994.1406, 2005.1346, 2010.0916, 2139.2472, 2211.2249, 2229.2467, 2233.2426, 2271.2633, 2384.1999, 2399.2428, 2439.4144, 2451.4028, 2498.4046, 2615.4719, 2705.3847, 2808.6002, 3284.5981

8. [EFTU1 SHIF8](#) Mass: 43426 Score: 138 Expect: 5.3e-09 Matches: 11

Elongation factor Tu 1 OS=Shigella flexneri serotype 5b (strain 8401) OX=373384 GN=tuf1 PE=3 SV=1

| Observed  | Mr (expt) | Mr (calc) | ppm  | Start | End | Miss | Ions | Peptide                              |
|-----------|-----------|-----------|------|-------|-----|------|------|--------------------------------------|
| 837.5072  | 836.4999  | 836.4868  | 15.7 | 118   | 124 | 0    | ---  | R.EHILLGR.Q                          |
| 1027.6166 | 1026.6093 | 1026.5822 | 26.4 | 271   | 280 | 0    | ---  | R.AGENVGVLLR.G                       |
| 1214.6581 | 1213.6508 | 1213.6230 | 22.9 | 305   | 314 | 0    | ---  | K.FESEVYILSK.D                       |
| 1233.6701 | 1232.6629 | 1232.6091 | 43.6 | 326   | 334 | 0    | 15   | K.GYRPFYFR.T                         |
| 1315.7305 | 1314.7232 | 1314.6060 | 89.1 | 254   | 264 | 1    | ---  | K.STCTGVEMFRK.L                      |
| 1574.9723 | 1573.9650 | 1573.9304 | 22.0 | 290   | 304 | 0    | ---  | R.GQVLAKPGTIKPHTK.F                  |
| 1728.9325 | 1727.9253 | 1727.8366 | 51.3 | 305   | 319 | 1    | ---  | K.FESEVYILSKDEGGR.H                  |
| 1797.0350 | 1796.0277 | 1795.9325 | 53.1 | 359   | 374 | 0    | ---  | K.MVVTLIHPIAMDDGLR.F + Oxidation (M) |
| 1803.9918 | 1802.9845 | 1802.8799 | 58.0 | 60    | 75  | 0    | ---  | R.GITINTSHVEYDTPTR.H                 |
| 1965.1206 | 1964.1134 | 1963.9527 | 81.8 | 156   | 172 | 0    | 44   | R.ELLSQYDFPGDDTPIVR.G                |
| 2117.3190 | 2116.3117 | 2116.1568 | 73.2 | 206   | 224 | 0    | 28   | R.AIDKPFLLPIEDVFSISGR.G              |

No match to: 723.3202, 725.3349, 790.4618, 804.3175, 832.3504, 848.3077, 855.0634, 861.0816, 877.0593, 879.0642, 893.0384, 897.0395, 930.4819, 941.5245, 965.5432, 985.5503, 1001.5439, 1046.5846, 1179.6348, 1193.6685, 1219.5995, 1255.6486, 1269.6710, 1271.6285, 1277.6571, 1296.7322, 1320.6617, 1326.7448, 1348.7190, 1368.7612, 1450.7841, 1472.8880, 1475.8216, 1477.7796, 1494.8828, 1497.7996, 1509.8403, 1511.9038, 1527.8609, 1550.8947, 1598.9195, 1617.8806, 1631.8934, 1654.9031, 1707.9342, 1712.9042, 1733.0067, 1749.9856, 1755.9948, 1818.0212, 1866.0850, 1898.0605, 1915.0945, 1931.0593, 1947.0781, 1949.0662, 1967.1856, 1981.0932, 1988.1120, 1994.1406, 2005.1346, 2010.0916, 2139.2472, 2211.2249, 2229.2467, 2233.2426, 2271.2633, 2384.1999, 2399.2428, 2439.4144, 2451.4028, 2498.4046, 2615.4719, 2705.3847, 2808.6002, 3284.5981

9. [EFTU1 SHISS](#) Mass: 43427 Score: 138 Expect: 5.3e-09 Matches: 11

Elongation factor Tu 1 OS=Shigella sonnei (strain Ss046) OX=300269 GN=tuf1 PE=3 SV=1

| Observed  | Mr (expt) | Mr (calc) | ppm  | Start | End | Miss | Ions | Peptide                              |
|-----------|-----------|-----------|------|-------|-----|------|------|--------------------------------------|
| 837.5072  | 836.4999  | 836.4868  | 15.7 | 118   | 124 | 0    | ---  | R.EHILLGR.Q                          |
| 1027.6166 | 1026.6093 | 1026.5822 | 26.4 | 271   | 280 | 0    | ---  | R.AGENVGVLLR.G                       |
| 1214.6581 | 1213.6508 | 1213.6230 | 22.9 | 305   | 314 | 0    | ---  | K.FESEVYILSK.D                       |
| 1233.6701 | 1232.6629 | 1232.6091 | 43.6 | 326   | 334 | 0    | 15   | K.GYRPFYFR.T                         |
| 1315.7305 | 1314.7232 | 1314.6060 | 89.1 | 254   | 264 | 1    | ---  | K.STCTGVEMFRK.L                      |
| 1574.9723 | 1573.9650 | 1573.9304 | 22.0 | 290   | 304 | 0    | ---  | R.GQVLAKPGTIKPHTK.F                  |
| 1728.9325 | 1727.9253 | 1727.8366 | 51.3 | 305   | 319 | 1    | ---  | K.FESEVYILSKDEGGR.H                  |
| 1797.0350 | 1796.0277 | 1795.9325 | 53.1 | 359   | 374 | 0    | ---  | K.MVVTLIHPIAMDDGLR.F + Oxidation (M) |
| 1803.9918 | 1802.9845 | 1802.8799 | 58.0 | 60    | 75  | 0    | ---  | R.GITINTSHVEYDTPTR.H                 |
| 1965.1206 | 1964.1134 | 1963.9527 | 81.8 | 156   | 172 | 0    | 44   | R.ELLSQYDFPGDDTPIVR.G                |
| 2117.3190 | 2116.3117 | 2116.1568 | 73.2 | 206   | 224 | 0    | 28   | R.AIDKPFLLPIEDVFSISGR.G              |

No match to: 723.3202, 725.3349, 790.4618, 804.3175, 832.3504, 848.3077, 855.0634, 861.0816, 877.0593, 879.0642, 893.0384, 897.0395, 930.4819, 941.5245, 965.5432, 985.5503, 1001.5439, 1046.5846, 1179.6348, 1193.6685, 1219.5995, 1255.6486, 1269.6710, 1271.6285, 1277.6571, 1296.7322, 1320.6617, 1326.7448, 1348.7190, 1368.7612, 1450.7841, 1472.8880, 1475.8216, 1477.7796, 1494.8828, 1497.7996, 1509.8403, 1511.9038, 1527.8609, 1550.8947, 1598.9195, 1617.8806, 1631.8934, 1654.9031, 1707.9342, 1712.9042, 1733.0067, 1749.9856, 1755.9948, 1818.0212, 1866.0850, 1898.0605, 1915.0945, 1931.0593, 1947.0781, 1949.0662, 1967.1856, 1981.0932, 1988.1120, 1994.1406, 2005.1346, 2010.0916, 2139.2472, 2211.2249, 2229.2467, 2233.2426, 2271.2633, 2384.1999, 2399.2428, 2439.4144, 2451.4028, 2498.4046, 2615.4719, 2705.3847, 2808.6002, 3284.5981

10. [EFTU2 ECO24](#) Mass: 43456 Score: 138 Expect: 5.3e-09 Matches: 11

Elongation factor Tu 2 OS=Escherichia coli O139:H28 (strain E24377A / ETEC) OX=331111 GN=tuf2 PE=3 SV=1

| Observed  | Mr (expt) | Mr (calc) | ppm  | Start | End | Miss | Ions | Peptide                              |
|-----------|-----------|-----------|------|-------|-----|------|------|--------------------------------------|
| 837.5072  | 836.4999  | 836.4868  | 15.7 | 118   | 124 | 0    | ---  | R.EHILLGR.Q                          |
| 1027.6166 | 1026.6093 | 1026.5822 | 26.4 | 271   | 280 | 0    | ---  | R.AGENVGVLLR.G                       |
| 1214.6581 | 1213.6508 | 1213.6230 | 22.9 | 305   | 314 | 0    | ---  | K.FESEVYILSK.D                       |
| 1233.6701 | 1232.6629 | 1232.6091 | 43.6 | 326   | 334 | 0    | 15   | K.GYRPFYFR.T                         |
| 1315.7305 | 1314.7232 | 1314.6060 | 89.1 | 254   | 264 | 1    | ---  | K.STCTGVEMFRK.L                      |
| 1574.9723 | 1573.9650 | 1573.9304 | 22.0 | 290   | 304 | 0    | ---  | R.GQVLAKPGTIKPHTK.F                  |
| 1728.9325 | 1727.9253 | 1727.8366 | 51.3 | 305   | 319 | 1    | ---  | K.FESEVYILSKDEGGR.H                  |
| 1797.0350 | 1796.0277 | 1795.9325 | 53.1 | 359   | 374 | 0    | ---  | K.MVVTLIHPIAMDDGLR.F + Oxidation (M) |
| 1803.9918 | 1802.9845 | 1802.8799 | 58.0 | 60    | 75  | 0    | ---  | R.GITINTSHVEYDTPTR.H                 |
| 1965.1206 | 1964.1134 | 1963.9527 | 81.8 | 156   | 172 | 0    | 44   | R.ELLSQYDFPGDDTPIVR.G                |
| 2117.3190 | 2116.3117 | 2116.1568 | 73.2 | 206   | 224 | 0    | 28   | R.AIDKPFLLPIEDVFSISGR.G              |

**No match to:** 723.3202, 725.3349, 790.4618, 804.3175, 832.3504, 848.3077, 855.0634, 861.0816, 877.0593, 879.0642, 893.0384, 897.0395, 930.4819, 941.5245, 965.5432, 985.5503, 1001.5439, 1046.5846, 1179.6348, 1193.6685, 1219.5995, 1255.6486, 1269.6710, 1271.6285, 1277.6571, 1296.7322, 1320.6617, 1326.7448, 1348.7190, 1368.7612, 1450.7841, 1472.8880, 1475.8216, 1477.7796, 1494.8828, 1497.7996, 1509.8403, 1511.9038, 1527.8609, 1550.8947, 1598.9195, 1617.8806, 1631.8934, 1654.9031, 1707.9342, 1712.9042, 1733.0067, 1749.9856, 1755.9948, 1818.0212, 1866.0850, 1898.0605, 1915.0945, 1931.0593, 1947.0781, 1949.0662, 1967.1856, 1981.0932, 1988.1120, 1994.1406, 2005.1346, 2010.0916, 2139.2472, 2211.2249, 2229.2467, 2233.2426, 2271.2633, 2384.1999, 2399.2428, 2439.4144, 2451.4028, 2498.4046, 2615.4719, 2705.3847, 2808.6002, 3284.5981

11. [EFTU2\\_ECOHS](#) Mass: 43457 Score: 138 Expect: 5.3e-09 Matches: 11  
 Elongation factor Tu 2 OS=Escherichia coli O9:H4 (strain HS) OX=331112 GN=tuf2 PE=3 SV=1
- | Observed  | Mr (expt) | Mr (calc) | ppm  | Start | End | Miss | Ions | Peptide                                  |
|-----------|-----------|-----------|------|-------|-----|------|------|------------------------------------------|
| 837.5072  | 836.4999  | 836.4868  | 15.7 | 118   | -   | 124  | 0    | R.EHILLGR.Q                              |
| 1027.6166 | 1026.6093 | 1026.5822 | 26.4 | 271   | -   | 280  | 0    | R.AGENVGVLLR.G                           |
| 1214.6581 | 1213.6508 | 1213.6230 | 22.9 | 305   | -   | 314  | 0    | K.FESEVYILSK.D                           |
| 1233.6701 | 1232.6629 | 1232.6091 | 43.6 | 326   | -   | 334  | 0    | 15 K.GYRPFYFR.T                          |
| 1315.7305 | 1314.7232 | 1314.6060 | 89.1 | 254   | -   | 264  | 1    | --- K.STCTGVEMFRK.L                      |
| 1574.9723 | 1573.9650 | 1573.9304 | 22.0 | 290   | -   | 304  | 0    | --- R.GQVLAKPPTIKPHTK.F                  |
| 1728.9325 | 1727.9253 | 1727.8366 | 51.3 | 305   | -   | 319  | 1    | --- K.FESEVYILSKDEGGR.H                  |
| 1797.0350 | 1796.0277 | 1795.9325 | 53.1 | 359   | -   | 374  | 0    | --- K.MVVTLIHPIAMDDGLR.F + Oxidation (M) |
| 1803.9918 | 1802.9845 | 1802.8799 | 58.0 | 60    | -   | 75   | 0    | --- R.GITINTSHVEYDTPTR.H                 |
| 1965.1206 | 1964.1134 | 1963.9527 | 81.8 | 156   | -   | 172  | 0    | 44 R.ELLSQYDFPGDDTPIVR.G                 |
| 2117.3190 | 2116.3117 | 2116.1568 | 73.2 | 206   | -   | 224  | 0    | 28 R.AIDKPFLLPIEDVFSISGR.G               |
- No match to:** 723.3202, 725.3349, 790.4618, 804.3175, 832.3504, 848.3077, 855.0634, 861.0816, 877.0593, 879.0642, 893.0384, 897.0395, 930.4819, 941.5245, 965.5432, 985.5503, 1001.5439, 1046.5846, 1179.6348, 1193.6685, 1219.5995, 1255.6486, 1269.6710, 1271.6285, 1277.6571, 1296.7322, 1320.6617, 1326.7448, 1348.7190, 1368.7612, 1450.7841, 1472.8880, 1475.8216, 1477.7796, 1494.8828, 1497.7996, 1509.8403, 1511.9038, 1527.8609, 1550.8947, 1598.9195, 1617.8806, 1631.8934, 1654.9031, 1707.9342, 1712.9042, 1733.0067, 1749.9856, 1755.9948, 1818.0212, 1866.0850, 1898.0605, 1915.0945, 1931.0593, 1947.0781, 1949.0662, 1967.1856, 1981.0932, 1988.1120, 1994.1406, 2005.1346, 2010.0916, 2139.2472, 2211.2249, 2229.2467, 2233.2426, 2271.2633, 2384.1999, 2399.2428, 2439.4144, 2451.4028, 2498.4046, 2615.4719, 2705.3847, 2808.6002, 3284.5981
12. [EFTU2\\_ECOK1](#) Mass: 43457 Score: 138 Expect: 5.3e-09 Matches: 11  
 Elongation factor Tu 2 OS=Escherichia coli O1:K1 / APEC OX=405955 GN=tuf2 PE=3 SV=1
- | Observed  | Mr (expt) | Mr (calc) | ppm  | Start | End | Miss | Ions | Peptide                                  |
|-----------|-----------|-----------|------|-------|-----|------|------|------------------------------------------|
| 837.5072  | 836.4999  | 836.4868  | 15.7 | 118   | -   | 124  | 0    | R.EHILLGR.Q                              |
| 1027.6166 | 1026.6093 | 1026.5822 | 26.4 | 271   | -   | 280  | 0    | R.AGENVGVLLR.G                           |
| 1214.6581 | 1213.6508 | 1213.6230 | 22.9 | 305   | -   | 314  | 0    | K.FESEVYILSK.D                           |
| 1233.6701 | 1232.6629 | 1232.6091 | 43.6 | 326   | -   | 334  | 0    | 15 K.GYRPFYFR.T                          |
| 1315.7305 | 1314.7232 | 1314.6060 | 89.1 | 254   | -   | 264  | 1    | --- K.STCTGVEMFRK.L                      |
| 1574.9723 | 1573.9650 | 1573.9304 | 22.0 | 290   | -   | 304  | 0    | --- R.GQVLAKPPTIKPHTK.F                  |
| 1728.9325 | 1727.9253 | 1727.8366 | 51.3 | 305   | -   | 319  | 1    | --- K.FESEVYILSKDEGGR.H                  |
| 1797.0350 | 1796.0277 | 1795.9325 | 53.1 | 359   | -   | 374  | 0    | --- K.MVVTLIHPIAMDDGLR.F + Oxidation (M) |
| 1803.9918 | 1802.9845 | 1802.8799 | 58.0 | 60    | -   | 75   | 0    | --- R.GITINTSHVEYDTPTR.H                 |
| 1965.1206 | 1964.1134 | 1963.9527 | 81.8 | 156   | -   | 172  | 0    | 44 R.ELLSQYDFPGDDTPIVR.G                 |
| 2117.3190 | 2116.3117 | 2116.1568 | 73.2 | 206   | -   | 224  | 0    | 28 R.AIDKPFLLPIEDVFSISGR.G               |
- No match to:** 723.3202, 725.3349, 790.4618, 804.3175, 832.3504, 848.3077, 855.0634, 861.0816, 877.0593, 879.0642, 893.0384, 897.0395, 930.4819, 941.5245, 965.5432, 985.5503, 1001.5439, 1046.5846, 1179.6348, 1193.6685, 1219.5995, 1255.6486, 1269.6710, 1271.6285, 1277.6571, 1296.7322, 1320.6617, 1326.7448, 1348.7190, 1368.7612, 1450.7841, 1472.8880, 1475.8216, 1477.7796, 1494.8828, 1497.7996, 1509.8403, 1511.9038, 1527.8609, 1550.8947, 1598.9195, 1617.8806, 1631.8934, 1654.9031, 1707.9342, 1712.9042, 1733.0067, 1749.9856, 1755.9948, 1818.0212, 1866.0850, 1898.0605, 1915.0945, 1931.0593, 1947.0781, 1949.0662, 1967.1856, 1981.0932, 1988.1120, 1994.1406, 2005.1346, 2010.0916, 2139.2472, 2211.2249, 2229.2467, 2233.2426, 2271.2633, 2384.1999, 2399.2428, 2439.4144, 2451.4028, 2498.4046, 2615.4719, 2705.3847, 2808.6002, 3284.5981
13. [EFTU2\\_ECOL5](#) Mass: 43457 Score: 138 Expect: 5.3e-09 Matches: 11  
 Elongation factor Tu 2 OS=Escherichia coli O6:K15:H31 (strain 536 / UPEC) OX=362663 GN=tuf2 PE=3 SV=1
- | Observed  | Mr (expt) | Mr (calc) | ppm  | Start | End | Miss | Ions | Peptide                                  |
|-----------|-----------|-----------|------|-------|-----|------|------|------------------------------------------|
| 837.5072  | 836.4999  | 836.4868  | 15.7 | 118   | -   | 124  | 0    | R.EHILLGR.Q                              |
| 1027.6166 | 1026.6093 | 1026.5822 | 26.4 | 271   | -   | 280  | 0    | R.AGENVGVLLR.G                           |
| 1214.6581 | 1213.6508 | 1213.6230 | 22.9 | 305   | -   | 314  | 0    | K.FESEVYILSK.D                           |
| 1233.6701 | 1232.6629 | 1232.6091 | 43.6 | 326   | -   | 334  | 0    | 15 K.GYRPFYFR.T                          |
| 1315.7305 | 1314.7232 | 1314.6060 | 89.1 | 254   | -   | 264  | 1    | --- K.STCTGVEMFRK.L                      |
| 1574.9723 | 1573.9650 | 1573.9304 | 22.0 | 290   | -   | 304  | 0    | --- R.GQVLAKPPTIKPHTK.F                  |
| 1728.9325 | 1727.9253 | 1727.8366 | 51.3 | 305   | -   | 319  | 1    | --- K.FESEVYILSKDEGGR.H                  |
| 1797.0350 | 1796.0277 | 1795.9325 | 53.1 | 359   | -   | 374  | 0    | --- K.MVVTLIHPIAMDDGLR.F + Oxidation (M) |
| 1803.9918 | 1802.9845 | 1802.8799 | 58.0 | 60    | -   | 75   | 0    | --- R.GITINTSHVEYDTPTR.H                 |
| 1965.1206 | 1964.1134 | 1963.9527 | 81.8 | 156   | -   | 172  | 0    | 44 R.ELLSQYDFPGDDTPIVR.G                 |
| 2117.3190 | 2116.3117 | 2116.1568 | 73.2 | 206   | -   | 224  | 0    | 28 R.AIDKPFLLPIEDVFSISGR.G               |
- No match to:** 723.3202, 725.3349, 790.4618, 804.3175, 832.3504, 848.3077, 855.0634, 861.0816, 877.0593, 879.0642, 893.0384, 897.0395, 930.4819, 941.5245, 965.5432, 985.5503, 1001.5439, 1046.5846, 1179.6348, 1193.6685, 1219.5995, 1255.6486, 1269.6710, 1271.6285, 1277.6571, 1296.7322, 1320.6617, 1326.7448, 1348.7190, 1368.7612, 1450.7841, 1472.8880, 1475.8216, 1477.7796, 1494.8828, 1497.7996, 1509.8403, 1511.9038, 1527.8609, 1550.8947, 1598.9195, 1617.8806, 1631.8934, 1654.9031, 1707.9342, 1712.9042, 1733.0067, 1749.9856, 1755.9948, 1818.0212, 1866.0850, 1898.0605, 1915.0945, 1931.0593, 1947.0781, 1949.0662, 1967.1856, 1981.0932, 1988.1120, 1994.1406, 2005.1346, 2010.0916, 2139.2472, 2211.2249, 2229.2467, 2233.2426, 2271.2633, 2384.1999, 2399.2428, 2439.4144, 2451.4028, 2498.4046, 2615.4719, 2705.3847, 2808.6002, 3284.5981
14. [EFTU2\\_ECOLC](#) Mass: 43457 Score: 138 Expect: 5.3e-09 Matches: 11  
 Elongation factor Tu 2 OS=Escherichia coli (strain ATCC 8739 / DSM 1576 / Crooks) OX=481805 GN=tuf2 PE=3 SV=1
- | Observed  | Mr (expt) | Mr (calc) | ppm  | Start | End | Miss | Ions | Peptide                                  |
|-----------|-----------|-----------|------|-------|-----|------|------|------------------------------------------|
| 837.5072  | 836.4999  | 836.4868  | 15.7 | 118   | -   | 124  | 0    | R.EHILLGR.Q                              |
| 1027.6166 | 1026.6093 | 1026.5822 | 26.4 | 271   | -   | 280  | 0    | R.AGENVGVLLR.G                           |
| 1214.6581 | 1213.6508 | 1213.6230 | 22.9 | 305   | -   | 314  | 0    | K.FESEVYILSK.D                           |
| 1233.6701 | 1232.6629 | 1232.6091 | 43.6 | 326   | -   | 334  | 0    | 15 K.GYRPFYFR.T                          |
| 1315.7305 | 1314.7232 | 1314.6060 | 89.1 | 254   | -   | 264  | 1    | --- K.STCTGVEMFRK.L                      |
| 1574.9723 | 1573.9650 | 1573.9304 | 22.0 | 290   | -   | 304  | 0    | --- R.GQVLAKPPTIKPHTK.F                  |
| 1728.9325 | 1727.9253 | 1727.8366 | 51.3 | 305   | -   | 319  | 1    | --- K.FESEVYILSKDEGGR.H                  |
| 1797.0350 | 1796.0277 | 1795.9325 | 53.1 | 359   | -   | 374  | 0    | --- K.MVVTLIHPIAMDDGLR.F + Oxidation (M) |
| 1803.9918 | 1802.9845 | 1802.8799 | 58.0 | 60    | -   | 75   | 0    | --- R.GITINTSHVEYDTPTR.H                 |
| 1965.1206 | 1964.1134 | 1963.9527 | 81.8 | 156   | -   | 172  | 0    | 44 R.ELLSQYDFPGDDTPIVR.G                 |
| 2117.3190 | 2116.3117 | 2116.1568 | 73.2 | 206   | -   | 224  | 0    | 28 R.AIDKPFLLPIEDVFSISGR.G               |
- No match to:** 723.3202, 725.3349, 790.4618, 804.3175, 832.3504, 848.3077, 855.0634, 861.0816, 877.0593, 879.0642, 893.0384, 897.0395, 930.4819, 941.5245, 965.5432, 985.5503, 1001.5439, 1046.5846, 1179.6348, 1193.6685, 1219.5995, 1255.6486, 1269.6710, 1271.6285, 1277.6571, 1296.7322, 1320.6617, 1326.7448, 1348.7190, 1368.7612, 1450.7841, 1472.8880, 1475.8216, 1477.7796, 1494.8828, 1497.7996, 1509.8403, 1511.9038, 1527.8609, 1550.8947, 1598.9195, 1617.8806, 1631.8934, 1654.9031, 1707.9342, 1712.9042, 1733.0067, 1749.9856, 1755.9948, 1818.0212, 1866.0850, 1898.0605, 1915.0945, 1931.0593, 1947.0781, 1949.0662, 1967.1856, 1981.0932, 1988.1120, 1994.1406, 2005.1346, 2010.0916, 2139.2472, 2211.2249, 2229.2467, 2233.2426, 2271.2633, 2384.1999, 2399.2428, 2439.4144, 2451.4028, 2498.4046, 2615.4719, 2705.3847, 2808.6002, 3284.5981

15. EFTU2\_ECOLI Mass: 43457 Score: 138 Expect: 5.3e-09 Matches: 11  
Elongation factor Tu 2 OS=Escherichia coli (strain K12) OX=83333 GN=tufB PE=1 SV=1
- | Observed  | Mr (expt) | Mr (calc) | ppm  | Start | End | Miss | Ions | Peptide                            |
|-----------|-----------|-----------|------|-------|-----|------|------|------------------------------------|
| 837.5072  | 836.4999  | 836.4868  | 15.7 | 118   | 124 | 0    | ---  | R.EHILLGR.Q                        |
| 1027.6166 | 1026.6093 | 1026.5822 | 26.4 | 271   | 280 | 0    | ---  | R.AGENVGVLLR.G                     |
| 1214.6581 | 1213.6508 | 1213.6230 | 22.9 | 305   | 314 | 0    | ---  | K.FESEVYILSK.D                     |
| 1233.6701 | 1232.6629 | 1232.6091 | 43.6 | 326   | 334 | 0    | 15   | K.GYRPFYFR.T                       |
| 1315.7305 | 1314.7232 | 1314.6060 | 89.1 | 254   | 264 | 1    | ---  | K.STCTGVEMFRK.L                    |
| 1574.9723 | 1573.9650 | 1573.9304 | 22.0 | 290   | 304 | 0    | ---  | R.GQVLAKPGTIKPHTK.F                |
| 1728.9325 | 1727.9253 | 1727.8366 | 51.3 | 305   | 319 | 1    | ---  | K.FESEVYILSKDEGGR.H                |
| 1797.0350 | 1796.0277 | 1795.9325 | 53.1 | 359   | 374 | 0    | ---  | K.MVVTLIHPAMDGLR.F + Oxidation (M) |
| 1803.9918 | 1802.9845 | 1802.8799 | 58.0 | 60    | 75  | 0    | ---  | R.GITINTSHVEYDTPTR.H               |
| 1965.1206 | 1964.1134 | 1963.9527 | 81.8 | 156   | 172 | 0    | 44   | R.ELLSQYDFPGDDTPIVR.G              |
| 2117.3190 | 2116.3117 | 2116.1568 | 73.2 | 206   | 224 | 0    | 28   | R.AIDKPFLLPIEDVFSISGR.G            |
- No match to: 723.3202, 725.3349, 790.4618, 804.3175, 832.3504, 848.3077, 855.0634, 861.0816, 877.0593, 879.0642, 893.0384, 897.0395, 930.4819, 941.5245, 965.5432, 985.5503, 1001.5439, 1046.5846, 1179.6348, 1193.6685, 1219.5995, 1255.6486, 1269.6710, 1271.6285, 1277.6571, 1296.7322, 1320.6617, 1326.7448, 1348.7190, 1368.7612, 1450.7841, 1472.8880, 1475.8216, 1477.7796, 1494.8828, 1497.7996, 1509.8403, 1511.9038, 1527.8609, 1550.8947, 1598.9195, 1617.8806, 1631.8934, 1654.9031, 1707.9342, 1712.9042, 1733.0067, 1749.9856, 1755.9948, 1818.0212, 1866.0850, 1898.0605, 1915.0945, 1931.0593, 1947.0781, 1949.0662, 1967.1856, 1981.0932, 1988.1120, 1994.1406, 2005.1346, 2010.0916, 2139.2472, 2211.2249, 2229.2467, 2233.2426, 2271.2633, 2384.1999, 2399.2428, 2439.4144, 2451.4028, 2498.4046, 2615.4719, 2705.3847, 2808.6002, 3284.5981
16. EFTU2\_ECOUT Mass: 43457 Score: 138 Expect: 5.3e-09 Matches: 11  
Elongation factor Tu 2 OS=Escherichia coli (strain UTI89 / UPEC) OX=364106 GN=tuf2 PE=3 SV=2
- | Observed  | Mr (expt) | Mr (calc) | ppm  | Start | End | Miss | Ions | Peptide                            |
|-----------|-----------|-----------|------|-------|-----|------|------|------------------------------------|
| 837.5072  | 836.4999  | 836.4868  | 15.7 | 118   | 124 | 0    | ---  | R.EHILLGR.Q                        |
| 1027.6166 | 1026.6093 | 1026.5822 | 26.4 | 271   | 280 | 0    | ---  | R.AGENVGVLLR.G                     |
| 1214.6581 | 1213.6508 | 1213.6230 | 22.9 | 305   | 314 | 0    | ---  | K.FESEVYILSK.D                     |
| 1233.6701 | 1232.6629 | 1232.6091 | 43.6 | 326   | 334 | 0    | 15   | K.GYRPFYFR.T                       |
| 1315.7305 | 1314.7232 | 1314.6060 | 89.1 | 254   | 264 | 1    | ---  | K.STCTGVEMFRK.L                    |
| 1574.9723 | 1573.9650 | 1573.9304 | 22.0 | 290   | 304 | 0    | ---  | R.GQVLAKPGTIKPHTK.F                |
| 1728.9325 | 1727.9253 | 1727.8366 | 51.3 | 305   | 319 | 1    | ---  | K.FESEVYILSKDEGGR.H                |
| 1797.0350 | 1796.0277 | 1795.9325 | 53.1 | 359   | 374 | 0    | ---  | K.MVVTLIHPAMDGLR.F + Oxidation (M) |
| 1803.9918 | 1802.9845 | 1802.8799 | 58.0 | 60    | 75  | 0    | ---  | R.GITINTSHVEYDTPTR.H               |
| 1965.1206 | 1964.1134 | 1963.9527 | 81.8 | 156   | 172 | 0    | 44   | R.ELLSQYDFPGDDTPIVR.G              |
| 2117.3190 | 2116.3117 | 2116.1568 | 73.2 | 206   | 224 | 0    | 28   | R.AIDKPFLLPIEDVFSISGR.G            |
- No match to: 723.3202, 725.3349, 790.4618, 804.3175, 832.3504, 848.3077, 855.0634, 861.0816, 877.0593, 879.0642, 893.0384, 897.0395, 930.4819, 941.5245, 965.5432, 985.5503, 1001.5439, 1046.5846, 1179.6348, 1193.6685, 1219.5995, 1255.6486, 1269.6710, 1271.6285, 1277.6571, 1296.7322, 1320.6617, 1326.7448, 1348.7190, 1368.7612, 1450.7841, 1472.8880, 1475.8216, 1477.7796, 1494.8828, 1497.7996, 1509.8403, 1511.9038, 1527.8609, 1550.8947, 1598.9195, 1617.8806, 1631.8934, 1654.9031, 1707.9342, 1712.9042, 1733.0067, 1749.9856, 1755.9948, 1818.0212, 1866.0850, 1898.0605, 1915.0945, 1931.0593, 1947.0781, 1949.0662, 1967.1856, 1981.0932, 1988.1120, 1994.1406, 2005.1346, 2010.0916, 2139.2472, 2211.2249, 2229.2467, 2233.2426, 2271.2633, 2384.1999, 2399.2428, 2439.4144, 2451.4028, 2498.4046, 2615.4719, 2705.3847, 2808.6002, 3284.5981
17. EFTU2\_SHIF8 Mass: 43457 Score: 138 Expect: 5.3e-09 Matches: 11  
Elongation factor Tu 2 OS=Shigella flexneri serotype 5b (strain 8401) OX=373384 GN=tuf2 PE=3 SV=1
- | Observed  | Mr (expt) | Mr (calc) | ppm  | Start | End | Miss | Ions | Peptide                            |
|-----------|-----------|-----------|------|-------|-----|------|------|------------------------------------|
| 837.5072  | 836.4999  | 836.4868  | 15.7 | 118   | 124 | 0    | ---  | R.EHILLGR.Q                        |
| 1027.6166 | 1026.6093 | 1026.5822 | 26.4 | 271   | 280 | 0    | ---  | R.AGENVGVLLR.G                     |
| 1214.6581 | 1213.6508 | 1213.6230 | 22.9 | 305   | 314 | 0    | ---  | K.FESEVYILSK.D                     |
| 1233.6701 | 1232.6629 | 1232.6091 | 43.6 | 326   | 334 | 0    | 15   | K.GYRPFYFR.T                       |
| 1315.7305 | 1314.7232 | 1314.6060 | 89.1 | 254   | 264 | 1    | ---  | K.STCTGVEMFRK.L                    |
| 1574.9723 | 1573.9650 | 1573.9304 | 22.0 | 290   | 304 | 0    | ---  | R.GQVLAKPGTIKPHTK.F                |
| 1728.9325 | 1727.9253 | 1727.8366 | 51.3 | 305   | 319 | 1    | ---  | K.FESEVYILSKDEGGR.H                |
| 1797.0350 | 1796.0277 | 1795.9325 | 53.1 | 359   | 374 | 0    | ---  | K.MVVTLIHPAMDGLR.F + Oxidation (M) |
| 1803.9918 | 1802.9845 | 1802.8799 | 58.0 | 60    | 75  | 0    | ---  | R.GITINTSHVEYDTPTR.H               |
| 1965.1206 | 1964.1134 | 1963.9527 | 81.8 | 156   | 172 | 0    | 44   | R.ELLSQYDFPGDDTPIVR.G              |
| 2117.3190 | 2116.3117 | 2116.1568 | 73.2 | 206   | 224 | 0    | 28   | R.AIDKPFLLPIEDVFSISGR.G            |
- No match to: 723.3202, 725.3349, 790.4618, 804.3175, 832.3504, 848.3077, 855.0634, 861.0816, 877.0593, 879.0642, 893.0384, 897.0395, 930.4819, 941.5245, 965.5432, 985.5503, 1001.5439, 1046.5846, 1179.6348, 1193.6685, 1219.5995, 1255.6486, 1269.6710, 1271.6285, 1277.6571, 1296.7322, 1320.6617, 1326.7448, 1348.7190, 1368.7612, 1450.7841, 1472.8880, 1475.8216, 1477.7796, 1494.8828, 1497.7996, 1509.8403, 1511.9038, 1527.8609, 1550.8947, 1598.9195, 1617.8806, 1631.8934, 1654.9031, 1707.9342, 1712.9042, 1733.0067, 1749.9856, 1755.9948, 1818.0212, 1866.0850, 1898.0605, 1915.0945, 1931.0593, 1947.0781, 1949.0662, 1967.1856, 1981.0932, 1988.1120, 1994.1406, 2005.1346, 2010.0916, 2139.2472, 2211.2249, 2229.2467, 2233.2426, 2271.2633, 2384.1999, 2399.2428, 2439.4144, 2451.4028, 2498.4046, 2615.4719, 2705.3847, 2808.6002, 3284.5981
18. EFTU2\_SHISS Mass: 43457 Score: 138 Expect: 5.3e-09 Matches: 11  
Elongation factor Tu 2 OS=Shigella sonnei (strain Ss046) OX=300269 GN=tuf2 PE=3 SV=1
- | Observed  | Mr (expt) | Mr (calc) | ppm  | Start | End | Miss | Ions | Peptide                            |
|-----------|-----------|-----------|------|-------|-----|------|------|------------------------------------|
| 837.5072  | 836.4999  | 836.4868  | 15.7 | 118   | 124 | 0    | ---  | R.EHILLGR.Q                        |
| 1027.6166 | 1026.6093 | 1026.5822 | 26.4 | 271   | 280 | 0    | ---  | R.AGENVGVLLR.G                     |
| 1214.6581 | 1213.6508 | 1213.6230 | 22.9 | 305   | 314 | 0    | ---  | K.FESEVYILSK.D                     |
| 1233.6701 | 1232.6629 | 1232.6091 | 43.6 | 326   | 334 | 0    | 15   | K.GYRPFYFR.T                       |
| 1315.7305 | 1314.7232 | 1314.6060 | 89.1 | 254   | 264 | 1    | ---  | K.STCTGVEMFRK.L                    |
| 1574.9723 | 1573.9650 | 1573.9304 | 22.0 | 290   | 304 | 0    | ---  | R.GQVLAKPGTIKPHTK.F                |
| 1728.9325 | 1727.9253 | 1727.8366 | 51.3 | 305   | 319 | 1    | ---  | K.FESEVYILSKDEGGR.H                |
| 1797.0350 | 1796.0277 | 1795.9325 | 53.1 | 359   | 374 | 0    | ---  | K.MVVTLIHPAMDGLR.F + Oxidation (M) |
| 1803.9918 | 1802.9845 | 1802.8799 | 58.0 | 60    | 75  | 0    | ---  | R.GITINTSHVEYDTPTR.H               |
| 1965.1206 | 1964.1134 | 1963.9527 | 81.8 | 156   | 172 | 0    | 44   | R.ELLSQYDFPGDDTPIVR.G              |
| 2117.3190 | 2116.3117 | 2116.1568 | 73.2 | 206   | 224 | 0    | 28   | R.AIDKPFLLPIEDVFSISGR.G            |
- No match to: 723.3202, 725.3349, 790.4618, 804.3175, 832.3504, 848.3077, 855.0634, 861.0816, 877.0593, 879.0642, 893.0384, 897.0395, 930.4819, 941.5245, 965.5432, 985.5503, 1001.5439, 1046.5846, 1179.6348, 1193.6685, 1219.5995, 1255.6486, 1269.6710, 1271.6285, 1277.6571, 1296.7322, 1320.6617, 1326.7448, 1348.7190, 1368.7612, 1450.7841, 1472.8880, 1475.8216, 1477.7796, 1494.8828, 1497.7996, 1509.8403, 1511.9038, 1527.8609, 1550.8947, 1598.9195, 1617.8806, 1631.8934, 1654.9031, 1707.9342, 1712.9042, 1733.0067, 1749.9856, 1755.9948, 1818.0212, 1866.0850, 1898.0605, 1915.0945, 1931.0593, 1947.0781, 1949.0662, 1967.1856, 1981.0932, 1988.1120, 1994.1406, 2005.1346, 2010.0916, 2139.2472, 2211.2249, 2229.2467, 2233.2426, 2271.2633, 2384.1999, 2399.2428, 2439.4144, 2451.4028, 2498.4046, 2615.4719, 2705.3847, 2808.6002, 3284.5981
19. EFTU2\_EC057 Mass: 43457 Score: 138 Expect: 5.3e-09 Matches: 11  
Elongation factor Tu OS=Escherichia coli O157:H7 OX=83334 GN=tufA PE=3 SV=2
- | Observed  | Mr (expt) | Mr (calc) | ppm  | Start | End | Miss | Ions | Peptide        |
|-----------|-----------|-----------|------|-------|-----|------|------|----------------|
| 837.5072  | 836.4999  | 836.4868  | 15.7 | 118   | 124 | 0    | ---  | R.EHILLGR.Q    |
| 1027.6166 | 1026.6093 | 1026.5822 | 26.4 | 271   | 280 | 0    | ---  | R.AGENVGVLLR.G |

|           |           |           |      |     |   |     |   |     |                                      |
|-----------|-----------|-----------|------|-----|---|-----|---|-----|--------------------------------------|
| 1214.6581 | 1213.6508 | 1213.6230 | 22.9 | 305 | - | 314 | 0 | --- | K.FESEVYILSK.D                       |
| 1233.6701 | 1232.6629 | 1232.6091 | 43.6 | 326 | - | 334 | 0 | 15  | K.GYRPFYFR.T                         |
| 1315.7305 | 1314.7232 | 1314.6060 | 89.1 | 254 | - | 264 | 1 | --- | K.STCTGVEMFRK.L                      |
| 1574.9723 | 1573.9650 | 1573.9304 | 22.0 | 290 | - | 304 | 0 | --- | R.GQVLAKPGTIKPHTK.F                  |
| 1728.9325 | 1727.9253 | 1727.8366 | 51.3 | 305 | - | 319 | 1 | --- | K.FESEVYILSKDEGGR.H                  |
| 1797.0350 | 1796.0277 | 1795.9325 | 53.1 | 359 | - | 374 | 0 | --- | K.MVVTLIHPIAMDDGLR.F + Oxidation (M) |
| 1803.9918 | 1802.9845 | 1802.8799 | 58.0 | 60  | - | 75  | 0 | --- | R.GTTINTSHVEYDTPTR.H                 |
| 1965.1206 | 1964.1134 | 1963.9527 | 81.8 | 156 | - | 172 | 0 | 44  | R.ELLSQYDFPGDDTPIVR.G                |
| 2117.3190 | 2116.3117 | 2116.1568 | 73.2 | 206 | - | 224 | 0 | 28  | R.AIDKPFLLPIEDVFSISGR.G              |

**No match to:** 723.3202, 725.3349, 790.4618, 804.3175, 832.3504, 848.3077, 855.0634, 861.0816, 877.0593, 879.0642, 893.0384, 897.0395, 930.4819, 941.5245, 965.5432, 985.5503, 1001.5439, 1046.5846, 1179.6348, 1193.6685, 1219.5995, 1255.6486, 1269.6710, 1271.6285, 1277.6571, 1296.7322, 1320.6617, 1326.7448, 1348.7190, 1368.7612, 1450.7841, 1472.8880, 1475.8216, 1477.7796, 1494.8828, 1497.7996, 1509.8403, 1511.9038, 1527.8609, 1550.8947, 1598.9195, 1617.8806, 1631.8934, 1654.9031, 1707.9342, 1712.9042, 1733.0067, 1749.9856, 1755.9948, 1818.0212, 1866.0850, 1898.0605, 1915.0945, 1931.0593, 1947.0781, 1949.0662, 1967.1856, 1981.0932, 1988.1120, 1994.1406, 2005.1346, 2010.0916, 2139.2472, 2211.2249, 2229.2467, 2233.2426, 2271.2633, 2384.1999, 2399.2428, 2439.4144, 2451.4028, 2498.4046, 2615.4719, 2705.3847, 2808.6002, 3284.5981

20. [EFTU\\_ECOL6](#) Mass: 43457 Score: 138 Expect: 5.3e-09 Matches: 11  
 Elongation factor Tu OS=Escherichia coli O6:H1 (strain CFT073 / ATCC 700928 / UPEC) OX=199310 GN=tufA PE=3 SV=2

| Observed  | Mr (expt) | Mr (calc) | ppm  | Start | End | Miss | Ions | Peptide |                                      |
|-----------|-----------|-----------|------|-------|-----|------|------|---------|--------------------------------------|
| 837.5072  | 836.4999  | 836.4868  | 15.7 | 118   | -   | 124  | 0    | ---     | R.EHILLGR.Q                          |
| 1027.6166 | 1026.6093 | 1026.5822 | 26.4 | 271   | -   | 280  | 0    | ---     | R.AGENVGVLLR.G                       |
| 1214.6581 | 1213.6508 | 1213.6230 | 22.9 | 305   | -   | 314  | 0    | ---     | K.FESEVYILSK.D                       |
| 1233.6701 | 1232.6629 | 1232.6091 | 43.6 | 326   | -   | 334  | 0    | 15      | K.GYRPFYFR.T                         |
| 1315.7305 | 1314.7232 | 1314.6060 | 89.1 | 254   | -   | 264  | 1    | ---     | K.STCTGVEMFRK.L                      |
| 1574.9723 | 1573.9650 | 1573.9304 | 22.0 | 290   | -   | 304  | 0    | ---     | R.GQVLAKPGTIKPHTK.F                  |
| 1728.9325 | 1727.9253 | 1727.8366 | 51.3 | 305   | -   | 319  | 1    | ---     | K.FESEVYILSKDEGGR.H                  |
| 1797.0350 | 1796.0277 | 1795.9325 | 53.1 | 359   | -   | 374  | 0    | ---     | K.MVVTLIHPIAMDDGLR.F + Oxidation (M) |
| 1803.9918 | 1802.9845 | 1802.8799 | 58.0 | 60    | -   | 75   | 0    | ---     | R.GTTINTSHVEYDTPTR.H                 |
| 1965.1206 | 1964.1134 | 1963.9527 | 81.8 | 156   | -   | 172  | 0    | 44      | R.ELLSQYDFPGDDTPIVR.G                |
| 2117.3190 | 2116.3117 | 2116.1568 | 73.2 | 206   | -   | 224  | 0    | 28      | R.AIDKPFLLPIEDVFSISGR.G              |

**No match to:** 723.3202, 725.3349, 790.4618, 804.3175, 832.3504, 848.3077, 855.0634, 861.0816, 877.0593, 879.0642, 893.0384, 897.0395, 930.4819, 941.5245, 965.5432, 985.5503, 1001.5439, 1046.5846, 1179.6348, 1193.6685, 1219.5995, 1255.6486, 1269.6710, 1271.6285, 1277.6571, 1296.7322, 1320.6617, 1326.7448, 1348.7190, 1368.7612, 1450.7841, 1472.8880, 1475.8216, 1477.7796, 1494.8828, 1497.7996, 1509.8403, 1511.9038, 1527.8609, 1550.8947, 1598.9195, 1617.8806, 1631.8934, 1654.9031, 1707.9342, 1712.9042, 1733.0067, 1749.9856, 1755.9948, 1818.0212, 1866.0850, 1898.0605, 1915.0945, 1931.0593, 1947.0781, 1949.0662, 1967.1856, 1981.0932, 1988.1120, 1994.1406, 2005.1346, 2010.0916, 2139.2472, 2211.2249, 2229.2467, 2233.2426, 2271.2633, 2384.1999, 2399.2428, 2439.4144, 2451.4028, 2498.4046, 2615.4719, 2705.3847, 2808.6002, 3284.5981

## Search Parameters

Type of search : MS/MS Ion Search  
 Enzyme : Trypsin  
 Fixed modifications : [Carbamidomethyl \(C\)](#)  
 Variable modifications : [Oxidation \(M\)](#)  
 Mass values : Monoisotopic  
 Protein Mass : Unrestricted  
 Peptide Mass Tolerance : ± 150 ppm  
 Fragment Mass Tolerance : ± 2 Da  
 Max Missed Cleavages : 1  
 Instrument type : MALDI-TOF-TOF

Query1 (723.3202,+): <no title>  
 Query2 (725.3349,+): <no title>  
 Query3 (790.4618,+): <no title>  
 Query4 (804.3175,+): <no title>  
 Query5 (832.3504,+): <no title>  
 Query6 (837.5072,+): <no title>  
 Query7 (848.3077,+): <no title>  
 Query8 (855.0634,+): <no title>  
 Query9 (861.0816,+): <no title>  
 Query10 (877.0593,+): <no title>  
 Query11 (879.0642,+): <no title>  
 Query12 (893.0384,+): <no title>  
 Query13 (897.0395,+): <no title>  
 Query14 (930.4819,+): <no title>  
 Query15 (941.5245,+): <no title>  
 Query16 (965.5432,+): <no title>  
 Query17 (985.5503,+): <no title>  
 Query18 (1001.5439,+): <no title>  
 Query19 (1027.6166,+): <no title>  
 Query20 (1046.5846,+): <no title>  
 Query21 (1179.6348,+): <no title>  
 Query22 (1193.6685,+): <no title>  
 Query23 (1214.6581,+): <no title>  
 Query24 (1219.5995,+): <no title>  
 Query25 (1233.6701,+): <no title>  
 Query26 (1255.6486,+): <no title>  
 Query27 (1269.6710,+): <no title>  
 Query28 (1271.6285,+): <no title>  
 Query29 (1277.6571,+): <no title>  
 Query30 (1296.7322,+): <no title>  
 Query31 (1315.7305,+): <no title>  
 Query32 (1320.6617,+): <no title>  
 Query33 (1326.7448,+): <no title>  
 Query34 (1348.7190,+): <no title>  
 Query35 (1368.7612,+): <no title>  
 Query36 (1450.7841,+): <no title>  
 Query37 (1472.8880,+): <no title>  
 Query38 (1475.8216,+): <no title>  
 Query39 (1477.7796,+): <no title>  
 Query40 (1494.8828,+): <no title>  
 Query41 (1497.7996,+): <no title>  
 Query42 (1509.8403,+): <no title>  
 Query43 (1511.9038,+): <no title>  
 Query44 (1527.8609,+): <no title>  
 Query45 (1550.8947,+): <no title>  
 Query46 (1574.9723,+): <no title>  
 Query47 (1598.9195,+): <no title>  
 Query48 (1617.8806,+): <no title>

Query49 (1631.8934,1+) : <no title>  
Query50 (1654.9031,1+) : <no title>  
Query51 (1707.9342,1+) : <no title>  
Query52 (1712.9042,1+) : <no title>  
Query53 (1728.9325,1+) : <no title>  
Query54 (1733.0067,1+) : <no title>  
Query55 (1749.9856,1+) : <no title>  
Query56 (1755.9948,1+) : <no title>  
Query57 (1797.0350,1+) : <no title>  
Query58 (1803.9918,1+) : <no title>  
Query59 (1818.0212,1+) : <no title>  
Query60 (1866.0850,1+) : <no title>  
Query61 (1898.0605,1+) : <no title>  
Query62 (1915.0945,1+) : <no title>  
Query63 (1931.0593,1+) : <no title>  
Query64 (1947.0781,1+) : <no title>  
Query65 (1949.0662,1+) : <no title>  
Query66 (1965.1206,1+) : <no title>  
Query67 (1967.1856,1+) : <no title>  
Query68 (1981.0932,1+) : <no title>  
Query69 (1988.1120,1+) : <no title>  
Query70 (1994.1406,1+) : <no title>  
Query71 (2005.1346,1+) : <no title>  
Query72 (2010.0916,1+) : <no title>  
Query73 (2117.3190,1+) : <no title>  
Query74 (2139.2472,1+) : <no title>  
Query75 (2211.2249,1+) : <no title>  
Query76 (2229.2467,1+) : <no title>  
Query77 (2233.2426,1+) : <no title>  
Query78 (2271.2633,1+) : <no title>  
Query79 (2384.1999,1+) : <no title>  
Query80 (2399.2428,1+) : <no title>  
Query81 (2439.4144,1+) : <no title>  
Query82 (2451.4028,1+) : <no title>  
Query83 (2498.4046,1+) : <no title>  
Query84 (2615.4719,1+) : <no title>  
Query85 (2705.3847,1+) : <no title>  
Query86 (2808.6002,1+) : <no title>  
Query87 (3284.5981,1+) : <no title>

Mascot: <http://www.matrixscience.com/>



*MALDI MS MS Data Sheet For  
Blood Isolate*

Comment 1

Comment 2



| m/z     | S/N  | Quality Fac. | Res. | Intens. | Area |
|---------|------|--------------|------|---------|------|
| 70.067  | 6.5  | 315          | 354  | 271.28  | 59   |
| 72.109  | 3.7  | 166          | 282  | 154.67  | 43   |
| 86.118  | 12.0 | 3410         | 385  | 539.50  | 133  |
| 104.032 | 3.3  | 133          | 629  | 153.14  | 28   |
| 110.020 | 6.5  | 1427         | 597  | 303.61  | 63   |
| 112.061 | 10.5 | 1726         | 547  | 490.46  | 113  |
| 115.079 | 3.1  | 51           | 763  | 147.28  | 25   |
| 129.058 | 8.3  | 1795         | 701  | 392.29  | 82   |
| 136.008 | 5.3  | 587          | 754  | 259.11  | 53   |
| 153.994 | 14.1 | 3801         | 936  | 694.28  | 131  |
| 158.014 | 8.1  | 1113         | 940  | 404.06  | 78   |
| 169.011 | 3.0  | 74           | 770  | 156.49  | 40   |
| 170.998 | 5.2  | 61           | 827  | 270.92  | 65   |
| 175.017 | 55.8 | 31800        | 944  | 2960.91 | 642  |
| 183.957 | 7.2  | 123          | 939  | 395.64  | 91   |
| 191.965 | 3.5  | 31           | 1349 | 199.70  | 34   |
| 196.973 | 12.3 | 1438         | 1052 | 715.12  | 159  |
| 200.967 | 4.3  | 69           | 912  | 254.96  | 67   |
| 210.968 | 4.3  | 131          | 1058 | 264.94  | 63   |
| 213.003 | 5.2  | 177          | 962  | 327.58  | 87   |
| 214.965 | 7.6  | 673          | 1095 | 480.64  | 113  |
| 218.978 | 4.0  | 256          | 1178 | 255.81  | 57   |
| 226.943 | 19.0 | 6603         | 1194 | 1267.92 | 290  |
| 231.985 | 7.7  | 3446         | 1075 | 517.95  | 135  |
| 246.963 | 4.3  | 47           | 1236 | 317.11  | 77   |
| 256.977 | 5.9  | 391          | 933  | 445.94  | 151  |
| 273.970 | 5.0  | 99           | 1146 | 418.39  | 124  |
| 278.901 | 5.6  | 319          | 1204 | 474.85  | 137  |
| 283.990 | 7.4  | 1635         | 1028 | 645.45  | 222  |
| 285.916 | 4.1  | 54           | 1081 | 363.36  | 120  |
| 287.938 | 5.5  | 317          | 1044 | 492.20  | 169  |
| 297.936 | 5.1  | 87           | 1245 | 482.50  | 145  |
| 315.925 | 15.6 | 15405        | 1271 | 1584.39 | 499  |
| 327.968 | 4.2  | 55           | 1195 | 449.94  | 158  |
| 344.925 | 4.2  | 35           | 1326 | 477.57  | 160  |
| 349.892 | 18.3 | 16791        | 1293 | 2121.79 | 742  |
| 373.912 | 12.3 | 5576         | 1278 | 1539.24 | 590  |
| 398.949 | 3.9  | 184          | 1049 | 530.41  | 268  |

| m/z      | S/N  | Quality Fac. | Res. | Intens. | Area |
|----------|------|--------------|------|---------|------|
| 400.918  | 3.6  | 83           | 1114 | 488.35  | 234  |
| 403.932  | 6.0  | 287          | 1319 | 817.26  | 333  |
| 415.998  | 3.1  | 97           | 958  | 436.01  | 254  |
| 420.974  | 11.0 | 15256        | 1258 | 1544.85 | 695  |
| 428.909  | 3.4  | 83           | 1402 | 485.81  | 201  |
| 448.937  | 11.6 | 14331        | 1255 | 1691.94 | 826  |
| 562.021  | 5.7  | 467          | 1227 | 846.85  | 563  |
| 630.064  | 9.5  | 4485         | 1351 | 1368.90 | 970  |
| 647.094  | 8.3  | 2333         | 1402 | 1189.74 | 843  |
| 760.242  | 30.3 | 76102        | 1462 | 4140.41 | 3525 |
| 798.464  | 13.6 | 5889         | 1278 | 1845.77 | 1931 |
| 828.324  | 4.0  | 582          | 1439 | 533.65  | 523  |
| 879.678  | 3.6  | 33           | 1478 | 505.27  | 527  |
| 1010.485 | 5.3  | 189          | 1264 | 601.90  | 908  |
| 1029.275 | 4.4  | 197          | 1766 | 465.09  | 517  |
| 1031.448 | 5.1  | 98           | 1482 | 537.17  | 714  |
| 1041.542 | 16.1 | 5257         | 1476 | 1625.95 | 2204 |
| 1044.635 | 5.3  | 173          | 1208 | 528.01  | 879  |
| 1050.224 | 6.1  | 104          | 1239 | 583.09  | 955  |
| 1052.621 | 5.9  | 109          | 1170 | 554.77  | 965  |
| 1055.007 | 5.7  | 95           | 1172 | 545.89  | 952  |
| 1057.468 | 6.0  | 188          | 1175 | 575.27  | 1003 |
| 1068.607 | 5.4  | 88           | 1890 | 485.64  | 539  |
| 1075.644 | 75.9 | 4039         | 2819 | 6682.54 | 5023 |
| 1077.875 | 6.1  | 99           | 2124 | 534.53  | 534  |

Comment 1

Comment 2

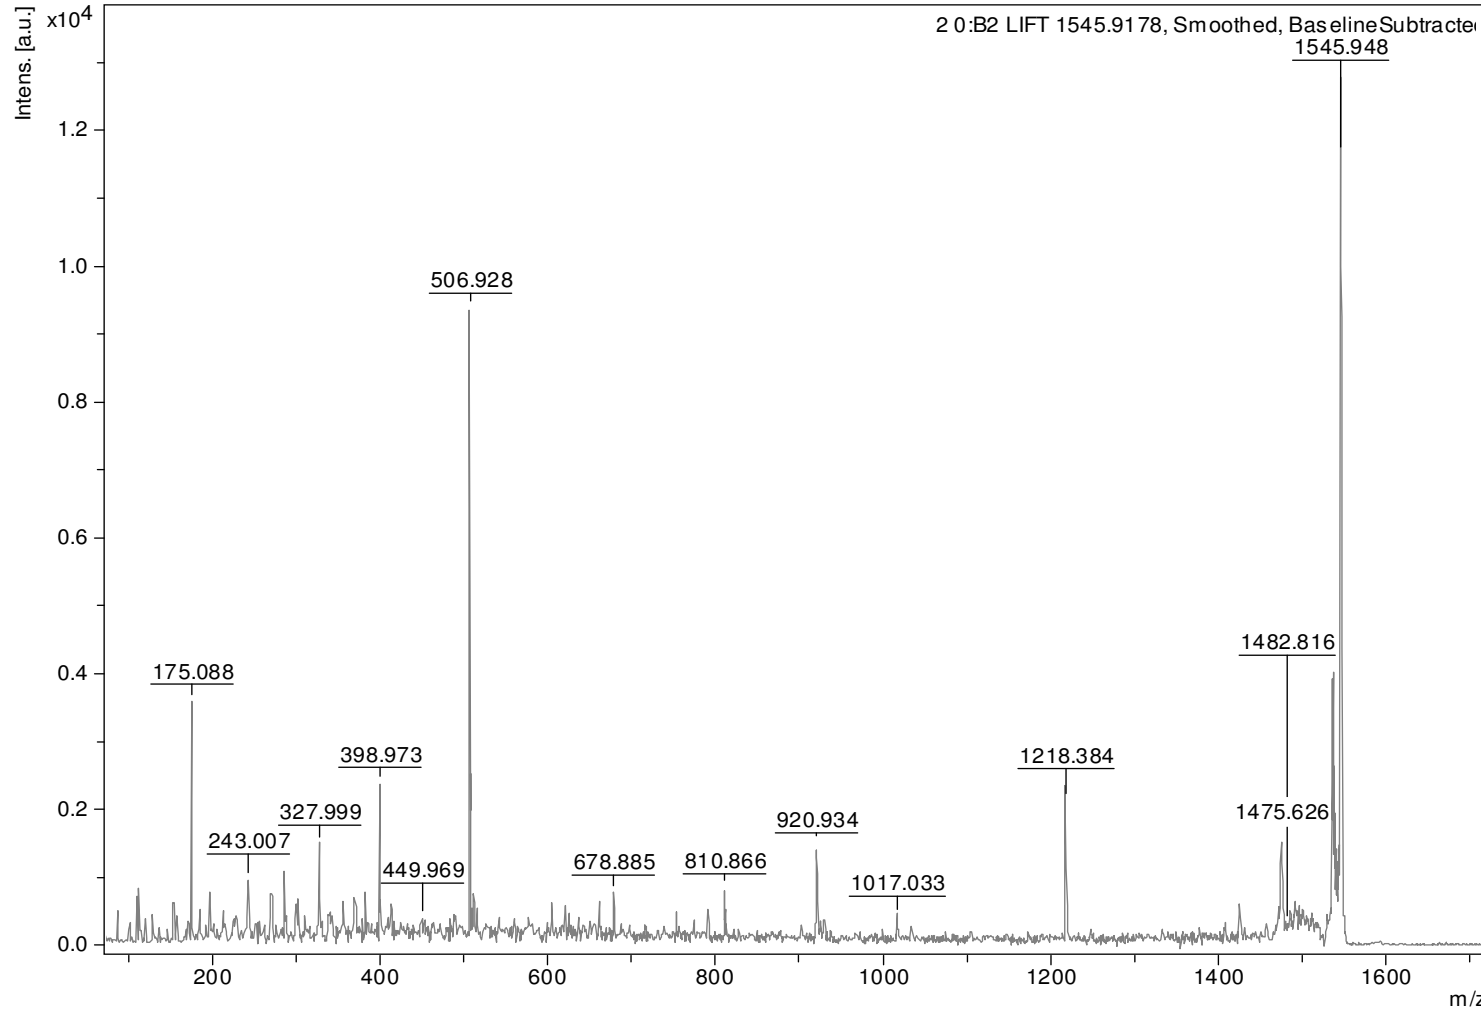

| m/z     | S/N  | Quality Fac. | Res. | Intens. | Area |
|---------|------|--------------|------|---------|------|
| 70.067  | 5.9  | 167          | 613  | 319.40  | 40   |
| 86.149  | 8.5  | 621          | 501  | 465.31  | 89   |
| 101.112 | 5.8  | 273          | 849  | 324.21  | 43   |
| 110.093 | 13.0 | 12421        | 972  | 725.72  | 92   |
| 112.104 | 14.3 | 1623         | 858  | 802.01  | 118  |
| 120.097 | 6.9  | 284          | 1029 | 382.17  | 50   |
| 129.106 | 8.1  | 639          | 1027 | 455.92  | 65   |
| 136.086 | 4.5  | 358          | 1084 | 250.78  | 36   |
| 147.081 | 4.2  | 292          | 1079 | 230.69  | 36   |
| 154.074 | 11.2 | 679          | 1040 | 626.85  | 106  |
| 158.083 | 7.6  | 1365         | 1091 | 422.57  | 70   |
| 169.065 | 4.2  | 95           | 1381 | 236.18  | 34   |
| 171.084 | 6.5  | 63           | 1345 | 362.39  | 54   |
| 175.088 | 64.3 | 28130        | 1324 | 3601.47 | 557  |
| 185.081 | 9.6  | 884          | 1196 | 531.95  | 97   |
| 192.054 | 5.3  | 124          | 1218 | 294.86  | 55   |
| 197.071 | 14.6 | 991          | 1344 | 817.70  | 142  |
| 201.057 | 5.4  | 48           | 1204 | 305.23  | 60   |
| 205.059 | 4.1  | 38           | 1230 | 235.58  | 47   |
| 213.069 | 9.2  | 353          | 1355 | 523.77  | 98   |
| 215.051 | 5.4  | 53           | 1239 | 308.59  | 64   |
| 226.038 | 7.4  | 62           | 1425 | 427.16  | 82   |
| 228.046 | 7.9  | 34           | 1469 | 457.40  | 86   |
| 230.020 | 5.6  | 169          | 1374 | 325.56  | 66   |
| 235.035 | 3.6  | 32           | 1437 | 207.40  | 41   |
| 243.007 | 16.9 | 757          | 1504 | 994.61  | 195  |
| 251.051 | 5.2  | 49           | 1312 | 311.77  | 73   |
| 256.034 | 6.2  | 74           | 1511 | 377.19  | 78   |
| 268.023 | 7.2  | 53           | 1410 | 448.63  | 105  |
| 270.023 | 12.3 | 1623         | 1455 | 768.81  | 176  |
| 272.022 | 11.5 | 617          | 1474 | 719.30  | 164  |
| 276.012 | 5.0  | 48           | 1559 | 320.88  | 70   |
| 285.993 | 16.8 | 651          | 1514 | 1128.50 | 266  |
| 299.996 | 9.1  | 100          | 1556 | 643.96  | 156  |
| 302.995 | 9.9  | 469          | 1559 | 700.60  | 171  |
| 310.978 | 6.4  | 40           | 1627 | 469.24  | 113  |
| 314.021 | 3.5  | 46           | 1332 | 259.99  | 78   |
| 315.992 | 3.8  | 57           | 1412 | 287.48  | 82   |

| m/z      | S/N  | Quality | Fac. | Res.    | Intens. | Area |
|----------|------|---------|------|---------|---------|------|
| 327.999  | 19.0 | 3652    | 1617 | 1519.11 | 393     |      |
| 330.971  | 4.5  | 57      | 1725 | 359.10  | 88      |      |
| 338.985  | 5.8  | 67      | 1463 | 485.48  | 144     |      |
| 341.016  | 6.2  | 95      | 1625 | 520.47  | 140     |      |
| 342.993  | 5.1  | 42      | 1641 | 439.11  | 118     |      |
| 355.964  | 7.6  | 101     | 1633 | 681.51  | 193     |      |
| 368.999  | 7.8  | 254     | 1636 | 739.76  | 218     |      |
| 370.994  | 6.6  | 122     | 1536 | 625.51  | 198     |      |
| 379.011  | 4.3  | 51      | 1438 | 422.99  | 146     |      |
| 382.004  | 8.2  | 393     | 1621 | 805.12  | 250     |      |
| 398.973  | 23.2 | 8300    | 1732 | 2413.01 | 738     |      |
| 449.969  | 3.6  | 51      | 1764 | 430.69  | 150     |      |
| 487.945  | 3.5  | 58      | 1737 | 474.68  | 186     |      |
| 489.912  | 3.1  | 67      | 1883 | 425.50  | 155     |      |
| 506.928  | 66.6 | 443857  | 2062 | 9417.07 | 3263    |      |
| 511.983  | 5.9  | 94      | 1872 | 836.98  | 323     |      |
| 515.957  | 4.1  | 70      | 2012 | 590.26  | 214     |      |
| 604.888  | 4.0  | 134     | 2084 | 638.77  | 278     |      |
| 621.861  | 3.8  | 84      | 2038 | 606.28  | 280     |      |
| 625.936  | 3.1  | 47      | 2003 | 508.79  | 241     |      |
| 661.869  | 4.0  | 107     | 2013 | 667.46  | 340     |      |
| 678.885  | 4.8  | 560     | 1995 | 798.68  | 425     |      |
| 791.929  | 3.5  | 234     | 1836 | 547.68  | 394     |      |
| 810.866  | 5.6  | 310     | 1802 | 877.76  | 666     |      |
| 920.934  | 10.9 | 681     | 1966 | 1539.28 | 1294    |      |
| 1017.033 | 3.4  | 157     | 1775 | 453.53  | 492     |      |
| 1218.384 | 15.8 | 5533    | 1976 | 2148.04 | 2832    |      |
| 1425.686 | 4.5  | 664     | 1894 | 591.76  | 1074    |      |
| 1475.626 | 15.7 | 97      | 2855 | 1721.10 | 2208    |      |
| 1482.816 | 3.3  | 55      | 1961 | 357.08  | 674     |      |
| 1486.532 | 4.0  | 47      | 1651 | 421.05  | 947     |      |
| 1491.087 | 6.6  | 130     | 1811 | 698.68  | 1441    |      |
| 1494.193 | 4.1  | 245     | 2299 | 434.63  | 708     |      |
| 1497.274 | 5.1  | 126     | 2415 | 525.35  | 818     |      |
| 1500.585 | 5.9  | 90      | 2417 | 611.75  | 954     |      |
| 1505.295 | 3.8  | 141     | 1671 | 376.75  | 857     |      |
| 1510.995 | 4.3  | 129     | 1680 | 426.87  | 973     |      |
| 1519.840 | 3.0  | 110     | 2067 | 297.46  | 557     |      |
| 1528.985 | 3.9  | 50      | 1809 | 363.71  | 787     |      |
| 1536.794 | 45.8 | 26574   | 2951 | 4215.63 | 5646    |      |
| 1539.087 | 12.9 | 454     | 3906 | 1179.65 | 1197    |      |

---

| m/z      | S/N   | Quality Fac. | Res. | Intens.  | Area  |
|----------|-------|--------------|------|----------|-------|
| 1543.640 | 12.0  | 110          | 3186 | 1091.06  | 1365  |
| 1545.948 | 129.7 | 55975        | 3356 | 11671.00 | 13889 |

Comment 1

Comment 2



2 0:B2 LIFT 1764.0908, Smoothed, BaselineSubtracted

| m/z     | S/N  | Quality | Fac. | Res.    | Intens. | Area |
|---------|------|---------|------|---------|---------|------|
| 69.915  | 7.0  | 1092    | 413  | 683.16  | 127     |      |
| 83.901  | 3.6  | 1395    | 684  | 350.30  | 48      |      |
| 85.930  | 5.4  | 590     | 545  | 528.28  | 92      |      |
| 100.885 | 3.4  | 152     | 679  | 329.83  | 55      |      |
| 111.875 | 29.7 | 10731   | 1003 | 2919.78 | 365     |      |
| 114.865 | 6.3  | 1415    | 1099 | 622.00  | 73      |      |
| 119.860 | 6.0  | 1647    | 933  | 589.23  | 85      |      |
| 128.867 | 12.6 | 3926    | 1125 | 1246.13 | 161     |      |
| 132.849 | 3.1  | 628     | 1216 | 307.18  | 38      |      |
| 135.824 | 7.8  | 2696    | 1114 | 769.87  | 106     |      |
| 140.813 | 3.1  | 72      | 887  | 310.47  | 56      |      |
| 146.822 | 3.3  | 260     | 1162 | 330.77  | 48      |      |
| 153.801 | 16.5 | 3036    | 1230 | 1675.38 | 240     |      |
| 157.788 | 11.7 | 2830    | 1324 | 1200.51 | 164     |      |
| 168.780 | 5.5  | 841     | 1144 | 577.94  | 99      |      |
| 170.797 | 8.0  | 189     | 1250 | 839.72  | 134     |      |
| 174.776 | 85.6 | 23237   | 1241 | 9022.79 | 1486    |      |
| 180.758 | 3.1  | 44      | 1297 | 333.12  | 54      |      |
| 185.745 | 9.0  | 1749    | 1159 | 980.33  | 185     |      |
| 191.754 | 3.7  | 69      | 1120 | 405.09  | 82      |      |
| 196.762 | 13.4 | 2807    | 1195 | 1508.71 | 294     |      |
| 198.754 | 9.5  | 991     | 1237 | 1077.69 | 205     |      |
| 201.720 | 3.7  | 145     | 1181 | 427.47  | 87      |      |
| 211.710 | 5.5  | 59      | 1230 | 671.73  | 138     |      |
| 216.737 | 3.1  | 54      | 1251 | 384.25  | 80      |      |
| 225.679 | 11.3 | 521     | 1195 | 1478.78 | 336     |      |
| 229.653 | 40.7 | 14995   | 1305 | 5414.73 | 1150    |      |
| 242.657 | 6.8  | 118     | 1141 | 960.04  | 248     |      |
| 261.627 | 3.5  | 70      | 1169 | 555.96  | 153     |      |
| 271.651 | 3.3  | 38      | 1164 | 567.74  | 164     |      |
| 282.583 | 4.5  | 88      | 1163 | 823.62  | 249     |      |
| 284.592 | 5.5  | 132     | 1321 | 1029.73 | 276     |      |
| 287.644 | 4.2  | 117     | 1077 | 807.28  | 269     |      |
| 297.599 | 5.3  | 189     | 1348 | 1058.09 | 293     |      |
| 304.561 | 6.1  | 705     | 1281 | 1267.75 | 379     |      |
| 321.535 | 5.6  | 466     | 1455 | 1271.77 | 357     |      |
| 328.534 | 30.3 | 10341   | 1375 | 7100.37 | 2166    |      |
| 353.503 | 5.0  | 94      | 1170 | 1306.25 | 511     |      |

| m/z      | S/N   | Quality | Fac. | Res.     | Intens. | Area |
|----------|-------|---------|------|----------|---------|------|
| 360.483  | 5.2   | 548     | 1401 | 1379.37  | 461     |      |
| 375.492  | 3.5   | 59      | 1377 | 991.13   | 354     |      |
| 392.466  | 5.7   | 481     | 1439 | 1706.70  | 616     |      |
| 410.458  | 4.3   | 37      | 1530 | 1346.58  | 483     |      |
| 417.438  | 3.4   | 61      | 1345 | 1074.88  | 448     |      |
| 427.459  | 17.5  | 11923   | 1500 | 5695.62  | 2190    |      |
| 463.428  | 5.2   | 470     | 1474 | 1818.29  | 787     |      |
| 526.419  | 5.7   | 612     | 1569 | 2099.23  | 1003    |      |
| 550.406  | 4.3   | 486     | 1632 | 1595.58  | 776     |      |
| 713.359  | 3.8   | 186     | 2042 | 1292.23  | 720     |      |
| 770.368  | 4.3   | 213     | 1977 | 1417.87  | 910     |      |
| 921.362  | 3.6   | 344     | 2078 | 1027.60  | 818     |      |
| 938.421  | 6.4   | 3509    | 2315 | 1812.04  | 1331    |      |
| 978.384  | 5.0   | 685     | 2056 | 1382.18  | 1219    |      |
| 995.451  | 5.4   | 2464    | 2092 | 1453.67  | 1294    |      |
| 1066.498 | 3.4   | 316     | 2048 | 853.84   | 866     |      |
| 1123.549 | 4.4   | 542     | 1685 | 1024.24  | 1382    |      |
| 1139.398 | 3.7   | 48      | 2780 | 855.65   | 716     |      |
| 1683.994 | 3.8   | 40      | 2218 | 684.99   | 1464    |      |
| 1687.720 | 5.8   | 215     | 2221 | 1032.58  | 2211    |      |
| 1690.911 | 3.7   | 120     | 1938 | 647.38   | 1595    |      |
| 1694.164 | 3.4   | 75      | 1880 | 592.83   | 1512    |      |
| 1698.333 | 4.4   | 86      | 2298 | 775.06   | 1624    |      |
| 1702.668 | 4.4   | 60      | 2300 | 761.09   | 1601    |      |
| 1704.734 | 6.6   | 372     | 1894 | 1127.98  | 2902    |      |
| 1707.440 | 5.4   | 120     | 1897 | 912.58   | 2345    |      |
| 1710.956 | 11.3  | 1881    | 1899 | 1899.44  | 4891    |      |
| 1713.458 | 4.4   | 88      | 1904 | 749.33   | 1935    |      |
| 1715.767 | 6.0   | 112     | 1906 | 1007.12  | 2602    |      |
| 1719.875 | 23.6  | 14604   | 1911 | 3915.19  | 10117   |      |
| 1726.462 | 3.7   | 195     | 1917 | 611.75   | 1590    |      |
| 1728.640 | 3.4   | 112     | 1921 | 551.73   | 1433    |      |
| 1746.077 | 3.3   | 80      | 1940 | 509.64   | 1339    |      |
| 1748.306 | 3.5   | 58      | 2769 | 555.87   | 1025    |      |
| 1750.529 | 8.6   | 245     | 3210 | 1351.89  | 2166    |      |
| 1753.901 | 11.7  | 1974    | 4162 | 1812.12  | 2238    |      |
| 1757.257 | 11.9  | 1510    | 4209 | 1835.70  | 2252    |      |
| 1759.503 | 9.2   | 74      | 3891 | 1408.83  | 1876    |      |
| 1761.873 | 13.3  | 46      | 3288 | 2034.04  | 3209    |      |
| 1764.091 | 163.1 | 28936   | 3073 | 24768.05 | 41892   |      |



Comment 1

Comment 2

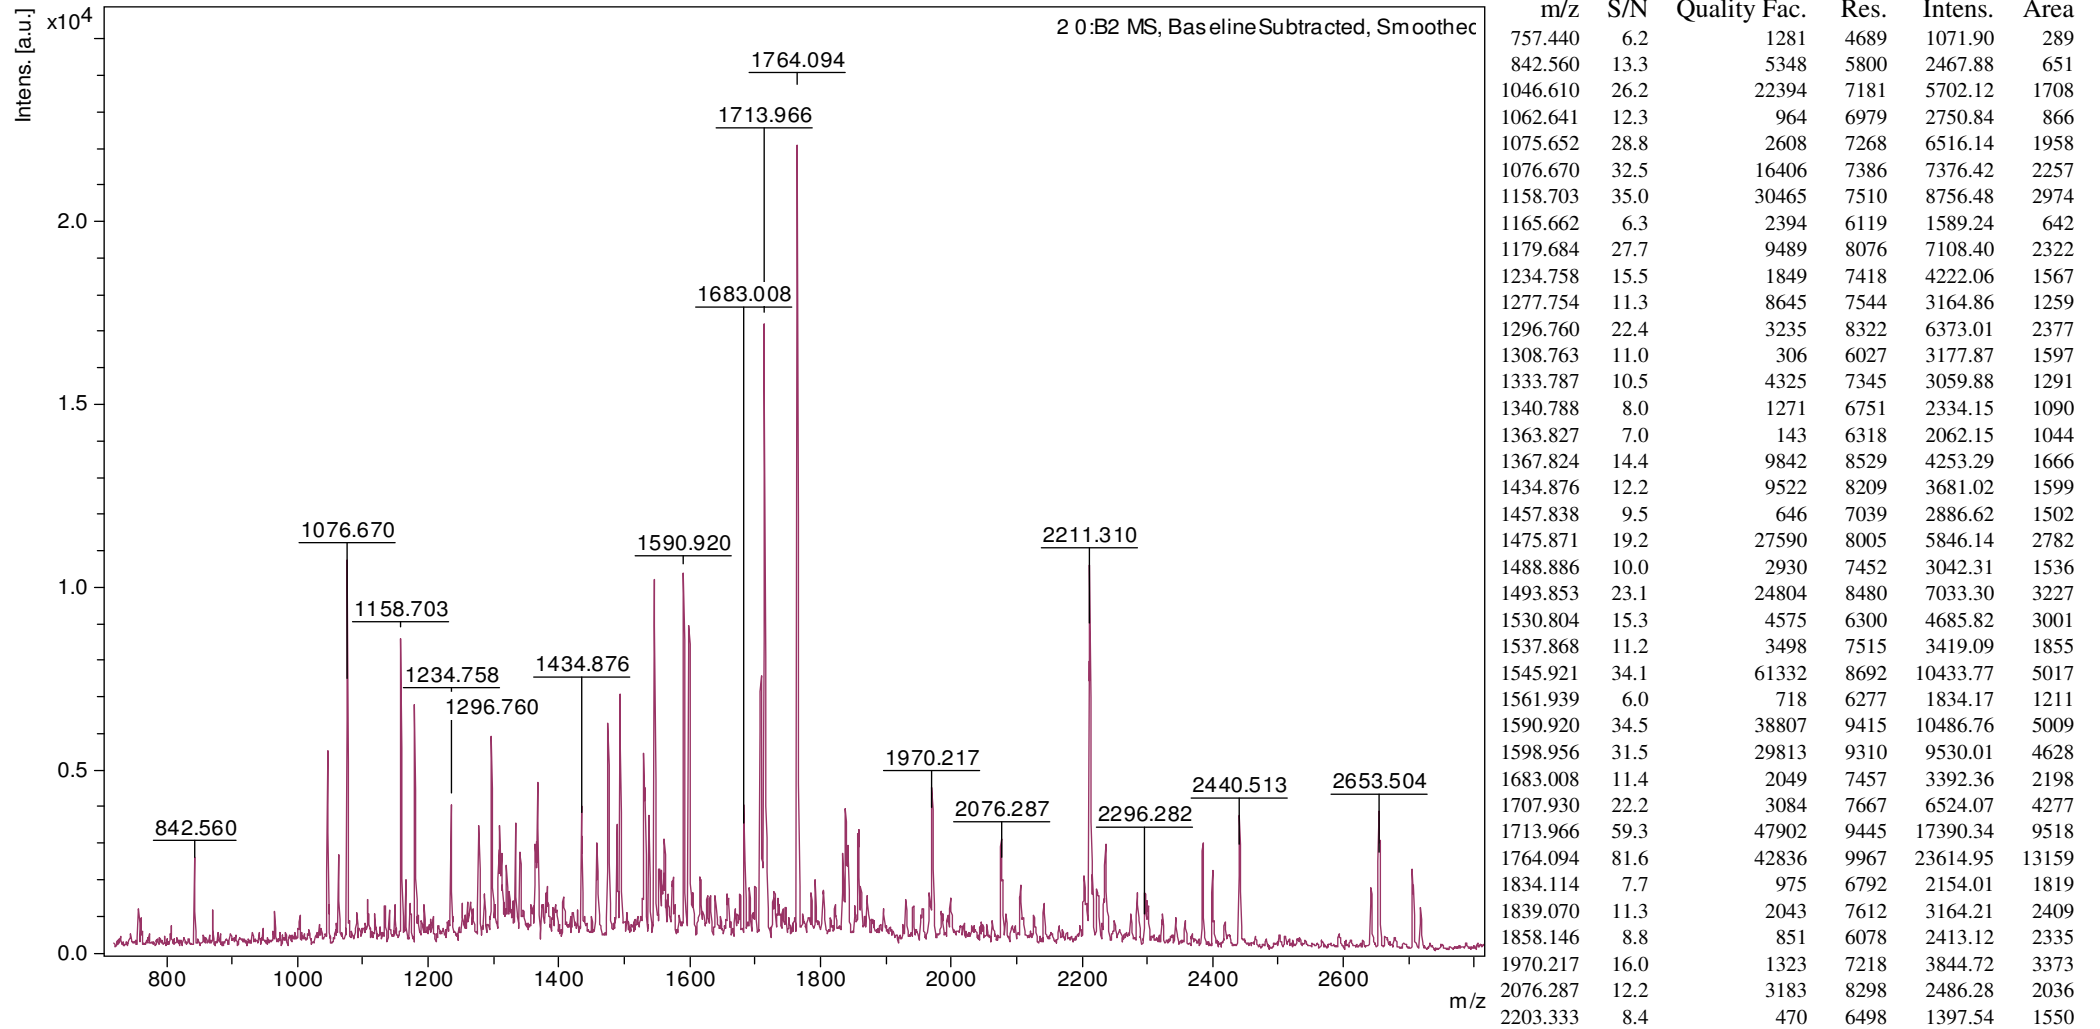

| m/z      | S/N  | Quality Fac. | Res.  | Intens. | Area |
|----------|------|--------------|-------|---------|------|
| 2211.310 | 54.0 | 30739        | 11032 | 8877.64 | 6117 |
| 2222.281 | 6.7  | 434          | 5200  | 1089.65 | 1533 |
| 2235.350 | 9.8  | 527          | 5350  | 1561.60 | 2136 |
| 2284.363 | 6.7  | 1047         | 6973  | 989.46  | 1075 |
| 2296.282 | 6.2  | 365          | 6296  | 904.80  | 1103 |
| 2384.175 | 15.9 | 2328         | 8113  | 2013.83 | 2011 |
| 2399.245 | 11.8 | 2928         | 8185  | 1453.17 | 1460 |
| 2440.513 | 24.6 | 19331        | 10473 | 2835.74 | 2307 |
| 2641.562 | 13.3 | 3177         | 8219  | 1100.17 | 1264 |
| 2653.504 | 32.5 | 35189        | 11398 | 2620.37 | 2224 |
| 2705.380 | 19.5 | 6338         | 9579  | 1424.56 | 1473 |
| 2717.322 | 9.7  | 3543         | 8203  | 700.19  | 854  |


**Mascot Search Results**

User : sanovar  
 Email : sanovar@sandor.co.in  
 Search title :  
 MS data file : DATA.TXT  
 Database : SwissProt 2018\_06 (557713 sequences; 200130199 residues)  
 Taxonomy : Bacteria (Eubacteria) (333552 sequences)  
 Timestamp : 11 Jul 2018 at 11:37:18 GMT  
 Warning : **A Peptide summary report will usually give a much clearer picture of MS/MS search results.**  
 Top Score : 191 for **DLDH\_ECO57**, Dihydrolipoyl dehydrogenase OS=Escherichia coli O157:H7 OX=83334 GN=lpdA PE=3 SV=2

### Mascot Score Histogram

Protein score is  $-10 \cdot \log(P)$ , where P is the probability that the observed match is a random event.  
 Protein scores greater than 68 are significant ( $p < 0.05$ ).  
 Protein scores are derived from ions scores as a non-probabilistic basis for ranking protein hits.

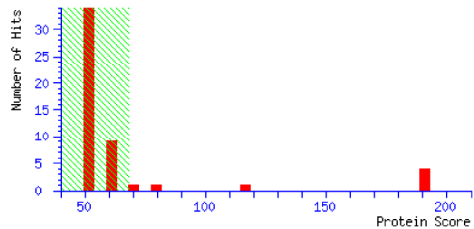

### Protein Summary Report

Format As  [Help](#)  
 Significance threshold  $p <$   Max. number of hits   
 Preferred taxonomy

### Index

| Accession                       | Mass   | Score | Description                                                                                                                           |
|---------------------------------|--------|-------|---------------------------------------------------------------------------------------------------------------------------------------|
| 1. <a href="#">DLDH_ECO57</a>   | 50942  | 191   | Dihydrolipoyl dehydrogenase OS=Escherichia coli O157:H7 OX=83334 GN=lpdA PE=3 SV=2                                                    |
| 2. <a href="#">DLDH_ECOL6</a>   | 50942  | 191   | Dihydrolipoyl dehydrogenase OS=Escherichia coli O6:H1 (strain CFT073 / ATCC 700928 / UPEC) OX=199310 GN=lpdA PE=3 SV=2                |
| 3. <a href="#">DLDH_ECOL1</a>   | 50942  | 191   | Dihydrolipoyl dehydrogenase OS=Escherichia coli (strain K12) OX=83333 GN=lpdA PE=1 SV=2                                               |
| 4. <a href="#">DLDH_SHIFL</a>   | 50942  | 191   | Dihydrolipoyl dehydrogenase OS=Shigella flexneri OX=623 GN=lpdA PE=3 SV=2                                                             |
| 5. <a href="#">DLDH_HAETN</a>   | 51521  | 119   | Dihydrolipoyl dehydrogenase OS=Haemophilus influenzae (strain ATCC 51907 / DSM 11121 / KW20 / Rd) OX=7:7                              |
| 6. <a href="#">AROA_BACLD</a>   | 45722  | 78    | 3-phosphoshikimate 1-carboxyvinyltransferase OS=Bacillus licheniformis (strain ATCC 14580 / DSM 13 / J) OX=1016998 GN=patA            |
| 7. <a href="#">GLMM_COXBN</a>   | 48301  | 69    | Phosphoglucosamine mutase OS=Coxiella burnetii (strain Dugway 5J108-111) OX=434922 GN=glmM PE=3 SV=1                                  |
| 8. <a href="#">GLMM_COXB1</a>   | 48347  | 63    | Phosphoglucosamine mutase OS=Coxiella burnetii (strain CbuK_Q154) OX=434924 GN=glmM PE=3 SV=1                                         |
| 9. <a href="#">GLMM_COXB2</a>   | 48347  | 63    | Phosphoglucosamine mutase OS=Coxiella burnetii (strain CbuG_Q212) OX=434923 GN=glmM PE=3 SV=1                                         |
| 10. <a href="#">TRAA_RHIRD</a>  | 123705 | 61    | Conjugal transfer protein TraA OS=Rhizobium radiobacter OX=358 GN=traA PE=3 SV=1                                                      |
| 11. <a href="#">RPOC2_SYNSC</a> | 148515 | 61    | DNA-directed RNA polymerase subunit beta' OS=Synecococcus sp. (strain CC9605) OX=110662 GN=rpoC2 PE=3 SV=1                            |
| 12. <a href="#">PAT_SALAR</a>   | 50192  | 61    | Putrescine aminotransferase OS=Salmonella arizonae (strain ATCC BAA-731 / CDC346-86 / RSK2980) OX=4151:1                              |
| 13. <a href="#">PAT_SALPB</a>   | 50078  | 61    | Putrescine aminotransferase OS=Salmonella paratyphi B (strain ATCC BAA-1250 / SPB7) OX=1016998 GN=patA                                |
| 14. <a href="#">RPOC2_PROMS</a> | 150243 | 59    | DNA-directed RNA polymerase subunit beta' OS=Prochlorococcus marinus (strain AS9601) OX=146891 GN=rpoC:1                              |
| 15. <a href="#">RPOC2_PROMO</a> | 150258 | 57    | DNA-directed RNA polymerase subunit beta' OS=Prochlorococcus marinus (strain MIT 9301) OX=167546 GN=rpoC:2                            |
| 16. <a href="#">RL9_PARKL</a>   | 16075  | 57    | 50S ribosomal protein L9 OS=Paraburkholderia xenovorans (strain LB400) OX=266265 GN=rplI PE=3 SV=1                                    |
| 17. <a href="#">RL10_THIDA</a>  | 18640  | 56    | 50S ribosomal protein L10 OS=Thiobacillus denitrificans (strain ATCC 25259) OX=292415 GN=rplJ PE=3 SV=1                               |
| 18. <a href="#">EPMA_SALAR</a>  | 37284  | 55    | Elongation factor P--(R)-beta-lysine ligase OS=Salmonella arizonae (strain ATCC BAA-731 / CDC346-86 / 1) OX=4151:1                    |
| 19. <a href="#">IF2_BACFN</a>   | 112675 | 55    | Translation initiation factor IF-2 OS=Bacteroides fragilis (strain ATCC 25285 / DSM 2151 / JCM 11019 / 1) OX=1016998 GN=ifb PE=3 SV=1 |
| 20. <a href="#">IF2_BACFR</a>   | 112675 | 55    | Translation initiation factor IF-2 OS=Bacteroides fragilis (strain YCH46) OX=295405 GN=infB PE=3 SV=1                                 |

### Results List

|                                                                                                                                                                                                                                                                                                                                                                                                                                                                                                                                                                                                                                                                                                                                                                                                                                                                                                                                                                                                                                                          |                            |             |            |                 |            |     |      |      |                                               |
|----------------------------------------------------------------------------------------------------------------------------------------------------------------------------------------------------------------------------------------------------------------------------------------------------------------------------------------------------------------------------------------------------------------------------------------------------------------------------------------------------------------------------------------------------------------------------------------------------------------------------------------------------------------------------------------------------------------------------------------------------------------------------------------------------------------------------------------------------------------------------------------------------------------------------------------------------------------------------------------------------------------------------------------------------------|----------------------------|-------------|------------|-----------------|------------|-----|------|------|-----------------------------------------------|
| 1.                                                                                                                                                                                                                                                                                                                                                                                                                                                                                                                                                                                                                                                                                                                                                                                                                                                                                                                                                                                                                                                       | <a href="#">DLDH_ECO57</a> | Mass: 50942 | Score: 191 | Expect: 2.6e-14 | Matches: 8 |     |      |      |                                               |
| Dihydrolipoyl dehydrogenase OS=Escherichia coli O157:H7 OX=83334 GN=lpdA PE=3 SV=2                                                                                                                                                                                                                                                                                                                                                                                                                                                                                                                                                                                                                                                                                                                                                                                                                                                                                                                                                                       |                            |             |            |                 |            |     |      |      |                                               |
|                                                                                                                                                                                                                                                                                                                                                                                                                                                                                                                                                                                                                                                                                                                                                                                                                                                                                                                                                                                                                                                          | Observed                   | Mr(expt)    | Mr(calc)   | ppm             | Start      | End | Miss | Ions | Peptide                                       |
|                                                                                                                                                                                                                                                                                                                                                                                                                                                                                                                                                                                                                                                                                                                                                                                                                                                                                                                                                                                                                                                          | 758.4449                   | 757.4377    | 757.4446   | -9.19           | 297        | -   | 302  | 1    | R.VDKQLR.T                                    |
|                                                                                                                                                                                                                                                                                                                                                                                                                                                                                                                                                                                                                                                                                                                                                                                                                                                                                                                                                                                                                                                          | 1076.6699                  | 1075.6627   | 1075.6026  | 55.8            | 264        | -   | 273  | 0    | R.YDAVLVAIGR.V                                |
|                                                                                                                                                                                                                                                                                                                                                                                                                                                                                                                                                                                                                                                                                                                                                                                                                                                                                                                                                                                                                                                          | 1333.7866                  | 1332.7793   | 1332.6786  | 75.5            | 285        | -   | 296  | 1    | K.AGVEVDDRGFIR.V                              |
|                                                                                                                                                                                                                                                                                                                                                                                                                                                                                                                                                                                                                                                                                                                                                                                                                                                                                                                                                                                                                                                          | 1367.8244                  | 1366.8172   | 1366.7245  | 67.8            | 68         | -   | 80   | 0    | K.ALAEHGIVFGEPK.T                             |
|                                                                                                                                                                                                                                                                                                                                                                                                                                                                                                                                                                                                                                                                                                                                                                                                                                                                                                                                                                                                                                                          | 1713.9658                  | 1712.9585   | 1712.8158  | 83.3            | 371        | -   | 386  | 0    | K.GISYETATFPWAASGR.A                          |
|                                                                                                                                                                                                                                                                                                                                                                                                                                                                                                                                                                                                                                                                                                                                                                                                                                                                                                                                                                                                                                                          | 1764.0939                  | 1763.0866   | 1762.9366  | 85.1            | 7          | -   | 24   | 0    | 103 K.TQVVVLGAGPAGYSAAFR.C                    |
|                                                                                                                                                                                                                                                                                                                                                                                                                                                                                                                                                                                                                                                                                                                                                                                                                                                                                                                                                                                                                                                          | 2274.3577                  | 2273.3504   | 2273.1991  | 66.6            | 303        | -   | 323  | 0    | --- R.TNVPHIFAIGDIVGQPMLAHK.G + Oxidation (M) |
|                                                                                                                                                                                                                                                                                                                                                                                                                                                                                                                                                                                                                                                                                                                                                                                                                                                                                                                                                                                                                                                          | 2322.3983                  | 2321.3910   | 2321.2379  | 66.0            | 2          | -   | 24   | 1    | --- M.STEIKTQVVVLGAGPAGYSAAFR.C               |
| No match to: 761.4539, 773.4587, 807.4419, 842.5599, 870.5871, 931.5710, 965.5635, 1003.6035, 1046.6100, 1062.6412, 1064.6582, 1075.6517, 1118.6055, 1133.6818, 1140.6556, 1149.6929, 1158.7030, 1165.6616, 1172.7483, 1179.6837, 1234.7577, 1259.7439, 1277.7544, 1285.7582, 1296.7598, 1308.7634, 1320.6892, 1340.7881, 1373.7740, 1390.7958, 1434.8763, 1457.8382, 1475.8714, 1488.8863, 1493.8532, 1530.8044, 1537.8684, 1545.9206, 1553.9584, 1561.9388, 1590.9204, 1598.9555, 1615.9930, 1638.9781, 1657.9450, 1683.0081, 1690.9261, 1699.9587, 1707.9303, 1729.9719, 1786.0298, 1791.8986, 1804.0504, 1822.0336, 1834.1144, 1839.0705, 1842.1348, 1858.1460, 1862.0788, 1930.0964, 1941.1169, 1955.1238, 1970.2165, 1972.1537, 1985.1441, 1998.1688, 2076.2873, 2083.1868, 2105.2985, 2126.2672, 2141.2573, 2164.2353, 2203.3329, 2211.3104, 2215.3655, 2222.2808, 2235.3499, 2284.3628, 2296.2822, 2343.2148, 2357.2678, 2384.1747, 2399.2446, 2418.3632, 2440.5128, 2592.4853, 2641.5621, 2653.5041, 2705.3800, 2717.3219, 2888.5748, 3264.6235 |                            |             |            |                 |            |     |      |      |                                               |
| 2.                                                                                                                                                                                                                                                                                                                                                                                                                                                                                                                                                                                                                                                                                                                                                                                                                                                                                                                                                                                                                                                       | <a href="#">DLDH_ECOL6</a> | Mass: 50942 | Score: 191 | Expect: 2.6e-14 | Matches: 8 |     |      |      |                                               |
| Dihydrolipoyl dehydrogenase OS=Escherichia coli O6:H1 (strain CFT073 / ATCC 700928 / UPEC) OX=199310 GN=lpdA PE=3 SV=2                                                                                                                                                                                                                                                                                                                                                                                                                                                                                                                                                                                                                                                                                                                                                                                                                                                                                                                                   |                            |             |            |                 |            |     |      |      |                                               |
|                                                                                                                                                                                                                                                                                                                                                                                                                                                                                                                                                                                                                                                                                                                                                                                                                                                                                                                                                                                                                                                          | Observed                   | Mr(expt)    | Mr(calc)   | ppm             | Start      | End | Miss | Ions | Peptide                                       |
|                                                                                                                                                                                                                                                                                                                                                                                                                                                                                                                                                                                                                                                                                                                                                                                                                                                                                                                                                                                                                                                          | 758.4449                   | 757.4377    | 757.4446   | -9.19           | 297        | -   | 302  | 1    | R.VDKQLR.T                                    |
|                                                                                                                                                                                                                                                                                                                                                                                                                                                                                                                                                                                                                                                                                                                                                                                                                                                                                                                                                                                                                                                          | 1076.6699                  | 1075.6627   | 1075.6026  | 55.8            | 264        | -   | 273  | 0    | R.YDAVLVAIGR.V                                |

|           |           |           |      |     |   |     |   |     |                                           |
|-----------|-----------|-----------|------|-----|---|-----|---|-----|-------------------------------------------|
| 1333.7866 | 1332.7793 | 1332.6786 | 75.5 | 285 | - | 296 | 1 | --- | K.AGVEVDDRRGFIR.V                         |
| 1367.8244 | 1366.8172 | 1366.7245 | 67.8 | 68  | - | 80  | 0 | --- | K.ALAEHGIVFGEPEK.T                        |
| 1713.9658 | 1712.9585 | 1712.8158 | 83.3 | 371 | - | 386 | 0 | 59  | K.GISYETATFPWAASGR.A                      |
| 1764.0939 | 1763.0866 | 1762.9366 | 85.1 | 7   | - | 24  | 0 | 103 | K.TQVVVLGAGPAGYSAAFR.C                    |
| 2274.3577 | 2273.3504 | 2273.1991 | 66.6 | 303 | - | 323 | 0 | --- | R.TNVPHIFAIGDIVGQPMLAHK.G + Oxidation (M) |
| 2322.3983 | 2321.3910 | 2321.2379 | 66.0 | 2   | - | 24  | 1 | --- | M.STEIKTQVVVLGAGPAGYSAAFR.C               |

**No match to:** 761.4539, 773.4587, 807.4419, 842.5599, 870.5871, 931.5710, 965.5635, 1003.6035, 1046.6100, 1062.6412, 1064.6582, 1075.6517, 1118.6055, 1133.6818, 1140.6556, 1149.6929, 1158.7030, 1165.6616, 1172.7483, 1179.6837, 1234.7577, 1259.7439, 1277.7544, 1285.7582, 1296.7598, 1308.7634, 1320.6892, 1340.7881, 1373.7740, 1390.7958, 1434.8763, 1457.8382, 1475.8714, 1488.8863, 1493.8532, 1530.8044, 1537.8684, 1545.9206, 1553.9584, 1561.9388, 1590.9204, 1598.9555, 1615.9930, 1638.9781, 1657.9450, 1683.0081, 1690.9261, 1699.9587, 1707.9303, 1729.9719, 1786.0298, 1791.8986, 1804.0504, 1822.0336, 1834.1144, 1839.0705, 1842.1348, 1858.1460, 1862.0788, 1930.0964, 1941.1169, 1955.1238, 1970.2165, 1972.1537, 1985.1441, 1998.1688, 2076.2873, 2083.1868, 2105.2985, 2126.2672, 2141.2573, 2164.2353, 2203.3329, 2211.3104, 2215.3655, 2222.2808, 2235.3499, 2284.3628, 2296.2822, 2343.2148, 2357.2678, 2384.1747, 2399.2446, 2418.3632, 2440.5128, 2592.4853, 2641.5621, 2653.5041, 2705.3800, 2717.3219, 2888.5748, 3264.6235

3. [DLDH ECOLI](#) Mass: 50942 Score: 191 Expect: 2.6e-14 Matches: 8

Dihydrolipoyl dehydrogenase OS=Escherichia coli (strain K12) OX=83333 GN=lpdA PE=1 SV=2

| Observed  | Mr (expt) | Mr (calc) | ppm   | Start | End | Miss | Ions | Peptide |                                           |
|-----------|-----------|-----------|-------|-------|-----|------|------|---------|-------------------------------------------|
| 758.4449  | 757.4377  | 757.4446  | -9.19 | 297   | -   | 302  | 1    | ---     | R.VDKQLR.T                                |
| 1076.6699 | 1075.6627 | 1075.6026 | 55.8  | 264   | -   | 273  | 0    | ---     | R.YDAVLVAIGR.V                            |
| 1333.7866 | 1332.7793 | 1332.6786 | 75.5  | 285   | -   | 296  | 1    | ---     | K.AGVEVDDRRGFIR.V                         |
| 1367.8244 | 1366.8172 | 1366.7245 | 67.8  | 68    | -   | 80   | 0    | ---     | K.ALAEHGIVFGEPEK.T                        |
| 1713.9658 | 1712.9585 | 1712.8158 | 83.3  | 371   | -   | 386  | 0    | 59      | K.GISYETATFPWAASGR.A                      |
| 1764.0939 | 1763.0866 | 1762.9366 | 85.1  | 7     | -   | 24   | 0    | 103     | K.TQVVVLGAGPAGYSAAFR.C                    |
| 2274.3577 | 2273.3504 | 2273.1991 | 66.6  | 303   | -   | 323  | 0    | ---     | R.TNVPHIFAIGDIVGQPMLAHK.G + Oxidation (M) |
| 2322.3983 | 2321.3910 | 2321.2379 | 66.0  | 2     | -   | 24   | 1    | ---     | M.STEIKTQVVVLGAGPAGYSAAFR.C               |

**No match to:** 761.4539, 773.4587, 807.4419, 842.5599, 870.5871, 931.5710, 965.5635, 1003.6035, 1046.6100, 1062.6412, 1064.6582, 1075.6517, 1118.6055, 1133.6818, 1140.6556, 1149.6929, 1158.7030, 1165.6616, 1172.7483, 1179.6837, 1234.7577, 1259.7439, 1277.7544, 1285.7582, 1296.7598, 1308.7634, 1320.6892, 1340.7881, 1373.7740, 1390.7958, 1434.8763, 1457.8382, 1475.8714, 1488.8863, 1493.8532, 1530.8044, 1537.8684, 1545.9206, 1553.9584, 1561.9388, 1590.9204, 1598.9555, 1615.9930, 1638.9781, 1657.9450, 1683.0081, 1690.9261, 1699.9587, 1707.9303, 1729.9719, 1786.0298, 1791.8986, 1804.0504, 1822.0336, 1834.1144, 1839.0705, 1842.1348, 1858.1460, 1862.0788, 1930.0964, 1941.1169, 1955.1238, 1970.2165, 1972.1537, 1985.1441, 1998.1688, 2076.2873, 2083.1868, 2105.2985, 2126.2672, 2141.2573, 2164.2353, 2203.3329, 2211.3104, 2215.3655, 2222.2808, 2235.3499, 2284.3628, 2296.2822, 2343.2148, 2357.2678, 2384.1747, 2399.2446, 2418.3632, 2440.5128, 2592.4853, 2641.5621, 2653.5041, 2705.3800, 2717.3219, 2888.5748, 3264.6235

4. [DLDH SHIFL](#) Mass: 50942 Score: 191 Expect: 2.6e-14 Matches: 8

Dihydrolipoyl dehydrogenase OS=Shigella flexneri OX=623 GN=lpdA PE=3 SV=2

| Observed  | Mr (expt) | Mr (calc) | ppm   | Start | End | Miss | Ions | Peptide |                                           |
|-----------|-----------|-----------|-------|-------|-----|------|------|---------|-------------------------------------------|
| 758.4449  | 757.4377  | 757.4446  | -9.19 | 297   | -   | 302  | 1    | ---     | R.VDKQLR.T                                |
| 1076.6699 | 1075.6627 | 1075.6026 | 55.8  | 264   | -   | 273  | 0    | ---     | R.YDAVLVAIGR.V                            |
| 1333.7866 | 1332.7793 | 1332.6786 | 75.5  | 285   | -   | 296  | 1    | ---     | K.AGVEVDDRRGFIR.V                         |
| 1367.8244 | 1366.8172 | 1366.7245 | 67.8  | 68    | -   | 80   | 0    | ---     | K.ALAEHGIVFGEPEK.T                        |
| 1713.9658 | 1712.9585 | 1712.8158 | 83.3  | 371   | -   | 386  | 0    | 59      | K.GISYETATFPWAASGR.A                      |
| 1764.0939 | 1763.0866 | 1762.9366 | 85.1  | 7     | -   | 24   | 0    | 103     | K.TQVVVLGAGPAGYSAAFR.C                    |
| 2274.3577 | 2273.3504 | 2273.1991 | 66.6  | 303   | -   | 323  | 0    | ---     | R.TNVPHIFAIGDIVGQPMLAHK.G + Oxidation (M) |
| 2322.3983 | 2321.3910 | 2321.2379 | 66.0  | 2     | -   | 24   | 1    | ---     | M.STEIKTQVVVLGAGPAGYSAAFR.C               |

**No match to:** 761.4539, 773.4587, 807.4419, 842.5599, 870.5871, 931.5710, 965.5635, 1003.6035, 1046.6100, 1062.6412, 1064.6582, 1075.6517, 1118.6055, 1133.6818, 1140.6556, 1149.6929, 1158.7030, 1165.6616, 1172.7483, 1179.6837, 1234.7577, 1259.7439, 1277.7544, 1285.7582, 1296.7598, 1308.7634, 1320.6892, 1340.7881, 1373.7740, 1390.7958, 1434.8763, 1457.8382, 1475.8714, 1488.8863, 1493.8532, 1530.8044, 1537.8684, 1545.9206, 1553.9584, 1561.9388, 1590.9204, 1598.9555, 1615.9930, 1638.9781, 1657.9450, 1683.0081, 1690.9261, 1699.9587, 1707.9303, 1729.9719, 1786.0298, 1791.8986, 1804.0504, 1822.0336, 1834.1144, 1839.0705, 1842.1348, 1858.1460, 1862.0788, 1930.0964, 1941.1169, 1955.1238, 1970.2165, 1972.1537, 1985.1441, 1998.1688, 2076.2873, 2083.1868, 2105.2985, 2126.2672, 2141.2573, 2164.2353, 2203.3329, 2211.3104, 2215.3655, 2222.2808, 2235.3499, 2284.3628, 2296.2822, 2343.2148, 2357.2678, 2384.1747, 2399.2446, 2418.3632, 2440.5128, 2592.4853, 2641.5621, 2653.5041, 2705.3800, 2717.3219, 2888.5748, 3264.6235

5. [DLDH HAERIN](#) Mass: 51521 Score: 119 Expect: 4.2e-07 Matches: 5

Dihydrolipoyl dehydrogenase OS=Haemophilus influenzae (strain ATCC 51907 / DSM 11121 / KW20 / Rd) OX=71421 GN=lpdA PE=3 SV=2

| Observed  | Mr (expt) | Mr (calc) | ppm   | Start | End | Miss | Ions | Peptide |                                              |
|-----------|-----------|-----------|-------|-------|-----|------|------|---------|----------------------------------------------|
| 1076.6699 | 1075.6627 | 1075.6026 | 55.8  | 264   | -   | 273  | 0    | ---     | R.YDAVLVAIGR.V                               |
| 1457.8382 | 1456.8309 | 1456.7522 | 54.1  | 279   | -   | 292  | 1    | ---     | K.LIDAGKAGVEVDDR.G                           |
| 1764.0939 | 1763.0866 | 1762.9366 | 85.1  | 7     | -   | 24   | 0    | 103     | K.TQVVVLGAGPAGYSAAFR.C                       |
| 2274.3577 | 2273.3504 | 2273.1991 | 66.6  | 303   | -   | 323  | 0    | ---     | R.TNVPHIFAIGDIVGQPMLAHK.G                    |
| 2705.3800 | 2704.3728 | 2704.3941 | -7.90 | 300   | -   | 323  | 1    | ---     | K.QMRPNVPHIFAIGDIVGQPMLAHK.G + Oxidation (M) |

**No match to:** 758.4449, 761.4539, 773.4587, 807.4419, 842.5599, 870.5871, 931.5710, 965.5635, 1003.6035, 1046.6100, 1062.6412, 1064.6582, 1075.6517, 1118.6055, 1133.6818, 1140.6556, 1149.6929, 1158.7030, 1165.6616, 1172.7483, 1179.6837, 1234.7577, 1259.7439, 1277.7544, 1285.7582, 1296.7598, 1308.7634, 1320.6892, 1340.7881, 1373.7740, 1390.7958, 1434.8763, 1457.8382, 1475.8714, 1488.8863, 1493.8532, 1530.8044, 1537.8684, 1545.9206, 1553.9584, 1561.9388, 1590.9204, 1598.9555, 1615.9930, 1638.9781, 1657.9450, 1683.0081, 1690.9261, 1699.9587, 1707.9303, 1729.9719, 1786.0298, 1791.8986, 1804.0504, 1822.0336, 1834.1144, 1839.0705, 1842.1348, 1858.1460, 1862.0788, 1930.0964, 1941.1169, 1955.1238, 1970.2165, 1972.1537, 1985.1441, 1998.1688, 2076.2873, 2083.1868, 2105.2985, 2126.2672, 2141.2573, 2164.2353, 2203.3329, 2211.3104, 2215.3655, 2222.2808, 2235.3499, 2284.3628, 2296.2822, 2343.2148, 2357.2678, 2384.1747, 2399.2446, 2418.3632, 2440.5128, 2592.4853, 2641.5621, 2653.5041, 2717.3219, 2888.5748, 3264.6235

6. [AROA BACLCD](#) Mass: 45722 Score: 78 Expect: 0.0058 Matches: 14

3-phosphoshikimate 1-carboxyvinyltransferase OS=Bacillus licheniformis (strain ATCC 14580 / DSM 13 / JCM 2505 / NBRC 12200 / NCI

| Observed  | Mr (expt) | Mr (calc) | ppm    | Start | End | Miss | Ions | Peptide |                                            |
|-----------|-----------|-----------|--------|-------|-----|------|------|---------|--------------------------------------------|
| 842.5599  | 841.5527  | 841.5021  | 60.0   | 124   | -   | 130  | 1    | ---     | R.VTEPLRK.M                                |
| 870.5871  | 869.5798  | 869.5083  | 82.2   | 123   | -   | 129  | 1    | ---     | K.RVTEPLR.K                                |
| 965.5635  | 964.5563  | 964.4978  | 60.6   | 11    | -   | 19   | 0    | ---     | K.GELHIPGDK.S                              |
| 1140.6556 | 1139.6483 | 1139.5831 | 57.2   | 197   | -   | 206  | 0    | ---     | R.LMSFMFVSLR.E                             |
| 1149.6929 | 1148.6856 | 1148.5826 | 89.7   | 139   | -   | 149  | 0    | ---     | R.AGGEYTPLSVR.G                            |
| 1179.6837 | 1178.6765 | 1178.6772 | -0.58  | 367   | -   | 378  | 1    | ---     | K.IHGKTPPLTGAK.V                           |
| 1475.8714 | 1474.8641 | 1474.7627 | 68.8   | 340   | -   | 352  | 1    | ---     | K.ETNRIDTVAELK.K                           |
| 1493.8532 | 1492.8459 | 1492.8249 | 14.1   | 6     | -   | 19   | 1    | ---     | K.ISSLKELHIPGDK.S                          |
| 1545.9206 | 1544.9134 | 1544.8059 | 69.5   | 11    | -   | 24   | 1    | 7       | K.GELHIPGDKSISHR.S                         |
| 1590.9204 | 1589.9131 | 1589.8162 | 61.0   | 135   | -   | 149  | 1    | ---     | K.IDRAGGEYTPLSVR.G                         |
| 1657.9450 | 1656.9377 | 1656.9046 | 20.0   | 294   | -   | 309  | 1    | ---     | K.TSSLKAAEISGLDIPR.L                       |
| 1707.9303 | 1706.9230 | 1706.8232 | 58.5   | 20    | -   | 35   | 1    | ---     | K.SISHRVFMFGAAEGK.T                        |
| 2322.3983 | 2321.3910 | 2321.3457 | 19.5   | 310   | -   | 331  | 0    | ---     | R.LIDEIPIIALLATQAEGTIVK.D                  |
| 2399.2446 | 2398.2373 | 2398.2679 | -12.74 | 96    | -   | 118  | 0    | ---     | R.LMLGILAGRPFHSTVAGDESIK.R + Oxidation (M) |

**No match to:** 758.4449, 761.4539, 773.4587, 807.4419, 931.5710, 1003.6035, 1046.6100, 1062.6412, 1064.6582, 1075.6517, 1076.6699, 1118.6055, 1133.6818, 1158.7030, 1165.6616, 1172.7483, 1234.7577, 1259.7439, 1277.7544, 1285.7582, 1296.7598,

1308.7634, 1320.6892, 1333.7866, 1340.7881, 1367.8244, 1373.7740, 1390.7958, 1434.8763, 1457.8382, 1488.8863, 1530.8044,  
 1537.8684, 1553.9584, 1561.9388, 1598.9555, 1615.9930, 1638.9781, 1683.0081, 1690.9261, 1699.9587, 1713.9658, 1729.9719,  
 1764.0939, 1786.0298, 1791.8986, 1804.0504, 1822.0336, 1834.1144, 1839.0705, 1842.1348, 1858.1460, 1862.0788, 1930.0964,  
 1941.1169, 1955.1238, 1970.2165, 1972.1537, 1985.1441, 1998.1688, 2076.2873, 2083.1868, 2105.2985, 2126.2672, 2141.2573,  
 2164.2353, 2203.3329, 2211.3104, 2215.3655, 2222.2808, 2235.3499, 2274.3577, 2284.3628, 2296.2822, 2343.2148, 2357.2678,  
 2384.1747, 2418.3632, 2440.5128, 2592.4853, 2641.5621, 2653.5041, 2705.3800, 2717.3219, 2888.5748, 3264.6235

7. [GLMM COXBN](#) Mass: 48301 Score: 69 Expect: 0.046 Matches: 9  
 Phosphoglucosamine mutase OS=Coxiella burnetii (strain Dugway 5J108-111) OX=434922 GN=glmM PE=3 SV=1

| Observed                                                                                                                                                                                                                                                                                                                                                                                                                                                                                                                                                                                                                                                                                                                                                                                                                                                                                                                                                                                                                                              | Mr (expt) | Mr (calc) | ppm    | Start | End | Miss | Ions | Peptide                                 |
|-------------------------------------------------------------------------------------------------------------------------------------------------------------------------------------------------------------------------------------------------------------------------------------------------------------------------------------------------------------------------------------------------------------------------------------------------------------------------------------------------------------------------------------------------------------------------------------------------------------------------------------------------------------------------------------------------------------------------------------------------------------------------------------------------------------------------------------------------------------------------------------------------------------------------------------------------------------------------------------------------------------------------------------------------------|-----------|-----------|--------|-------|-----|------|------|-----------------------------------------|
| 758.4449                                                                                                                                                                                                                                                                                                                                                                                                                                                                                                                                                                                                                                                                                                                                                                                                                                                                                                                                                                                                                                              | 757.4377  | 757.4235  | 18.7   | 28    | -   | 34   | 0    | --- K.LGWAVGR.V                         |
| 761.4539                                                                                                                                                                                                                                                                                                                                                                                                                                                                                                                                                                                                                                                                                                                                                                                                                                                                                                                                                                                                                                              | 760.4466  | 760.3967  | 65.7   | 393   | -   | 399  | 0    | --- K.AITEAEK.Q                         |
| 1234.7577                                                                                                                                                                                                                                                                                                                                                                                                                                                                                                                                                                                                                                                                                                                                                                                                                                                                                                                                                                                                                                             | 1233.7504 | 1233.7445 | 4.81   | 369   | -   | 379  | 0    | --- K.NPQVLINVPIK.G                     |
| 1259.7439                                                                                                                                                                                                                                                                                                                                                                                                                                                                                                                                                                                                                                                                                                                                                                                                                                                                                                                                                                                                                                             | 1258.7367 | 1258.6656 | 56.5   | 120   | -   | 130  | 0    | --- K.LSDELELAIEK.Q                     |
| 1457.8382                                                                                                                                                                                                                                                                                                                                                                                                                                                                                                                                                                                                                                                                                                                                                                                                                                                                                                                                                                                                                                             | 1456.8309 | 1456.7634 | 46.4   | 393   | -   | 406  | 1    | --- K.AITEAEKQLNGAGR.I                  |
| 1561.9388                                                                                                                                                                                                                                                                                                                                                                                                                                                                                                                                                                                                                                                                                                                                                                                                                                                                                                                                                                                                                                             | 1560.9315 | 1560.7817 | 96.0   | 432   | -   | 446  | 0    | 31 R.QTAEMLAAAVQOSTL.-                  |
| 1707.9303                                                                                                                                                                                                                                                                                                                                                                                                                                                                                                                                                                                                                                                                                                                                                                                                                                                                                                                                                                                                                                             | 1706.9230 | 1707.0117 | -51.96 | 365   | -   | 379  | 1    | --- K.VMVKNPQVLINVPIK.G + Oxidation (M) |
| 2284.3628                                                                                                                                                                                                                                                                                                                                                                                                                                                                                                                                                                                                                                                                                                                                                                                                                                                                                                                                                                                                                                             | 2283.3555 | 2283.2144 | 61.8   | 274   | -   | 295  | 0    | --- K.ENAPLGVVGTIMSNLGLQTLK.R           |
| 2440.5128                                                                                                                                                                                                                                                                                                                                                                                                                                                                                                                                                                                                                                                                                                                                                                                                                                                                                                                                                                                                                                             | 2439.5056 | 2439.3155 | 77.9   | 274   | -   | 296  | 1    | --- K.ENAPLGVVGTIMSNLGLQTLKR.H          |
| <b>No match to:</b> 773.4587, 807.4419, 842.5599, 870.5871, 931.5710, 965.5635, 1003.6035, 1046.6100, 1062.6412, 1064.6582, 1075.6517, 1076.6699, 1118.6055, 1133.6818, 1140.6556, 1149.6929, 1158.7030, 1165.6616, 1172.7483, 1179.6837, 1277.7544, 1285.7582, 1296.7598, 1308.7634, 1320.6892, 1333.7866, 1340.7881, 1367.8244, 1373.7740, 1390.7958, 1434.8763, 1475.8714, 1488.8863, 1493.8532, 1530.8044, 1537.8684, 1545.9206, 1553.9584, 1590.9204, 1598.9555, 1615.9930, 1638.9781, 1657.9450, 1683.0081, 1690.9261, 1699.9587, 1713.9658, 1729.9719, 1764.0939, 1786.0298, 1791.8986, 1804.0504, 1822.0336, 1834.1144, 1839.0705, 1842.1348, 1858.1460, 1862.0788, 1930.0964, 1941.1169, 1955.1238, 1970.2165, 1972.1537, 1985.1441, 1998.1688, 2076.2873, 2083.1868, 2105.2985, 2126.2672, 2141.2573, 2164.2353, 2203.3329, 2211.3104, 2215.3655, 2222.2808, 2235.3499, 2274.3577, 2296.2822, 2322.3983, 2343.2148, 2357.2678, 2384.1747, 2399.2446, 2418.3632, 2592.4853, 2641.5621, 2653.5041, 2705.3800, 2717.3219, 2888.5748, 3264.6235 |           |           |        |       |     |      |      |                                         |

8. [GLMM COXB1](#) Mass: 48347 Score: 63 Expect: 0.18 Matches: 8  
 Phosphoglucosamine mutase OS=Coxiella burnetii (strain CbuK\_Q154) OX=434924 GN=glmM PE=3 SV=1

| Observed                                                                                                                                                                                                                                                                                                                                                                                                                                                                                                                                                                                                                                                                                                                                                                                                                                                                                                                                                                                                                                                         | Mr (expt) | Mr (calc) | ppm  | Start | End | Miss | Ions | Peptide                                     |
|------------------------------------------------------------------------------------------------------------------------------------------------------------------------------------------------------------------------------------------------------------------------------------------------------------------------------------------------------------------------------------------------------------------------------------------------------------------------------------------------------------------------------------------------------------------------------------------------------------------------------------------------------------------------------------------------------------------------------------------------------------------------------------------------------------------------------------------------------------------------------------------------------------------------------------------------------------------------------------------------------------------------------------------------------------------|-----------|-----------|------|-------|-----|------|------|---------------------------------------------|
| 758.4449                                                                                                                                                                                                                                                                                                                                                                                                                                                                                                                                                                                                                                                                                                                                                                                                                                                                                                                                                                                                                                                         | 757.4377  | 757.4235  | 18.7 | 28    | -   | 34   | 0    | --- K.LGWAVGR.V                             |
| 761.4539                                                                                                                                                                                                                                                                                                                                                                                                                                                                                                                                                                                                                                                                                                                                                                                                                                                                                                                                                                                                                                                         | 760.4466  | 760.3967  | 65.7 | 393   | -   | 399  | 0    | --- K.AITEAEK.Q                             |
| 1259.7439                                                                                                                                                                                                                                                                                                                                                                                                                                                                                                                                                                                                                                                                                                                                                                                                                                                                                                                                                                                                                                                        | 1258.7367 | 1258.6656 | 56.5 | 120   | -   | 130  | 0    | --- K.LSDELELAIEK.Q                         |
| 1457.8382                                                                                                                                                                                                                                                                                                                                                                                                                                                                                                                                                                                                                                                                                                                                                                                                                                                                                                                                                                                                                                                        | 1456.8309 | 1456.7634 | 46.4 | 393   | -   | 406  | 1    | --- K.AITEAEKQLNGAGR.I                      |
| 1561.9388                                                                                                                                                                                                                                                                                                                                                                                                                                                                                                                                                                                                                                                                                                                                                                                                                                                                                                                                                                                                                                                        | 1560.9315 | 1560.7817 | 96.0 | 432   | -   | 446  | 0    | 31 R.QTAEMLAAAVQOSTL.-                      |
| 1941.1169                                                                                                                                                                                                                                                                                                                                                                                                                                                                                                                                                                                                                                                                                                                                                                                                                                                                                                                                                                                                                                                        | 1940.1096 | 1940.0190 | 46.7 | 74    | -   | 91   | 0    | --- K.LTGPMPPTPAIAYLTHSVR.A + Oxidation (M) |
| 2284.3628                                                                                                                                                                                                                                                                                                                                                                                                                                                                                                                                                                                                                                                                                                                                                                                                                                                                                                                                                                                                                                                        | 2283.3555 | 2283.2144 | 61.8 | 274   | -   | 295  | 0    | --- K.ENAPLGVVGTIMSNLGLQTLK.R               |
| 2440.5128                                                                                                                                                                                                                                                                                                                                                                                                                                                                                                                                                                                                                                                                                                                                                                                                                                                                                                                                                                                                                                                        | 2439.5056 | 2439.3155 | 77.9 | 274   | -   | 296  | 1    | --- K.ENAPLGVVGTIMSNLGLQTLKR.H              |
| <b>No match to:</b> 773.4587, 807.4419, 842.5599, 870.5871, 931.5710, 965.5635, 1003.6035, 1046.6100, 1062.6412, 1064.6582, 1075.6517, 1076.6699, 1118.6055, 1133.6818, 1140.6556, 1149.6929, 1158.7030, 1165.6616, 1172.7483, 1179.6837, 1234.7577, 1277.7544, 1285.7582, 1296.7598, 1308.7634, 1320.6892, 1333.7866, 1340.7881, 1367.8244, 1373.7740, 1390.7958, 1434.8763, 1475.8714, 1488.8863, 1493.8532, 1530.8044, 1537.8684, 1545.9206, 1553.9584, 1590.9204, 1598.9555, 1615.9930, 1638.9781, 1657.9450, 1683.0081, 1690.9261, 1699.9587, 1707.9303, 1713.9658, 1729.9719, 1764.0939, 1786.0298, 1791.8986, 1804.0504, 1822.0336, 1834.1144, 1839.0705, 1842.1348, 1858.1460, 1862.0788, 1930.0964, 1955.1238, 1970.2165, 1972.1537, 1985.1441, 1998.1688, 2076.2873, 2083.1868, 2105.2985, 2126.2672, 2141.2573, 2164.2353, 2203.3329, 2211.3104, 2215.3655, 2222.2808, 2235.3499, 2274.3577, 2296.2822, 2322.3983, 2343.2148, 2357.2678, 2384.1747, 2399.2446, 2418.3632, 2592.4853, 2641.5621, 2653.5041, 2705.3800, 2717.3219, 2888.5748, 3264.6235 |           |           |      |       |     |      |      |                                             |

9. [GLMM COXB2](#) Mass: 48347 Score: 63 Expect: 0.18 Matches: 8  
 Phosphoglucosamine mutase OS=Coxiella burnetii (strain CbuQ\_212) OX=434923 GN=glmM PE=3 SV=1

| Observed                                                                                                                                                                                                                                                                                                                                                                                                                                                                                                                                                                                                                                                                                                                                                                                                                                                                                                                                                                                                                                                         | Mr (expt) | Mr (calc) | ppm  | Start | End | Miss | Ions | Peptide                                     |
|------------------------------------------------------------------------------------------------------------------------------------------------------------------------------------------------------------------------------------------------------------------------------------------------------------------------------------------------------------------------------------------------------------------------------------------------------------------------------------------------------------------------------------------------------------------------------------------------------------------------------------------------------------------------------------------------------------------------------------------------------------------------------------------------------------------------------------------------------------------------------------------------------------------------------------------------------------------------------------------------------------------------------------------------------------------|-----------|-----------|------|-------|-----|------|------|---------------------------------------------|
| 758.4449                                                                                                                                                                                                                                                                                                                                                                                                                                                                                                                                                                                                                                                                                                                                                                                                                                                                                                                                                                                                                                                         | 757.4377  | 757.4235  | 18.7 | 28    | -   | 34   | 0    | --- K.LGWAVGR.V                             |
| 761.4539                                                                                                                                                                                                                                                                                                                                                                                                                                                                                                                                                                                                                                                                                                                                                                                                                                                                                                                                                                                                                                                         | 760.4466  | 760.3967  | 65.7 | 393   | -   | 399  | 0    | --- K.AITEAEK.Q                             |
| 1259.7439                                                                                                                                                                                                                                                                                                                                                                                                                                                                                                                                                                                                                                                                                                                                                                                                                                                                                                                                                                                                                                                        | 1258.7367 | 1258.6656 | 56.5 | 120   | -   | 130  | 0    | --- K.LSDELELAIEK.Q                         |
| 1457.8382                                                                                                                                                                                                                                                                                                                                                                                                                                                                                                                                                                                                                                                                                                                                                                                                                                                                                                                                                                                                                                                        | 1456.8309 | 1456.7634 | 46.4 | 393   | -   | 406  | 1    | --- K.AITEAEKQLNGAGR.I                      |
| 1561.9388                                                                                                                                                                                                                                                                                                                                                                                                                                                                                                                                                                                                                                                                                                                                                                                                                                                                                                                                                                                                                                                        | 1560.9315 | 1560.7817 | 96.0 | 432   | -   | 446  | 0    | 31 R.QTAEMLAAAVQOSTL.-                      |
| 1941.1169                                                                                                                                                                                                                                                                                                                                                                                                                                                                                                                                                                                                                                                                                                                                                                                                                                                                                                                                                                                                                                                        | 1940.1096 | 1940.0190 | 46.7 | 74    | -   | 91   | 0    | --- K.LTGPMPPTPAIAYLTHSVR.A + Oxidation (M) |
| 2284.3628                                                                                                                                                                                                                                                                                                                                                                                                                                                                                                                                                                                                                                                                                                                                                                                                                                                                                                                                                                                                                                                        | 2283.3555 | 2283.2144 | 61.8 | 274   | -   | 295  | 0    | --- K.ENAPLGVVGTIMSNLGLQTLK.R               |
| 2440.5128                                                                                                                                                                                                                                                                                                                                                                                                                                                                                                                                                                                                                                                                                                                                                                                                                                                                                                                                                                                                                                                        | 2439.5056 | 2439.3155 | 77.9 | 274   | -   | 296  | 1    | --- K.ENAPLGVVGTIMSNLGLQTLKR.H              |
| <b>No match to:</b> 773.4587, 807.4419, 842.5599, 870.5871, 931.5710, 965.5635, 1003.6035, 1046.6100, 1062.6412, 1064.6582, 1075.6517, 1076.6699, 1118.6055, 1133.6818, 1140.6556, 1149.6929, 1158.7030, 1165.6616, 1172.7483, 1179.6837, 1234.7577, 1277.7544, 1285.7582, 1296.7598, 1308.7634, 1320.6892, 1333.7866, 1340.7881, 1367.8244, 1373.7740, 1390.7958, 1434.8763, 1475.8714, 1488.8863, 1493.8532, 1530.8044, 1537.8684, 1545.9206, 1553.9584, 1590.9204, 1598.9555, 1615.9930, 1638.9781, 1657.9450, 1683.0081, 1690.9261, 1699.9587, 1707.9303, 1713.9658, 1729.9719, 1764.0939, 1786.0298, 1791.8986, 1804.0504, 1822.0336, 1834.1144, 1839.0705, 1842.1348, 1858.1460, 1862.0788, 1930.0964, 1955.1238, 1970.2165, 1972.1537, 1985.1441, 1998.1688, 2076.2873, 2083.1868, 2105.2985, 2126.2672, 2141.2573, 2164.2353, 2203.3329, 2211.3104, 2215.3655, 2222.2808, 2235.3499, 2274.3577, 2296.2822, 2322.3983, 2343.2148, 2357.2678, 2384.1747, 2399.2446, 2418.3632, 2592.4853, 2641.5621, 2653.5041, 2705.3800, 2717.3219, 2888.5748, 3264.6235 |           |           |      |       |     |      |      |                                             |

10. [TRAA RHIRD](#) Mass: 123705 Score: 61 Expect: 0.25 Matches: 20  
 Conjugal transfer protein TraA OS=Rhizobium radiobacter OX=358 GN=traA PE=3 SV=1

| Observed  | Mr (expt) | Mr (calc) | ppm    | Start | End | Miss | Ions | Peptide                                 |
|-----------|-----------|-----------|--------|-------|-----|------|------|-----------------------------------------|
| 773.4587  | 772.4514  | 772.4443  | 9.23   | 611   | -   | 616  | 1    | --- R.EKLVER.G                          |
| 807.4419  | 806.4346  | 806.3956  | 48.3   | 348   | -   | 354  | 0    | --- R.LEATMAR.Q + Oxidation (M)         |
| 931.5710  | 930.5638  | 930.4771  | 93.2   | 462   | -   | 469  | 1    | --- R.GRDLLDDK.T                        |
| 965.5635  | 964.5563  | 964.5342  | 22.9   | 18    | -   | 26   | 0    | --- R.SVLSAAYR.H                        |
| 1118.6055 | 1117.5982 | 1117.5339 | 57.6   | 617   | -   | 626  | 0    | --- R.GMVGEGHLFR.T + Oxidation (M)      |
| 1165.6616 | 1164.6543 | 1164.5775 | 66.0   | 286   | -   | 295  | 1    | --- K.SVFDERDVAK.V                      |
| 1234.7577 | 1233.7504 | 1233.6354 | 93.3   | 366   | -   | 377  | 0    | --- R.GVSPALDALTFR.R                    |
| 1367.8244 | 1366.8172 | 1366.7569 | 44.1   | 161   | -   | 173  | 1    | --- K.KVAVIGEDGQPV.R.T                  |
| 1373.7740 | 1372.7668 | 1372.7059 | 44.4   | 960   | -   | 970  | 1    | --- R.LQTDQSLRQ.R.V                     |
| 1390.7958 | 1389.7885 | 1389.7365 | 37.5   | 366   | -   | 378  | 1    | --- R.GVSPALDALTFR.H                    |
| 1488.8863 | 1487.8790 | 1487.7732 | 71.1   | 996   | -   | 1009 | 0    | --- R.NDLPAAIAYALSNR.E                  |
| 1537.8684 | 1536.8611 | 1536.7719 | 58.1   | 484   | -   | 498  | 1    | --- K.QMAGFVDTAVRAGAK.I + Oxidation (M) |
| 1615.9930 | 1614.9858 | 1614.8590 | 78.5   | 2     | -   | 17   | 1    | --- M.AIAHFASIVSRGSGR.S                 |
| 1764.0939 | 1763.0866 | 1762.9254 | 91.5   | 46    | -   | 61   | 0    | 14 K.QGLLHEEFVLPADAPK.W                 |
| 1791.8986 | 1790.8913 | 1790.9275 | -20.19 | 382   | -   | 398  | 1    | --- R.LSDEQKAAIHHVAGPAR.I               |
| 1804.0504 | 1803.0431 | 1802.9122 | 72.6   | 954   | -   | 968  | 1    | --- R.ETVTQRQLQTDQSLR.Q                 |
| 1822.0336 | 1821.0263 | 1821.0723 | -25.28 | 270   | -   | 285  | 1    | --- R.ILNPNFAIVLIDLITREK.S              |
| 1842.1348 | 1841.1275 | 1841.0271 | 54.5   | 202   | -   | 218  | 1    | --- R.LNHHLLAGGIDKIDGR.S                |
| 2126.2672 | 2125.2599 | 2125.1068 | 72.0   | 416   | -   | 436  | 1    | --- K.AAREAWELAGYHVVGALACK.A            |
| 2284.3628 | 2283.3555 | 2283.1535 | 88.5   | 176   | -   | 195  | 1    | --- K.SGKILYELWAGSTDDFNVLR.D            |

**No match to:** 758.4449, 761.4539, 842.5599, 870.5871, 1003.6035, 1046.6100, 1062.6412, 1064.6582, 1075.6517, 1076.6699, 1133.6818, 1140.6556, 1149.6929, 1158.7030, 1172.7483, 1179.6837, 1259.7439, 1277.7544, 1285.7582, 1296.7598, 1308.7634, 1320.6892, 1333.7866, 1340.7881, 1434.8763, 1457.8382, 1475.8714, 1493.8532, 1530.8044, 1545.9206, 1553.9584, 1561.9388, 1590.9204, 1598.9555, 1638.9781, 1657.9450, 1683.0081, 1690.9261, 1699.9587, 1707.9303, 1713.9658, 1729.9719, 1786.0298, 1834.1144, 1839.0705, 1858.1460, 1862.0788, 1930.0964, 1941.1169, 1955.1238, 1970.2165, 1972.1537, 1985.1441, 1998.1688, 2076.2873, 2083.1868, 2105.2985, 2141.2573, 2164.2353, 2203.3329, 2211.3104, 2215.3655, 2222.2808, 2235.3499, 2274.3577, 2296.2822, 2322.3983, 2343.2148, 2357.2678, 2384.1747, 2399.2446, 2418.3632, 2440.5128, 2592.4853, 2641.5621, 2653.5041, 2705.3800, 2717.3219, 2888.5748, 3264.6235

**11. RPOC2\_SYNSC** Mass: 148515 Score: 61 Expect: 0.25 Matches: 18

DNA-directed RNA polymerase subunit beta' OS=Synechococcus sp. (strain CC9605) OX=110662 GN=rpoC2 PE=3 SV=1

| Observed  | Mr (expt) | Mr (calc) | ppm    | Start | End | Miss | Ions | Peptide                                          |
|-----------|-----------|-----------|--------|-------|-----|------|------|--------------------------------------------------|
| 773.4587  | 772.4514  | 772.4443  | 9.21   | 488   | -   | 494  | 0    | R.QGNITLK.A                                      |
| 807.4419  | 806.4346  | 806.3705  | 79.5   | 166   | -   | 172  | 0    | R.GNMSQVR.Q + Oxidation (M)                      |
| 1165.6616 | 1164.6543 | 1164.5887 | 56.3   | 538   | -   | 547  | 1    | R.SEYGGVRLR.D                                    |
| 1259.7439 | 1258.7367 | 1258.6816 | 43.8   | 1024  | -   | 1033 | 1    | R.RPRESTILCK.K                                   |
| 1320.6892 | 1319.6820 | 1319.7197 | -28.63 | 298   | -   | 310  | 1    | K.SFEAAGVKAVSR.S                                 |
| 1333.7866 | 1332.7793 | 1332.7323 | 35.3   | 555   | -   | 566  | 0    | R.EVQIVTTAMTLK.D                                 |
| 1373.7740 | 1372.7668 | 1372.7310 | 26.0   | 483   | -   | 494  | 1    | R.EVTDQRGNITLK.A                                 |
| 1475.8714 | 1474.8641 | 1474.7497 | 77.6   | 166   | -   | 178  | 1    | R.GNMSQVRQLVGM.R.G                               |
| 1545.9206 | 1544.9134 | 1544.7981 | 74.6   | 461   | -   | 474  | 1    | K.ATKDVICDLAQV.R.Y                               |
| 1729.9719 | 1728.9646 | 1728.8431 | 70.3   | 125   | -   | 138  | 1    | R.HTKVIDTWTETNER.L                               |
| 1834.1144 | 1833.1072 | 1832.9381 | 92.2   | 361   | -   | 378  | 1    | R.TFPTGGVSTAETGVVRSK.V                           |
| 1842.1348 | 1841.1275 | 1840.9618 | 90.0   | 970   | -   | 985  | 0    | R.LGRPYMVPDPSVLHVR.D + Oxidation (M)             |
| 1941.1169 | 1940.1096 | 1940.0102 | 51.2   | 1157  | -   | 1174 | 0    | R.VEDAGDTTLPLGELIELR.Q                           |
| 1972.1537 | 1971.1464 | 1971.0538 | 47.0   | 986   | -   | 1003 | 1    | R.DGNLVQRGDGLALLVFER.Q                           |
| 2105.2985 | 2104.2913 | 2104.1052 | 88.4   | 77    | -   | 96   | 1    | K.YATQAASVISVDDLVKPEAK.K                         |
| 2141.2573 | 2140.2500 | 2140.1052 | 67.7   | 72    | -   | 91   | 1    | K.DLGFKYATQAASVISVDDLK.V                         |
| 2384.1747 | 2383.1674 | 2383.0685 | 41.5   | 145   | -   | 165  | 1    | K.KNFDENAPLNSVMMANSARG.G + 2 Oxidation (M)       |
| 2888.5748 | 2887.5675 | 2887.4637 | 35.9   | 1175  | -   | 1202 | 0    | R.QVEDTNQAMAITGGAPAEFTFVLLGITK.A + Oxidation (M) |

**No match to:** 758.4449, 761.4539, 842.5599, 870.5871, 931.5710, 965.5635, 1003.6035, 1046.6100, 1062.6412, 1064.6582, 1075.6517, 1076.6699, 1118.6055, 1133.6818, 1140.6556, 1149.6929, 1158.7030, 1172.7483, 1179.6837, 1234.7577, 1277.7544, 1285.7582, 1296.7598, 1308.7634, 1340.7881, 1367.8244, 1390.7958, 1434.8763, 1457.8382, 1488.8863, 1493.8532, 1530.8044, 1537.8684, 1553.9584, 1561.9388, 1590.9204, 1598.9555, 1615.9930, 1638.9781, 1657.9450, 1683.0081, 1690.9261, 1699.9587, 1707.9303, 1713.9658, 1764.0939, 1786.0298, 1791.8986, 1804.0504, 1822.0336, 1839.0705, 1858.1460, 1862.0788, 1930.0964, 1955.1238, 1970.2165, 1985.1441, 1998.1688, 2076.2873, 2083.1868, 2126.2672, 2164.2353, 2203.3329, 2211.3104, 2215.3655, 2222.2808, 2235.3499, 2274.3577, 2284.3628, 2296.2822, 2322.3983, 2343.2148, 2357.2678, 2399.2446, 2418.3632, 2440.5128, 2592.4853, 2641.5621, 2653.5041, 2705.3800, 2717.3219, 3264.6235

**12. PAT\_SALAR** Mass: 50192 Score: 61 Expect: 0.28 Matches: 9

Putrescine aminotransferase OS=Salmonella arizonae (strain ATCC BAA-731 / CDC346-86 / RSK2980) OX=41514 GN=patA PE=3 SV=2

| Observed  | Mr (expt) | Mr (calc) | ppm    | Start | End | Miss | Ions | Peptide                                 |
|-----------|-----------|-----------|--------|-------|-----|------|------|-----------------------------------------|
| 1259.7439 | 1258.7367 | 1258.6241 | 89.5   | 209   | -   | 219  | 0    | R.HVTFGNINAMR.M                         |
| 1367.8244 | 1366.8172 | 1366.8548 | -27.51 | 127   | -   | 140  | 1    | R.AILAKTLAALTPGK.L                      |
| 1488.8863 | 1487.8790 | 1487.7521 | 85.3   | 44    | -   | 55   | 1    | K.EHVNPGFLEYRK.S                        |
| 1545.9206 | 1544.9134 | 1544.8311 | 53.3   | 114   | -   | 126  | 0    | 23 K.QPLHSQELLDPLR.A                    |
| 1683.0081 | 1682.0008 | 1681.8536 | 87.5   | 372   | -   | 385  | 1    | R.QLAREYPLDVHDAR.G                      |
| 1690.9261 | 1689.9189 | 1689.8356 | 49.3   | 444   | -   | 459  | 1    | K.SARNALAAQVSVVEEV.- + Oxidation (M)    |
| 2126.2672 | 2125.2599 | 2125.0659 | 91.3   | 4     | -   | 23   | 0    | R.LPSSASALACCAHALNLIEK.R                |
| 2222.2808 | 2221.2736 | 2221.0725 | 90.5   | 143   | -   | 162  | 1    | K.YSFFCNSGTSVEAALKLAK.A                 |
| 2399.2446 | 2398.2373 | 2398.1331 | 43.5   | 259   | -   | 279  | 1    | R.KLCDFGALMILDEVQTMGR.T + Oxidation (M) |

**No match to:** 758.4449, 761.4539, 773.4587, 807.4419, 842.5599, 870.5871, 931.5710, 965.5635, 1003.6035, 1046.6100, 1062.6412, 1064.6582, 1075.6517, 1076.6699, 1118.6055, 1133.6818, 1140.6556, 1149.6929, 1158.7030, 1165.6616, 1172.7483, 1179.6837, 1234.7577, 1277.7544, 1285.7582, 1296.7598, 1308.7634, 1320.6892, 1333.7866, 1340.7881, 1373.7740, 1390.7958, 1434.8763, 1457.8382, 1475.8714, 1493.8532, 1530.8044, 1537.8684, 1553.9584, 1561.9388, 1590.9204, 1598.9555, 1615.9930, 1638.9781, 1657.9450, 1699.9587, 1707.9303, 1713.9658, 1729.9719, 1764.0939, 1786.0298, 1791.8986, 1804.0504, 1822.0336, 1834.1144, 1839.0705, 1842.1348, 1858.1460, 1862.0788, 1930.0964, 1941.1169, 1955.1238, 1970.2165, 1972.1537, 1985.1441, 1998.1688, 2076.2873, 2083.1868, 2105.2985, 2141.2573, 2164.2353, 2203.3329, 2211.3104, 2215.3655, 2235.3499, 2274.3577, 2284.3628, 2296.2822, 2322.3983, 2343.2148, 2357.2678, 2384.1747, 2418.3632, 2440.5128, 2592.4853, 2641.5621, 2653.5041, 2705.3800, 2717.3219, 2888.5748, 3264.6235

**13. PAT\_SALPB** Mass: 50078 Score: 61 Expect: 0.29 Matches: 9

Putrescine aminotransferase OS=Salmonella paratyphi B (strain ATCC BAA-1250 / SPB7) OX=1016998 GN=patA PE=3 SV=1

| Observed  | Mr (expt) | Mr (calc) | ppm   | Start | End | Miss | Ions | Peptide                                 |
|-----------|-----------|-----------|-------|-------|-----|------|------|-----------------------------------------|
| 1367.8244 | 1366.8172 | 1366.7245 | 67.8  | 33    | -   | 43   | 1    | K.ALNREVIDYFK.E                         |
| 1457.8382 | 1456.8309 | 1456.8362 | -3.61 | 413   | -   | 426  | 1    | R.VLVAGTLNNAKTR.I                       |
| 1488.8863 | 1487.8790 | 1487.7521 | 85.3  | 44    | -   | 55   | 1    | K.EHVNPGFLEYRK.S                        |
| 1545.9206 | 1544.9134 | 1544.8311 | 53.3  | 114   | -   | 126  | 0    | 23 K.QPLHSQELLDPLR.A                    |
| 1690.9261 | 1689.9189 | 1689.8356 | 49.3  | 444   | -   | 459  | 1    | K.SARNALAAQVSVVEEV.- + Oxidation (M)    |
| 1822.0336 | 1821.0263 | 1820.9872 | 21.5  | 194   | -   | 208  | 1    | K.STFRFRFPMLLPGRF.H                     |
| 2076.2873 | 2075.2800 | 2075.1197 | 77.3  | 114   | -   | 131  | 1    | K.QPLHSQELLDPLRAMLAK.T + Oxidation (M)  |
| 2222.2808 | 2221.2736 | 2221.0725 | 90.5  | 143   | -   | 162  | 1    | K.YSFFCNSGTSVEAALKLAK.A                 |
| 2399.2446 | 2398.2373 | 2398.1331 | 43.5  | 259   | -   | 279  | 1    | R.KLCDFGALMILDEVQTMGR.T + Oxidation (M) |

**No match to:** 758.4449, 761.4539, 773.4587, 807.4419, 842.5599, 870.5871, 931.5710, 965.5635, 1003.6035, 1046.6100, 1062.6412, 1064.6582, 1075.6517, 1076.6699, 1118.6055, 1133.6818, 1140.6556, 1149.6929, 1158.7030, 1165.6616, 1172.7483, 1179.6837, 1234.7577, 1259.7439, 1277.7544, 1285.7582, 1296.7598, 1308.7634, 1320.6892, 1333.7866, 1340.7881, 1373.7740, 1390.7958, 1434.8763, 1475.8714, 1493.8532, 1530.8044, 1537.8684, 1553.9584, 1561.9388, 1590.9204, 1598.9555, 1615.9930, 1638.9781, 1657.9450, 1683.0081, 1699.9587, 1707.9303, 1713.9658, 1729.9719, 1764.0939, 1786.0298, 1791.8986, 1804.0504, 1834.1144, 1839.0705, 1842.1348, 1858.1460, 1862.0788, 1930.0964, 1941.1169, 1955.1238, 1970.2165, 1972.1537, 1985.1441, 1998.1688, 2083.1868, 2105.2985, 2126.2672, 2141.2573, 2164.2353, 2203.3329, 2211.3104, 2215.3655, 2235.3499, 2274.3577, 2284.3628, 2296.2822, 2322.3983, 2343.2148, 2357.2678, 2384.1747, 2418.3632, 2440.5128, 2592.4853, 2641.5621, 2653.5041, 2705.3800, 2717.3219, 2888.5748, 3264.6235

**14. RPOC2\_PROMS** Mass: 150243 Score: 59 Expect: 0.43 Matches: 18

DNA-directed RNA polymerase subunit beta' OS=Prochlorococcus marinus (strain AS9601) OX=146891 GN=rpoC2 PE=3 SV=1

| Observed  | Mr (expt) | Mr (calc) | ppm  | Start | End | Miss | Ions | Peptide                              |
|-----------|-----------|-----------|------|-------|-----|------|------|--------------------------------------|
| 773.4587  | 772.4514  | 772.4443  | 9.21 | 490   | -   | 496  | 0    | R.QGNITLK.A                          |
| 807.4419  | 806.4346  | 806.3705  | 79.5 | 166   | -   | 172  | 0    | R.GNMSQVR.Q + Oxidation (M)          |
| 1046.6100 | 1045.6027 | 1045.5291 | 70.4 | 253   | -   | 262  | 0    | R.SIVVEAEDGK.F                       |
| 1062.6412 | 1061.6339 | 1061.5757 | 54.8 | 404   | -   | 412  | 0    | K.QAEVDFILK.I                        |
| 1179.6837 | 1178.6765 | 1178.6547 | 18.5 | 799   | -   | 808  | 1    | R.LTYKDGELIK.S                       |
| 1340.7881 | 1339.7808 | 1339.7208 | 44.8 | 413   | -   | 425  | 1    | K.IVPQGNNSGKAQK.I                    |
| 1373.7740 | 1372.7668 | 1372.7310 | 26.0 | 485   | -   | 496  | 1    | K.EVTDQRGNITLK.A                     |
| 1475.8714 | 1474.8641 | 1474.7497 | 77.6 | 166   | -   | 178  | 1    | R.GNMSQVRQLVGM.R.G                   |
| 1530.8044 | 1529.7971 | 1529.7508 | 30.3 | 57    | -   | 71   | 0    | K.THGTAI TAAMADNLK.D + Oxidation (M) |

1537.8684 1536.8611 1536.9715 -71.83 849 - 861 1 --- R.LNLVILESILVRR.D
1545.9206 1544.9134 1544.7981 74.6 463 - 476 1 13 K.ATKDVICDLAQV.R.Y
1713.9658 1712.9585 1712.8655 54.3 557 - 571 0 --- R.EVQIVTSMSTLNF.K.L + Oxidation (M)
1729.9719 1728.9646 1728.8431 70.3 125 - 138 1 --- R.HTKVIDTWTETNER.L
1955.1238 1954.1166 1954.0259 46.4 1159 - 1176 0 --- R.IEDAGDTLLLPGLIELR.Q
2141.2573 2140.2500 2140.1052 67.7 72 - 91 1 --- K.DLGFQYATQAASVISVDDLK.V
2235.3499 2234.3426 2234.1907 68.0 685 - 704 1 --- K.DIFSQTSQIVTQTQNDILR.E
2343.2148 2342.2075 2342.1424 27.8 951 - 971 1 --- K.SIKSTFCGEEIEVSNSSVTLR.Y
2888.5748 2887.5675 2887.4637 35.9 1177 - 1204 0 --- R.QVEDTNQAMAITGGAPAEFTPVLLGITK.A + Oxidation (M)
No match to: 758.4449, 761.4539, 842.5599, 870.5871, 931.5710, 965.5635, 1003.6035, 1064.6582, 1075.6517, 1076.6699, 1118.6055, 1133.6818, 1140.6556, 1149.6929, 1158.7030, 1165.6616, 1172.7483, 1234.7577, 1259.7439, 1277.7544, 1285.7582, 1296.7598, 1308.7634, 1320.6892, 1333.7866, 1367.8244, 1390.7958, 1434.8763, 1457.8382, 1488.8863, 1493.8532, 1553.9584, 1561.9388, 1590.9204, 1598.9555, 1615.9930, 1638.9781, 1657.9450, 1683.0081, 1690.9261, 1699.9587, 1707.9303, 1764.0939, 1786.0298, 1791.8986, 1804.0504, 1822.0336, 1834.1144, 1839.0705, 1842.1348, 1858.1460, 1862.0788, 1930.0964, 1941.1169, 1970.2165, 1972.1537, 1985.1441, 1998.1688, 2076.2873, 2083.1868, 2105.2985, 2126.2672, 2164.2353, 2203.3329, 2211.3104, 2215.3655, 2222.2808, 2274.3577, 2284.3628, 2296.2822, 2322.3983, 2357.2678, 2384.1747, 2399.2446, 2418.3632, 2440.5128, 2592.4853, 2641.5621, 2653.5041, 2705.3800, 2717.3219, 3264.6235

15. RPOC2\_PROMO Mass: 150258 Score: 57 Expect: 0.67 Matches: 18

DNA-directed RNA polymerase subunit beta' OS=Prochlorococcus marinus (strain MIT 9301) OX=167546 GN=rpoC2 PE=3 SV=1

Observed Mr(expt) Mr(calc) ppm Start End Miss Ions Peptide
761.4539 760.4466 760.3967 65.7 922 - 927 1 --- R.EEDKIK.I
773.4587 772.4514 772.4443 9.21 490 - 496 0 --- R.QGNITLK.A
807.4419 806.4346 806.3705 79.5 166 - 172 0 --- R.GNMSQVR.Q + Oxidation (M)
1046.6100 1045.6027 1045.5291 70.4 253 - 262 0 --- R.SIVVEAEDGK.F
1062.6412 1061.6339 1061.5757 54.8 404 - 412 0 --- K.QADEVDFILK.I
1140.6556 1139.6483 1139.6298 16.2 1107 - 1116 0 --- K.DQKPLIEAAR.E
1179.6837 1178.6765 1178.6547 18.5 799 - 808 1 --- R.LTYKDGELIK.S
1373.7740 1372.7668 1372.7310 26.0 485 - 496 1 --- K.EVTDROGNITLK.A
1475.8714 1474.8641 1474.7497 77.6 166 - 178 1 --- R.GNMSQVRQLVGM.R.G
1537.8684 1536.8611 1536.9715 -71.83 849 - 861 1 --- R.LNLVILESILVRR.D
1545.9206 1544.9134 1544.7981 74.6 463 - 476 1 13 K.ATKDVICDLAQV.R.Y
1713.9658 1712.9585 1712.8655 54.3 557 - 571 0 --- R.EVQIVTSMSTLNF.K.L + Oxidation (M)
1729.9719 1728.9646 1728.8431 70.3 125 - 138 1 --- R.HTKVIDTWTETNER.L
1955.1238 1954.1166 1954.0259 46.4 1159 - 1176 0 --- R.IEDAGDTLLLPGLIELR.Q
2105.2985 2104.2913 2104.1052 88.4 77 - 96 1 --- K.YATQAASVISVDDLK.VPEAK.Q
2141.2573 2140.2500 2140.1052 67.7 72 - 91 1 --- K.DLGFQYATQAASVISVDDLK.V
2235.3499 2234.3426 2234.1907 68.0 685 - 704 1 --- K.DIFSQTSQIVTQTQNDILR.E
2888.5748 2887.5675 2887.4637 35.9 1177 - 1204 0 --- R.QVEDTNQAMAITGGAPAEFTPVLLGITK.A + Oxidation (M)
No match to: 758.4449, 842.5599, 870.5871, 931.5710, 965.5635, 1003.6035, 1064.6582, 1075.6517, 1076.6699, 1118.6055, 1133.6818, 1149.6929, 1158.7030, 1165.6616, 1172.7483, 1234.7577, 1259.7439, 1277.7544, 1285.7582, 1296.7598, 1308.7634, 1320.6892, 1333.7866, 1340.7881, 1367.8244, 1390.7958, 1434.8763, 1457.8382, 1488.8863, 1493.8532, 1530.8044, 1553.9584, 1561.9388, 1590.9204, 1598.9555, 1615.9930, 1638.9781, 1657.9450, 1683.0081, 1690.9261, 1699.9587, 1707.9303, 1729.9719, 1764.0939, 1786.0298, 1791.8986, 1804.0504, 1822.0336, 1834.1144, 1839.0705, 1842.1348, 1858.1460, 1862.0788, 1930.0964, 1941.1169, 1970.2165, 1972.1537, 1985.1441, 1998.1688, 2076.2873, 2083.1868, 2105.2985, 2126.2672, 2164.2353, 2203.3329, 2211.3104, 2215.3655, 2222.2808, 2274.3577, 2284.3628, 2296.2822, 2322.3983, 2343.2148, 2357.2678, 2384.1747, 2399.2446, 2418.3632, 2440.5128, 2592.4853, 2641.5621, 2653.5041, 2705.3800, 2717.3219, 3264.6235

16. RL9\_PARKL Mass: 16075 Score: 57 Expect: 0.68 Matches: 5

50S ribosomal protein L9 OS=Paraburkholderia xenovorans (strain LB400) OX=266265 GN=rplI PE=3 SV=1

Observed Mr(expt) Mr(calc) ppm Start End Miss Ions Peptide
1003.6035 1002.5962 1002.5783 17.9 1 - 8 0 --- -.MQIILLEK.V + Oxidation (M)
1158.7030 1157.6958 1157.6404 47.8 72 - 82 0 --- K.LAGSTVQINQK.A
1713.9658 1712.9585 1712.9169 24.3 72 - 88 1 24 K.LAGSTVQINQKAGVDGR.L
2126.2672 2125.2599 2125.1491 52.2 62 - 82 1 --- K.LAAAQAQGEKLAGSTVQINQK.A
2203.3329 2202.3256 2202.1644 73.2 83 - 104 1 --- K.AGVDRGLFGSVTNADIAEALVK.Q
No match to: 758.4449, 761.4539, 773.4587, 807.4419, 842.5599, 870.5871, 931.5710, 965.5635, 1046.6100, 1062.6412, 1064.6582, 1075.6517, 1076.6699, 1118.6055, 1133.6818, 1140.6556, 1149.6929, 1158.7030, 1165.6616, 1172.7483, 1234.7577, 1259.7439, 1277.7544, 1285.7582, 1296.7598, 1308.7634, 1320.6892, 1333.7866, 1340.7881, 1367.8244, 1373.7740, 1390.7958, 1434.8763, 1457.8382, 1475.8714, 1488.8863, 1493.8532, 1530.8044, 1537.8684, 1545.9206, 1553.9584, 1561.9388, 1590.9204, 1598.9555, 1615.9930, 1638.9781, 1657.9450, 1683.0081, 1690.9261, 1699.9587, 1707.9303, 1729.9719, 1764.0939, 1786.0298, 1791.8986, 1804.0504, 1822.0336, 1834.1144, 1839.0705, 1842.1348, 1858.1460, 1862.0788, 1930.0964, 1941.1169, 1955.1238, 1970.2165, 1972.1537, 1985.1441, 1998.1688, 2076.2873, 2083.1868, 2105.2985, 2141.2573, 2164.2353, 2211.3104, 2215.3655, 2222.2808, 2235.3499, 2274.3577, 2284.3628, 2296.2822, 2322.3983, 2343.2148, 2357.2678, 2384.1747, 2399.2446, 2418.3632, 2440.5128, 2592.4853, 2641.5621, 2653.5041, 2705.3800, 2717.3219, 2888.5748, 3264.6235

17. RL10\_THIDA Mass: 18640 Score: 56 Expect: 0.92 Matches: 7

50S ribosomal protein L10 OS=Thiobacillus denitrificans (strain ATCC 25259) OX=292415 GN=rplJ PE=3 SV=1

Observed Mr(expt) Mr(calc) ppm Start End Miss Ions Peptide
758.4449 757.4377 757.4559 -24.01 57 - 62 1 --- K.NTLVRR.A
1076.6699 1075.6627 1075.6390 22.0 48 - 56 1 --- K.EGVYLRVLK.N
1475.8714 1474.8641 1474.7814 56.1 32 - 44 1 --- R.GIAVEDMTQLRVK.A + Oxidation (M)
1545.9206 1544.9134 1544.7657 95.6 87 - 100 1 14 K.DPVAAKVMHEFSK.T + Oxidation (M)
1862.0788 1861.0715 1860.9251 78.7 121 - 137 1 --- K.DVGNLAMSPTSRELLSK.L + Oxidation (M)
2145.3655 2144.3582 2144.2008 71.1 10 - 31 0 --- K.AVVAEVAQAQVAAQTVVVAEYR.G
2343.2148 2342.2075 2342.2958 -37.68 9 - 31 1 --- K.KAVVAEVAQAQVAAQTVVVAEYR.G
No match to: 761.4539, 773.4587, 807.4419, 842.5599, 870.5871, 931.5710, 965.5635, 1003.6035, 1046.6100, 1062.6412, 1064.6582, 1075.6517, 1118.6055, 1133.6818, 1140.6556, 1149.6929, 1158.7030, 1165.6616, 1172.7483, 1179.6837, 1234.7577, 1259.7439, 1277.7544, 1285.7582, 1296.7598, 1308.7634, 1320.6892, 1333.7866, 1340.7881, 1367.8244, 1373.7740, 1390.7958, 1434.8763, 1457.8382, 1488.8863, 1493.8532, 1530.8044, 1537.8684, 1553.9584, 1561.9388, 1590.9204, 1598.9555, 1615.9930, 1638.9781, 1657.9450, 1683.0081, 1690.9261, 1699.9587, 1707.9303, 1713.9658, 1729.9719, 1764.0939, 1786.0298, 1791.8986, 1804.0504, 1822.0336, 1834.1144, 1839.0705, 1842.1348, 1858.1460, 1862.0788, 1930.0964, 1941.1169, 1955.1238, 1970.2165, 1972.1537, 1985.1441, 1998.1688, 2076.2873, 2083.1868, 2105.2985, 2126.2672, 2141.2573, 2164.2353, 2203.3329, 2211.3104, 2222.2808, 2235.3499, 2274.3577, 2284.3628, 2296.2822, 2322.3983, 2357.2678, 2384.1747, 2399.2446, 2418.3632, 2440.5128, 2592.4853, 2641.5621, 2653.5041, 2705.3800, 2717.3219, 2888.5748, 3264.6235

18. EPMA\_SALAR Mass: 37284 Score: 55 Expect: 0.96 Matches: 3

Elongation factor P--(R)-beta-lysine ligase OS=Salmonella arizonae (strain ATCC BAA-731 / CDC346-86 / RSK2980) OX=41514 GN=epmA

Observed Mr(expt) Mr(calc) ppm Start End Miss Ions Peptide
1076.6699 1075.6627 1075.5808 76.1 20 - 28 1 --- R.AAIMTEIRR.F + Oxidation (M)
1561.9388 1560.9315 1560.7905 90.4 84 - 97 0 47 R.LLAAGCGPVFQLCR.S
1985.1441 1984.1368 1984.0378 49.9 2 - 19 1 --- M.SETATWQPSASVNPMLKR.A
No match to: 758.4449, 761.4539, 773.4587, 807.4419, 842.5599, 870.5871, 931.5710, 965.5635, 1003.6035, 1046.6100, 1062.6412, 1064.6582, 1075.6517, 1118.6055, 1133.6818, 1140.6556, 1149.6929, 1158.7030, 1165.6616, 1172.7483, 1179.6837, 1234.7577,

1259.7439, 1277.7544, 1285.7582, 1296.7598, 1308.7634, 1320.6892, 1333.7866, 1340.7881, 1367.8244, 1373.7740, 1390.7958, 1434.8763, 1457.8382, 1475.8714, 1488.8863, 1493.8532, 1530.8044, 1537.8684, 1545.9206, 1553.9584, 1590.9204, 1598.9555, 1615.9930, 1638.9781, 1657.9450, 1683.0081, 1690.9261, 1699.9587, 1707.9303, 1713.9658, 1729.9719, 1764.0939, 1786.0298, 1791.8986, 1804.0504, 1822.0336, 1834.1144, 1839.0705, 1842.1348, 1858.1460, 1862.0788, 1930.0964, 1941.1169, 1955.1238, 1970.2165, 1972.1537, 1998.1688, 2076.2873, 2083.1868, 2105.2985, 2126.2672, 2141.2573, 2164.2353, 2203.3329, 2211.3104, 2215.3655, 2222.2808, 2235.3499, 2274.3577, 2284.3628, 2296.2822, 2322.3983, 2343.2148, 2357.2678, 2399.2446, 2418.3632, 2440.5128, 2592.4853, 2641.5621, 2653.5041, 2705.3800, 2717.3219, 2888.5748, 3264.6235

19. [IF2\\_BACFN](#) Mass: 112675 Score: 55 Expect: 1.2 Matches: 13  
 Translation initiation factor IF-2 OS=Bacteroides fragilis (strain ATCC 25285 / DSM 2151 / JCM 11019 / NCTC 9343) OX=272559 GN=i

| Observed  | Mr (expt) | Mr (calc) | ppm    | Start | End | Miss | Ions | Peptide |                                          |
|-----------|-----------|-----------|--------|-------|-----|------|------|---------|------------------------------------------|
| 1062.6412 | 1061.6339 | 1061.5618 | 67.9   | 63    | -   | 70   | 1    | ---     | R.FIQERQNK.D                             |
| 1076.6699 | 1075.6627 | 1075.6026 | 55.8   | 235   | -   | 243  | 0    | ---     | K.IRPTEFVSK.I                            |
| 1165.6616 | 1164.6543 | 1164.5458 | 93.2   | 734   | -   | 742  | 1    | ---     | K.AMFNERNQR.V                            |
| 1259.7439 | 1258.7367 | 1258.7285 | 6.47   | 108   | -   | 118  | 1    | ---     | K.FKPVGKIDLDK.L                          |
| 1296.7598 | 1295.7525 | 1295.6357 | 90.1   | 73    | -   | 84   | 1    | ---     | R.NKASVSDIGYDK.K                         |
| 1340.7881 | 1339.7808 | 1339.6693 | 83.2   | 38    | -   | 48   | 0    | ---     | K.ITEEQYAMLVK.E + Oxidation (M)          |
| 1488.8863 | 1487.8790 | 1487.7467 | 88.9   | 381   | -   | 393  | 1    | ---     | K.QEVSEEDVARQVK.E                        |
| 1561.9388 | 1560.9315 | 1560.8107 | 77.4   | 690   | -   | 704  | 1    | 20      | R.NATGSIESTLDKGR.G                       |
| 1713.9658 | 1712.9585 | 1712.9937 | -20.56 | 806   | -   | 820  | 1    | 8       | R.RIALGNFQELNVIVK.G                      |
| 1842.1348 | 1841.1275 | 1840.9716 | 84.7   | 674   | -   | 689  | 1    | ---     | K.VLLEAEMLDLKNPNR.N + Oxidation (M)      |
| 2343.2148 | 2342.2075 | 2342.2477 | -17.14 | 664   | -   | 684  | 1    | ---     | K.GLGVPELMEKVLLEAEMLDLKA + Oxidation (M) |
| 2384.1747 | 2383.1674 | 2383.2669 | -41.73 | 584   | -   | 606  | 1    | ---     | R.GAKVTDIAIIVAAADDVMPQTK.E               |
| 2888.5748 | 2887.5675 | 2887.3698 | 68.5   | 638   | -   | 662  | 1    | ---     | K.ETLAQMNYLVEEWGGYQSDISAK.K              |

No match to: 758.4449, 761.4539, 773.4587, 807.4419, 842.5599, 870.5871, 931.5710, 965.5635, 1003.6035, 1046.6100, 1064.6582, 1075.6517, 1118.6055, 1133.6818, 1140.6556, 1149.6929, 1158.7030, 1172.7483, 1179.6837, 1234.7577, 1277.7544, 1285.7582, 1308.7634, 1320.6892, 1333.7866, 1367.8244, 1373.7740, 1390.7958, 1434.8763, 1457.8382, 1475.8714, 1493.8532, 1530.8044, 1537.8684, 1545.9206, 1553.9584, 1590.9204, 1598.9555, 1615.9930, 1638.9781, 1657.9450, 1683.0081, 1690.9261, 1699.9587, 1707.9303, 1729.9719, 1764.0939, 1786.0298, 1791.8986, 1804.0504, 1822.0336, 1834.1144, 1839.0705, 1858.1460, 1862.0788, 1930.0964, 1941.1169, 1955.1238, 1970.2165, 1972.1537, 1985.1441, 1998.1688, 2076.2873, 2083.1868, 2105.2985, 2126.2672, 2141.2573, 2164.2353, 2203.3329, 2211.3104, 2215.3655, 2222.2808, 2235.3499, 2274.3577, 2284.3628, 2296.2822, 2322.3983, 2357.2678, 2399.2446, 2418.3632, 2440.5128, 2592.4853, 2641.5621, 2653.5041, 2705.3800, 2717.3219, 3264.6235

20. [IF2\\_BACFR](#) Mass: 112675 Score: 55 Expect: 1.2 Matches: 13  
 Translation initiation factor IF-2 OS=Bacteroides fragilis (strain YCH46) OX=295405 GN=infB PE=3 SV=1

| Observed  | Mr (expt) | Mr (calc) | ppm    | Start | End | Miss | Ions | Peptide |                                          |
|-----------|-----------|-----------|--------|-------|-----|------|------|---------|------------------------------------------|
| 1062.6412 | 1061.6339 | 1061.5618 | 67.9   | 63    | -   | 70   | 1    | ---     | R.FIQERQNK.D                             |
| 1076.6699 | 1075.6627 | 1075.6026 | 55.8   | 235   | -   | 243  | 0    | ---     | K.IRPTEFVSK.I                            |
| 1165.6616 | 1164.6543 | 1164.5458 | 93.2   | 734   | -   | 742  | 1    | ---     | K.AMFNERNQR.V                            |
| 1259.7439 | 1258.7367 | 1258.7285 | 6.47   | 108   | -   | 118  | 1    | ---     | K.FKPVGKIDLDK.L                          |
| 1296.7598 | 1295.7525 | 1295.6357 | 90.1   | 73    | -   | 84   | 1    | ---     | R.NKASVSDIGYDK.K                         |
| 1340.7881 | 1339.7808 | 1339.6693 | 83.2   | 38    | -   | 48   | 0    | ---     | K.ITEEQYAMLVK.E + Oxidation (M)          |
| 1488.8863 | 1487.8790 | 1487.7467 | 88.9   | 381   | -   | 393  | 1    | ---     | K.QEVSEEDVARQVK.E                        |
| 1561.9388 | 1560.9315 | 1560.8107 | 77.4   | 690   | -   | 704  | 1    | 20      | R.NATGSIESTLDKGR.G                       |
| 1713.9658 | 1712.9585 | 1712.9937 | -20.56 | 806   | -   | 820  | 1    | 8       | R.RIALGNFQELNVIVK.G                      |
| 1842.1348 | 1841.1275 | 1840.9716 | 84.7   | 674   | -   | 689  | 1    | ---     | K.VLLEAEMLDLKNPNR.N + Oxidation (M)      |
| 2343.2148 | 2342.2075 | 2342.2477 | -17.14 | 664   | -   | 684  | 1    | ---     | K.GLGVPELMEKVLLEAEMLDLKA + Oxidation (M) |
| 2384.1747 | 2383.1674 | 2383.2669 | -41.73 | 584   | -   | 606  | 1    | ---     | R.GAKVTDIAIIVAAADDVMPQTK.E               |
| 2888.5748 | 2887.5675 | 2887.3698 | 68.5   | 638   | -   | 662  | 1    | ---     | K.ETLAQMNYLVEEWGGYQSDISAK.K              |

No match to: 758.4449, 761.4539, 773.4587, 807.4419, 842.5599, 870.5871, 931.5710, 965.5635, 1003.6035, 1046.6100, 1064.6582, 1075.6517, 1118.6055, 1133.6818, 1140.6556, 1149.6929, 1158.7030, 1172.7483, 1179.6837, 1234.7577, 1277.7544, 1285.7582, 1308.7634, 1320.6892, 1333.7866, 1367.8244, 1373.7740, 1390.7958, 1434.8763, 1457.8382, 1475.8714, 1493.8532, 1530.8044, 1537.8684, 1545.9206, 1553.9584, 1590.9204, 1598.9555, 1615.9930, 1638.9781, 1657.9450, 1683.0081, 1690.9261, 1699.9587, 1707.9303, 1729.9719, 1764.0939, 1786.0298, 1791.8986, 1804.0504, 1822.0336, 1834.1144, 1839.0705, 1858.1460, 1862.0788, 1930.0964, 1941.1169, 1955.1238, 1970.2165, 1972.1537, 1985.1441, 1998.1688, 2076.2873, 2083.1868, 2105.2985, 2126.2672, 2141.2573, 2164.2353, 2203.3329, 2211.3104, 2215.3655, 2222.2808, 2235.3499, 2274.3577, 2284.3628, 2296.2822, 2322.3983, 2357.2678, 2399.2446, 2418.3632, 2440.5128, 2592.4853, 2641.5621, 2653.5041, 2705.3800, 2717.3219, 3264.6235

## Search Parameters

Type of search : MS/MS Ion Search  
 Enzyme : Trypsin  
 Fixed modifications : [Carbamidomethyl \(C\)](#)  
 Variable modifications : [Oxidation \(M\)](#)  
 Mass values : Monoisotopic  
 Protein Mass : Unrestricted  
 Peptide Mass Tolerance : ± 100 ppm  
 Fragment Mass Tolerance : ± 2 Da  
 Max Missed Cleavages : 1  
 Instrument type : MALDI-TOF-TOF

Query1 (758.4449,1+): <no title>  
 Query2 (761.4539,1+): <no title>  
 Query3 (773.4587,1+): <no title>  
 Query4 (807.4419,1+): <no title>  
 Query5 (842.5599,1+): <no title>  
 Query6 (870.5871,1+): <no title>  
 Query7 (931.5710,1+): <no title>  
 Query8 (965.5635,1+): <no title>  
 Query9 (1003.6035,1+): <no title>  
 Query10 (1046.6100,1+): <no title>  
 Query11 (1062.6412,1+): <no title>  
 Query12 (1064.6582,1+): <no title>  
 Query13 (1075.6517,1+): <no title>  
 Query14 (1076.6699,1+): <no title>  
 Query15 (1118.6055,1+): <no title>  
 Query16 (1133.6818,1+): <no title>  
 Query17 (1140.6556,1+): <no title>  
 Query18 (1149.6929,1+): <no title>  
 Query19 (1158.7030,1+): <no title>  
 Query20 (1165.6616,1+): <no title>  
 Query21 (1172.7483,1+): <no title>  
 Query22 (1179.6837,1+): <no title>  
 Query23 (1234.7577,1+): <no title>  
 Query24 (1259.7439,1+): <no title>  
 Query25 (1277.7544,1+): <no title>  
 Query26 (1285.7582,1+): <no title>  
 Query27 (1296.7598,1+): <no title>  
 Query28 (1308.7634,1+): <no title>



Query29 (1320.6892,1+) : <no title>  
Query30 (1333.7866,1+) : <no title>  
Query31 (1340.7881,1+) : <no title>  
Query32 (1367.8244,1+) : <no title>  
Query33 (1373.7740,1+) : <no title>  
Query34 (1390.7958,1+) : <no title>  
Query35 (1434.8763,1+) : <no title>  
Query36 (1457.8382,1+) : <no title>  
Query37 (1475.8714,1+) : <no title>  
Query38 (1488.8863,1+) : <no title>  
Query39 (1493.8532,1+) : <no title>  
Query40 (1530.8044,1+) : <no title>  
Query41 (1537.8684,1+) : <no title>  
Query42 (1545.9206,1+) : <no title>  
Query43 (1553.9584,1+) : <no title>  
Query44 (1561.9388,1+) : <no title>  
Query45 (1590.9204,1+) : <no title>  
Query46 (1598.9555,1+) : <no title>  
Query47 (1615.9930,1+) : <no title>  
Query48 (1638.9781,1+) : <no title>  
Query49 (1657.9450,1+) : <no title>  
Query50 (1683.0081,1+) : <no title>  
Query51 (1690.9261,1+) : <no title>  
Query52 (1699.9587,1+) : <no title>  
Query53 (1707.9303,1+) : <no title>  
Query54 (1713.9658,1+) : <no title>  
Query55 (1729.9719,1+) : <no title>  
Query56 (1764.0939,1+) : <no title>  
Query57 (1786.0298,1+) : <no title>  
Query58 (1791.8986,1+) : <no title>  
Query59 (1804.0504,1+) : <no title>  
Query60 (1822.0336,1+) : <no title>  
Query61 (1834.1144,1+) : <no title>  
Query62 (1839.0705,1+) : <no title>  
Query63 (1842.1348,1+) : <no title>  
Query64 (1858.1460,1+) : <no title>  
Query65 (1862.0788,1+) : <no title>  
Query66 (1930.0964,1+) : <no title>  
Query67 (1941.1169,1+) : <no title>  
Query68 (1955.1238,1+) : <no title>  
Query69 (1970.2165,1+) : <no title>  
Query70 (1972.1537,1+) : <no title>  
Query71 (1985.1441,1+) : <no title>  
Query72 (1998.1688,1+) : <no title>  
Query73 (2076.2873,1+) : <no title>  
Query74 (2083.1868,1+) : <no title>  
Query75 (2105.2985,1+) : <no title>  
Query76 (2126.2672,1+) : <no title>  
Query77 (2141.2573,1+) : <no title>  
Query78 (2164.2353,1+) : <no title>  
Query79 (2203.3329,1+) : <no title>  
Query80 (2211.3104,1+) : <no title>  
Query81 (2215.3655,1+) : <no title>  
Query82 (2222.2808,1+) : <no title>  
Query83 (2235.3499,1+) : <no title>  
Query84 (2274.3577,1+) : <no title>  
Query85 (2284.3628,1+) : <no title>  
Query86 (2296.2822,1+) : <no title>  
Query87 (2322.3983,1+) : <no title>  
Query88 (2343.2148,1+) : <no title>  
Query89 (2357.2678,1+) : <no title>  
Query90 (2384.1747,1+) : <no title>  
Query91 (2399.2446,1+) : <no title>  
Query92 (2418.3632,1+) : <no title>  
Query93 (2440.5128,1+) : <no title>  
Query94 (2592.4853,1+) : <no title>  
Query95 (2641.5621,1+) : <no title>  
Query96 (2653.5041,1+) : <no title>  
Query97 (2705.3800,1+) : <no title>  
Query98 (2717.3219,1+) : <no title>  
Query99 (2888.5748,1+) : <no title>  
Query100 (3264.6235,1+) : <no title>

Mascot: <http://www.matrixscience.com/>

*MALDI MS MS Data Sheet of Pus  
Isolate*

Comment 1

Comment 2

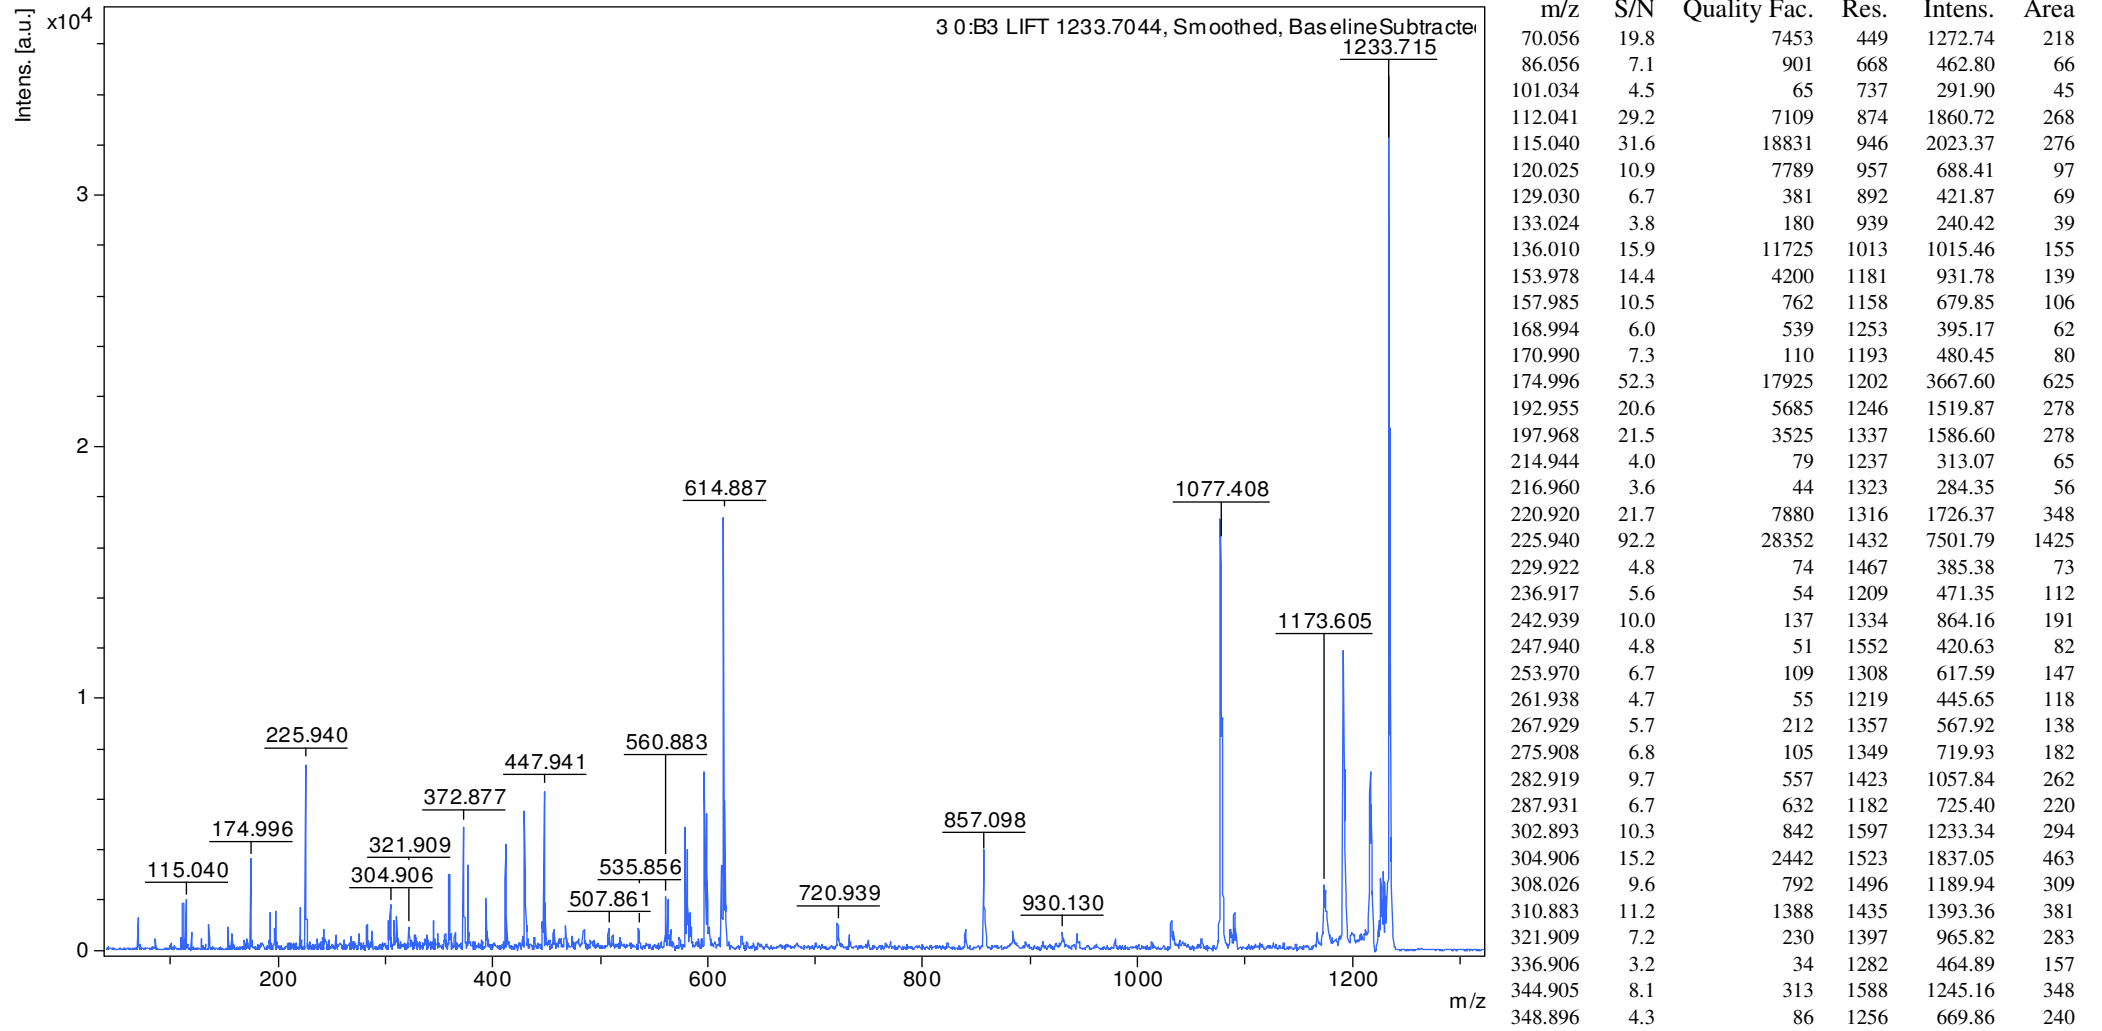

| m/z      | S/N  | Quality | Fac. | Res.     | Intens. | Area |
|----------|------|---------|------|----------|---------|------|
| 359.861  | 18.9 | 9758    | 1560 | 3078.07  | 922     |      |
| 364.889  | 4.4  | 86      | 1376 | 730.03   | 252     |      |
| 372.877  | 28.9 | 21197   | 1578 | 4994.09  | 1545    |      |
| 376.878  | 19.4 | 12806   | 1517 | 3385.31  | 1103    |      |
| 393.963  | 12.0 | 1331    | 1769 | 2176.36  | 642     |      |
| 411.945  | 22.9 | 7575    | 1846 | 4351.83  | 1299    |      |
| 429.943  | 28.6 | 4831    | 1775 | 5669.09  | 1855    |      |
| 447.941  | 31.3 | 26338   | 1922 | 6483.52  | 2062    |      |
| 456.856  | 4.3  | 43      | 1574 | 901.11   | 359     |      |
| 467.843  | 4.5  | 116     | 1405 | 978.95   | 450     |      |
| 507.861  | 4.2  | 176     | 1296 | 935.40   | 517     |      |
| 535.856  | 3.9  | 274     | 1419 | 905.12   | 489     |      |
| 560.883  | 9.2  | 2664    | 1895 | 2159.73  | 928     |      |
| 563.196  | 8.1  | 609     | 1767 | 1875.93  | 869     |      |
| 565.578  | 3.1  | 57      | 1561 | 717.20   | 378     |      |
| 578.895  | 21.1 | 9556    | 1833 | 4883.03  | 2261    |      |
| 581.148  | 16.3 | 2571    | 1687 | 3754.75  | 1898    |      |
| 583.480  | 6.0  | 81      | 1348 | 1378.67  | 877     |      |
| 596.907  | 31.0 | 11345   | 1749 | 7044.03  | 3584    |      |
| 599.107  | 22.6 | 4224    | 1738 | 5131.18  | 2641    |      |
| 601.925  | 3.4  | 74      | 1306 | 771.74   | 532     |      |
| 614.887  | 77.9 | 89722   | 2004 | 17470.26 | 8075    |      |
| 720.939  | 5.6  | 490     | 1311 | 1093.32  | 963     |      |
| 731.945  | 3.3  | 328     | 1592 | 643.56   | 477     |      |
| 840.092  | 4.2  | 535     | 1634 | 779.30   | 687     |      |
| 857.098  | 20.7 | 16675   | 1573 | 3844.99  | 3624    |      |
| 884.075  | 4.0  | 131     | 1054 | 737.39   | 1087    |      |
| 930.130  | 3.9  | 221     | 1557 | 743.49   | 801     |      |
| 943.897  | 3.1  | 156     | 1370 | 600.96   | 753     |      |
| 1031.346 | 5.9  | 135     | 1528 | 1192.27  | 1537    |      |
| 1077.408 | 79.6 | 100182  | 1757 | 16226.36 | 19610   |      |
| 1086.595 | 4.1  | 195     | 1208 | 831.37   | 1482    |      |
| 1090.075 | 7.0  | 1485    | 2070 | 1450.67  | 1517    |      |
| 1167.312 | 4.0  | 159     | 1947 | 640.91   | 798     |      |
| 1173.605 | 16.9 | 1212    | 1363 | 2638.34  | 4734    |      |
| 1176.616 | 7.5  | 233     | 1307 | 1141.23  | 2145    |      |
| 1182.920 | 3.4  | 75      | 1312 | 510.06   | 968     |      |
| 1191.633 | 75.5 | 25712   | 1988 | 10926.44 | 13790   |      |
| 1198.910 | 5.9  | 58      | 1398 | 825.32   | 1509    |      |
| 1201.833 | 3.3  | 88      | 1335 | 458.06   | 879     |      |
| 1204.542 | 3.0  | 33      | 1769 | 417.86   | 604     |      |

| m/z      | S/N   | Quality | Fac. | Res.     | Intens. | Area |
|----------|-------|---------|------|----------|---------|------|
| 1206.553 | 3.7   | 42      | 1770 | 507.85   | 738     |      |
| 1208.612 | 4.6   | 37      | 1520 | 630.43   | 1066    |      |
| 1216.643 | 48.1  | 5324    | 1352 | 6397.60  | 12299   |      |
| 1224.541 | 8.7   | 227     | 1805 | 1138.60  | 1659    |      |
| 1226.837 | 19.6  | 1831    | 2467 | 2560.14  | 2736    |      |
| 1229.158 | 21.1  | 775     | 2791 | 2731.50  | 2588    |      |
| 1231.384 | 17.6  | 43      | 2885 | 2267.64  | 2087    |      |
| 1233.715 | 251.6 | 39482   | 2795 | 32094.42 | 30569   |      |

Comment 1

Comment 2

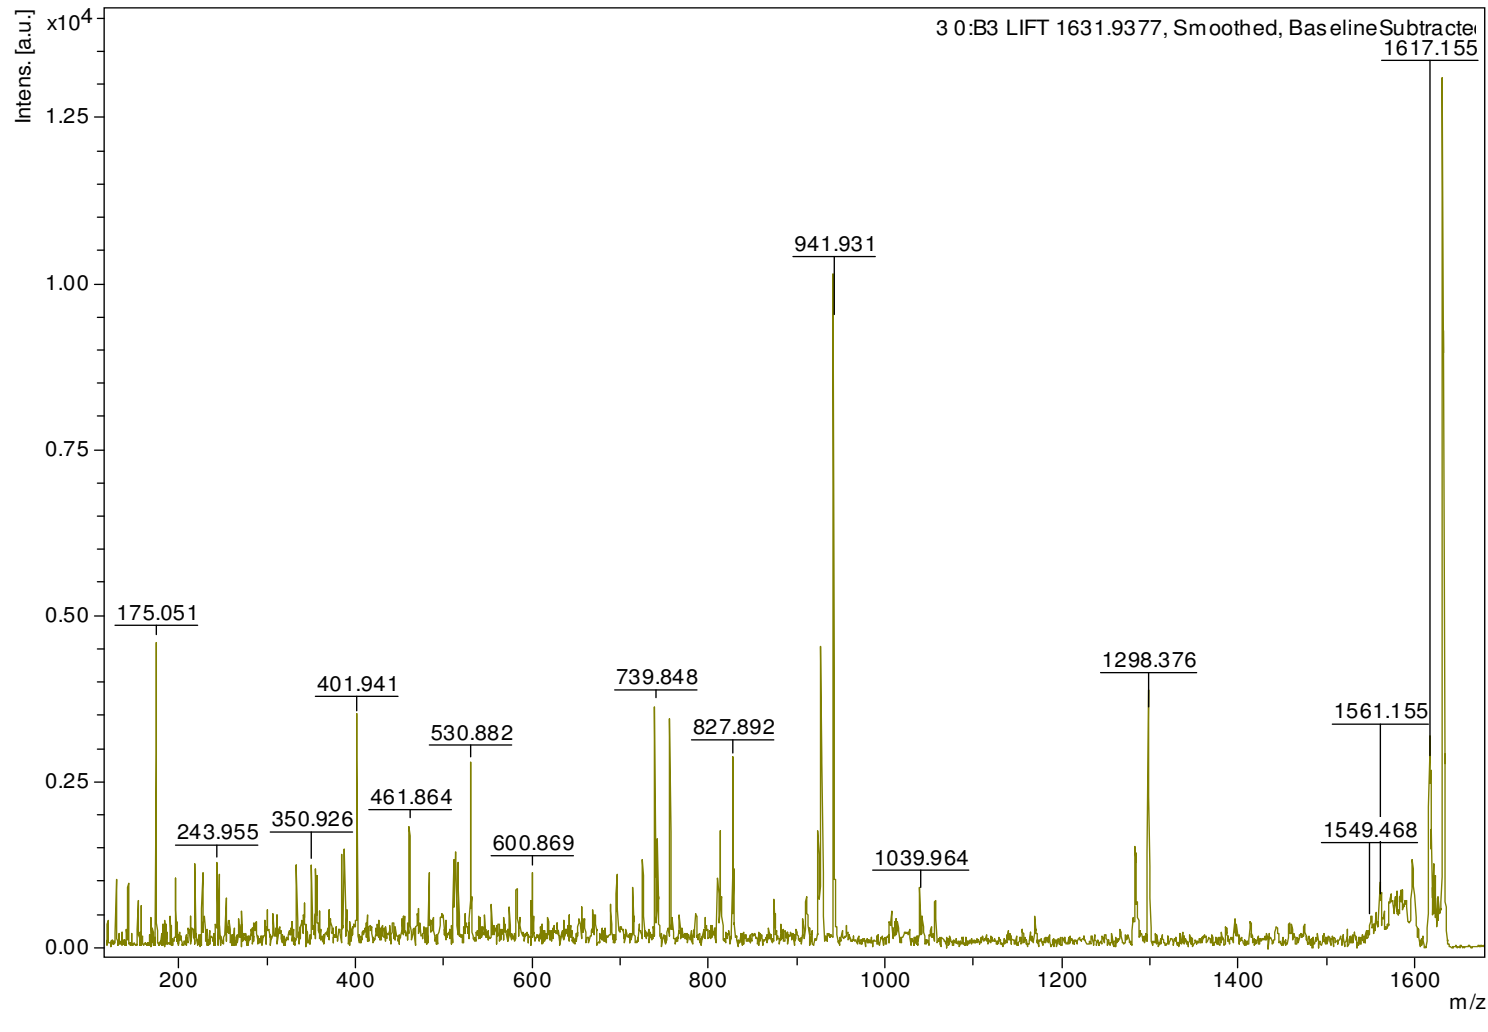

| m/z     | S/N  | Quality | Fac. | Res.    | Intens. | Area |
|---------|------|---------|------|---------|---------|------|
| 70.081  | 5.5  | 306     | 292  | 391.20  | 103     |      |
| 84.096  | 4.5  | 395     | 684  | 322.61  | 44      |      |
| 86.111  | 6.8  | 401     | 558  | 496.74  | 85      |      |
| 98.106  | 8.2  | 962     | 658  | 601.58  | 100     |      |
| 101.075 | 5.4  | 153     | 741  | 397.03  | 60      |      |
| 112.074 | 16.0 | 3352    | 1023 | 1146.22 | 141     |      |
| 120.075 | 5.8  | 1987    | 918  | 409.81  | 60      |      |
| 129.096 | 14.6 | 8466    | 1081 | 1035.14 | 140     |      |
| 136.038 | 3.4  | 110     | 1131 | 238.72  | 33      |      |
| 143.095 | 13.9 | 18129   | 1244 | 977.68  | 128     |      |
| 154.050 | 10.5 | 1035    | 1228 | 726.87  | 104     |      |
| 158.041 | 9.2  | 2380    | 1281 | 646.56  | 92      |      |
| 169.044 | 6.5  | 4186    | 1177 | 451.00  | 76      |      |
| 171.058 | 4.5  | 55      | 1203 | 312.25  | 52      |      |
| 175.051 | 66.9 | 26654   | 1286 | 4636.53 | 738     |      |
| 181.015 | 3.1  | 39      | 1361 | 216.42  | 34      |      |
| 183.039 | 5.1  | 93      | 1195 | 362.59  | 65      |      |
| 185.043 | 6.4  | 68      | 1215 | 453.24  | 81      |      |
| 191.030 | 6.9  | 152     | 1339 | 487.11  | 82      |      |
| 197.036 | 14.8 | 8338    | 1390 | 1050.60 | 176     |      |
| 201.024 | 3.3  | 34      | 1360 | 237.46  | 42      |      |
| 211.009 | 4.1  | 41      | 1188 | 299.77  | 64      |      |
| 214.044 | 6.3  | 149     | 1166 | 460.22  | 101     |      |
| 218.994 | 16.9 | 12832   | 1280 | 1275.68 | 262     |      |
| 226.983 | 15.4 | 1351    | 1283 | 1196.77 | 255     |      |
| 229.963 | 6.0  | 396     | 1200 | 473.76  | 110     |      |
| 232.030 | 3.7  | 39      | 1336 | 290.51  | 61      |      |
| 243.955 | 15.6 | 1768    | 1261 | 1281.53 | 302     |      |
| 246.009 | 13.4 | 3268    | 1194 | 1110.05 | 279     |      |
| 254.008 | 9.2  | 288     | 1290 | 792.01  | 191     |      |
| 257.993 | 4.8  | 92      | 1299 | 416.42  | 101     |      |
| 262.943 | 3.4  | 54      | 1331 | 305.85  | 74      |      |
| 271.988 | 6.2  | 169     | 1113 | 571.80  | 173     |      |
| 285.976 | 4.1  | 62      | 1254 | 394.64  | 112     |      |
| 288.017 | 4.3  | 50      | 1022 | 411.87  | 145     |      |
| 300.927 | 5.6  | 78      | 1310 | 576.95  | 167     |      |
| 308.040 | 4.7  | 86      | 1260 | 501.06  | 155     |      |
| 311.947 | 4.7  | 103     | 1395 | 504.63  | 143     |      |

| m/z      | S/N  | Quality | Fac. | Res.    | Intens. | Area |
|----------|------|---------|------|---------|---------|------|
| 333.897  | 10.7 | 2453    | 1354 | 1267.78 | 400     |      |
| 342.964  | 5.9  | 88      | 1354 | 732.17  | 239     |      |
| 350.926  | 9.8  | 1369    | 1400 | 1263.72 | 409     |      |
| 355.925  | 10.4 | 242     | 1253 | 1367.98 | 504     |      |
| 359.958  | 4.2  | 76      | 1266 | 562.06  | 208     |      |
| 370.983  | 4.3  | 87      | 1103 | 606.03  | 267     |      |
| 384.937  | 9.7  | 2415    | 1587 | 1423.28 | 455     |      |
| 388.048  | 10.2 | 1945    | 1265 | 1498.54 | 607     |      |
| 390.883  | 4.1  | 127     | 1268 | 609.85  | 249     |      |
| 401.941  | 22.7 | 133935  | 1667 | 3485.68 | 1118    |      |
| 461.864  | 10.5 | 4257    | 1499 | 1886.50 | 799     |      |
| 471.892  | 3.6  | 30      | 1348 | 653.72  | 316     |      |
| 483.910  | 6.2  | 221     | 1687 | 1150.25 | 459     |      |
| 511.898  | 7.2  | 593     | 1724 | 1400.40 | 588     |      |
| 513.896  | 7.2  | 843     | 1789 | 1409.68 | 573     |      |
| 516.998  | 6.6  | 844     | 1639 | 1300.45 | 581     |      |
| 530.882  | 14.0 | 71048   | 1945 | 2798.35 | 1090    |      |
| 554.882  | 3.3  | 64      | 1588 | 677.93  | 343     |      |
| 574.874  | 3.1  | 101     | 1564 | 647.74  | 348     |      |
| 582.854  | 4.7  | 145     | 1696 | 979.99  | 495     |      |
| 600.869  | 5.5  | 458     | 2103 | 1164.30 | 497     |      |
| 689.830  | 3.2  | 97      | 1916 | 687.82  | 389     |      |
| 696.865  | 5.4  | 357     | 1979 | 1162.53 | 646     |      |
| 714.862  | 4.5  | 300     | 2019 | 958.37  | 542     |      |
| 725.923  | 6.4  | 675     | 1780 | 1353.33 | 886     |      |
| 739.848  | 17.6 | 23048   | 2165 | 3690.41 | 2041    |      |
| 742.941  | 7.8  | 1610    | 2130 | 1635.81 | 925     |      |
| 756.858  | 16.2 | 16238   | 2176 | 3361.28 | 1911    |      |
| 810.848  | 5.8  | 240     | 1938 | 1168.31 | 824     |      |
| 813.883  | 8.8  | 2795    | 2244 | 1768.32 | 1083    |      |
| 827.892  | 14.6 | 28802   | 2205 | 2848.40 | 1820    |      |
| 874.808  | 4.2  | 228     | 1990 | 789.58  | 607     |      |
| 910.860  | 4.6  | 95      | 2060 | 855.68  | 675     |      |
| 924.891  | 10.3 | 862     | 2115 | 1890.84 | 1487    |      |
| 927.849  | 24.7 | 7827    | 1926 | 4556.99 | 3955    |      |
| 941.931  | 52.1 | 39009   | 2097 | 9462.53 | 7716    |      |
| 1007.816 | 3.0  | 43      | 2471 | 511.91  | 393     |      |
| 1039.964 | 5.0  | 727     | 2153 | 838.13  | 777     |      |
| 1057.026 | 4.1  | 1120    | 1669 | 687.27  | 843     |      |
| 1283.774 | 9.8  | 1104    | 1495 | 1547.23 | 2950    |      |
| 1298.376 | 21.9 | 37476   | 2020 | 3549.82 | 5111    |      |

| m/z      | S/N   | Quality | Fac. | Res.     | Intens. | Area |
|----------|-------|---------|------|----------|---------|------|
| 1549.468 | 3.6   | 49      | 1722 | 438.38   | 1023    |      |
| 1558.739 | 3.3   | 57      | 1733 | 393.17   | 921     |      |
| 1561.155 | 6.1   | 207     | 2025 | 725.33   | 1458    |      |
| 1564.765 | 4.4   | 190     | 1736 | 507.72   | 1192    |      |
| 1571.892 | 5.6   | 88      | 1744 | 637.08   | 1508    |      |
| 1574.110 | 5.8   | 255     | 1982 | 671.54   | 1403    |      |
| 1578.020 | 5.8   | 369     | 2052 | 656.94   | 1342    |      |
| 1580.233 | 4.0   | 184     | 1974 | 451.43   | 958     |      |
| 1582.181 | 4.8   | 126     | 2378 | 547.18   | 965     |      |
| 1584.441 | 6.6   | 350     | 1977 | 735.45   | 1565    |      |
| 1586.796 | 4.5   | 112     | 1761 | 505.56   | 1208    |      |
| 1589.317 | 5.9   | 206     | 1765 | 631.46   | 1513    |      |
| 1597.663 | 12.7  | 663     | 1774 | 1385.64  | 3336    |      |
| 1600.560 | 3.4   | 72      | 2065 | 374.23   | 775     |      |
| 1617.155 | 27.8  | 3399    | 1796 | 2815.07  | 6851    |      |
| 1620.658 | 6.9   | 220     | 3013 | 700.10   | 1018    |      |
| 1622.919 | 8.0   | 1073    | 3950 | 808.21   | 903     |      |
| 1631.919 | 110.6 | 23519   | 2965 | 10795.23 | 16204   |      |



Comment 1

Comment 2



| m/z      | S/N  | Quality Fac. | Res. | Intens. | Area  |
|----------|------|--------------|------|---------|-------|
| 816.712  | 4.5  | 454          | 1913 | 672.37  | 485   |
| 825.875  | 3.6  | 68           | 2084 | 541.57  | 365   |
| 877.840  | 4.1  | 244          | 1565 | 593.96  | 583   |
| 887.722  | 13.7 | 24233        | 2335 | 1969.24 | 1318  |
| 990.836  | 3.1  | 117          | 1971 | 416.33  | 391   |
| 1090.832 | 5.2  | 142          | 2467 | 693.49  | 609   |
| 1096.795 | 3.5  | 138          | 2435 | 474.00  | 426   |
| 1113.802 | 10.2 | 4859         | 2298 | 1357.47 | 1324  |
| 1219.743 | 3.1  | 113          | 2856 | 416.05  | 380   |
| 1276.817 | 5.1  | 1395         | 2289 | 674.79  | 832   |
| 1332.776 | 3.1  | 194          | 2497 | 409.74  | 500   |
| 1431.684 | 3.2  | 123          | 2909 | 444.57  | 529   |
| 1474.992 | 3.7  | 476          | 2224 | 517.13  | 851   |
| 1532.084 | 26.5 | 20840        | 2108 | 3673.87 | 6844  |
| 1546.821 | 3.2  | 38           | 2620 | 441.91  | 675   |
| 1597.726 | 3.8  | 80           | 2558 | 539.44  | 901   |
| 1774.428 | 4.1  | 478          | 1972 | 553.84  | 1478  |
| 2140.564 | 6.1  | 209          | 2379 | 568.07  | 1637  |
| 2145.668 | 3.6  | 198          | 2382 | 331.28  | 956   |
| 2148.640 | 3.4  | 72           | 2613 | 318.59  | 838   |
| 2151.806 | 4.9  | 99           | 2464 | 451.37  | 1263  |
| 2155.250 | 8.2  | 1082         | 3706 | 772.99  | 1439  |
| 2158.361 | 20.3 | 15675        | 2871 | 1889.69 | 4551  |
| 2165.553 | 6.7  | 216          | 2405 | 582.54  | 1682  |
| 2168.392 | 5.7  | 433          | 2688 | 508.40  | 1315  |
| 2170.956 | 3.1  | 92           | 2820 | 282.84  | 699   |
| 2174.102 | 4.6  | 181          | 2415 | 403.23  | 1165  |
| 2178.610 | 4.7  | 197          | 2421 | 411.88  | 1190  |
| 2182.088 | 3.9  | 105          | 2424 | 335.89  | 971   |
| 2185.266 | 8.8  | 364          | 2425 | 748.40  | 2167  |
| 2190.292 | 6.0  | 170          | 2432 | 520.19  | 1506  |
| 2207.882 | 6.1  | 130          | 2454 | 492.14  | 1432  |
| 2210.288 | 19.4 | 8137         | 2726 | 1619.31 | 4246  |
| 2213.753 | 10.2 | 1696         | 3812 | 860.39  | 1616  |
| 2218.143 | 4.4  | 157          | 6434 | 363.98  | 406   |
| 2222.442 | 6.4  | 644          | 4927 | 527.90  | 772   |
| 2224.719 | 5.4  | 35           | 4640 | 447.36  | 695   |
| 2229.321 | 68.0 | 50838        | 3615 | 5564.42 | 11129 |

Comment 1

Comment 2



| m/z      | S/N   | Quality Fac. | Res. | Intens.  | Area  |
|----------|-------|--------------|------|----------|-------|
| 790.509  | 31.7  | 63576        | 5626 | 5388.92  | 1331  |
| 804.332  | 7.3   | 628          | 4936 | 1246.93  | 349   |
| 808.445  | 16.0  | 11428        | 5560 | 2753.22  | 699   |
| 837.559  | 15.6  | 14589        | 6098 | 2755.55  | 681   |
| 857.505  | 6.6   | 1667         | 5225 | 1179.25  | 345   |
| 930.524  | 13.7  | 6221         | 5839 | 2665.18  | 797   |
| 1006.645 | 6.1   | 488          | 4904 | 1261.25  | 502   |
| 1015.633 | 6.9   | 2270         | 7095 | 1451.76  | 418   |
| 1027.666 | 22.7  | 7210         | 7008 | 4778.47  | 1424  |
| 1142.674 | 14.3  | 6028         | 6169 | 3465.96  | 1354  |
| 1153.655 | 8.0   | 1498         | 5782 | 1960.22  | 830   |
| 1186.730 | 7.5   | 732          | 6058 | 1897.16  | 805   |
| 1197.658 | 8.0   | 365          | 4650 | 2052.49  | 1141  |
| 1219.644 | 10.2  | 1037         | 4037 | 2680.12  | 1782  |
| 1233.716 | 91.1  | 47471        | 6626 | 24270.98 | 10072 |
| 1269.724 | 25.1  | 15834        | 6787 | 6950.25  | 2966  |
| 1326.788 | 46.9  | 20428        | 6885 | 13464.13 | 6106  |
| 1368.830 | 6.5   | 1074         | 6642 | 1927.21  | 949   |
| 1380.867 | 6.6   | 544          | 5868 | 1965.26  | 1112  |
| 1428.921 | 11.7  | 3694         | 6251 | 3575.18  | 2029  |
| 1475.873 | 55.4  | 26434        | 7013 | 17148.72 | 9244  |
| 1477.849 | 24.6  | 10362        | 6550 | 7606.92  | 4367  |
| 1575.015 | 16.3  | 13125        | 7540 | 5133.41  | 2871  |
| 1598.984 | 19.1  | 10641        | 7281 | 5995.02  | 3642  |
| 1617.928 | 52.3  | 45964        | 7184 | 16354.19 | 10267 |
| 1631.946 | 72.9  | 62393        | 7498 | 22703.40 | 13937 |
| 1712.968 | 16.1  | 15133        | 7709 | 4863.80  | 3209  |
| 1729.003 | 10.2  | 5440         | 8430 | 3078.01  | 1867  |
| 1756.087 | 14.0  | 4531         | 7242 | 4146.67  | 3028  |
| 1781.094 | 9.6   | 810          | 5375 | 2838.58  | 2853  |
| 1797.115 | 11.7  | 7277         | 7642 | 3420.05  | 2497  |
| 1804.058 | 59.3  | 69867        | 7902 | 17300.11 | 12317 |
| 1915.149 | 16.0  | 7863         | 7463 | 4232.01  | 3479  |
| 1947.142 | 12.1  | 581          | 6974 | 3069.99  | 2721  |
| 1949.132 | 32.9  | 16438        | 7609 | 8314.25  | 6919  |
| 1952.152 | 8.2   | 901          | 4978 | 2071.61  | 2588  |
| 1966.198 | 177.6 | 30339        | 7372 | 44013.54 | 38141 |
| 2005.247 | 23.9  | 21912        | 7703 | 5639.58  | 4778  |

---

| m/z      | S/N  | Quality | Fac. | Res.    | Intens. | Area |
|----------|------|---------|------|---------|---------|------|
| 2117.360 | 14.3 | 4351    | 7444 | 2809.44 | 2628    |      |
| 2211.316 | 16.0 | 1493    | 7705 | 2721.93 | 2600    |      |
| 2229.330 | 56.5 | 7475    | 7739 | 9375.13 | 9076    |      |
| 2271.365 | 8.9  | 3328    | 7604 | 1386.29 | 1393    |      |
| 2438.486 | 6.1  | 925     | 6541 | 699.07  | 896     |      |
| 2856.608 | 6.5  | 4103    | 8169 | 361.51  | 476     |      |
| 3284.688 | 16.3 | 4338    | 8332 | 411.68  | 680     |      |

**MATRIX SCIENCE Mascot Search Results**

User : Madhurarekha  
 Email : sanovar@sandor.co.in  
 Search title :  
 MS data file : DATA.TXT  
 Database : SwissProt 2018\_06 (557713 sequences; 200130199 residues)  
 Taxonomy : Bacteria (Eubacteria) (333552 sequences)  
 Timestamp : 11 Jul 2018 at 11:45:45 GMT  
 Warning : **A Peptide summary report will usually give a much clearer picture of MS/MS search results.**  
 Top Score : 123 for **EFTU\_KLEP7**, Elongation factor Tu OS=Klebsiella pneumoniae subsp. pneumoniae (strain ATCC 700721 / MGH 78578)

**Mascot Score Histogram**

Protein score is  $-10 \cdot \log(P)$ , where P is the probability that the observed match is a random event.  
 Protein scores greater than 68 are significant ( $p < 0.05$ ).  
 Protein scores are derived from ions scores as a non-probabilistic basis for ranking protein hits.

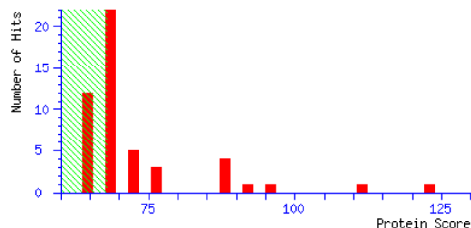

**Protein Summary Report**

Format As  [Help](#)  
 Significance threshold  $p <$   Max. number of hits   
 Preferred taxonomy

**Overview Table**

Click on column header to jump to entry in results list.  
 Move mouse over any indicator to highlight identical peptides.  
 Click on an indicator to see details of individual match.  
 Use check boxes to select sub-set of queries for new search.

Mouse over:

| Hit:                                                               | 1 | 2 | 3 | 4 | 5 | 6 | 7 | 8 | 9 | 10 | 11 | 12 | 13 | 14 | 15 | 16 | 17 | 18 | 19 | 20 |
|--------------------------------------------------------------------|---|---|---|---|---|---|---|---|---|----|----|----|----|----|----|----|----|----|----|----|
| <input checked="" type="checkbox"/> <a href="#">790.5086</a> (1+)  |   |   |   |   |   |   |   |   |   |    |    |    |    |    |    |    |    |    |    |    |
| <input checked="" type="checkbox"/> <a href="#">804.3324</a> (1+)  |   |   |   |   |   |   |   |   |   |    |    |    |    |    |    |    |    |    |    |    |
| <input checked="" type="checkbox"/> <a href="#">808.4445</a> (1+)  |   |   |   |   |   |   |   |   |   |    |    |    |    |    |    |    |    |    |    |    |
| <input checked="" type="checkbox"/> <a href="#">817.4935</a> (1+)  |   |   |   |   |   |   |   |   |   |    |    |    |    |    |    |    |    |    |    |    |
| <input checked="" type="checkbox"/> <a href="#">832.4057</a> (1+)  |   |   |   |   |   |   |   |   |   |    |    |    |    |    |    |    |    |    |    |    |
| <input checked="" type="checkbox"/> <a href="#">837.5595</a> (1+)  |   |   |   |   |   |   |   |   |   |    |    |    |    |    |    |    |    |    |    |    |
| <input checked="" type="checkbox"/> <a href="#">842.5625</a> (1+)  |   |   |   |   |   |   |   |   |   |    |    |    |    |    |    |    |    |    |    |    |
| <input checked="" type="checkbox"/> <a href="#">857.5055</a> (1+)  |   |   |   |   |   |   |   |   |   |    |    |    |    |    |    |    |    |    |    |    |
| <input checked="" type="checkbox"/> <a href="#">930.5245</a> (1+)  |   |   |   |   |   |   |   |   |   |    |    |    |    |    |    |    |    |    |    |    |
| <input checked="" type="checkbox"/> <a href="#">964.5936</a> (1+)  |   |   |   |   |   |   |   |   |   |    |    |    |    |    |    |    |    |    |    |    |
| <input checked="" type="checkbox"/> <a href="#">982.6070</a> (1+)  |   |   |   |   |   |   |   |   |   |    |    |    |    |    |    |    |    |    |    |    |
| <input checked="" type="checkbox"/> <a href="#">986.6133</a> (1+)  |   |   |   |   |   |   |   |   |   |    |    |    |    |    |    |    |    |    |    |    |
| <input checked="" type="checkbox"/> <a href="#">1006.6445</a> (1+) |   |   |   |   |   |   |   |   |   |    |    |    |    |    |    |    |    |    |    |    |
| <input checked="" type="checkbox"/> <a href="#">1015.6326</a> (1+) |   |   |   |   |   |   |   |   |   |    |    |    |    |    |    |    |    |    |    |    |
| <input checked="" type="checkbox"/> <a href="#">1027.6664</a> (1+) |   |   |   |   |   |   |   |   |   |    |    |    |    |    |    |    |    |    |    |    |
| <input checked="" type="checkbox"/> <a href="#">1042.6300</a> (1+) |   |   |   |   |   |   |   |   |   |    |    |    |    |    |    |    |    |    |    |    |
| <input checked="" type="checkbox"/> <a href="#">1078.6445</a> (1+) |   |   |   |   |   |   |   |   |   |    |    |    |    |    |    |    |    |    |    |    |
| <input checked="" type="checkbox"/> <a href="#">1107.8344</a> (1+) |   |   |   |   |   |   |   |   |   |    |    |    |    |    |    |    |    |    |    |    |
| <input checked="" type="checkbox"/> <a href="#">1142.6742</a> (1+) |   |   |   |   |   |   |   |   |   |    |    |    |    |    |    |    |    |    |    |    |
| <input checked="" type="checkbox"/> <a href="#">1153.6546</a> (1+) |   |   |   |   |   |   |   |   |   |    |    |    |    |    |    |    |    |    |    |    |
| <input checked="" type="checkbox"/> <a href="#">1165.6966</a> (1+) |   |   |   |   |   |   |   |   |   |    |    |    |    |    |    |    |    |    |    |    |
| <input checked="" type="checkbox"/> <a href="#">1179.7073</a> (1+) |   |   |   |   |   |   |   |   |   |    |    |    |    |    |    |    |    |    |    |    |
| <input checked="" type="checkbox"/> <a href="#">1186.7303</a> (1+) |   |   |   |   |   |   |   |   |   |    |    |    |    |    |    |    |    |    |    |    |
| <input checked="" type="checkbox"/> <a href="#">1197.6582</a> (1+) |   |   |   |   |   |   |   |   |   |    |    |    |    |    |    |    |    |    |    |    |
| <input checked="" type="checkbox"/> <a href="#">1214.7097</a> (1+) |   |   |   |   |   |   |   |   |   |    |    |    |    |    |    |    |    |    |    |    |
| <input checked="" type="checkbox"/> <a href="#">1219.6443</a> (1+) |   |   |   |   |   |   |   |   |   |    |    |    |    |    |    |    |    |    |    |    |
| <input checked="" type="checkbox"/> <a href="#">1233.7159</a> (1+) |   |   |   |   |   |   |   |   |   |    |    |    |    |    |    |    |    |    |    |    |
| <input checked="" type="checkbox"/> <a href="#">1240.6944</a> (1+) |   |   |   |   |   |   |   |   |   |    |    |    |    |    |    |    |    |    |    |    |
| <input checked="" type="checkbox"/> <a href="#">1265.7392</a> (1+) |   |   |   |   |   |   |   |   |   |    |    |    |    |    |    |    |    |    |    |    |
| <input checked="" type="checkbox"/> <a href="#">1269.7243</a> (1+) |   |   |   |   |   |   |   |   |   |    |    |    |    |    |    |    |    |    |    |    |





2717.3922 2716.3849 2716.3305 20.0 334 - 356 0 --- K.DDLLEVAMELEHIALNDPYFIEK.K

No match to: 804.3324, 832.4057, 837.5595, 842.5625, 857.5055, 930.5245, 964.5936, 982.6070, 986.6133, 1006.6445, 1027.6664, 1042.6300, 1078.6445, 1107.8344, 1142.6742, 1153.6546, 1165.6966, 1179.7073, 1197.6582, 1214.7097, 1233.7159, 1240.6944, 1269.7243, 1368.8298, 1380.8667, 1428.9212, 1450.8531, 1475.8727, 1479.8489, 1484.8980, 1530.8700, 1557.9283, 1575.0154, 1617.9280, 1654.9735, 1708.0185, 1712.9684, 1724.0543, 1729.0035, 1733.0874, 1756.0868, 1781.0936, 1797.1145, 1804.0575, 1813.1035, 1839.0932, 1850.0717, 1882.1314, 1900.1334, 1915.1486, 1931.1352, 1947.1417, 1949.1320, 1952.1522, 1966.1980, 1981.1803, 1994.1847, 2021.1854, 2042.2539, 2044.2373, 2064.3065, 2117.3601, 2149.2508, 2181.2406, 2211.3162, 2215.2391, 2229.3298, 2271.3649, 2284.3753, 2384.2549, 2399.3191, 2438.4857, 2450.5041, 2498.5023, 2615.5335, 2645.5873, 2681.5950, 2705.4362, 2729.6061, 2745.6012, 2808.6023, 2856.6076, 2872.6380, 3048.6449, 3284.6878

4. EFTU\_AERHH Mass: 43525 Score: 94 Expect: 0.00015 Matches: 7

Elongation factor Tu OS=Aeromonas hydrophila subsp. hydrophila (strain ATCC 7966 / DSM 30187 / JCM 1027 / KCTC 2358 / NCIMB 9240)

| Observed  | Mr (expt) | Mr (calc) | ppm  | Start | End   | Miss | Ions | Peptide                                         |
|-----------|-----------|-----------|------|-------|-------|------|------|-------------------------------------------------|
| 837.5595  | 836.5522  | 836.4868  | 78.2 | 118   | - 124 | 0    | ---  | R.EHILLGR.Q                                     |
| 1233.7159 | 1232.7086 | 1232.6091 | 80.8 | 326   | - 334 | 0    | 10   | K.GYRPFYFR.T                                    |
| 1575.0154 | 1574.0081 | 1573.9304 | 49.4 | 290   | - 304 | 0    | ---  | R.GQVLAKPGTIKPHTK.F                             |
| 1729.0035 | 1727.9962 | 1727.8366 | 92.4 | 305   | - 319 | 1    | ---  | K.FESEVYVLSKEGGR.H                              |
| 1966.1980 | 1965.1907 | 1965.0207 | 86.5 | 189   | - 205 | 0    | 64   | K.ILELAGHLDTIPEPER.A                            |
| 2729.6061 | 2728.5988 | 2728.3346 | 96.8 | 91    | - 117 | 0    | ---  | K.NMITGAAQMDGAILVVAATDGFMPQTR.E                 |
| 2745.6012 | 2744.5939 | 2744.3296 | 96.3 | 91    | - 117 | 0    | ---  | K.NMITGAAQMDGAILVVAATDGFMPQTR.E + Oxidation (M) |

No match to: 790.5086, 804.3324, 808.4445, 817.4935, 832.4057, 842.5625, 857.5055, 930.5245, 964.5936, 982.6070, 986.6133, 1006.6445, 1015.6326, 1027.6664, 1042.6300, 1078.6445, 1107.8344, 1142.6742, 1153.6546, 1165.6966, 1179.7073, 1186.7303, 1197.6582, 1214.7097, 1219.6443, 1240.6944, 1265.7392, 1269.7243, 1326.7883, 1368.8298, 1380.8667, 1428.9212, 1450.8531, 1475.8727, 1477.8489, 1484.8980, 1530.8700, 1557.9283, 1598.9839, 1617.9280, 1631.9464, 1654.9735, 1658.9825, 1708.0185, 1712.9684, 1724.0543, 1733.0874, 1756.0868, 1781.0936, 1797.1145, 1804.0575, 1813.1035, 1824.0974, 1839.0932, 1850.0717, 1882.1314, 1900.1334, 1915.1486, 1931.1352, 1938.1476, 1947.1417, 1949.1320, 1952.1522, 1981.1803, 1994.1847, 2005.2465, 2021.1854, 2042.2539, 2044.2373, 2064.3065, 2117.3601, 2149.2508, 2181.2406, 2211.3162, 2215.2391, 2229.3298, 2271.3649, 2284.3753, 2384.2549, 2399.3191, 2438.4857, 2450.5041, 2498.5023, 2615.5335, 2645.5873, 2681.5950, 2705.4362, 2717.3922, 2808.6023, 2856.6076, 2872.6380, 3048.6449, 3284.6878

5. EFTU\_COXBN Mass: 43613 Score: 88 Expect: 0.00058 Matches: 8

Elongation factor Tu OS=Coxiella burnetii (strain Dugway 5J108-111) OX=434922 GN=tuf1 PE=3 SV=1

| Observed  | Mr (expt) | Mr (calc) | ppm  | Start | End   | Miss | Ions | Peptide                              |
|-----------|-----------|-----------|------|-------|-------|------|------|--------------------------------------|
| 817.4935  | 816.4862  | 816.4090  | 94.6 | 286   | - 291 | 1    | ---  | K.REEVER.G                           |
| 1186.7303 | 1185.7230 | 1185.6969 | 22.0 | 386   | - 397 | 1    | ---  | R.TVGAGVVTKIIE.-                     |
| 1326.7883 | 1325.7810 | 1325.7231 | 43.7 | 306   | - 316 | 1    | ---  | K.KFEAEIYVLSK.E                      |
| 1475.8727 | 1474.8655 | 1474.8606 | 3.26 | 26    | - 39  | 1    | 5    | K.TTLTAALTKVLSK.Y                    |
| 1631.9464 | 1630.9392 | 1630.7699 | 104  | 46    | - 59  | 1    | 63   | K.AFDQIDNAPERAR.G                    |
| 1712.9684 | 1711.9611 | 1711.9178 | 25.3 | 362   | - 377 | 0    | ---  | K.VTVELIAPVAMDEGLR.F                 |
| 1729.0035 | 1727.9962 | 1727.9128 | 48.3 | 362   | - 377 | 0    | ---  | K.VTVELIAPVAMDEGLR.F + Oxidation (M) |
| 1824.0974 | 1823.0901 | 1822.9438 | 80.2 | 9     | - 25  | 0    | ---  | R.EKPHVNVGTIGHVDHGK.T                |

No match to: 790.5086, 804.3324, 808.4445, 832.4057, 837.5595, 842.5625, 857.5055, 930.5245, 964.5936, 982.6070, 986.6133, 1006.6445, 1015.6326, 1027.6664, 1042.6300, 1078.6445, 1107.8344, 1142.6742, 1153.6546, 1165.6966, 1179.7073, 1197.6582, 1214.7097, 1219.6443, 1233.7159, 1240.6944, 1265.7392, 1269.7243, 1368.8298, 1380.8667, 1428.9212, 1450.8531, 1477.8489, 1484.8980, 1530.8700, 1557.9283, 1575.0154, 1598.9839, 1617.9280, 1654.9735, 1658.9825, 1708.0185, 1724.0543, 1733.0874, 1756.0868, 1781.0936, 1797.1145, 1804.0575, 1813.1035, 1839.0932, 1850.0717, 1882.1314, 1900.1334, 1915.1486, 1931.1352, 1938.1476, 1947.1417, 1949.1320, 1952.1522, 1966.1980, 1981.1803, 1994.1847, 2005.2465, 2021.1854, 2042.2539, 2044.2373, 2064.3065, 2117.3601, 2149.2508, 2181.2406, 2211.3162, 2215.2391, 2229.3298, 2271.3649, 2284.3753, 2384.2549, 2399.3191, 2438.4857, 2450.5041, 2498.5023, 2615.5335, 2645.5873, 2681.5950, 2705.4362, 2717.3922, 2729.6061, 2745.6012, 2808.6023, 2856.6076, 2872.6380, 3048.6449, 3284.6878

6. EFTU\_COXBR Mass: 43613 Score: 88 Expect: 0.00058 Matches: 8

Elongation factor Tu OS=Coxiella burnetii (strain RSA 331 / Henzerling II) OX=360115 GN=tuf1 PE=3 SV=1

| Observed  | Mr (expt) | Mr (calc) | ppm  | Start | End   | Miss | Ions | Peptide                              |
|-----------|-----------|-----------|------|-------|-------|------|------|--------------------------------------|
| 817.4935  | 816.4862  | 816.4090  | 94.6 | 286   | - 291 | 1    | ---  | K.REEVER.G                           |
| 1186.7303 | 1185.7230 | 1185.6969 | 22.0 | 386   | - 397 | 1    | ---  | R.TVGAGVVTKIIE.-                     |
| 1326.7883 | 1325.7810 | 1325.7231 | 43.7 | 306   | - 316 | 1    | ---  | K.KFEAEIYVLSK.E                      |
| 1475.8727 | 1474.8655 | 1474.8606 | 3.26 | 26    | - 39  | 1    | 5    | K.TTLTAALTKVLSK.Y                    |
| 1631.9464 | 1630.9392 | 1630.7699 | 104  | 46    | - 59  | 1    | 63   | K.AFDQIDNAPERAR.G                    |
| 1712.9684 | 1711.9611 | 1711.9178 | 25.3 | 362   | - 377 | 0    | ---  | K.VTVELIAPVAMDEGLR.F                 |
| 1729.0035 | 1727.9962 | 1727.9128 | 48.3 | 362   | - 377 | 0    | ---  | K.VTVELIAPVAMDEGLR.F + Oxidation (M) |
| 1824.0974 | 1823.0901 | 1822.9438 | 80.2 | 9     | - 25  | 0    | ---  | R.EKPHVNVGTIGHVDHGK.T                |

No match to: 790.5086, 804.3324, 808.4445, 832.4057, 837.5595, 842.5625, 857.5055, 930.5245, 964.5936, 982.6070, 986.6133, 1006.6445, 1015.6326, 1027.6664, 1042.6300, 1078.6445, 1107.8344, 1142.6742, 1153.6546, 1165.6966, 1179.7073, 1197.6582, 1214.7097, 1219.6443, 1233.7159, 1240.6944, 1265.7392, 1269.7243, 1368.8298, 1380.8667, 1428.9212, 1450.8531, 1477.8489, 1484.8980, 1530.8700, 1557.9283, 1575.0154, 1598.9839, 1617.9280, 1654.9735, 1658.9825, 1708.0185, 1724.0543, 1733.0874, 1756.0868, 1781.0936, 1797.1145, 1804.0575, 1813.1035, 1839.0932, 1850.0717, 1882.1314, 1900.1334, 1915.1486, 1931.1352, 1938.1476, 1947.1417, 1949.1320, 1952.1522, 1966.1980, 1981.1803, 1994.1847, 2005.2465, 2021.1854, 2042.2539, 2044.2373, 2064.3065, 2117.3601, 2149.2508, 2181.2406, 2211.3162, 2215.2391, 2229.3298, 2271.3649, 2284.3753, 2384.2549, 2399.3191, 2438.4857, 2450.5041, 2498.5023, 2615.5335, 2645.5873, 2681.5950, 2705.4362, 2717.3922, 2729.6061, 2745.6012, 2808.6023, 2856.6076, 2872.6380, 3048.6449, 3284.6878

7. EFTU\_COXBU Mass: 43613 Score: 88 Expect: 0.00058 Matches: 8

Elongation factor Tu OS=Coxiella burnetii (strain RSA 493 / Nine Mile phase I) OX=227377 GN=tufA PE=1 SV=1

| Observed  | Mr (expt) | Mr (calc) | ppm  | Start | End   | Miss | Ions | Peptide                              |
|-----------|-----------|-----------|------|-------|-------|------|------|--------------------------------------|
| 817.4935  | 816.4862  | 816.4090  | 94.6 | 286   | - 291 | 1    | ---  | K.REEVER.G                           |
| 1186.7303 | 1185.7230 | 1185.6969 | 22.0 | 386   | - 397 | 1    | ---  | R.TVGAGVVTKIIE.-                     |
| 1326.7883 | 1325.7810 | 1325.7231 | 43.7 | 306   | - 316 | 1    | ---  | K.KFEAEIYVLSK.E                      |
| 1475.8727 | 1474.8655 | 1474.8606 | 3.26 | 26    | - 39  | 1    | 5    | K.TTLTAALTKVLSK.Y                    |
| 1631.9464 | 1630.9392 | 1630.7699 | 104  | 46    | - 59  | 1    | 63   | K.AFDQIDNAPERAR.G                    |
| 1712.9684 | 1711.9611 | 1711.9178 | 25.3 | 362   | - 377 | 0    | ---  | K.VTVELIAPVAMDEGLR.F                 |
| 1729.0035 | 1727.9962 | 1727.9128 | 48.3 | 362   | - 377 | 0    | ---  | K.VTVELIAPVAMDEGLR.F + Oxidation (M) |
| 1824.0974 | 1823.0901 | 1822.9438 | 80.2 | 9     | - 25  | 0    | ---  | R.EKPHVNVGTIGHVDHGK.T                |

No match to: 790.5086, 804.3324, 808.4445, 832.4057, 837.5595, 842.5625, 857.5055, 930.5245, 964.5936, 982.6070, 986.6133, 1006.6445, 1015.6326, 1027.6664, 1042.6300, 1078.6445, 1107.8344, 1142.6742, 1153.6546, 1165.6966, 1179.7073, 1197.6582, 1214.7097, 1219.6443, 1233.7159, 1240.6944, 1265.7392, 1269.7243, 1368.8298, 1380.8667, 1428.9212, 1450.8531, 1477.8489, 1484.8980, 1530.8700, 1557.9283, 1575.0154, 1598.9839, 1617.9280, 1654.9735, 1658.9825, 1708.0185, 1724.0543, 1733.0874, 1756.0868, 1781.0936, 1797.1145, 1804.0575, 1813.1035, 1839.0932, 1850.0717, 1882.1314, 1900.1334, 1915.1486, 1931.1352, 1938.1476, 1947.1417, 1949.1320, 1952.1522, 1966.1980, 1981.1803, 1994.1847, 2005.2465, 2021.1854, 2042.2539, 2044.2373, 2064.3065, 2117.3601, 2149.2508, 2181.2406, 2211.3162, 2215.2391, 2229.3298, 2271.3649, 2284.3753, 2384.2549, 2399.3191, 2438.4857, 2450.5041, 2498.5023, 2615.5335, 2645.5873, 2681.5950, 2705.4362, 2717.3922, 2729.6061, 2745.6012, 2808.6023, 2856.6076, 2872.6380, 3048.6449, 3284.6878

8. EFTU\_MARHV Mass: 44034 Score: 87 Expect: 0.00071 Matches: 5

Elongation factor Tu OS=Marinobacter hydrocarbonoclasticus (strain ATCC 700491 / DSM 11845 / VT8) OX=351348 GN=tuf PE=3 SV=1

| Observed | Mr (expt) | Mr (calc) | ppm | Start | End | Miss | Ions | Peptide |
|----------|-----------|-----------|-----|-------|-----|------|------|---------|
|----------|-----------|-----------|-----|-------|-----|------|------|---------|



1027.6664 1026.6591 1026.5822 74.9 275 - 284 0 --- R.AGENVGVLLR.G  
 1233.7159 1232.7086 1232.6091 80.8 330 - 338 0 10 K.GYRPQFYFR.T  
 1631.9464 1630.9392 1630.7699 104 47 - 60 1 63 R.AFDQIDNAPERAR.G  
 1658.9825 1657.9752 1657.8199 93.7 196 - 209 0 --- K.LVEALDDYIPEPER.A  
 2808.6023 2807.5950 2807.2711 115 92 - 118 0 --- K.NMITGAAQMDGAILVCSAADGPMPTRE + 2 Oxidation (M)  
**No match to:** 790.5086, 804.3324, 808.4445, 817.4935, 832.4057, 837.5595, 842.5625, 857.5055, 930.5245, 964.5936, 982.6070, 986.6133, 1006.6445, 1015.6326, 1042.6300, 1078.6445, 1107.8344, 1142.6742, 1153.6546, 1165.6966, 1179.7073, 1186.7303, 1197.6582, 1214.7097, 1219.6443, 1240.6944, 1265.7392, 1269.7243, 1326.7883, 1368.8298, 1380.8667, 1428.9212, 1450.8531, 1475.8727, 1477.8489, 1484.8980, 1530.8700, 1557.9283, 1575.0154, 1598.9839, 1617.9280, 1654.9735, 1708.0185, 1712.9684, 1724.0543, 1729.0035, 1733.0874, 1756.0868, 1781.0936, 1797.1145, 1804.0575, 1813.1035, 1824.0974, 1839.0932, 1850.0717, 1882.1314, 1900.1334, 1915.1486, 1931.1352, 1938.1476, 1947.1417, 1949.1320, 1952.1522, 1966.1980, 1981.1803, 1994.1847, 2005.2465, 2021.1854, 2042.2539, 2044.2373, 2064.3065, 2117.3601, 2149.2508, 2181.2406, 2211.3162, 2215.2391, 2229.3298, 2271.3649, 2284.3753, 2384.2549, 2399.3191, 2438.4857, 2450.5041, 2498.5023, 2615.5335, 2645.5873, 2681.5950, 2705.4362, 2717.3922, 2729.6061, 2745.6012, 2856.6076, 2872.6380, 3048.6449, 3284.6878

9. [DNAK\\_BRADU](#) Mass: 68364 Score: 76 Expect: 0.0076 Matches: 7  
 Chaperone protein DnaK OS=Bradyrhizobium diazoefficiens (strain JCM 10833 / IAM 13628 / NBRC 14792 / USDA 110) OX=224911 GN=dnaK

| Observed  | Mr(expt)  | Mr(calc)  | ppm  | Start | End   | Miss | Ions | Peptide                                     |
|-----------|-----------|-----------|------|-------|-------|------|------|---------------------------------------------|
| 1015.6326 | 1014.6253 | 1014.5644 | 60.0 | 290   | - 297 | 1    | ---  | K.HLTMKLTR.A + Oxidation (M)                |
| 1078.6445 | 1077.6372 | 1077.5488 | 82.0 | 583   | - 592 | 0    | ---  | K.TQTLAQSMK.L                               |
| 1186.7303 | 1185.7230 | 1185.6102 | 95.2 | 242   | - 251 | 1    | ---  | K.EGQINLNRDK.L                              |
| 1658.9825 | 1657.9752 | 1657.8320 | 86.4 | 448   | - 462 | 0    | ---  | K.MLGQFDLMGIPPAPR.G + Oxidation (M)         |
| 1966.1980 | 1965.1907 | 1964.9547 | 120  | 4     | - 22  | 0    | 36   | K.VIGIDLGTNSCAVMDGK.N + Oxidation (M)       |
| 2229.3298 | 2228.3225 | 2228.1835 | 62.4 | 318   | - 340 | 1    | 25   | K.ALKADAGVTAGEIGEVVVLGGMSR.M                |
| 2450.5041 | 2449.4968 | 2449.1440 | 144  | 441   | - 462 | 1    | ---  | R.EMAADNMLGQFDLMGIPPAPR.G + 3 Oxidation (M) |

**No match to:** 790.5086, 804.3324, 808.4445, 817.4935, 832.4057, 837.5595, 842.5625, 857.5055, 930.5245, 964.5936, 982.6070, 986.6133, 1006.6445, 1015.6326, 1027.6664, 1042.6300, 1107.8344, 1142.6742, 1153.6546, 1165.6966, 1179.7073, 1197.6582, 1214.7097, 1219.6443, 1233.7159, 1240.6944, 1265.7392, 1269.7243, 1326.7883, 1368.8298, 1380.8667, 1428.9212, 1450.8531, 1475.8727, 1477.8489, 1484.8980, 1530.8700, 1557.9283, 1575.0154, 1598.9839, 1617.9280, 1631.9464, 1654.9735, 1708.0185, 1712.9684, 1724.0543, 1729.0035, 1733.0874, 1756.0868, 1781.0936, 1797.1145, 1804.0575, 1813.1035, 1824.0974, 1839.0932, 1850.0717, 1882.1314, 1900.1334, 1915.1486, 1931.1352, 1938.1476, 1947.1417, 1949.1320, 1952.1522, 1981.1803, 1994.1847, 2005.2465, 2021.1854, 2042.2539, 2044.2373, 2064.3065, 2117.3601, 2149.2508, 2181.2406, 2211.3162, 2215.2391, 2271.3649, 2284.3753, 2384.2549, 2399.3191, 2438.4857, 2498.5023, 2615.5335, 2645.5873, 2681.5950, 2705.4362, 2717.3922, 2729.6061, 2745.6012, 2808.6023, 2856.6076, 2872.6380, 3048.6449, 3284.6878

10. [ADH\\_THEBR](#) Mass: 37851 Score: 75 Expect: 0.0096 Matches: 7  
 NADP-dependent isopropanol dehydrogenase OS=Thermoanaerobacter brockii OX=29323 GN=adh PE=1 SV=1

| Observed  | Mr(expt)  | Mr(calc)  | ppm  | Start | End   | Miss | Ions | Peptide                          |
|-----------|-----------|-----------|------|-------|-------|------|------|----------------------------------|
| 1042.6300 | 1041.6227 | 1041.5502 | 69.7 | 292   | - 301 | 1    | ---  | K.GGLCPGGRLR.M                   |
| 1214.7097 | 1213.7024 | 1213.6199 | 68.0 | 1     | - 11  | 1    | ---  | -MKGFAMLSIGK.V + 2 Oxidation (M) |
| 1240.6944 | 1239.6871 | 1239.6355 | 41.6 | 333   | - 342 | 1    | ---  | K.AFMLMKDKPK.D + 2 Oxidation (M) |
| 1530.8700 | 1529.8628 | 1529.7483 | 74.8 | 279   | - 291 | 1    | ---  | R.LEWCGCMHKHTK.G                 |
| 1631.9464 | 1630.9392 | 1630.7872 | 93.2 | 220   | - 234 | 0    | 48   | K.DGPISQIMNLTGK.G                |
| 2229.3298 | 2228.3225 | 2228.0545 | 120  | 92    | - 111 | 1    | ---  | R.TSEVQRGYHQHSGMLAGWK.F          |
| 3048.6449 | 3047.6376 | 3047.5135 | 40.7 | 53    | - 80  | 1    | ---  | R.HNMILGHEAVGVVEVGSEVKDFKPGDR.V  |

**No match to:** 790.5086, 804.3324, 808.4445, 817.4935, 832.4057, 837.5595, 842.5625, 857.5055, 930.5245, 964.5936, 982.6070, 986.6133, 1006.6445, 1015.6326, 1027.6664, 1078.6445, 1107.8344, 1142.6742, 1153.6546, 1165.6966, 1179.7073, 1186.7303, 1197.6582, 1214.7097, 1219.6443, 1233.7159, 1240.6944, 1265.7392, 1269.7243, 1326.7883, 1368.8298, 1380.8667, 1428.9212, 1450.8531, 1475.8727, 1477.8489, 1484.8980, 1557.9283, 1575.0154, 1598.9839, 1617.9280, 1654.9735, 1658.9825, 1708.0185, 1712.9684, 1724.0543, 1729.0035, 1733.0874, 1756.0868, 1781.0936, 1797.1145, 1804.0575, 1813.1035, 1824.0974, 1839.0932, 1850.0717, 1882.1314, 1900.1334, 1915.1486, 1931.1352, 1938.1476, 1947.1417, 1949.1320, 1952.1522, 1966.1980, 1981.1803, 1994.1847, 2005.2465, 2021.1854, 2042.2539, 2044.2373, 2064.3065, 2117.3601, 2149.2508, 2181.2406, 2211.3162, 2215.2391, 2271.3649, 2284.3753, 2384.2549, 2399.3191, 2438.4857, 2450.5041, 2498.5023, 2615.5335, 2645.5873, 2681.5950, 2705.4362, 2717.3922, 2729.6061, 2745.6012, 2808.6023, 2856.6076, 2872.6380, 3048.6449, 3284.6878

11. [TOP1\\_STAS1](#) Mass: 79764 Score: 75 Expect: 0.01 Matches: 12  
 DNA topoisomerase I OS=Staphylococcus saprophyticus subsp. saprophyticus (strain ATCC 15305 / DSM 20229) OX=342451 GN=topA PE=3

| Observed  | Mr(expt)  | Mr(calc)  | ppm   | Start | End   | Miss | Ions | Peptide                            |
|-----------|-----------|-----------|-------|-------|-------|------|------|------------------------------------|
| 1006.6445 | 1005.6372 | 1005.5607 | 76.1  | 401   | - 409 | 1    | ---  | R.ANGQTIKFK.G                      |
| 1186.7303 | 1185.7230 | 1185.6003 | 104   | 358   | - 366 | 1    | ---  | K.NFLTRDQHR.L                      |
| 1240.6944 | 1239.6871 | 1239.5924 | 76.4  | 184   | - 192 | 0    | ---  | R.NFKPEEYWK.I                      |
| 1269.7243 | 1268.7171 | 1268.6976 | 15.4  | 2     | - 13  | 0    | ---  | M.AENLVIVESPAK.A                   |
| 1368.8298 | 1367.8225 | 1367.8249 | -1.72 | 167   | - 178 | 1    | ---  | R.VQSVLRVIDR.E                     |
| 1450.8531 | 1449.8459 | 1449.7874 | 40.3  | 27    | - 39  | 1    | ---  | K.VIASMGHVRDLPR.S                  |
| 1475.8727 | 1474.8655 | 1474.7086 | 106   | 127   | - 139 | 0    | 26   | R.GIEMELVDAQQAR.R + Oxidation (M)  |
| 1631.9464 | 1630.9392 | 1630.8097 | 79.4  | 127   | - 140 | 1    | 29   | R.GIEMELVDAQQARR.I + Oxidation (M) |
| 1850.0717 | 1849.0644 | 1848.9264 | 74.6  | 124   | - 139 | 1    | ---  | K.HPRGIEMELVDAQQAR.R               |
| 1882.1314 | 1881.1241 | 1880.9740 | 79.8  | 274   | - 289 | 1    | ---  | K.TMMLAQQLYEGIDLKK.Q               |
| 1938.1476 | 1937.1403 | 1936.9351 | 106   | 334   | - 351 | 0    | ---  | K.GGQQDAHEAIRPSSTLR.T              |
| 2229.3298 | 2228.3225 | 2228.0419 | 126   | 40    | - 58  | 1    | ---  | R.SQMVGDAENDYEPKYIITIR.G           |

**No match to:** 790.5086, 804.3324, 808.4445, 817.4935, 832.4057, 837.5595, 842.5625, 857.5055, 930.5245, 964.5936, 982.6070, 986.6133, 1015.6326, 1027.6664, 1042.6300, 1078.6445, 1107.8344, 1142.6742, 1153.6546, 1165.6966, 1179.7073, 1197.6582, 1214.7097, 1219.6443, 1233.7159, 1265.7392, 1326.7883, 1380.8667, 1428.9212, 1477.8489, 1484.8980, 1530.8700, 1557.9283, 1575.0154, 1598.9839, 1617.9280, 1654.9735, 1658.9825, 1708.0185, 1712.9684, 1724.0543, 1729.0035, 1733.0874, 1756.0868, 1781.0936, 1797.1145, 1804.0575, 1813.1035, 1824.0974, 1839.0932, 1900.1334, 1915.1486, 1931.1352, 1947.1417, 1949.1320, 1952.1522, 1966.1980, 1981.1803, 1994.1847, 2005.2465, 2021.1854, 2042.2539, 2044.2373, 2064.3065, 2117.3601, 2149.2508, 2181.2406, 2211.3162, 2215.2391, 2271.3649, 2284.3753, 2384.2549, 2399.3191, 2438.4857, 2450.5041, 2498.5023, 2615.5335, 2645.5873, 2681.5950, 2705.4362, 2717.3922, 2729.6061, 2745.6012, 2808.6023, 2856.6076, 2872.6380, 3048.6449, 3284.6878

12. [HSCA\\_AROAE](#) Mass: 66854 Score: 74 Expect: 0.014 Matches: 12  
 Chaperone protein HscA homolog OS=Aromatoleum aromaticum (strain EbN1) OX=76114 GN=hscA PE=3 SV=1

| Observed  | Mr(expt)  | Mr(calc)  | ppm    | Start | End   | Miss | Ions | Peptide                                     |
|-----------|-----------|-----------|--------|-------|-------|------|------|---------------------------------------------|
| 808.4445  | 807.4373  | 807.4425  | -6.52  | 89    | - 95  | 1    | ---  | R.FMGRGLK.D                                 |
| 832.4057  | 831.3984  | 831.4450  | -56.00 | 165   | - 172 | 1    | ---  | R.QATKDAAK.L                                |
| 857.5055  | 856.4982  | 856.5130  | -17.28 | 587   | - 594 | 1    | ---  | K.KGIEALAR.A                                |
| 964.5936  | 963.5863  | 963.5171  | 71.8   | 81    | - 88  | 1    | ---  | K.NTIMSVKR.F + Oxidation (M)                |
| 1240.6944 | 1239.6871 | 1239.7299 | -34.52 | 169   | - 180 | 1    | ---  | K.DAAKLAGLNVLRL.L                           |
| 1368.8298 | 1367.8225 | 1367.7409 | 59.7   | 321   | - 333 | 1    | ---  | K.VLRDAGLGPEVVK.G                           |
| 1617.9280 | 1616.9207 | 1616.8093 | 68.9   | 51    | - 64  | 1    | ---  | R.SMLPSIVRYHADGR.I + Oxidation (M)          |
| 1824.0974 | 1823.0901 | 1822.9577 | 72.6   | 416   | - 431 | 1    | ---  | R.NSTLPIARAQEFFTFK.D                        |
| 2149.2508 | 2148.2435 | 2148.0092 | 109    | 432   | - 450 | 1    | ---  | K.DGQTAMAFHVQGEREMVK.D + Oxidation (M)      |
| 2211.3162 | 2210.3090 | 2209.9950 | 142    | 96    | - 115 | 0    | ---  | K.DVSHVESTPYDFIDAGMVR.L + Oxidation (M)     |
| 2229.3298 | 2228.3225 | 2228.1405 | 81.7   | 38    | - 58  | 1    | 33   | R.NGIATVCLADEAGRSMLPSIVR.Y                  |
| 2399.3191 | 2398.3118 | 2398.2162 | 39.9   | 65    | - 87  | 1    | ---  | R.IEVGQTAAAHHTDPKNTIMSVKR.R + Oxidation (M) |

**No match to:** 790.5086, 804.3324, 817.4935, 837.5595, 842.5625, 930.5245, 982.6070, 986.6133, 1006.6445, 1015.6326, 1027.6664, 1042.6300, 1078.6445, 1107.8344, 1142.6742, 1153.6546, 1165.6966, 1179.7073, 1186.7303, 1197.6582, 1214.7097, 1219.6443, 1233.7159, 1265.7392, 1269.7243, 1326.7883, 1380.8667, 1428.9212, 1450.8531, 1475.8727, 1477.8489, 1484.8980, 1530.8700, 1557.9283, 1575.0154, 1598.9839, 1631.9464, 1654.9735, 1658.9825, 1708.0185, 1712.9684, 1724.0543, 1729.0035, 1733.0874, 1756.0868, 1781.0936, 1797.1145, 1804.0575, 1813.1035, 1839.0932, 1850.0717, 1882.1314, 1900.1334, 1915.1486, 1931.1352, 1938.1476, 1947.1417, 1949.1320, 1952.1522, 1966.1980, 1981.1803, 1994.1847, 2005.2465, 2021.1854, 2042.2539, 2044.2373, 2064.3065, 2117.3601, 2181.2406, 2215.2391, 2271.3649, 2284.3753, 2384.2549, 2438.4857, 2450.5041, 2498.5023, 2615.5335, 2645.5873, 2681.5950, 2705.4362, 2717.3922, 2729.6061, 2745.6012, 2808.6023, 2856.6076, 2872.6380, 3048.6449, 3284.6878

**13. LEU1 BUCUN** Mass: 56434 Score: 72 Expect: 0.022 Matches: 6  
 2-isopropylmalate synthase (Fragment) OS=Buchnera aphidicola subsp. Uroleucon sonchi OX=118118 GN=leuA PE=3 SV=1

| Observed  | Mr(expt)  | Mr(calc)  | ppm    | Start | End | Miss | Ions | Peptide                                 |
|-----------|-----------|-----------|--------|-------|-----|------|------|-----------------------------------------|
| 790.5086  | 789.5013  | 789.4345  | 84.7   | 256   | -   | 262  | 0    | --- R.TSQVISR.I                         |
| 930.5245  | 929.5172  | 929.5658  | -52.29 | 311   | -   | 318  | 1    | --- K.VKLNLTSR.S                        |
| 1475.8727 | 1474.8655 | 1474.7701 | 64.7   | 223   | -   | 236  | 0    | 39 R.AGNTALEEIVMAIK.V + Oxidation (M)   |
| 1724.0543 | 1723.0470 | 1722.8498 | 114    | 296   | -   | 310  | 1    | --- R.ENYEIMDPSSIGLKK.V                 |
| 1882.1314 | 1881.1241 | 1880.8938 | 122    | 294   | -   | 309  | 1    | --- K.NRENYEIMDPSSIGLKK + Oxidation (M) |
| 1966.1980 | 1965.1907 | 1964.9554 | 120    | 25    | -   | 43   | 0    | 19 K.AGVDIMVEVGFPISSGDFK.S              |

**No match to:** 804.3324, 808.4445, 817.4935, 832.4057, 837.5595, 842.5625, 857.5055, 964.5936, 982.6070, 986.6133, 1006.6445, 1015.6326, 1027.6664, 1042.6300, 1078.6445, 1107.8344, 1142.6742, 1153.6546, 1165.6966, 1179.7073, 1186.7303, 1197.6582, 1214.7097, 1219.6443, 1233.7159, 1240.6944, 1265.7392, 1269.7243, 1326.7883, 1368.8298, 1380.8667, 1428.9212, 1450.8531, 1477.8489, 1484.8980, 1530.8700, 1557.9283, 1575.0154, 1598.9839, 1617.9280, 1631.9464, 1654.9735, 1658.9825, 1708.0185, 1712.9684, 1729.0035, 1733.0874, 1756.0868, 1781.0936, 1797.1145, 1804.0575, 1813.1035, 1824.0974, 1839.0932, 1850.0717, 1900.1334, 1915.1486, 1931.1352, 1938.1476, 1947.1417, 1949.1320, 1952.1522, 1981.1803, 1994.1847, 2005.2465, 2021.1854, 2042.2539, 2044.2373, 2064.3065, 2117.3601, 2149.2508, 2181.2406, 2211.3162, 2215.2391, 2229.3298, 2271.3649, 2284.3753, 2384.2549, 2399.3191, 2438.4857, 2450.5041, 2498.5023, 2615.5335, 2645.5873, 2681.5950, 2705.4362, 2717.3922, 2729.6061, 2745.6012, 2808.6023, 2856.6076, 3048.6449, 3284.6878

**14. SECA PROM4** Mass: 107505 Score: 71 Expect: 0.025 Matches: 12  
 Protein translocase subunit SecA OS=Prochlorococcus marinus (strain MIT 9211) OX=93059 GN=secA PE=3 SV=1

| Observed  | Mr(expt)  | Mr(calc)  | ppm   | Start | End | Miss | Ions | Peptide                                              |
|-----------|-----------|-----------|-------|-------|-----|------|------|------------------------------------------------------|
| 808.4445  | 807.4373  | 807.4239  | 16.6  | 41    | -   | 47   | 1    | --- R.AKTADFR.E                                      |
| 857.5055  | 856.4982  | 856.5018  | -4.18 | 589   | -   | 595  | 0    | --- K.VLIDLER.K                                      |
| 1428.9212 | 1427.9139 | 1427.7197 | 136   | 299   | -   | 310  | 0    | --- K.DFWAHYITNALK.A                                 |
| 1598.9839 | 1597.9766 | 1597.8689 | 67.4  | 128   | -   | 141  | 1    | --- R.GVHVVTVNDYLARR.D                               |
| 1631.9464 | 1630.9392 | 1630.8712 | 41.7  | 242   | -   | 257  | 1    | 17 K.AAEVVASLIRAEMGK.D + Oxidation (M)               |
| 1824.0974 | 1823.0901 | 1822.9247 | 90.7  | 507   | -   | 523  | 1    | --- R.GTDIILGGNSDYMARLK.L                            |
| 1947.1417 | 1946.1345 | 1945.9680 | 85.5  | 325   | -   | 342  | 1    | --- R.NGEAVIVDEFTGRVMPGR.R                           |
| 1966.1980 | 1965.1907 | 1965.1272 | 32.3  | 532   | -   | 548  | 1    | 31 K.LVKPEDGKHPVPLQRR.S                              |
| 2042.2539 | 2041.2467 | 2041.1208 | 61.7  | 59    | -   | 75   | 1    | --- K.QRELLDEILPEVFSVVR.E                            |
| 2149.2508 | 2148.2435 | 2147.9544 | 135   | 928   | -   | 945  | 1    | --- R.NVIYSMFMPQAPESDKE.- + Oxidation (M)            |
| 2384.2549 | 2383.2476 | 2383.1664 | 34.1  | 86    | -   | 106  | 0    | --- R.HFDVQLIGGMVLHEGQIAEMK.T + 2 Oxidation (M)      |
| 2856.6076 | 2855.6003 | 2855.3946 | 72.0  | 86    | -   | 111  | 1    | --- R.HFDVQLIGGMVLHEGQIAEMKTGEGK.T + 2 Oxidation (M) |

**No match to:** 790.5086, 804.3324, 817.4935, 832.4057, 837.5595, 842.5625, 930.5245, 964.5936, 982.6070, 986.6133, 1006.6445, 1015.6326, 1027.6664, 1042.6300, 1078.6445, 1107.8344, 1142.6742, 1153.6546, 1165.6966, 1179.7073, 1186.7303, 1197.6582, 1214.7097, 1219.6443, 1233.7159, 1240.6944, 1265.7392, 1269.7243, 1326.7883, 1368.8298, 1380.8667, 1428.9212, 1450.8531, 1475.8727, 1477.8489, 1484.8980, 1530.8700, 1557.9283, 1575.0154, 1617.9280, 1654.9735, 1658.9825, 1708.0185, 1712.9684, 1724.0543, 1729.0035, 1733.0874, 1756.0868, 1781.0936, 1797.1145, 1804.0575, 1813.1035, 1839.0932, 1850.0717, 1882.1314, 1900.1334, 1915.1486, 1931.1352, 1938.1476, 1949.1320, 1952.1522, 1981.1803, 1994.1847, 2005.2465, 2021.1854, 2042.2539, 2064.3065, 2117.3601, 2181.2406, 2211.3162, 2215.2391, 2229.3298, 2271.3649, 2284.3753, 2399.3191, 2438.4857, 2450.5041, 2498.5023, 2615.5335, 2645.5873, 2681.5950, 2705.4362, 2717.3922, 2729.6061, 2745.6012, 2808.6023, 2856.6076, 3048.6449, 3284.6878

**15. RPOA PROM1** Mass: 34244 Score: 71 Expect: 0.026 Matches: 5  
 DNA-directed RNA polymerase subunit alpha OS=Prochlorococcus marinus (strain NATL1A) OX=167555 GN=rpoA PE=3 SV=1

| Observed  | Mr(expt)  | Mr(calc)  | ppm     | Start | End | Miss | Ions | Peptide                                 |
|-----------|-----------|-----------|---------|-------|-----|------|------|-----------------------------------------|
| 804.3324  | 803.3251  | 803.4137  | -110.29 | 84    | -   | 90   | 0    | --- K.QISVDSR.S                         |
| 1197.6582 | 1196.6509 | 1196.7129 | -51.78  | 99    | -   | 110  | 1    | --- R.LVVTPGADVAKK.D                    |
| 1475.8727 | 1474.8655 | 1474.7814 | 57.0    | 43    | -   | 57   | 0    | 28 R.VLMGGLEGSAVTAVR.I + Oxidation (M)  |
| 1631.9464 | 1630.9392 | 1630.8825 | 34.8    | 42    | -   | 57   | 1    | 27 R.RVLMGGLEGSAVTAVR.I + Oxidation (M) |
| 2117.3601 | 2116.3529 | 2116.0834 | 127     | 73    | -   | 90   | 1    | --- R.EDVLDLILNCKQISVDSR.S              |

**No match to:** 790.5086, 808.4445, 817.4935, 832.4057, 837.5595, 842.5625, 857.5055, 930.5245, 964.5936, 982.6070, 986.6133, 1006.6445, 1015.6326, 1027.6664, 1042.6300, 1078.6445, 1107.8344, 1142.6742, 1153.6546, 1165.6966, 1179.7073, 1186.7303, 1197.6582, 1214.7097, 1219.6443, 1233.7159, 1240.6944, 1265.7392, 1269.7243, 1326.7883, 1368.8298, 1380.8667, 1428.9212, 1450.8531, 1477.8489, 1484.8980, 1530.8700, 1557.9283, 1575.0154, 1598.9839, 1617.9280, 1654.9735, 1658.9825, 1708.0185, 1712.9684, 1724.0543, 1729.0035, 1733.0874, 1756.0868, 1781.0936, 1797.1145, 1804.0575, 1813.1035, 1824.0974, 1839.0932, 1850.0717, 1882.1314, 1900.1334, 1915.1486, 1931.1352, 1938.1476, 1947.1417, 1949.1320, 1952.1522, 1966.1980, 1981.1803, 1994.1847, 2005.2465, 2021.1854, 2042.2539, 2044.2373, 2064.3065, 2117.3601, 2149.2508, 2181.2406, 2211.3162, 2215.2391, 2229.3298, 2271.3649, 2284.3753, 2384.2549, 2399.3191, 2438.4857, 2450.5041, 2498.5023, 2615.5335, 2645.5873, 2681.5950, 2705.4362, 2717.3922, 2729.6061, 2745.6012, 2808.6023, 2856.6076, 2872.6380, 3048.6449, 3284.6878

**16. RPOA PROMT** Mass: 34244 Score: 71 Expect: 0.026 Matches: 5  
 DNA-directed RNA polymerase subunit alpha OS=Prochlorococcus marinus (strain NATL2A) OX=59920 GN=rpoA PE=3 SV=1

| Observed  | Mr(expt)  | Mr(calc)  | ppm     | Start | End | Miss | Ions | Peptide                                 |
|-----------|-----------|-----------|---------|-------|-----|------|------|-----------------------------------------|
| 804.3324  | 803.3251  | 803.4137  | -110.29 | 84    | -   | 90   | 0    | --- K.QISVDSR.S                         |
| 1197.6582 | 1196.6509 | 1196.7129 | -51.78  | 99    | -   | 110  | 1    | --- R.LVVTPGADVAKK.D                    |
| 1475.8727 | 1474.8655 | 1474.7814 | 57.0    | 43    | -   | 57   | 0    | 28 R.VLMGGLEGSAVTAVR.I + Oxidation (M)  |
| 1631.9464 | 1630.9392 | 1630.8825 | 34.8    | 42    | -   | 57   | 1    | 27 R.RVLMGGLEGSAVTAVR.I + Oxidation (M) |
| 2117.3601 | 2116.3529 | 2116.0834 | 127     | 73    | -   | 90   | 1    | --- R.EDVLDLILNCKQISVDSR.S              |

**No match to:** 790.5086, 808.4445, 817.4935, 832.4057, 837.5595, 842.5625, 857.5055, 930.5245, 964.5936, 982.6070, 986.6133, 1006.6445, 1015.6326, 1027.6664, 1042.6300, 1078.6445, 1107.8344, 1142.6742, 1153.6546, 1165.6966, 1179.7073, 1186.7303, 1214.7097, 1219.6443, 1233.7159, 1240.6944, 1265.7392, 1269.7243, 1326.7883, 1368.8298, 1380.8667, 1428.9212, 1450.8531, 1477.8489, 1484.8980, 1530.8700, 1557.9283, 1575.0154, 1598.9839, 1617.9280, 1654.9735, 1658.9825, 1708.0185, 1712.9684, 1724.0543, 1729.0035, 1733.0874, 1756.0868, 1781.0936, 1797.1145, 1804.0575, 1813.1035, 1824.0974, 1839.0932, 1850.0717, 1882.1314, 1900.1334, 1915.1486, 1931.1352, 1938.1476, 1947.1417, 1949.1320, 1952.1522, 1966.1980, 1981.1803, 1994.1847, 2005.2465, 2021.1854, 2042.2539, 2044.2373, 2064.3065, 2117.3601, 2149.2508, 2181.2406, 2211.3162, 2215.2391, 2229.3298, 2271.3649, 2284.3753, 2384.2549, 2399.3191, 2438.4857, 2450.5041, 2498.5023, 2615.5335, 2645.5873, 2681.5950, 2705.4362, 2717.3922, 2729.6061, 2745.6012, 2808.6023, 2856.6076, 2872.6380, 3048.6449, 3284.6878

**17. PROA BRUSU** Mass: 44300 Score: 69 Expect: 0.039 Matches: 9  
 Gamma-glutamyl phosphate reductase OS=Brucella suis biovar 1 (strain 1330) OX=204722 GN=proA PE=3 SV=1

| Observed  | Mr(expt)  | Mr(calc)  | ppm  | Start | End | Miss | Ions | Peptide                  |
|-----------|-----------|-----------|------|-------|-----|------|------|--------------------------|
| 1015.6326 | 1014.6253 | 1014.5345 | 89.5 | 80    | -   | 88   | 0    | --- R.IDAIEDIR.A         |
| 1475.8727 | 1474.8655 | 1474.7450 | 81.7 | 258   | -   | 271  | 0    | 21 R.TGICGAAETLLVDR.A    |
| 1631.9464 | 1630.9392 | 1630.8461 | 57.1 | 257   | -   | 271  | 1    | --- R.RTGICGAAETLLVDR.A  |
| 1756.0868 | 1755.0795 | 1754.9162 | 93.0 | 47    | -   | 62   | 1    | --- R.ADILEANRLDLANAEL.N |
| 1813.1035 | 1812.0963 | 1811.9741 | 67.4 | 73    | -   | 88   | 1    | --- R.LTLNEARIDIAIEDIR.A |

1938.1476 1937.1403 1936.9312 108 55 - 72 1 --- R.LDLANAENKNGMAASFVDR.L + Oxidation (M)  
 1966.1980 1965.1907 1965.1081 42.0 189 - 208 1 12 R.AAVGEMKLGKGGVIVIPR.G  
 2181.2406 2180.2333 2180.1549 36.0 34 - 54 1 --- K.ALNAAADALEARADILEANR.L  
 2681.5950 2680.5877 2680.3795 77.7 217 - 239 1 --- R.VQSEARVVFVAHLEGICHLYIDK.S  
**No match to:** 790.5086, 804.3324, 808.4445, 817.4935, 832.4057, 837.5595, 842.5625, 857.5055, 930.5245, 964.5936, 982.6070, 986.6133, 1006.6445, 1027.6664, 1042.6300, 1078.6445, 1107.8344, 1142.6742, 1153.6546, 1165.6966, 1179.7073, 1186.7303, 1197.6582, 1214.7097, 1219.6443, 1233.7159, 1240.6944, 1265.7392, 1269.7243, 1326.7883, 1368.8298, 1380.8667, 1428.9212, 1450.8531, 1477.8489, 1484.8980, 1530.8700, 1557.9283, 1575.0154, 1598.9839, 1617.9280, 1654.9735, 1658.9825, 1708.0185, 1712.9684, 1724.0543, 1729.0035, 1733.0874, 1781.0936, 1797.1145, 1804.0575, 1824.0974, 1839.0932, 1850.0717, 1882.1314, 1900.1334, 1915.1486, 1931.1352, 1947.1417, 1949.1320, 1952.1522, 1981.1803, 1994.1847, 2005.2465, 2021.1854, 2042.2539, 2044.2373, 2064.3065, 2117.3601, 2149.2508, 2211.3162, 2215.2391, 2229.3298, 2271.3649, 2284.3753, 2384.2549, 2399.3191, 2438.4857, 2450.5041, 2498.5023, 2615.5335, 2645.5873, 2705.4362, 2717.3922, 2729.6061, 2745.6012, 2808.6023, 2856.6076, 2872.6380, 3048.6449, 3284.6878

18. [EFTU HERAU](#) Mass: 43768 Score: 69 Expect: 0.04 Matches: 3

Elongation factor Tu OS=Herpetosiphon aurantiacus OX=65 GN=tuf PE=3 SV=1

| Observed  | Mr(expt)  | Mr(calc)  | ppm     | Start | End | Miss | Ions | Peptide               |
|-----------|-----------|-----------|---------|-------|-----|------|------|-----------------------|
| 804.3324  | 803.3251  | 803.4436  | -147.44 | 35    | -   | 41   | 1    | K.TMALRGR.A           |
| 1631.9464 | 1630.9392 | 1630.7699 | 104     | 46    | -   | 59   | 1    | R.AFDQIDNAPEERAR.G    |
| 1947.1417 | 1946.1345 | 1946.0513 | 42.7    | 156   | -   | 172  | 1    | R.ELLTKYGFPGDEIPIVR.G |

**No match to:** 790.5086, 808.4445, 817.4935, 832.4057, 837.5595, 842.5625, 857.5055, 930.5245, 964.5936, 982.6070, 986.6133, 1006.6445, 1015.6326, 1027.6664, 1042.6300, 1078.6445, 1107.8344, 1142.6742, 1153.6546, 1165.6966, 1179.7073, 1186.7303, 1197.6582, 1214.7097, 1219.6443, 1233.7159, 1240.6944, 1265.7392, 1269.7243, 1326.7883, 1368.8298, 1380.8667, 1428.9212, 1450.8531, 1475.8727, 1477.8489, 1484.8980, 1530.8700, 1557.9283, 1575.0154, 1598.9839, 1617.9280, 1654.9735, 1658.9825, 1708.0185, 1712.9684, 1724.0543, 1729.0035, 1733.0874, 1756.0868, 1781.0936, 1797.1145, 1804.0575, 1813.1035, 1824.0974, 1839.0932, 1850.0717, 1882.1314, 1900.1334, 1915.1486, 1931.1352, 1938.1476, 1949.1320, 1952.1522, 1966.1980, 1981.1803, 1994.1847, 2005.2465, 2021.1854, 2042.2539, 2044.2373, 2064.3065, 2117.3601, 2149.2508, 2181.2406, 2211.3162, 2215.2391, 2229.3298, 2271.3649, 2284.3753, 2384.2549, 2399.3191, 2438.4857, 2450.5041, 2498.5023, 2615.5335, 2645.5873, 2681.5950, 2705.4362, 2717.3922, 2729.6061, 2745.6012, 2808.6023, 2856.6076, 2872.6380, 3048.6449, 3284.6878

19. [EFTU1 HALHL](#) Mass: 43283 Score: 69 Expect: 0.04 Matches: 3

Elongation factor Tu 1 OS=Halorhodospira halophila (strain DSM 244 / SL1) OX=349124 GN=tuf1 PE=3 SV=1

| Observed  | Mr(expt)  | Mr(calc)  | ppm  | Start | End | Miss | Ions | Peptide              |
|-----------|-----------|-----------|------|-------|-----|------|------|----------------------|
| 817.4935  | 816.4862  | 816.4705  | 19.2 | 385   | -   | 393  | 0    | R.TVGGVVSX.I         |
| 1631.9464 | 1630.9392 | 1630.7699 | 104  | 46    | -   | 59   | 1    | R.AFDQIDNAPEERAR.G   |
| 1654.9735 | 1653.9662 | 1653.8686 | 59.0 | 267   | -   | 282  | 0    | K.LLDQGEAGDNIGALLR.G |

**No match to:** 790.5086, 804.3324, 808.4445, 832.4057, 837.5595, 842.5625, 857.5055, 930.5245, 964.5936, 982.6070, 986.6133, 1006.6445, 1015.6326, 1027.6664, 1042.6300, 1078.6445, 1107.8344, 1142.6742, 1153.6546, 1165.6966, 1179.7073, 1186.7303, 1197.6582, 1214.7097, 1219.6443, 1233.7159, 1240.6944, 1265.7392, 1269.7243, 1326.7883, 1368.8298, 1380.8667, 1428.9212, 1450.8531, 1475.8727, 1477.8489, 1484.8980, 1530.8700, 1557.9283, 1575.0154, 1598.9839, 1617.9280, 1658.9825, 1708.0185, 1712.9684, 1724.0543, 1729.0035, 1733.0874, 1756.0868, 1781.0936, 1797.1145, 1804.0575, 1813.1035, 1824.0974, 1839.0932, 1850.0717, 1882.1314, 1900.1334, 1915.1486, 1931.1352, 1938.1476, 1947.1417, 1949.1320, 1952.1522, 1966.1980, 1981.1803, 1994.1847, 2005.2465, 2021.1854, 2042.2539, 2044.2373, 2064.3065, 2117.3601, 2149.2508, 2181.2406, 2211.3162, 2215.2391, 2229.3298, 2271.3649, 2284.3753, 2384.2549, 2399.3191, 2438.4857, 2450.5041, 2498.5023, 2615.5335, 2645.5873, 2681.5950, 2705.4362, 2717.3922, 2729.6061, 2745.6012, 2808.6023, 2856.6076, 2872.6380, 3048.6449, 3284.6878

20. [EFTU2 HALHL](#) Mass: 43269 Score: 69 Expect: 0.04 Matches: 3

Elongation factor Tu 2 OS=Halorhodospira halophila (strain DSM 244 / SL1) OX=349124 GN=tuf2 PE=3 SV=1

| Observed  | Mr(expt)  | Mr(calc)  | ppm  | Start | End | Miss | Ions | Peptide              |
|-----------|-----------|-----------|------|-------|-----|------|------|----------------------|
| 817.4935  | 816.4862  | 816.4705  | 19.2 | 385   | -   | 393  | 0    | R.TVGGVVSX.I         |
| 1631.9464 | 1630.9392 | 1630.7699 | 104  | 46    | -   | 59   | 1    | R.AFDQIDNAPEERAR.G   |
| 1654.9735 | 1653.9662 | 1653.8686 | 59.0 | 267   | -   | 282  | 0    | K.LLDQGEAGDNIGALLR.G |

**No match to:** 790.5086, 804.3324, 808.4445, 832.4057, 837.5595, 842.5625, 857.5055, 930.5245, 964.5936, 982.6070, 986.6133, 1006.6445, 1015.6326, 1027.6664, 1042.6300, 1078.6445, 1107.8344, 1142.6742, 1153.6546, 1165.6966, 1179.7073, 1186.7303, 1197.6582, 1214.7097, 1219.6443, 1233.7159, 1240.6944, 1265.7392, 1269.7243, 1326.7883, 1368.8298, 1380.8667, 1428.9212, 1450.8531, 1475.8727, 1477.8489, 1484.8980, 1530.8700, 1557.9283, 1575.0154, 1598.9839, 1617.9280, 1658.9825, 1708.0185, 1712.9684, 1724.0543, 1729.0035, 1733.0874, 1756.0868, 1781.0936, 1797.1145, 1804.0575, 1813.1035, 1824.0974, 1839.0932, 1850.0717, 1882.1314, 1900.1334, 1915.1486, 1931.1352, 1938.1476, 1947.1417, 1949.1320, 1952.1522, 1966.1980, 1981.1803, 1994.1847, 2005.2465, 2021.1854, 2042.2539, 2044.2373, 2064.3065, 2117.3601, 2149.2508, 2181.2406, 2211.3162, 2215.2391, 2229.3298, 2271.3649, 2284.3753, 2384.2549, 2399.3191, 2438.4857, 2450.5041, 2498.5023, 2615.5335, 2645.5873, 2681.5950, 2705.4362, 2717.3922, 2729.6061, 2745.6012, 2808.6023, 2856.6076, 2872.6380, 3048.6449, 3284.6878

## Search Parameters

Type of search : MS/MS Ion Search  
 Enzyme : Trypsin  
 Fixed modifications : [Carbamidomethyl \(C\)](#)  
 Variable modifications : [Oxidation \(M\)](#)  
 Mass values : Monoisotopic  
 Protein Mass : Unrestricted  
 Peptide Mass Tolerance : ± 150 ppm  
 Fragment Mass Tolerance : ± 2 Da  
 Max Missed Cleavages : 1  
 Instrument type : MALDI-TOF-TOF  
 Query1 (790.5086,1+) : <no title>  
 Query2 (804.3324,1+) : <no title>  
 Query3 (808.4445,1+) : <no title>  
 Query4 (817.4935,1+) : <no title>  
 Query5 (832.4057,1+) : <no title>  
 Query6 (837.5595,1+) : <no title>  
 Query7 (842.5625,1+) : <no title>  
 Query8 (857.5055,1+) : <no title>  
 Query9 (930.5245,1+) : <no title>  
 Query10 (964.5936,1+) : <no title>  
 Query11 (982.6070,1+) : <no title>  
 Query12 (986.6133,1+) : <no title>  
 Query13 (1006.6445,1+) : <no title>  
 Query14 (1015.6326,1+) : <no title>  
 Query15 (1027.6664,1+) : <no title>  
 Query16 (1042.6300,1+) : <no title>  
 Query17 (1078.6445,1+) : <no title>  
 Query18 (1107.8344,1+) : <no title>  
 Query19 (1142.6742,1+) : <no title>  
 Query20 (1153.6546,1+) : <no title>  
 Query21 (1165.6966,1+) : <no title>  
 Query22 (1179.7073,1+) : <no title>  
 Query23 (1186.7303,1+) : <no title>  
 Query24 (1197.6582,1+) : <no title>  
 Query25 (1214.7097,1+) : <no title>  
 Query26 (1219.6443,1+) : <no title>

Query27 (1233.7159,1+) : <no title>  
Query28 (1240.6944,1+) : <no title>  
Query29 (1265.7392,1+) : <no title>  
Query30 (1269.7243,1+) : <no title>  
Query31 (1326.7883,1+) : <no title>  
Query32 (1368.8298,1+) : <no title>  
Query33 (1380.8667,1+) : <no title>  
Query34 (1428.9212,1+) : <no title>  
Query35 (1450.8531,1+) : <no title>  
Query36 (1475.8727,1+) : <no title>  
Query37 (1477.8489,1+) : <no title>  
Query38 (1484.8980,1+) : <no title>  
Query39 (1530.8700,1+) : <no title>  
Query40 (1557.9283,1+) : <no title>  
Query41 (1575.0154,1+) : <no title>  
Query42 (1598.9839,1+) : <no title>  
Query43 (1617.9280,1+) : <no title>  
Query44 (1631.9464,1+) : <no title>  
Query45 (1654.9735,1+) : <no title>  
Query46 (1658.9825,1+) : <no title>  
Query47 (1708.0185,1+) : <no title>  
Query48 (1712.9684,1+) : <no title>  
Query49 (1724.0543,1+) : <no title>  
Query50 (1729.0035,1+) : <no title>  
Query51 (1733.0874,1+) : <no title>  
Query52 (1756.0868,1+) : <no title>  
Query53 (1781.0936,1+) : <no title>  
Query54 (1797.1145,1+) : <no title>  
Query55 (1804.0575,1+) : <no title>  
Query56 (1813.1035,1+) : <no title>  
Query57 (1824.0974,1+) : <no title>  
Query58 (1839.0932,1+) : <no title>  
Query59 (1850.0717,1+) : <no title>  
Query60 (1882.1314,1+) : <no title>  
Query61 (1900.1334,1+) : <no title>  
Query62 (1915.1486,1+) : <no title>  
Query63 (1931.1352,1+) : <no title>  
Query64 (1938.1476,1+) : <no title>  
Query65 (1947.1417,1+) : <no title>  
Query66 (1949.1320,1+) : <no title>  
Query67 (1952.1522,1+) : <no title>  
Query68 (1966.1980,1+) : <no title>  
Query69 (1981.1803,1+) : <no title>  
Query70 (1994.1847,1+) : <no title>  
Query71 (2005.2465,1+) : <no title>  
Query72 (2021.1854,1+) : <no title>  
Query73 (2042.2539,1+) : <no title>  
Query74 (2044.2373,1+) : <no title>  
Query75 (2064.3065,1+) : <no title>  
Query76 (2117.3601,1+) : <no title>  
Query77 (2149.2508,1+) : <no title>  
Query78 (2181.2406,1+) : <no title>  
Query79 (2211.3162,1+) : <no title>  
Query80 (2215.2391,1+) : <no title>  
Query81 (2229.3298,1+) : <no title>  
Query82 (2271.3649,1+) : <no title>  
Query83 (2284.3753,1+) : <no title>  
Query84 (2384.2549,1+) : <no title>  
Query85 (2399.3191,1+) : <no title>  
Query86 (2438.4857,1+) : <no title>  
Query87 (2450.5041,1+) : <no title>  
Query88 (2498.5023,1+) : <no title>  
Query89 (2615.5335,1+) : <no title>  
Query90 (2645.5873,1+) : <no title>  
Query91 (2681.5950,1+) : <no title>  
Query92 (2705.4362,1+) : <no title>  
Query93 (2717.3922,1+) : <no title>  
Query94 (2729.6061,1+) : <no title>  
Query95 (2745.6012,1+) : <no title>  
Query96 (2808.6023,1+) : <no title>  
Query97 (2856.6076,1+) : <no title>  
Query98 (2872.6380,1+) : <no title>  
Query99 (3048.6449,1+) : <no title>  
Query100 (3284.6878,1+) : <no title>

Mascot: <http://www.matrixscience.com/>

*MALDI MS MS Data Sheet of Urine  
Isolate*

Comment 1

Comment 2



| m/z      | S/N  | Quality | Fac. | Res.    | Intens. | Area |
|----------|------|---------|------|---------|---------|------|
| 1517.668 | 4.9  | 115     | 1684 | 473.46  | 1089    |      |
| 1520.891 | 5.5  | 189     | 1689 | 527.18  | 1212    |      |
| 1524.039 | 5.9  | 275     | 1693 | 563.19  | 1294    |      |
| 1538.552 | 5.7  | 95      | 2245 | 538.33  | 950     |      |
| 1543.084 | 3.7  | 235     | 3365 | 346.10  | 410     |      |
| 1549.886 | 32.7 | 18955   | 3045 | 2986.80 | 3937    |      |

Comment 1

Comment 2





Comment 1

Comment 2



| m/z      | S/N  | Quality Fac. | Res. | Intens. | Area |
|----------|------|--------------|------|---------|------|
| 111.949  | 7.7  | 3570         | 701  | 879.65  | 158  |
| 128.947  | 3.5  | 300          | 686  | 395.68  | 84   |
| 135.910  | 4.6  | 1225         | 1452 | 518.75  | 55   |
| 153.901  | 7.9  | 7500         | 1378 | 884.01  | 113  |
| 157.907  | 3.5  | 47           | 1112 | 391.59  | 64   |
| 170.892  | 3.5  | 52           | 1386 | 386.79  | 56   |
| 174.903  | 16.2 | 22161        | 1567 | 1780.25 | 232  |
| 191.865  | 3.0  | 380          | 1306 | 332.14  | 58   |
| 196.880  | 6.4  | 1273         | 1517 | 696.09  | 107  |
| 213.864  | 3.8  | 109          | 1495 | 422.51  | 72   |
| 246.813  | 3.0  | 72           | 1460 | 337.90  | 70   |
| 271.797  | 3.1  | 41           | 1586 | 360.25  | 76   |
| 287.810  | 3.4  | 113          | 1152 | 401.88  | 125  |
| 301.711  | 3.2  | 95           | 2092 | 385.45  | 70   |
| 318.707  | 3.0  | 37           | 1465 | 377.66  | 104  |
| 375.642  | 3.2  | 94           | 1262 | 442.48  | 173  |
| 415.600  | 4.0  | 116          | 1447 | 578.26  | 223  |
| 432.562  | 4.6  | 134          | 1687 | 672.08  | 233  |
| 636.448  | 3.8  | 143          | 1605 | 612.30  | 370  |
| 693.370  | 3.6  | 175          | 2165 | 569.49  | 287  |
| 733.351  | 3.8  | 114          | 2028 | 594.00  | 346  |
| 750.389  | 5.0  | 777          | 1955 | 773.36  | 483  |
| 863.339  | 4.5  | 825          | 2222 | 665.55  | 449  |
| 950.391  | 3.7  | 368          | 2107 | 518.67  | 427  |
| 1037.322 | 4.0  | 266          | 2701 | 553.28  | 407  |
| 1108.270 | 3.2  | 84           | 2122 | 447.44  | 469  |
| 2624.440 | 5.5  | 178          | 3925 | 489.81  | 1138 |
| 2629.634 | 4.1  | 58           | 2923 | 356.91  | 1117 |
| 2634.529 | 3.6  | 63           | 2925 | 313.11  | 981  |
| 2638.928 | 5.2  | 103          | 2933 | 416.48  | 1305 |
| 2643.993 | 4.5  | 95           | 2936 | 365.00  | 1145 |
| 2649.931 | 3.9  | 66           | 2943 | 316.70  | 996  |
| 2705.361 | 19.7 | 14471        | 4251 | 1547.18 | 3477 |

Comment 1

Comment 2



| m/z      | S/N  | Quality Fac. | Res. | Intens. | Area |
|----------|------|--------------|------|---------|------|
| 842.564  | 8.5  | 1479         | 4124 | 1141.12 | 406  |
| 870.594  | 6.3  | 810          | 3626 | 843.69  | 360  |
| 1107.621 | 7.0  | 368          | 4361 | 920.00  | 480  |
| 1153.695 | 6.6  | 435          | 7420 | 864.70  | 296  |
| 1162.697 | 6.4  | 79           | 5812 | 840.57  | 356  |
| 1164.675 | 7.2  | 202          | 5022 | 945.43  | 466  |
| 1179.677 | 29.4 | 13665        | 5948 | 3848.40 | 1651 |
| 1193.698 | 6.3  | 216          | 6222 | 828.88  | 347  |
| 1229.897 | 8.1  | 861          | 6044 | 1057.70 | 470  |
| 1234.747 | 19.4 | 1998         | 5959 | 2515.46 | 1162 |
| 1266.703 | 20.2 | 7660         | 5763 | 2607.41 | 1294 |
| 1280.752 | 6.7  | 596          | 5593 | 860.29  | 449  |
| 1308.753 | 11.9 | 2233         | 5063 | 1524.58 | 903  |
| 1320.680 | 8.4  | 366          | 4093 | 1070.68 | 798  |
| 1340.777 | 6.2  | 847          | 5061 | 785.04  | 486  |
| 1365.753 | 7.5  | 1696         | 5083 | 940.11  | 599  |
| 1390.832 | 6.2  | 571          | 4547 | 770.56  | 566  |
| 1422.803 | 7.2  | 1515         | 5520 | 886.07  | 563  |
| 1434.864 | 9.2  | 2839         | 6133 | 1119.94 | 654  |
| 1475.856 | 22.1 | 8771         | 6540 | 2640.49 | 1515 |
| 1493.845 | 22.8 | 12552        | 6061 | 2706.52 | 1720 |
| 1549.897 | 25.0 | 18485        | 6858 | 2870.36 | 1737 |
| 1598.938 | 9.2  | 6046         | 6343 | 1023.43 | 712  |
| 1657.932 | 6.1  | 633          | 4757 | 649.91  | 642  |
| 1707.905 | 22.7 | 25644        | 6707 | 2328.44 | 1744 |
| 1791.889 | 13.1 | 2963         | 5653 | 1260.03 | 1223 |
| 1839.063 | 8.8  | 5216         | 6673 | 816.14  | 712  |
| 1989.125 | 14.0 | 8035         | 6866 | 1079.87 | 1006 |
| 2045.190 | 6.4  | 1553         | 5619 | 454.15  | 531  |
| 2211.271 | 22.9 | 11216        | 9070 | 1293.53 | 1038 |
| 2384.133 | 35.3 | 15290        | 8029 | 1597.91 | 1625 |
| 2399.201 | 10.1 | 6130         | 8689 | 449.30  | 425  |
| 2501.418 | 10.3 | 1439         | 6624 | 403.84  | 528  |
| 2705.331 | 37.2 | 60552        | 9753 | 1110.08 | 1115 |
| 2717.253 | 19.7 | 3369         | 7836 | 580.75  | 734  |
| 2869.542 | 6.6  | 1077         | 6568 | 160.65  | 262  |

**MATRIX SCIENCE Mascot Search Results**

User : sanovar  
 Email : sanovar@sandor.co.in  
 Search title :  
 MS data file : DATA.TXT  
 Database : SwissProt 2018\_06 (557713 sequences; 200130199 residues)  
 Taxonomy : Bacteria (Eubacteria) (333552 sequences)  
 Timestamp : 11 Jul 2018 at 12:08:07 GMT  
 Warning : **A Peptide summary report will usually give a much clearer picture of MS/MS search results.**  
 Top Score : 75 for **TKT1\_ECOLI**, Transketolase 1 OS=Escherichia coli (strain K12) OX=83333 GN=tktA PE=1 SV=5

**Mascot Score Histogram**

Protein score is  $-10 \cdot \log(P)$ , where P is the probability that the observed match is a random event.  
 Protein scores greater than 68 are significant ( $p < 0.05$ ).  
 Protein scores are derived from ions scores as a non-probabilistic basis for ranking protein hits.

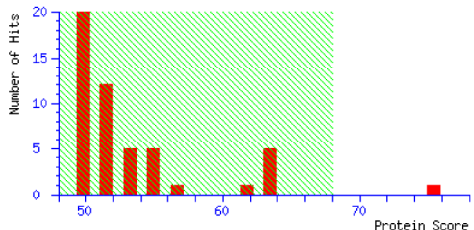

**Protein Summary Report**

Format As  [Help](#)  
 Significance threshold  $p <$   Max. number of hits   
 Preferred taxonomy

**Index**

| Accession                      | Mass   | Score | Description                                                                                              |
|--------------------------------|--------|-------|----------------------------------------------------------------------------------------------------------|
| 1. <a href="#">TKT1_ECOLI</a>  | 72451  | 75    | Transketolase 1 OS=Escherichia coli (strain K12) OX=83333 GN=tktA PE=1 SV=5                              |
| 2. <a href="#">RS1_DICD3</a>   | 61334  | 63    | 30S ribosomal protein S1 OS=Dickeya dadantii (strain 3937) OX=198628 GN=rpsA PE=3 SV=2                   |
| 3. <a href="#">RS1_ECO57</a>   | 61235  | 63    | 30S ribosomal protein S1 OS=Escherichia coli O157:H7 OX=83334 GN=rpsA PE=3 SV=1                          |
| 4. <a href="#">RS1_ECOL6</a>   | 61235  | 63    | 30S ribosomal protein S1 OS=Escherichia coli O6:H1 (strain CFT073 / ATCC 700928 / UPEC) OX=199310 GN=rp  |
| 5. <a href="#">RS1_ECOLI</a>   | 61235  | 63    | 30S ribosomal protein S1 OS=Escherichia coli (strain K12) OX=83333 GN=rpsA PE=1 SV=1                     |
| 6. <a href="#">RS1_SHIFL</a>   | 61235  | 63    | 30S ribosomal protein S1 OS=Shigella flexneri OX=623 GN=rpsA PE=3 SV=1                                   |
| 7. <a href="#">ATPG_BACCA</a>  | 32323  | 61    | ATP synthase gamma chain OS=Bacillus caldotenax OX=1395 GN=atpG PE=3 SV=1                                |
| 8. <a href="#">DXR_CLOMB</a>   | 43041  | 57    | 1-deoxy-D-xylulose 5-phosphate reductoisomerase OS=Clostridium botulinum (strain Loch Maree / Type A3) ( |
| 9. <a href="#">DXR_CLOB6</a>   | 43168  | 56    | 1-deoxy-D-xylulose 5-phosphate reductoisomerase OS=Clostridium botulinum (strain 657 / Type Ba4) OX=5151 |
| 10. <a href="#">DXR_CLOBJ</a>  | 43182  | 56    | 1-deoxy-D-xylulose 5-phosphate reductoisomerase OS=Clostridium botulinum (strain Kyoto / Type A2) OX=531 |
| 11. <a href="#">DXR_CLOBL</a>  | 43212  | 56    | 1-deoxy-D-xylulose 5-phosphate reductoisomerase OS=Clostridium botulinum (strain Langeland / NCTC 10281  |
| 12. <a href="#">DXR_CLOBK</a>  | 43169  | 55    | 1-deoxy-D-xylulose 5-phosphate reductoisomerase OS=Clostridium botulinum (strain Okra / Type B1) OX=498: |
| 13. <a href="#">ERA_LACH4</a>  | 34027  | 54    | GTPase Era OS=Lactobacillus helveticus (strain DPC 4571) OX=405566 GN=era PE=3 SV=1                      |
| 14. <a href="#">ASSY_SOLUE</a> | 50458  | 54    | Argininosuccinate synthase OS=Solibacter usitatus (strain Ellin6076) OX=234267 GN=argG PE=3 SV=1         |
| 15. <a href="#">IOLG_RUBXD</a> | 37446  | 54    | Inositol 2-dehydrogenase OS=Rubrobacter xylanophilus (strain DSM 9941 / NBRC 16129) OX=266117 GN=iolG PI |
| 16. <a href="#">UREG_RHOPE</a> | 22253  | 53    | Urease accessory protein UreG OS=Rhodospseudomonas palustris (strain BisB18) OX=316056 GN=ureG PE=3 SV=1 |
| 17. <a href="#">CCPA_STAEQ</a> | 36500  | 53    | Catabolite control protein A OS=Staphylococcus epidermidis (strain ATCC 35984 / RP62A) OX=176279 GN=ccp1 |
| 18. <a href="#">CCPA_STAES</a> | 36500  | 53    | Catabolite control protein A OS=Staphylococcus epidermidis (strain ATCC 12228) OX=176280 GN=ccpA PE=3 SV |
| 19. <a href="#">ACKA_PORG3</a> | 43586  | 52    | Acetate kinase OS=Porphyromonas gingivalis (strain ATCC 33277 / DSM 20709 / CIP 103683 / JCM 12257 / NC' |
| 20. <a href="#">RPOC_PSYCK</a> | 155806 | 52    | DNA-directed RNA polymerase subunit beta' OS=Psychrobacter cryohalolentis (strain K5) OX=335284 GN=rpoC  |

**Results List**

|                                                                                                                                                                                                                                                                                                                                                                                                                                                                                                                                                                                                                                                                                                                                                                                                                                                                                                                                                                                                                                                                                                                                                                           |                            |                 |                 |                |                                         |
|---------------------------------------------------------------------------------------------------------------------------------------------------------------------------------------------------------------------------------------------------------------------------------------------------------------------------------------------------------------------------------------------------------------------------------------------------------------------------------------------------------------------------------------------------------------------------------------------------------------------------------------------------------------------------------------------------------------------------------------------------------------------------------------------------------------------------------------------------------------------------------------------------------------------------------------------------------------------------------------------------------------------------------------------------------------------------------------------------------------------------------------------------------------------------|----------------------------|-----------------|-----------------|----------------|-----------------------------------------|
| 1.                                                                                                                                                                                                                                                                                                                                                                                                                                                                                                                                                                                                                                                                                                                                                                                                                                                                                                                                                                                                                                                                                                                                                                        | <a href="#">TKT1_ECOLI</a> | Mass: 72451     | Score: 75       | Expect: 0.0096 | Matches: 6                              |
| Transketolase 1 OS=Escherichia coli (strain K12) OX=83333 GN=tktA PE=1 SV=5                                                                                                                                                                                                                                                                                                                                                                                                                                                                                                                                                                                                                                                                                                                                                                                                                                                                                                                                                                                                                                                                                               |                            |                 |                 |                |                                         |
|                                                                                                                                                                                                                                                                                                                                                                                                                                                                                                                                                                                                                                                                                                                                                                                                                                                                                                                                                                                                                                                                                                                                                                           | <b>Observed</b>            | <b>Mr(expt)</b> | <b>Mr(calc)</b> | <b>ppm</b>     | <b>Start End Miss Ions Peptide</b>      |
|                                                                                                                                                                                                                                                                                                                                                                                                                                                                                                                                                                                                                                                                                                                                                                                                                                                                                                                                                                                                                                                                                                                                                                           | 1033.5958                  | 1032.5885       | 1032.5604       | 27.2           | 245 - 254 0 --- K.TIIFGSPNK.A           |
|                                                                                                                                                                                                                                                                                                                                                                                                                                                                                                                                                                                                                                                                                                                                                                                                                                                                                                                                                                                                                                                                                                                                                                           | 1277.7589                  | 1276.7516       | 1276.6353       | 91.1           | 205 - 214 0 --- R.FEAYGWHVIR.D          |
|                                                                                                                                                                                                                                                                                                                                                                                                                                                                                                                                                                                                                                                                                                                                                                                                                                                                                                                                                                                                                                                                                                                                                                           | 1329.7326                  | 1328.7254       | 1328.7452       | -14.93         | 343 - 354 1 --- K.EFIAKLQANPAK.I        |
|                                                                                                                                                                                                                                                                                                                                                                                                                                                                                                                                                                                                                                                                                                                                                                                                                                                                                                                                                                                                                                                                                                                                                                           | 1983.1414                  | 1982.1341       | 1982.0261       | 54.5           | 604 - 621 1 --- K.AVTARVAEAGIADYWYK.Y   |
|                                                                                                                                                                                                                                                                                                                                                                                                                                                                                                                                                                                                                                                                                                                                                                                                                                                                                                                                                                                                                                                                                                                                                                           | 1989.1250                  | 1988.1177       | 1987.9712       | 73.7           | 255 - 274 0 63 K.AGTHDSHGAPLGDAEIALTR.E |
|                                                                                                                                                                                                                                                                                                                                                                                                                                                                                                                                                                                                                                                                                                                                                                                                                                                                                                                                                                                                                                                                                                                                                                           | 2001.0988                  | 2000.0915       | 1999.9309       | 80.3           | 580 - 597 1 --- R.VVSMPSDADFQDAAYR.E    |
| <b>No match to:</b> 720.3201, 721.3315, 724.3214, 804.3108, 842.5642, 865.5456, 870.5940, 881.3242, 969.5548, 973.5948, 982.5138, 1037.6072, 1045.6282, 1047.6804, 1064.6488, 1072.6447, 1077.2496, 1082.6362, 1093.6181, 1107.6212, 1109.5910, 1118.5838, 1140.6515, 1153.6950, 1163.6855, 1164.6754, 1165.6684, 1179.6771, 1184.6858, 1193.6977, 1195.6893, 1201.7343, 1229.8974, 1232.6901, 1253.7005, 1259.2801, 1259.7540, 1263.2247, 1263.7024, 1266.7035, 1280.7521, 1283.7721, 1302.8009, 1306.7653, 1308.7528, 1310.3027, 1320.6798, 1323.2817, 1323.7637, 1324.7890, 1326.3207, 1332.7618, 1340.7775, 1343.7777, 1357.7890, 1365.7525, 1373.7532, 1390.8324, 1393.8069, 1407.7954, 1422.8033, 1434.8643, 1460.8550, 1475.8557, 1490.8367, 1493.8451, 1549.8969, 1598.9377, 1638.9642, 1657.9317, 1684.0126, 1699.9639, 1707.9051, 1716.9715, 1740.9356, 1781.0033, 1789.0003, 1791.8887, 1804.0297, 1839.0630, 1847.0491, 1852.0436, 2083.1533, 2128.1603, 2211.2706, 2215.3315, 2286.2807, 2299.3189, 2329.2726, 2343.2471, 2384.1325, 2399.2011, 2441.2881, 2501.4182, 2510.3224, 2705.3310, 2717.2530, 2848.5165, 2869.5420, 3223.3745, 3264.5742, 3312.3559 |                            |                 |                 |                |                                         |
| 2.                                                                                                                                                                                                                                                                                                                                                                                                                                                                                                                                                                                                                                                                                                                                                                                                                                                                                                                                                                                                                                                                                                                                                                        | <a href="#">RS1_DICD3</a>  | Mass: 61334     | Score: 63       | Expect: 0.18   | Matches: 2                              |
| 30S ribosomal protein S1 OS=Dickeya dadantii (strain 3937) OX=198628 GN=rpsA PE=3 SV=2                                                                                                                                                                                                                                                                                                                                                                                                                                                                                                                                                                                                                                                                                                                                                                                                                                                                                                                                                                                                                                                                                    |                            |                 |                 |                |                                         |
|                                                                                                                                                                                                                                                                                                                                                                                                                                                                                                                                                                                                                                                                                                                                                                                                                                                                                                                                                                                                                                                                                                                                                                           | <b>Observed</b>            | <b>Mr(expt)</b> | <b>Mr(calc)</b> | <b>ppm</b>     | <b>Start End Miss Ions Peptide</b>      |
|                                                                                                                                                                                                                                                                                                                                                                                                                                                                                                                                                                                                                                                                                                                                                                                                                                                                                                                                                                                                                                                                                                                                                                           | 1329.7326                  | 1328.7254       | 1328.7664       | -30.87         | 451 - 464 1 --- K.GAIVTGKVTAVDAK.G      |
|                                                                                                                                                                                                                                                                                                                                                                                                                                                                                                                                                                                                                                                                                                                                                                                                                                                                                                                                                                                                                                                                                                                                                                           | 1549.8969                  | 1548.8896       | 1548.7784       | 71.8           | 465 - 479 0 63 K.GATVELADGVEGYLR.A      |
| <b>No match to:</b> 720.3201, 721.3315, 724.3214, 804.3108, 842.5642, 865.5456, 870.5940, 881.3242, 969.5548, 973.5948, 982.5138, 1033.5958, 1037.6072, 1045.6282, 1047.6804, 1064.6488, 1072.6447, 1077.2496, 1082.6362, 1093.6181, 1107.6212, 1109.5910,                                                                                                                                                                                                                                                                                                                                                                                                                                                                                                                                                                                                                                                                                                                                                                                                                                                                                                                |                            |                 |                 |                |                                         |

1118.5838, 1140.6515, 1153.6950, 1163.6855, 1164.6754, 1165.6684, 1179.6771, 1184.6858, 1193.6977, 1195.6893, 1201.7343, 1229.8974, 1232.6901, 1253.7005, 1259.2801, 1259.7540, 1263.2247, 1263.7024, 1266.7035, 1277.7589, 1280.7521, 1283.7721, 1302.8009, 1306.7653, 1308.7528, 1310.3027, 1320.6798, 1323.2817, 1323.7637, 1324.7890, 1326.3207, 1332.7618, 1340.7775, 1343.7777, 1357.7890, 1365.7525, 1373.7532, 1390.8324, 1393.8069, 1407.7954, 1422.8033, 1434.8643, 1460.8550, 1475.8557, 1490.8367, 1493.8451, 1598.9377, 1638.9642, 1657.9317, 1684.0126, 1699.9639, 1707.9051, 1716.9715, 1740.9356, 1781.0033, 1789.0003, 1791.8887, 1804.0297, 1839.0630, 1847.0491, 1852.0436, 1983.1414, 1989.1250, 2001.0988, 2083.1533, 2128.1603, 2211.2706, 2215.3315, 2286.2807, 2299.3189, 2329.2726, 2343.2471, 2384.1325, 2399.2011, 2441.2881, 2501.4182, 2510.3224, 2705.3310, 2717.2530, 2848.5165, 2869.5420, 3223.3745, 3264.5742, 3312.3559

3. [Rsi\\_ECO57](#) Mass: 61235 Score: 63 Expect: 0.18 Matches: 2

30S ribosomal protein S1 OS=Escherichia coli O157:H7 OX=83334 GN=rpsA PE=3 SV=1

Table with 8 columns: Observed, Mr(expt), Mr(calc), ppm, Start, End, Miss, Ions, Peptide. Row 1: 1329.7326 1328.7254 1328.7664 -30.87 451 - 464 1 --- K.GAIVTGVKTAVDAK.G

1549.8969 1548.8896 1548.7784 71.8 465 - 479 0 63 K.GATVELADGVEGYLR.A
No match to: 720.3201, 721.3315, 724.3214, 804.3108, 842.5642, 865.5456, 870.5940, 881.3242, 969.5548, 973.5948, 982.5138, 1033.5958, 1037.6072, 1045.6282, 1047.6804, 1064.6488, 1072.6447, 1077.2496, 1082.6362, 1093.6181, 1107.6212, 1109.5910, 1118.5838, 1140.6515, 1153.6950, 1163.6855, 1164.6754, 1165.6684, 1179.6771, 1184.6858, 1193.6977, 1195.6893, 1201.7343, 1229.8974, 1232.6901, 1253.7005, 1259.2801, 1259.7540, 1263.2247, 1263.7024, 1266.7035, 1277.7589, 1280.7521, 1283.7721, 1302.8009, 1306.7653, 1308.7528, 1310.3027, 1320.6798, 1323.2817, 1323.7637, 1324.7890, 1326.3207, 1332.7618, 1340.7775, 1343.7777, 1357.7890, 1365.7525, 1373.7532, 1390.8324, 1393.8069, 1407.7954, 1422.8033, 1434.8643, 1460.8550, 1475.8557, 1490.8367, 1493.8451, 1598.9377, 1638.9642, 1657.9317, 1684.0126, 1699.9639, 1707.9051, 1716.9715, 1740.9356, 1781.0033, 1789.0003, 1791.8887, 1804.0297, 1839.0630, 1847.0491, 1852.0436, 1983.1414, 1989.1250, 2001.0988, 2083.1533, 2128.1603, 2211.2706, 2215.3315, 2286.2807, 2299.3189, 2329.2726, 2343.2471, 2384.1325, 2399.2011, 2441.2881, 2501.4182, 2510.3224, 2705.3310, 2717.2530, 2848.5165, 2869.5420, 3223.3745, 3264.5742, 3312.3559

4. [Rsi\\_ECOL6](#) Mass: 61235 Score: 63 Expect: 0.18 Matches: 2

30S ribosomal protein S1 OS=Escherichia coli O6:H1 (strain CFT073 / ATCC 700928 / UPEC) OX=199310 GN=rpsA PE=3 SV=1

Table with 8 columns: Observed, Mr(expt), Mr(calc), ppm, Start, End, Miss, Ions, Peptide. Row 1: 1329.7326 1328.7254 1328.7664 -30.87 451 - 464 1 --- K.GAIVTGVKTAVDAK.G

1549.8969 1548.8896 1548.7784 71.8 465 - 479 0 63 K.GATVELADGVEGYLR.A
No match to: 720.3201, 721.3315, 724.3214, 804.3108, 842.5642, 865.5456, 870.5940, 881.3242, 969.5548, 973.5948, 982.5138, 1033.5958, 1037.6072, 1045.6282, 1047.6804, 1064.6488, 1072.6447, 1077.2496, 1082.6362, 1093.6181, 1107.6212, 1109.5910, 1118.5838, 1140.6515, 1153.6950, 1163.6855, 1164.6754, 1165.6684, 1179.6771, 1184.6858, 1193.6977, 1195.6893, 1201.7343, 1229.8974, 1232.6901, 1253.7005, 1259.2801, 1259.7540, 1263.2247, 1263.7024, 1266.7035, 1277.7589, 1280.7521, 1283.7721, 1302.8009, 1306.7653, 1308.7528, 1310.3027, 1320.6798, 1323.2817, 1323.7637, 1324.7890, 1326.3207, 1332.7618, 1340.7775, 1343.7777, 1357.7890, 1365.7525, 1373.7532, 1390.8324, 1393.8069, 1407.7954, 1422.8033, 1434.8643, 1460.8550, 1475.8557, 1490.8367, 1493.8451, 1598.9377, 1638.9642, 1657.9317, 1684.0126, 1699.9639, 1707.9051, 1716.9715, 1740.9356, 1781.0033, 1789.0003, 1791.8887, 1804.0297, 1839.0630, 1847.0491, 1852.0436, 1983.1414, 1989.1250, 2001.0988, 2083.1533, 2128.1603, 2211.2706, 2215.3315, 2286.2807, 2299.3189, 2329.2726, 2343.2471, 2384.1325, 2399.2011, 2441.2881, 2501.4182, 2510.3224, 2705.3310, 2717.2530, 2848.5165, 2869.5420, 3223.3745, 3264.5742, 3312.3559

5. [Rsi\\_ECOLI](#) Mass: 61235 Score: 63 Expect: 0.18 Matches: 2

30S ribosomal protein S1 OS=Escherichia coli (strain K12) OX=83333 GN=rpsA PE=1 SV=1

Table with 8 columns: Observed, Mr(expt), Mr(calc), ppm, Start, End, Miss, Ions, Peptide. Row 1: 1329.7326 1328.7254 1328.7664 -30.87 451 - 464 1 --- K.GAIVTGVKTAVDAK.G

1549.8969 1548.8896 1548.7784 71.8 465 - 479 0 63 K.GATVELADGVEGYLR.A
No match to: 720.3201, 721.3315, 724.3214, 804.3108, 842.5642, 865.5456, 870.5940, 881.3242, 969.5548, 973.5948, 982.5138, 1033.5958, 1037.6072, 1045.6282, 1047.6804, 1064.6488, 1072.6447, 1077.2496, 1082.6362, 1093.6181, 1107.6212, 1109.5910, 1118.5838, 1140.6515, 1153.6950, 1163.6855, 1164.6754, 1165.6684, 1179.6771, 1184.6858, 1193.6977, 1195.6893, 1201.7343, 1229.8974, 1232.6901, 1253.7005, 1259.2801, 1259.7540, 1263.2247, 1263.7024, 1266.7035, 1277.7589, 1280.7521, 1283.7721, 1302.8009, 1306.7653, 1308.7528, 1310.3027, 1320.6798, 1323.2817, 1323.7637, 1324.7890, 1326.3207, 1332.7618, 1340.7775, 1343.7777, 1357.7890, 1365.7525, 1373.7532, 1390.8324, 1393.8069, 1407.7954, 1422.8033, 1434.8643, 1460.8550, 1475.8557, 1490.8367, 1493.8451, 1598.9377, 1638.9642, 1657.9317, 1684.0126, 1699.9639, 1707.9051, 1716.9715, 1740.9356, 1781.0033, 1789.0003, 1791.8887, 1804.0297, 1839.0630, 1847.0491, 1852.0436, 1983.1414, 1989.1250, 2001.0988, 2083.1533, 2128.1603, 2211.2706, 2215.3315, 2286.2807, 2299.3189, 2329.2726, 2343.2471, 2384.1325, 2399.2011, 2441.2881, 2501.4182, 2510.3224, 2705.3310, 2717.2530, 2848.5165, 2869.5420, 3223.3745, 3264.5742, 3312.3559

6. [Rsi\\_SHIFL](#) Mass: 61235 Score: 63 Expect: 0.18 Matches: 2

30S ribosomal protein S1 OS=Shigella flexneri OX=623 GN=rpsA PE=3 SV=1

Table with 8 columns: Observed, Mr(expt), Mr(calc), ppm, Start, End, Miss, Ions, Peptide. Row 1: 1329.7326 1328.7254 1328.7664 -30.87 451 - 464 1 --- K.GAIVTGVKTAVDAK.G

1549.8969 1548.8896 1548.7784 71.8 465 - 479 0 63 K.GATVELADGVEGYLR.A
No match to: 720.3201, 721.3315, 724.3214, 804.3108, 842.5642, 865.5456, 870.5940, 881.3242, 969.5548, 973.5948, 982.5138, 1033.5958, 1037.6072, 1045.6282, 1047.6804, 1064.6488, 1072.6447, 1077.2496, 1082.6362, 1093.6181, 1107.6212, 1109.5910, 1118.5838, 1140.6515, 1153.6950, 1163.6855, 1164.6754, 1165.6684, 1179.6771, 1184.6858, 1193.6977, 1195.6893, 1201.7343, 1229.8974, 1232.6901, 1253.7005, 1259.2801, 1259.7540, 1263.2247, 1263.7024, 1266.7035, 1277.7589, 1280.7521, 1283.7721, 1302.8009, 1306.7653, 1308.7528, 1310.3027, 1320.6798, 1323.2817, 1323.7637, 1324.7890, 1326.3207, 1332.7618, 1340.7775, 1343.7777, 1357.7890, 1365.7525, 1373.7532, 1390.8324, 1393.8069, 1407.7954, 1422.8033, 1434.8643, 1460.8550, 1475.8557, 1490.8367, 1493.8451, 1598.9377, 1638.9642, 1657.9317, 1684.0126, 1699.9639, 1707.9051, 1716.9715, 1740.9356, 1781.0033, 1789.0003, 1791.8887, 1804.0297, 1839.0630, 1847.0491, 1852.0436, 1983.1414, 1989.1250, 2001.0988, 2083.1533, 2128.1603, 2211.2706, 2215.3315, 2286.2807, 2299.3189, 2329.2726, 2343.2471, 2384.1325, 2399.2011, 2441.2881, 2501.4182, 2510.3224, 2705.3310, 2717.2530, 2848.5165, 2869.5420, 3223.3745, 3264.5742, 3312.3559

7. [ATPG\\_BACCA](#) Mass: 32323 Score: 61 Expect: 0.27 Matches: 12

ATP synthase gamma chain OS=Bacillus caldodenax OX=1395 GN=atpG PE=3 SV=1

Table with 8 columns: Observed, Mr(expt), Mr(calc), ppm, Start, End, Miss, Ions, Peptide. Rows include: 1140.6515 1139.6442 1139.7026 -51.22 2 - 11 1 --- M.KPLASLRDIK.T; 1164.6754 1163.6681 1163.6008 57.8 42 - 50 0 --- R.EIVRPYMEK.I; 1266.7035 1265.6962 1265.6914 3.77 64 - 74 0 --- R.SHPLVSRPVK.K + Oxidation (M); 1320.6798 1319.6725 1319.7019 -22.31 41 - 50 1 --- K.REIVRPYMEK.I; 1332.7618 1331.7545 1331.6867 50.9 51 - 63 0 --- K.IQEVVAMSASAAR.S; 1343.7777 1342.7704 1342.7391 23.3 130 - 140 1 --- K.RNMPVILDITR.L + Oxidation (M); 1373.7532 1372.7459 1372.7602 -10.43 189 - 200 0 --- K.LLPLTDFLAENK.Q; 1657.9317 1656.9244 1656.9199 2.75 189 - 202 1 --- K.LLPLTDFLAENKQR.T; 1699.9639 1698.9566 1698.8941 36.8 141 - 155 1 --- R.LPDQPSFADIKEIAR.K; 1781.0033 1779.9960 1779.8243 96.5 243 - 258 1 --- R.MTAMKNTDNDNVIR.T + Oxidation (M); 2399.2011 2398.1938 2398.2566 -26.20 131 - 151 1 --- R.NMPVILDITR.LPDQPSFADIK.E + Oxidation (M); 2510.3224 2509.3151 2509.2668 19.2 42 - 63 1 --- R.EIVRPYMEKIQEVVAMSASAAR.S + 2 Oxidation (M)

No match to: 720.3201, 721.3315, 724.3214, 804.3108, 842.5642, 865.5456, 870.5940, 881.3242, 969.5548, 973.5948, 982.5138, 1033.5958, 1037.6072, 1045.6282, 1047.6804, 1064.6488, 1072.6447, 1077.2496, 1082.6362, 1093.6181, 1107.6212, 1109.5910, 1118.5838, 1153.6950, 1163.6855, 1165.6684, 1179.6771, 1184.6858, 1193.6977, 1195.6893, 1201.7343, 1229.8974, 1232.6901, 1253.7005, 1259.2801, 1259.7540, 1263.2247, 1263.7024, 1277.7589, 1280.7521, 1283.7721, 1302.8009, 1306.7653, 1308.7528, 1310.3027, 1323.2817, 1323.7637, 1324.7890, 1326.3207, 1329.7326, 1340.7775, 1357.7890, 1365.7525, 1390.8324, 1393.8069, 1407.7954, 1422.8033, 1434.8643, 1460.8550, 1475.8557, 1490.8367, 1493.8451, 1549.8969, 1598.9377, 1638.9642, 1684.0126, 1707.9051, 1716.9715, 1740.9356, 1789.0003, 1791.8887, 1804.0297, 1839.0630, 1847.0491, 1852.0436, 1983.1414, 1989.1250, 2001.0988, 2083.1533, 2128.1603, 2211.2706, 2215.3315, 2286.2807, 2299.3189, 2329.2726, 2343.2471, 2384.1325, 2399.2011, 2441.2881, 2501.4182, 2705.3310, 2717.2530, 2848.5165, 2869.5420, 3223.3745, 3264.5742, 3312.3559

8. [DXR\\_CLOBM](#) Mass: 43041 Score: 57 Expect: 0.73 Matches: 12

1-deoxy-D-xylulose 5-phosphate reductoisomerase OS=Clostridium botulinum (strain Loch Maree / Type A3) OX=498214 GN=dxr PE=3 SV=

| Observed                                                                                                                                                                                                                                                                                                                                                                                                                                                                                                                                                                                                                                                                                                                                                                                                                                                                                                                                                                                                                                                                                                 | Mr(expt)  | Mr(calc)  | ppm    | Start | End | Miss | Ions | Peptide                                           |
|----------------------------------------------------------------------------------------------------------------------------------------------------------------------------------------------------------------------------------------------------------------------------------------------------------------------------------------------------------------------------------------------------------------------------------------------------------------------------------------------------------------------------------------------------------------------------------------------------------------------------------------------------------------------------------------------------------------------------------------------------------------------------------------------------------------------------------------------------------------------------------------------------------------------------------------------------------------------------------------------------------------------------------------------------------------------------------------------------------|-----------|-----------|--------|-------|-----|------|------|---------------------------------------------------|
| 842.5642                                                                                                                                                                                                                                                                                                                                                                                                                                                                                                                                                                                                                                                                                                                                                                                                                                                                                                                                                                                                                                                                                                 | 841.5569  | 841.5637  | -8.05  | 41    | 47  | 1    | ---  | K.KVIEIIK.E                                       |
| 1193.6977                                                                                                                                                                                                                                                                                                                                                                                                                                                                                                                                                                                                                                                                                                                                                                                                                                                                                                                                                                                                                                                                                                | 1192.6904 | 1192.6815 | 7.46   | 30    | 40  | 1    | ---  | K.LVAISANKSYK.K                                   |
| 1320.6798                                                                                                                                                                                                                                                                                                                                                                                                                                                                                                                                                                                                                                                                                                                                                                                                                                                                                                                                                                                                                                                                                                | 1319.6725 | 1319.7119 | -29.82 | 207   | 218 | 1    | ---  | R.KISIDSATLMNK.G                                  |
| 1329.7326                                                                                                                                                                                                                                                                                                                                                                                                                                                                                                                                                                                                                                                                                                                                                                                                                                                                                                                                                                                                                                                                                                | 1328.7254 | 1328.7299 | -3.44  | 113   | 125 | 1    | ---  | K.AIESGKDIALANK.E                                 |
| 1343.7777                                                                                                                                                                                                                                                                                                                                                                                                                                                                                                                                                                                                                                                                                                                                                                                                                                                                                                                                                                                                                                                                                                | 1342.7704 | 1342.8224 | -38.72 | 42    | 52  | 1    | ---  | K.VIEIIKEFKPK.Y                                   |
| 1357.7890                                                                                                                                                                                                                                                                                                                                                                                                                                                                                                                                                                                                                                                                                                                                                                                                                                                                                                                                                                                                                                                                                                | 1356.7817 | 1356.7864 | -3.46  | 126   | 138 | 0    | ---  | K.ETLVVAGELVISK.A                                 |
| 1716.9715                                                                                                                                                                                                                                                                                                                                                                                                                                                                                                                                                                                                                                                                                                                                                                                                                                                                                                                                                                                                                                                                                                | 1715.9642 | 1715.9206 | 25.4   | 166   | 181 | 1    | ---  | K.EEVKNIIVTASGGPFR.G                              |
| 1852.0436                                                                                                                                                                                                                                                                                                                                                                                                                                                                                                                                                                                                                                                                                                                                                                                                                                                                                                                                                                                                                                                                                                | 1851.0364 | 1850.9713 | 35.2   | 238   | 253 | 0    | ---  | K.VVVHPQIVHSMVEYK.D                               |
| 2083.1533                                                                                                                                                                                                                                                                                                                                                                                                                                                                                                                                                                                                                                                                                                                                                                                                                                                                                                                                                                                                                                                                                                | 2082.1461 | 2082.1936 | -22.83 | 119   | 138 | 1    | ---  | K.DIALANKETLVVAGELVISK.A                          |
| 2128.1603                                                                                                                                                                                                                                                                                                                                                                                                                                                                                                                                                                                                                                                                                                                                                                                                                                                                                                                                                                                                                                                                                                | 2127.1531 | 2127.1398 | 6.23   | 318   | 338 | 0    | ---  | K.GGVMPAILNGANEVAVDLFLK.G                         |
| 2329.2726                                                                                                                                                                                                                                                                                                                                                                                                                                                                                                                                                                                                                                                                                                                                                                                                                                                                                                                                                                                                                                                                                                | 2328.2653 | 2328.2511 | 6.10   | 318   | 340 | 1    | ---  | K.GGVMPAILNGANEVAVDLFLKGI + Oxidation (M)         |
| 3312.3559                                                                                                                                                                                                                                                                                                                                                                                                                                                                                                                                                                                                                                                                                                                                                                                                                                                                                                                                                                                                                                                                                                | 3311.3486 | 3311.6353 | -86.54 | 238   | 267 | 1    | ---  | K.VVVHPQIVHSMVEYKDGSVIAQMATPDMK.L + Oxidation (M) |
| <b>No match to:</b> 720.3201, 721.3315, 724.3214, 804.3108, 865.5456, 870.5940, 881.3242, 969.5548, 973.5948, 982.5138, 1033.5958, 1037.6072, 1045.6282, 1047.6804, 1064.6488, 1072.6447, 1077.2496, 1082.6362, 1093.6181, 1107.6212, 1109.5910, 1118.5838, 1140.6515, 1153.6950, 1163.6855, 1164.6754, 1165.6684, 1179.6771, 1184.6858, 1195.6893, 1201.7343, 1229.8974, 1232.6901, 1253.7005, 1259.2801, 1259.7540, 1263.2247, 1263.7024, 1266.7035, 1277.7589, 1280.7521, 1283.7721, 1302.8009, 1306.7653, 1308.7528, 1310.3027, 1323.2817, 1323.7637, 1324.7890, 1326.3207, 1332.7618, 1340.7775, 1365.7525, 1373.7532, 1390.8324, 1393.8069, 1407.7954, 1422.8033, 1434.8643, 1460.8550, 1475.8557, 1490.8367, 1493.8451, 1549.8969, 1598.9377, 1638.9642, 1657.9317, 1684.0126, 1699.9639, 1707.9051, 1740.9356, 1781.0033, 1789.0003, 1791.8887, 1804.0297, 1839.0630, 1847.0491, 1983.1414, 1989.1250, 2001.0988, 2211.2706, 2215.3315, 2286.2807, 2299.3189, 2343.2471, 2384.1325, 2399.2011, 2441.2881, 2501.4182, 2510.3224, 2705.3310, 2717.2530, 2848.5165, 2869.5420, 3223.3745, 3264.5742 |           |           |        |       |     |      |      |                                                   |

9. [DXR\\_CLOB6](#) Mass: 43168 Score: 56 Expect: 0.94 Matches: 12

1-deoxy-D-xylulose 5-phosphate reductoisomerase OS=Clostridium botulinum (strain 657 / Type Ba4) OX=515621 GN=dxr PE=3 SV=1

| Observed                                                                                                                                                                                                                                                                                                                                                                                                                                                                                                                                                                                                                                                                                                                                                                                                                                                                                                                                                                                                                                                                                                 | Mr(expt)  | Mr(calc)  | ppm    | Start | End | Miss | Ions | Peptide                                           |
|----------------------------------------------------------------------------------------------------------------------------------------------------------------------------------------------------------------------------------------------------------------------------------------------------------------------------------------------------------------------------------------------------------------------------------------------------------------------------------------------------------------------------------------------------------------------------------------------------------------------------------------------------------------------------------------------------------------------------------------------------------------------------------------------------------------------------------------------------------------------------------------------------------------------------------------------------------------------------------------------------------------------------------------------------------------------------------------------------------|-----------|-----------|--------|-------|-----|------|------|---------------------------------------------------|
| 842.5642                                                                                                                                                                                                                                                                                                                                                                                                                                                                                                                                                                                                                                                                                                                                                                                                                                                                                                                                                                                                                                                                                                 | 841.5569  | 841.5637  | -8.05  | 41    | 47  | 1    | ---  | K.KVIEIIK.E                                       |
| 1193.6977                                                                                                                                                                                                                                                                                                                                                                                                                                                                                                                                                                                                                                                                                                                                                                                                                                                                                                                                                                                                                                                                                                | 1192.6904 | 1192.6815 | 7.46   | 30    | 40  | 1    | ---  | K.LVAISANKSYK.K                                   |
| 1320.6798                                                                                                                                                                                                                                                                                                                                                                                                                                                                                                                                                                                                                                                                                                                                                                                                                                                                                                                                                                                                                                                                                                | 1319.6725 | 1319.7119 | -29.82 | 207   | 218 | 1    | ---  | R.KISIDSATLMNK.G                                  |
| 1329.7326                                                                                                                                                                                                                                                                                                                                                                                                                                                                                                                                                                                                                                                                                                                                                                                                                                                                                                                                                                                                                                                                                                | 1328.7254 | 1328.7299 | -3.44  | 113   | 125 | 1    | ---  | K.AIESGKDIALANK.E                                 |
| 1343.7777                                                                                                                                                                                                                                                                                                                                                                                                                                                                                                                                                                                                                                                                                                                                                                                                                                                                                                                                                                                                                                                                                                | 1342.7704 | 1342.8224 | -38.72 | 42    | 52  | 1    | ---  | K.VIEIIKEFKPK.Y                                   |
| 1357.7890                                                                                                                                                                                                                                                                                                                                                                                                                                                                                                                                                                                                                                                                                                                                                                                                                                                                                                                                                                                                                                                                                                | 1356.7817 | 1356.7864 | -3.46  | 126   | 138 | 0    | ---  | K.ETLVVAGELVISK.A                                 |
| 1716.9715                                                                                                                                                                                                                                                                                                                                                                                                                                                                                                                                                                                                                                                                                                                                                                                                                                                                                                                                                                                                                                                                                                | 1715.9642 | 1715.9206 | 25.4   | 166   | 181 | 1    | ---  | K.EEVKNIIVTASGGPFR.G                              |
| 1852.0436                                                                                                                                                                                                                                                                                                                                                                                                                                                                                                                                                                                                                                                                                                                                                                                                                                                                                                                                                                                                                                                                                                | 1851.0364 | 1850.9713 | 35.2   | 238   | 253 | 0    | ---  | K.VVVHPQIVHSMVEYK.D                               |
| 2083.1533                                                                                                                                                                                                                                                                                                                                                                                                                                                                                                                                                                                                                                                                                                                                                                                                                                                                                                                                                                                                                                                                                                | 2082.1461 | 2082.1936 | -22.83 | 119   | 138 | 1    | ---  | K.DIALANKETLVVAGELVISK.A                          |
| 2128.1603                                                                                                                                                                                                                                                                                                                                                                                                                                                                                                                                                                                                                                                                                                                                                                                                                                                                                                                                                                                                                                                                                                | 2127.1531 | 2127.1398 | 6.23   | 318   | 338 | 0    | ---  | K.GGVMPAILNGANEVAVDLFLK.G                         |
| 2329.2726                                                                                                                                                                                                                                                                                                                                                                                                                                                                                                                                                                                                                                                                                                                                                                                                                                                                                                                                                                                                                                                                                                | 2328.2653 | 2328.2511 | 6.10   | 318   | 340 | 1    | ---  | K.GGVMPAILNGANEVAVDLFLKGI + Oxidation (M)         |
| 3312.3559                                                                                                                                                                                                                                                                                                                                                                                                                                                                                                                                                                                                                                                                                                                                                                                                                                                                                                                                                                                                                                                                                                | 3311.3486 | 3311.6353 | -86.54 | 238   | 267 | 1    | ---  | K.VVVHPQIVHSMVEYKDGSVIAQMATPDMK.L + Oxidation (M) |
| <b>No match to:</b> 720.3201, 721.3315, 724.3214, 804.3108, 865.5456, 870.5940, 881.3242, 969.5548, 973.5948, 982.5138, 1033.5958, 1037.6072, 1045.6282, 1047.6804, 1064.6488, 1072.6447, 1077.2496, 1082.6362, 1093.6181, 1107.6212, 1109.5910, 1118.5838, 1140.6515, 1153.6950, 1163.6855, 1164.6754, 1165.6684, 1179.6771, 1184.6858, 1195.6893, 1201.7343, 1229.8974, 1232.6901, 1253.7005, 1259.2801, 1259.7540, 1263.2247, 1263.7024, 1266.7035, 1277.7589, 1280.7521, 1283.7721, 1302.8009, 1306.7653, 1308.7528, 1310.3027, 1323.2817, 1323.7637, 1324.7890, 1326.3207, 1332.7618, 1340.7775, 1365.7525, 1373.7532, 1390.8324, 1393.8069, 1407.7954, 1422.8033, 1434.8643, 1460.8550, 1475.8557, 1490.8367, 1493.8451, 1549.8969, 1598.9377, 1638.9642, 1657.9317, 1684.0126, 1699.9639, 1707.9051, 1740.9356, 1781.0033, 1789.0003, 1791.8887, 1804.0297, 1839.0630, 1847.0491, 1983.1414, 1989.1250, 2001.0988, 2211.2706, 2215.3315, 2286.2807, 2299.3189, 2343.2471, 2384.1325, 2399.2011, 2441.2881, 2501.4182, 2510.3224, 2705.3310, 2717.2530, 2848.5165, 2869.5420, 3223.3745, 3264.5742 |           |           |        |       |     |      |      |                                                   |

10. [DXR\\_CLOBJ](#) Mass: 43182 Score: 56 Expect: 0.94 Matches: 12

1-deoxy-D-xylulose 5-phosphate reductoisomerase OS=Clostridium botulinum (strain Kyoto / Type A2) OX=536232 GN=dxr PE=3 SV=1

| Observed                                                                                                                                                                                                                                                                                                                                                                                                                                                                                                                                                                                                                                                                                                                                                                                                                                                                                                                                                                                                                                                                                                 | Mr(expt)  | Mr(calc)  | ppm    | Start | End | Miss | Ions | Peptide                                           |
|----------------------------------------------------------------------------------------------------------------------------------------------------------------------------------------------------------------------------------------------------------------------------------------------------------------------------------------------------------------------------------------------------------------------------------------------------------------------------------------------------------------------------------------------------------------------------------------------------------------------------------------------------------------------------------------------------------------------------------------------------------------------------------------------------------------------------------------------------------------------------------------------------------------------------------------------------------------------------------------------------------------------------------------------------------------------------------------------------------|-----------|-----------|--------|-------|-----|------|------|---------------------------------------------------|
| 842.5642                                                                                                                                                                                                                                                                                                                                                                                                                                                                                                                                                                                                                                                                                                                                                                                                                                                                                                                                                                                                                                                                                                 | 841.5569  | 841.5637  | -8.05  | 41    | 47  | 1    | ---  | K.KVIEIIK.E                                       |
| 1193.6977                                                                                                                                                                                                                                                                                                                                                                                                                                                                                                                                                                                                                                                                                                                                                                                                                                                                                                                                                                                                                                                                                                | 1192.6904 | 1192.6815 | 7.46   | 30    | 40  | 1    | ---  | K.LVAISANKSYK.K                                   |
| 1320.6798                                                                                                                                                                                                                                                                                                                                                                                                                                                                                                                                                                                                                                                                                                                                                                                                                                                                                                                                                                                                                                                                                                | 1319.6725 | 1319.7119 | -29.82 | 207   | 218 | 1    | ---  | R.KISIDSATLMNK.G                                  |
| 1329.7326                                                                                                                                                                                                                                                                                                                                                                                                                                                                                                                                                                                                                                                                                                                                                                                                                                                                                                                                                                                                                                                                                                | 1328.7254 | 1328.7299 | -3.44  | 113   | 125 | 1    | ---  | K.AIESGKDIALANK.E                                 |
| 1343.7777                                                                                                                                                                                                                                                                                                                                                                                                                                                                                                                                                                                                                                                                                                                                                                                                                                                                                                                                                                                                                                                                                                | 1342.7704 | 1342.8224 | -38.72 | 42    | 52  | 1    | ---  | K.VIEIIKEFKPK.Y                                   |
| 1357.7890                                                                                                                                                                                                                                                                                                                                                                                                                                                                                                                                                                                                                                                                                                                                                                                                                                                                                                                                                                                                                                                                                                | 1356.7817 | 1356.7864 | -3.46  | 126   | 138 | 0    | ---  | K.ETLVVAGELVISK.A                                 |
| 1716.9715                                                                                                                                                                                                                                                                                                                                                                                                                                                                                                                                                                                                                                                                                                                                                                                                                                                                                                                                                                                                                                                                                                | 1715.9642 | 1715.9206 | 25.4   | 166   | 181 | 1    | ---  | K.EEVKNIIVTASGGPFR.G                              |
| 1852.0436                                                                                                                                                                                                                                                                                                                                                                                                                                                                                                                                                                                                                                                                                                                                                                                                                                                                                                                                                                                                                                                                                                | 1851.0364 | 1850.9713 | 35.2   | 238   | 253 | 0    | ---  | K.VVVHPQIVHSMVEYK.D                               |
| 2083.1533                                                                                                                                                                                                                                                                                                                                                                                                                                                                                                                                                                                                                                                                                                                                                                                                                                                                                                                                                                                                                                                                                                | 2082.1461 | 2082.1936 | -22.83 | 119   | 138 | 1    | ---  | K.DIALANKETLVVAGELVISK.A                          |
| 2128.1603                                                                                                                                                                                                                                                                                                                                                                                                                                                                                                                                                                                                                                                                                                                                                                                                                                                                                                                                                                                                                                                                                                | 2127.1531 | 2127.1398 | 6.23   | 318   | 338 | 0    | ---  | K.GGVMPAILNGANEVAVDLFLK.G                         |
| 2329.2726                                                                                                                                                                                                                                                                                                                                                                                                                                                                                                                                                                                                                                                                                                                                                                                                                                                                                                                                                                                                                                                                                                | 2328.2653 | 2328.2511 | 6.10   | 318   | 340 | 1    | ---  | K.GGVMPAILNGANEVAVDLFLKGI + Oxidation (M)         |
| 3312.3559                                                                                                                                                                                                                                                                                                                                                                                                                                                                                                                                                                                                                                                                                                                                                                                                                                                                                                                                                                                                                                                                                                | 3311.3486 | 3311.6353 | -86.54 | 238   | 267 | 1    | ---  | K.VVVHPQIVHSMVEYKDGSVIAQMATPDMK.L + Oxidation (M) |
| <b>No match to:</b> 720.3201, 721.3315, 724.3214, 804.3108, 865.5456, 870.5940, 881.3242, 969.5548, 973.5948, 982.5138, 1033.5958, 1037.6072, 1045.6282, 1047.6804, 1064.6488, 1072.6447, 1077.2496, 1082.6362, 1093.6181, 1107.6212, 1109.5910, 1118.5838, 1140.6515, 1153.6950, 1163.6855, 1164.6754, 1165.6684, 1179.6771, 1184.6858, 1195.6893, 1201.7343, 1229.8974, 1232.6901, 1253.7005, 1259.2801, 1259.7540, 1263.2247, 1263.7024, 1266.7035, 1277.7589, 1280.7521, 1283.7721, 1302.8009, 1306.7653, 1308.7528, 1310.3027, 1323.2817, 1323.7637, 1324.7890, 1326.3207, 1332.7618, 1340.7775, 1365.7525, 1373.7532, 1390.8324, 1393.8069, 1407.7954, 1422.8033, 1434.8643, 1460.8550, 1475.8557, 1490.8367, 1493.8451, 1549.8969, 1598.9377, 1638.9642, 1657.9317, 1684.0126, 1699.9639, 1707.9051, 1740.9356, 1781.0033, 1789.0003, 1791.8887, 1804.0297, 1839.0630, 1847.0491, 1983.1414, 1989.1250, 2001.0988, 2211.2706, 2215.3315, 2286.2807, 2299.3189, 2343.2471, 2384.1325, 2399.2011, 2441.2881, 2501.4182, 2510.3224, 2705.3310, 2717.2530, 2848.5165, 2869.5420, 3223.3745, 3264.5742 |           |           |        |       |     |      |      |                                                   |

11. [DXR\\_CLOBL](#) Mass: 43212 Score: 56 Expect: 0.94 Matches: 12

1-deoxy-D-xylulose 5-phosphate reductoisomerase OS=Clostridium botulinum (strain Langeland / NCTC 10281 / Type F) OX=441772 GN=d

| Observed                                                                                                                                                                                                                                                                                                                                                                                                                                                                                                                                                                                                                               | Mr(expt)  | Mr(calc)  | ppm    | Start | End | Miss | Ions | Peptide                                           |
|----------------------------------------------------------------------------------------------------------------------------------------------------------------------------------------------------------------------------------------------------------------------------------------------------------------------------------------------------------------------------------------------------------------------------------------------------------------------------------------------------------------------------------------------------------------------------------------------------------------------------------------|-----------|-----------|--------|-------|-----|------|------|---------------------------------------------------|
| 842.5642                                                                                                                                                                                                                                                                                                                                                                                                                                                                                                                                                                                                                               | 841.5569  | 841.5637  | -8.05  | 41    | 47  | 1    | ---  | K.KVIEIIK.E                                       |
| 1193.6977                                                                                                                                                                                                                                                                                                                                                                                                                                                                                                                                                                                                                              | 1192.6904 | 1192.6815 | 7.46   | 30    | 40  | 1    | ---  | K.LVAISANKSYK.K                                   |
| 1320.6798                                                                                                                                                                                                                                                                                                                                                                                                                                                                                                                                                                                                                              | 1319.6725 | 1319.7119 | -29.82 | 207   | 218 | 1    | ---  | R.KISIDSATLMNK.G                                  |
| 1329.7326                                                                                                                                                                                                                                                                                                                                                                                                                                                                                                                                                                                                                              | 1328.7254 | 1328.7299 | -3.44  | 113   | 125 | 1    | ---  | K.AIESGKDIALANK.E                                 |
| 1343.7777                                                                                                                                                                                                                                                                                                                                                                                                                                                                                                                                                                                                                              | 1342.7704 | 1342.8224 | -38.72 | 42    | 52  | 1    | ---  | K.VIEIIKEFKPK.Y                                   |
| 1357.7890                                                                                                                                                                                                                                                                                                                                                                                                                                                                                                                                                                                                                              | 1356.7817 | 1356.7864 | -3.46  | 126   | 138 | 0    | ---  | K.ETLVVAGELVISK.A                                 |
| 1716.9715                                                                                                                                                                                                                                                                                                                                                                                                                                                                                                                                                                                                                              | 1715.9642 | 1715.9206 | 25.4   | 166   | 181 | 1    | ---  | K.EEVKNIIVTASGGPFR.G                              |
| 1852.0436                                                                                                                                                                                                                                                                                                                                                                                                                                                                                                                                                                                                                              | 1851.0364 | 1850.9713 | 35.2   | 238   | 253 | 0    | ---  | K.VVVHPQIVHSMVEYK.D                               |
| 2083.1533                                                                                                                                                                                                                                                                                                                                                                                                                                                                                                                                                                                                                              | 2082.1461 | 2082.1936 | -22.83 | 119   | 138 | 1    | ---  | K.DIALANKETLVVAGELVISK.A                          |
| 2128.1603                                                                                                                                                                                                                                                                                                                                                                                                                                                                                                                                                                                                                              | 2127.1531 | 2127.1398 | 6.23   | 318   | 338 | 0    | ---  | K.GGVMPAILNGANEVAVDLFLK.G                         |
| 2329.2726                                                                                                                                                                                                                                                                                                                                                                                                                                                                                                                                                                                                                              | 2328.2653 | 2328.2511 | 6.10   | 318   | 340 | 1    | ---  | K.GGVMPAILNGANEVAVDLFLKGI + Oxidation (M)         |
| 3312.3559                                                                                                                                                                                                                                                                                                                                                                                                                                                                                                                                                                                                                              | 3311.3486 | 3311.6353 | -86.54 | 238   | 267 | 1    | ---  | K.VVVHPQIVHSMVEYKDGSVIAQMATPDMK.L + Oxidation (M) |
| <b>No match to:</b> 720.3201, 721.3315, 724.3214, 804.3108, 865.5456, 870.5940, 881.3242, 969.5548, 973.5948, 982.5138, 1033.5958, 1037.6072, 1045.6282, 1047.6804, 1064.6488, 1072.6447, 1077.2496, 1082.6362, 1093.6181, 1107.6212, 1109.5910, 1118.5838, 1140.6515, 1153.6950, 1163.6855, 1164.6754, 1165.6684, 1179.6771, 1184.6858, 1195.6893, 1201.7343, 1229.8974, 1232.6901, 1253.7005, 1259.2801, 1259.7540, 1263.2247, 1263.7024, 1266.7035, 1277.7589, 1280.7521, 1283.7721, 1302.8009, 1306.7653, 1308.7528, 1310.3027, 1323.2817, 1323.7637, 1324.7890, 1326.3207, 1332.7618, 1340.7775, 1365.7525, 1373.7532, 1390.8324, |           |           |        |       |     |      |      |                                                   |

1393.8069, 1407.7954, 1422.8033, 1434.8643, 1460.8550, 1475.8557, 1490.8367, 1493.8451, 1549.8969, 1598.9377, 1638.9642, 1657.9317, 1684.0126, 1699.9639, 1707.9051, 1740.9356, 1781.0033, 1789.0003, 1791.8887, 1804.0297, 1839.0630, 1847.0491, 1983.1414, 1989.1250, 2001.0988, 2211.2706, 2215.3315, 2286.2807, 2299.3189, 2343.2471, 2384.1325, 2399.2011, 2441.2881, 2501.4182, 2510.3224, 2705.3310, 2717.2530, 2848.5165, 2869.5420, 3223.3745, 3264.5742

12. DXR\_CLOBK Mass: 43169 Score: 55 Expect: 1 Matches: 12
1-deoxy-D-xylulose 5-phosphate reductoisomerase OS=Clostridium botulinum (strain Okra / Type B1) OX=498213 GN=dxr PE=3 SV=1
Observed Mr(expt) Mr(calc) ppm Start End Miss Ions Peptide
842.5642 841.5569 841.5637 -8.05 41 - 47 1 --- K.KVIEIIEK.E
1193.6977 1192.6904 1192.6815 7.46 30 - 40 1 --- K.LVAISANKSYK.K
1320.6798 1319.6725 1319.7119 -29.82 207 - 218 1 --- R.KISIDSATLMNK.G
1329.7326 1328.7254 1328.7299 -3.44 113 - 125 1 --- K.AIESGKDIALANK.E
1343.7777 1342.7704 1342.8224 -38.72 42 - 52 1 --- K.VIEIIEKFKPK.Y
1357.7890 1356.7817 1356.7864 -3.46 126 - 138 0 --- K.ETLVVAGELVISK.A
1716.9715 1715.9642 1715.9206 25.4 166 - 181 1 --- K.EEVKNIIVTASGGPFR.G
1852.0436 1851.0364 1850.9713 35.2 238 - 253 0 --- K.VVVHPQSIHVSMVEYK.D
2083.1533 2082.1461 2082.1936 -22.83 119 - 138 1 --- K.DIALANKETLVVAGELVISK.A
2128.1603 2127.1531 2127.1398 6.23 318 - 338 0 --- K.GGVMPAILNGANEVAVDLFLK.G
2329.2726 2328.2653 2328.2511 6.10 318 - 340 1 --- K.GGVMPAILNGANEVAVDLFLK.G.I + Oxidation (M)
3312.3559 3311.3486 3311.6353 -86.54 238 - 267 1 --- K.VVVHPQSIHVSMVEYKDGSVIAQMATPDMK.L + Oxidation (M)
No match to: 720.3201, 721.3315, 724.3214, 804.3108, 865.5456, 870.5940, 881.3242, 969.5548, 973.5948, 982.5138, 1033.5958, 1037.6072, 1045.6282, 1047.6804, 1064.6488, 1072.6447, 1077.2496, 1082.6362, 1093.6181, 1107.6212, 1109.5910, 1118.5838, 1140.6515, 1153.6950, 1163.6855, 1164.6754, 1165.6684, 1179.6771, 1184.6858, 1193.6977, 1201.7343, 1229.8974, 1232.6901, 1253.7005, 1259.2801, 1259.7540, 1263.2247, 1263.7024, 1266.7035, 1277.7589, 1280.7521, 1283.7721, 1302.8009, 1306.7653, 1308.7528, 1310.3027, 1323.2817, 1323.7637, 1324.7890, 1326.3207, 1332.7618, 1340.7775, 1365.7525, 1373.7532, 1390.8324, 1393.8069, 1407.7954, 1422.8033, 1434.8643, 1460.8550, 1475.8557, 1490.8367, 1493.8451, 1549.8969, 1598.9377, 1638.9642, 1657.9317, 1684.0126, 1699.9639, 1707.9051, 1740.9356, 1781.0033, 1789.0003, 1791.8887, 1804.0297, 1839.0630, 1847.0491, 1983.1414, 1989.1250, 2001.0988, 2211.2706, 2215.3315, 2286.2807, 2299.3189, 2343.2471, 2384.1325, 2399.2011, 2441.2881, 2501.4182, 2510.3224, 2705.3310, 2717.2530, 2848.5165, 2869.5420, 3223.3745, 3264.5742

13. ERA\_LACH4 Mass: 34027 Score: 54 Expect: 1.2 Matches: 7
GTPase Era OS=Lactobacillus helveticus (strain DPC 4571) OX=405566 GN=era PE=3 SV=1
Observed Mr(expt) Mr(calc) ppm Start End Miss Ions Peptide
842.5642 841.5569 841.5385 21.8 242 - 250 1 --- K.GIIIGKGGK.M
1195.6893 1194.6821 1194.6608 17.8 261 - 270 1 --- R.KEIEHLLGEK.V
1232.6901 1231.6828 1231.6635 15.7 133 - 142 0 --- K.LLLIMDSYHK.L
1253.7005 1252.6932 1252.6485 35.7 22 - 32 0 --- K.STLMNLYVQK.V
1365.7525 1364.7453 1364.7466 -0.95 275 - 284 1 --- R.LWVKVQHNWR.S
1490.8367 1489.8294 1489.8140 10.3 103 - 115 1 --- K.GDQYIANLLKVEK.V
1549.8969 1548.8896 1548.8624 17.6 262 - 274 1 28 K.EIEHLLGEKVNLR.L
No match to: 720.3201, 721.3315, 724.3214, 804.3108, 865.5456, 870.5940, 881.3242, 969.5548, 973.5948, 982.5138, 1033.5958, 1037.6072, 1045.6282, 1047.6804, 1064.6488, 1072.6447, 1077.2496, 1082.6362, 1093.6181, 1107.6212, 1109.5910, 1118.5838, 1140.6515, 1153.6950, 1163.6855, 1164.6754, 1165.6684, 1179.6771, 1184.6858, 1193.6977, 1201.7343, 1229.8974, 1232.6901, 1253.7005, 1259.2801, 1259.7540, 1263.2247, 1263.7024, 1266.7035, 1277.7589, 1280.7521, 1283.7721, 1302.8009, 1306.7653, 1308.7528, 1310.3027, 1323.2817, 1323.7637, 1324.7890, 1326.3207, 1329.7326, 1332.7618, 1340.7775, 1343.7777, 1357.7890, 1373.7532, 1390.8324, 1393.8069, 1407.7954, 1422.8033, 1434.8643, 1460.8550, 1475.8557, 1493.8451, 1598.9377, 1638.9642, 1657.9317, 1684.0126, 1699.9639, 1707.9051, 1716.9715, 1740.9356, 1781.0033, 1789.0003, 1791.8887, 1804.0297, 1839.0630, 1847.0491, 1852.0436, 1983.1414, 1989.1250, 2001.0988, 2083.1533, 2128.1603, 2211.2706, 2215.3315, 2286.2807, 2299.3189, 2343.2471, 2384.1325, 2399.2011, 2441.2881, 2501.4182, 2510.3224, 2705.3310, 2717.2530, 2848.5165, 2869.5420, 3223.3745, 3264.5742, 3312.3559

14. ASSY\_SOLUE Mass: 50458 Score: 54 Expect: 1.4 Matches: 11
Argininosuccinate synthase OS=Solibacter usitatus (strain Ellin6076) OX=234267 GN=argG PE=3 SV=1
Observed Mr(expt) Mr(calc) ppm Start End Miss Ions Peptide
1153.6950 1152.6877 1152.6139 64.0 206 - 215 1 --- K.DLEHLDKGVK.I
1253.7005 1252.6932 1252.6775 12.5 2 - 13 0 --- M.GNILQNLPAGEK.V
1266.7035 1265.6962 1265.6723 18.9 108 - 119 0 --- R.AVTGTMVLVIAMK.E + 2 Oxidation (M)
1324.7890 1323.7817 1323.6531 97.2 271 - 282 0 --- R.HGLGVSDQIENR.R
1343.7777 1342.7704 1342.7569 10.1 355 - 366 1 --- R.AITGEVTVELRR.G
1357.7890 1356.7817 1356.7224 43.7 216 - 227 0 --- K.IVEPIMGVSWR.E
1373.7532 1372.7459 1372.7173 20.8 216 - 227 0 --- K.IVEPIMGVSWR.E + Oxidation (M)
1657.9317 1656.9244 1656.9021 13.4 213 - 227 1 --- K.GVKIVEPIMGVSWR.E + Oxidation (M)
1699.9639 1698.9566 1698.9417 8.76 351 - 365 1 --- R.WVARAITGEVTVELR.R
1989.1250 1988.1177 1987.9938 62.3 14 - 32 0 10 K.VGLAFSGGLDTSAAIHWMR.A
3223.3745 3222.3672 3222.6608 -91.10 2 - 32 1 --- M.GNILQNLPAGEKVLAFSGGLDTSAAIHWMR.A
No match to: 720.3201, 721.3315, 724.3214, 804.3108, 842.5642, 865.5456, 870.5940, 881.3242, 969.5548, 973.5948, 982.5138, 1033.5958, 1037.6072, 1045.6282, 1047.6804, 1064.6488, 1072.6447, 1077.2496, 1082.6362, 1093.6181, 1107.6212, 1109.5910, 1118.5838, 1140.6515, 1153.6950, 1163.6855, 1164.6754, 1165.6684, 1179.6771, 1184.6858, 1193.6977, 1195.6893, 1201.7343, 1229.8974, 1232.6901, 1253.7005, 1259.2801, 1259.7540, 1263.2247, 1263.7024, 1266.7035, 1277.7589, 1280.7521, 1283.7721, 1302.8009, 1306.7653, 1308.7528, 1310.3027, 1320.6798, 1323.2817, 1323.7637, 1323.7637, 1326.3207, 1329.7326, 1332.7618, 1340.7775, 1365.7525, 1390.8324, 1393.8069, 1407.7954, 1422.8033, 1434.8643, 1460.8550, 1475.8557, 1490.8367, 1493.8451, 1549.8969, 1598.9377, 1638.9642, 1684.0126, 1707.9051, 1716.9715, 1740.9356, 1781.0033, 1789.0003, 1791.8887, 1804.0297, 1839.0630, 1847.0491, 1852.0436, 1983.1414, 1989.1250, 2001.0988, 2083.1533, 2128.1603, 2211.2706, 2215.3315, 2286.2807, 2299.3189, 2329.2726, 2343.2471, 2384.1325, 2399.2011, 2441.2881, 2501.4182, 2510.3224, 2705.3310, 2717.2530, 2848.5165, 2869.5420, 3264.5742, 3312.3559

15. IOLG\_RUBXD Mass: 37446 Score: 54 Expect: 1.5 Matches: 5
Inositol 2-dehydrogenase OS=Rubrobacter xylanophilus (strain DSM 9941 / NBRC 16129) OX=266117 GN=iolG PE=3 SV=1
Observed Mr(expt) Mr(calc) ppm Start End Miss Ions Peptide
1072.6447 1071.6374 1071.5924 42.0 35 - 44 0 --- R.LVAVADLDTR.R
1093.6181 1092.6108 1092.6114 -0.50 122 - 130 1 --- R.KLVQVGFMR.R + Oxidation (M)
1393.8069 1392.7996 1392.8089 -6.69 249 - 262 0 --- R.GTVQVPLPSGAIVR.R
1549.8969 1548.8896 1548.9100 -13.16 249 - 263 1 38 R.GTVQVPLPSGAIVR.R
1740.9356 1739.9283 1739.8406 50.4 186 - 198 0 --- R.WFIEEIEEVYVR.G
No match to: 720.3201, 721.3315, 724.3214, 804.3108, 842.5642, 865.5456, 870.5940, 881.3242, 969.5548, 973.5948, 982.5138, 1033.5958, 1037.6072, 1045.6282, 1047.6804, 1064.6488, 1072.6447, 1077.2496, 1082.6362, 1107.6212, 1109.5910, 1118.5838, 1140.6515, 1153.6950, 1163.6855, 1164.6754, 1165.6684, 1179.6771, 1184.6858, 1193.6977, 1195.6893, 1201.7343, 1229.8974, 1232.6901, 1253.7005, 1259.2801, 1259.7540, 1263.2247, 1263.7024, 1266.7035, 1277.7589, 1280.7521, 1283.7721, 1302.8009, 1306.7653, 1308.7528, 1310.3027, 1320.6798, 1323.2817, 1323.7637, 1324.7890, 1326.3207, 1329.7326, 1332.7618, 1340.7775, 1343.7777, 1357.7890, 1365.7525, 1373.7532, 1390.8324, 1407.7954, 1422.8033, 1434.8643, 1460.8550, 1475.8557, 1490.8367, 1493.8451, 1549.8969, 1598.9377, 1638.9642, 1657.9317, 1684.0126, 1699.9639, 1707.9051, 1716.9715, 1781.0033, 1789.0003, 1791.8887, 1804.0297, 1839.0630, 1847.0491, 1852.0436, 1983.1414, 1989.1250, 2001.0988, 2083.1533, 2128.1603, 2211.2706, 2215.3315, 2286.2807, 2299.3189, 2329.2726, 2343.2471, 2384.1325, 2399.2011, 2441.2881, 2501.4182, 2510.3224, 2705.3310, 2717.2530, 2848.5165, 2869.5420, 3223.3745, 3264.5742, 3312.3559

16. UREG\_RHOPB Mass: 22253 Score: 53 Expect: 1.5 Matches: 6
Urease accessory protein UreG OS=Rhodospirillum rubrum (strain BisB18) OX=316056 GN=ureG PE=3 SV=1

| Observed                                                                                                                                                                                                                                                                                                                                                                                                                                                                                                                                                                                                                                                                                                                                                                                                                                                                                                                                                                                                                                                                                                                                                                   | Mr (expt) | Mr (calc) | ppm    | Start | End | Miss | Ions | Peptide                                     |
|----------------------------------------------------------------------------------------------------------------------------------------------------------------------------------------------------------------------------------------------------------------------------------------------------------------------------------------------------------------------------------------------------------------------------------------------------------------------------------------------------------------------------------------------------------------------------------------------------------------------------------------------------------------------------------------------------------------------------------------------------------------------------------------------------------------------------------------------------------------------------------------------------------------------------------------------------------------------------------------------------------------------------------------------------------------------------------------------------------------------------------------------------------------------------|-----------|-----------|--------|-------|-----|------|------|---------------------------------------------|
| 721.3315                                                                                                                                                                                                                                                                                                                                                                                                                                                                                                                                                                                                                                                                                                                                                                                                                                                                                                                                                                                                                                                                                                                                                                   | 720.3242  | 720.3476  | -32.50 | 166   | -   | 171  | 0    | --- K.MQIDAK.R + Oxidation (M)              |
| 1064.6488                                                                                                                                                                                                                                                                                                                                                                                                                                                                                                                                                                                                                                                                                                                                                                                                                                                                                                                                                                                                                                                                                                                                                                  | 1063.6415 | 1063.5406 | 94.9   | 21    | -   | 29   | 0    | --- K.TALMDLLCK.T                           |
| 1082.6362                                                                                                                                                                                                                                                                                                                                                                                                                                                                                                                                                                                                                                                                                                                                                                                                                                                                                                                                                                                                                                                                                                                                                                  | 1081.6289 | 1081.6244 | 4.19   | 134   | -   | 144  | 1    | --- K.IPSKGGPGITR.S                         |
| 1259.7540                                                                                                                                                                                                                                                                                                                                                                                                                                                                                                                                                                                                                                                                                                                                                                                                                                                                                                                                                                                                                                                                                                                                                                  | 1258.7467 | 1258.7397 | 5.52   | 193   | -   | 204  | 1    | --- R.IVGFIEAKGGLR.A                        |
| 1434.8643                                                                                                                                                                                                                                                                                                                                                                                                                                                                                                                                                                                                                                                                                                                                                                                                                                                                                                                                                                                                                                                                                                                                                                  | 1433.8570 | 1433.7734 | 58.3   | 21    | -   | 32   | 1    | --- K.TALMDLLCKTLR.D                        |
| 1989.1250                                                                                                                                                                                                                                                                                                                                                                                                                                                                                                                                                                                                                                                                                                                                                                                                                                                                                                                                                                                                                                                                                                                                                                  | 1988.1177 | 1988.0435 | 37.3   | 10    | -   | 29   | 1    | 23 R.VVGIGFVGSKGTALMDLLCK.T + Oxidation (M) |
| <b>No match to:</b> 720.3201, 724.3214, 804.3108, 842.5642, 865.5456, 870.5940, 881.3242, 969.5548, 973.5948, 982.5138, 1033.5958, 1037.6072, 1045.6282, 1047.6804, 1072.6447, 1077.2496, 1093.6181, 1107.6212, 1109.5910, 1118.5838, 1140.6515, 1153.6950, 1163.6855, 1164.6754, 1165.6684, 1179.6771, 1184.6858, 1193.6977, 1195.6893, 1201.7343, 1229.8974, 1232.6901, 1253.7005, 1259.2801, 1263.2247, 1263.7024, 1266.7035, 1277.7589, 1280.7521, 1283.7721, 1302.8009, 1306.7653, 1308.7528, 1310.3027, 1320.6798, 1323.2817, 1323.7637, 1324.7890, 1326.3207, 1329.7326, 1332.7618, 1340.7775, 1343.7777, 1357.7890, 1365.7525, 1373.7532, 1390.8324, 1393.8069, 1407.7954, 1422.8033, 1460.8550, 1475.8557, 1490.8367, 1493.8451, 1549.8969, 1598.9377, 1638.9642, 1657.9317, 1684.0126, 1699.9639, 1707.9051, 1716.9715, 1740.9356, 1781.0033, 1789.0003, 1791.8887, 1804.0297, 1839.0630, 1847.0491, 1852.0436, 1983.1414, 2001.0988, 2083.1533, 2128.1603, 2211.2706, 2215.3315, 2286.2807, 2299.3189, 2329.2726, 2343.2471, 2384.1325, 2399.2011, 2441.2881, 2501.4182, 2510.3224, 2705.3310, 2717.2530, 2848.5165, 2869.5420, 3223.3745, 3264.5742, 3312.3559 |           |           |        |       |     |      |      |                                             |
| 17. <a href="#">CCPA STAEQ</a> Mass: 36500 Score: 53 Expect: 1.8 Matches: 10                                                                                                                                                                                                                                                                                                                                                                                                                                                                                                                                                                                                                                                                                                                                                                                                                                                                                                                                                                                                                                                                                               |           |           |        |       |     |      |      |                                             |
| Catabolite control protein A OS=Staphylococcus epidermidis (strain ATCC 35984 / RP62A) OX=176279 GN=ccpa PE=3 SV=1                                                                                                                                                                                                                                                                                                                                                                                                                                                                                                                                                                                                                                                                                                                                                                                                                                                                                                                                                                                                                                                         |           |           |        |       |     |      |      |                                             |
| Observed                                                                                                                                                                                                                                                                                                                                                                                                                                                                                                                                                                                                                                                                                                                                                                                                                                                                                                                                                                                                                                                                                                                                                                   | Mr (expt) | Mr (calc) | ppm    | Start | End | Miss | Ions | Peptide                                     |
| 1037.6072                                                                                                                                                                                                                                                                                                                                                                                                                                                                                                                                                                                                                                                                                                                                                                                                                                                                                                                                                                                                                                                                                                                                                                  | 1036.5999 | 1036.5553 | 43.0   | 2     | -   | 10   | 0    | --- M.TVTIYDVAR.E                           |
| 1140.6515                                                                                                                                                                                                                                                                                                                                                                                                                                                                                                                                                                                                                                                                                                                                                                                                                                                                                                                                                                                                                                                                                                                                                                  | 1139.6442 | 1139.5532 | 79.9   | 81    | -   | 90   | 0    | --- R.GLEDIATMYK.Y                          |
| 1184.6858                                                                                                                                                                                                                                                                                                                                                                                                                                                                                                                                                                                                                                                                                                                                                                                                                                                                                                                                                                                                                                                                                                                                                                  | 1183.6785 | 1183.5907 | 74.2   | 1     | -   | 10   | 0    | --- -.MTVTIYDVAR.E + Oxidation (M)          |
| 1329.7326                                                                                                                                                                                                                                                                                                                                                                                                                                                                                                                                                                                                                                                                                                                                                                                                                                                                                                                                                                                                                                                                                                                                                                  | 1328.7254 | 1328.7425 | -12.91 | 43    | -   | 53   | 1    | --- K.RLNYRPNVAR.G                          |
| 1373.7532                                                                                                                                                                                                                                                                                                                                                                                                                                                                                                                                                                                                                                                                                                                                                                                                                                                                                                                                                                                                                                                                                                                                                                  | 1372.7459 | 1372.6623 | 60.9   | 151   | -   | 162  | 0    | --- K.DDHIASVNIIDFK.Q                       |
| 1393.8069                                                                                                                                                                                                                                                                                                                                                                                                                                                                                                                                                                                                                                                                                                                                                                                                                                                                                                                                                                                                                                                                                                                                                                  | 1392.7996 | 1392.7361 | 45.6   | 2     | -   | 13   | 1    | --- M.TVTIYDVAREAR.V                        |
| 1493.8451                                                                                                                                                                                                                                                                                                                                                                                                                                                                                                                                                                                                                                                                                                                                                                                                                                                                                                                                                                                                                                                                                                                                                                  | 1492.8378 | 1492.7409 | 64.9   | 163   | -   | 175  | 0    | --- K.QAAEEATQYLIEK.G                       |
| 2083.1533                                                                                                                                                                                                                                                                                                                                                                                                                                                                                                                                                                                                                                                                                                                                                                                                                                                                                                                                                                                                                                                                                                                                                                  | 2082.1461 | 2081.9840 | 77.8   | 305   | -   | 321  | 0    | --- K.YMNDEIEENPNVILPHR.I                   |
| 2286.2807                                                                                                                                                                                                                                                                                                                                                                                                                                                                                                                                                                                                                                                                                                                                                                                                                                                                                                                                                                                                                                                                                                                                                                  | 2285.2734 | 2285.1910 | 36.1   | 14    | -   | 34   | 1    | --- R.VSMATVSRVNVGNQNVKPETR.N               |
| 2848.5165                                                                                                                                                                                                                                                                                                                                                                                                                                                                                                                                                                                                                                                                                                                                                                                                                                                                                                                                                                                                                                                                                                                                                                  | 2847.5092 | 2847.3926 | 40.9   | 151   | -   | 175  | 1    | --- K.DDHIASVNIIDFKQAAEEATQYLIEK.G          |
| <b>No match to:</b> 720.3201, 721.3315, 724.3214, 804.3108, 842.5642, 865.5456, 870.5940, 881.3242, 969.5548, 973.5948, 982.5138, 1033.5958, 1045.6282, 1047.6804, 1064.6488, 1072.6447, 1077.2496, 1082.6362, 1093.6181, 1107.6212, 1109.5910, 1118.5838, 1153.6950, 1163.6855, 1164.6754, 1165.6684, 1179.6771, 1193.6977, 1195.6893, 1201.7343, 1229.8974, 1232.6901, 1253.7005, 1259.2801, 1263.2247, 1263.7024, 1266.7035, 1277.7589, 1280.7521, 1283.7721, 1302.8009, 1306.7653, 1308.7528, 1310.3027, 1320.6798, 1323.2817, 1323.7637, 1324.7890, 1326.3207, 1332.7618, 1340.7775, 1343.7777, 1357.7890, 1365.7525, 1390.8324, 1407.7954, 1422.8033, 1434.8643, 1460.8550, 1475.8557, 1490.8367, 1493.8451, 1549.8969, 1598.9377, 1638.9642, 1657.9317, 1684.0126, 1699.9639, 1707.9051, 1716.9715, 1740.9356, 1781.0033, 1789.0003, 1791.8887, 1804.0297, 1839.0630, 1847.0491, 1852.0436, 1983.1414, 1989.1250, 2001.0988, 2128.1603, 2211.2706, 2215.3315, 2299.3189, 2329.2726, 2343.2471, 2384.1325, 2399.2011, 2441.2881, 2501.4182, 2510.3224, 2705.3310, 2717.2530, 2869.5420, 3223.3745, 3264.5742, 3312.3559                                              |           |           |        |       |     |      |      |                                             |
| 18. <a href="#">CCPA STAES</a> Mass: 36500 Score: 53 Expect: 1.8 Matches: 10                                                                                                                                                                                                                                                                                                                                                                                                                                                                                                                                                                                                                                                                                                                                                                                                                                                                                                                                                                                                                                                                                               |           |           |        |       |     |      |      |                                             |
| Catabolite control protein A OS=Staphylococcus epidermidis (strain ATCC 12228) OX=176280 GN=ccpa PE=3 SV=2                                                                                                                                                                                                                                                                                                                                                                                                                                                                                                                                                                                                                                                                                                                                                                                                                                                                                                                                                                                                                                                                 |           |           |        |       |     |      |      |                                             |
| Observed                                                                                                                                                                                                                                                                                                                                                                                                                                                                                                                                                                                                                                                                                                                                                                                                                                                                                                                                                                                                                                                                                                                                                                   | Mr (expt) | Mr (calc) | ppm    | Start | End | Miss | Ions | Peptide                                     |
| 1037.6072                                                                                                                                                                                                                                                                                                                                                                                                                                                                                                                                                                                                                                                                                                                                                                                                                                                                                                                                                                                                                                                                                                                                                                  | 1036.5999 | 1036.5553 | 43.0   | 2     | -   | 10   | 0    | --- M.TVTIYDVAR.E                           |
| 1140.6515                                                                                                                                                                                                                                                                                                                                                                                                                                                                                                                                                                                                                                                                                                                                                                                                                                                                                                                                                                                                                                                                                                                                                                  | 1139.6442 | 1139.5532 | 79.9   | 81    | -   | 90   | 0    | --- R.GLEDIATMYK.Y                          |
| 1184.6858                                                                                                                                                                                                                                                                                                                                                                                                                                                                                                                                                                                                                                                                                                                                                                                                                                                                                                                                                                                                                                                                                                                                                                  | 1183.6785 | 1183.5907 | 74.2   | 1     | -   | 10   | 0    | --- -.MTVTIYDVAR.E + Oxidation (M)          |
| 1329.7326                                                                                                                                                                                                                                                                                                                                                                                                                                                                                                                                                                                                                                                                                                                                                                                                                                                                                                                                                                                                                                                                                                                                                                  | 1328.7254 | 1328.7425 | -12.91 | 43    | -   | 53   | 1    | --- K.RLNYRPNVAR.G                          |
| 1373.7532                                                                                                                                                                                                                                                                                                                                                                                                                                                                                                                                                                                                                                                                                                                                                                                                                                                                                                                                                                                                                                                                                                                                                                  | 1372.7459 | 1372.6623 | 60.9   | 151   | -   | 162  | 0    | --- K.DDHIASVNIIDFK.Q                       |
| 1393.8069                                                                                                                                                                                                                                                                                                                                                                                                                                                                                                                                                                                                                                                                                                                                                                                                                                                                                                                                                                                                                                                                                                                                                                  | 1392.7996 | 1392.7361 | 45.6   | 2     | -   | 13   | 1    | --- M.TVTIYDVAREAR.V                        |
| 1493.8451                                                                                                                                                                                                                                                                                                                                                                                                                                                                                                                                                                                                                                                                                                                                                                                                                                                                                                                                                                                                                                                                                                                                                                  | 1492.8378 | 1492.7409 | 64.9   | 163   | -   | 175  | 0    | --- K.QAAEEATQYLIEK.G                       |
| 2083.1533                                                                                                                                                                                                                                                                                                                                                                                                                                                                                                                                                                                                                                                                                                                                                                                                                                                                                                                                                                                                                                                                                                                                                                  | 2082.1461 | 2081.9840 | 77.8   | 305   | -   | 321  | 0    | --- K.YMNDEIEENPNVILPHR.I                   |
| 2286.2807                                                                                                                                                                                                                                                                                                                                                                                                                                                                                                                                                                                                                                                                                                                                                                                                                                                                                                                                                                                                                                                                                                                                                                  | 2285.2734 | 2285.1910 | 36.1   | 14    | -   | 34   | 1    | --- R.VSMATVSRVNVGNQNVKPETR.N               |
| 2848.5165                                                                                                                                                                                                                                                                                                                                                                                                                                                                                                                                                                                                                                                                                                                                                                                                                                                                                                                                                                                                                                                                                                                                                                  | 2847.5092 | 2847.3926 | 40.9   | 151   | -   | 175  | 1    | --- K.DDHIASVNIIDFKQAAEEATQYLIEK.G          |
| <b>No match to:</b> 720.3201, 721.3315, 724.3214, 804.3108, 842.5642, 865.5456, 870.5940, 881.3242, 969.5548, 973.5948, 982.5138, 1033.5958, 1045.6282, 1047.6804, 1064.6488, 1072.6447, 1077.2496, 1082.6362, 1093.6181, 1107.6212, 1109.5910, 1118.5838, 1153.6950, 1163.6855, 1164.6754, 1165.6684, 1179.6771, 1193.6977, 1195.6893, 1201.7343, 1229.8974, 1232.6901, 1253.7005, 1259.2801, 1263.2247, 1263.7024, 1266.7035, 1277.7589, 1280.7521, 1283.7721, 1302.8009, 1306.7653, 1308.7528, 1310.3027, 1320.6798, 1323.2817, 1323.7637, 1324.7890, 1326.3207, 1332.7618, 1340.7775, 1343.7777, 1357.7890, 1365.7525, 1390.8324, 1407.7954, 1422.8033, 1434.8643, 1460.8550, 1475.8557, 1490.8367, 1493.8451, 1549.8969, 1598.9377, 1638.9642, 1657.9317, 1684.0126, 1699.9639, 1707.9051, 1716.9715, 1740.9356, 1781.0033, 1789.0003, 1791.8887, 1804.0297, 1839.0630, 1847.0491, 1852.0436, 1983.1414, 1989.1250, 2001.0988, 2128.1603, 2211.2706, 2215.3315, 2299.3189, 2329.2726, 2343.2471, 2384.1325, 2399.2011, 2441.2881, 2501.4182, 2510.3224, 2705.3310, 2717.2530, 2869.5420, 3223.3745, 3264.5742, 3312.3559                                              |           |           |        |       |     |      |      |                                             |
| 19. <a href="#">ACKA PORG3</a> Mass: 43586 Score: 52 Expect: 2 Matches: 10                                                                                                                                                                                                                                                                                                                                                                                                                                                                                                                                                                                                                                                                                                                                                                                                                                                                                                                                                                                                                                                                                                 |           |           |        |       |     |      |      |                                             |
| Acetate kinase OS=Porphyromonas gingivalis (strain ATCC 33277 / DSM 20709 / CIP 103683 / JCM 12257 / NCTC 11834 / 2561) OX=43194                                                                                                                                                                                                                                                                                                                                                                                                                                                                                                                                                                                                                                                                                                                                                                                                                                                                                                                                                                                                                                           |           |           |        |       |     |      |      |                                             |
| Observed                                                                                                                                                                                                                                                                                                                                                                                                                                                                                                                                                                                                                                                                                                                                                                                                                                                                                                                                                                                                                                                                                                                                                                   | Mr (expt) | Mr (calc) | ppm    | Start | End | Miss | Ions | Peptide                                     |
| 721.3315                                                                                                                                                                                                                                                                                                                                                                                                                                                                                                                                                                                                                                                                                                                                                                                                                                                                                                                                                                                                                                                                                                                                                                   | 720.3242  | 720.3225  | 2.41   | 358   | -   | 363  | 0    | --- K.VNEGMR.G + Oxidation (M)              |
| 1037.6072                                                                                                                                                                                                                                                                                                                                                                                                                                                                                                                                                                                                                                                                                                                                                                                                                                                                                                                                                                                                                                                                                                                                                                  | 1036.5999 | 1036.5627 | 35.9   | 15    | -   | 22   | 1    | --- K.YKLEMPK.G + Oxidation (M)             |
| 1072.6447                                                                                                                                                                                                                                                                                                                                                                                                                                                                                                                                                                                                                                                                                                                                                                                                                                                                                                                                                                                                                                                                                                                                                                  | 1071.6374 | 1071.5560 | 75.9   | 23    | -   | 33   | 0    | --- K.GDVLQAQGGVEK.L                        |
| 1163.6855                                                                                                                                                                                                                                                                                                                                                                                                                                                                                                                                                                                                                                                                                                                                                                                                                                                                                                                                                                                                                                                                                                                                                                  | 1162.6783 | 1162.5903 | 75.6   | 366   | -   | 375  | 0    | --- K.EMVISKPEK.V + Oxidation (M)           |
| 1332.7618                                                                                                                                                                                                                                                                                                                                                                                                                                                                                                                                                                                                                                                                                                                                                                                                                                                                                                                                                                                                                                                                                                                                                                  | 1331.7545 | 1331.7119 | 32.0   | 364   | -   | 375  | 1    | --- R.GKEMVISKPEK.V                         |
| 1390.8324                                                                                                                                                                                                                                                                                                                                                                                                                                                                                                                                                                                                                                                                                                                                                                                                                                                                                                                                                                                                                                                                                                                                                                  | 1389.8251 | 1389.7650 | 43.3   | 2     | -   | 14   | 1    | --- M.KVLVLNCGSSSVK.Y                       |
| 1460.8550                                                                                                                                                                                                                                                                                                                                                                                                                                                                                                                                                                                                                                                                                                                                                                                                                                                                                                                                                                                                                                                                                                                                                                  | 1459.8477 | 1459.7995 | 33.0   | 271   | -   | 285  | 1    | --- K.KSGVLGSGVSSDLR.E                      |
| 1549.8969                                                                                                                                                                                                                                                                                                                                                                                                                                                                                                                                                                                                                                                                                                                                                                                                                                                                                                                                                                                                                                                                                                                                                                  | 1548.8896 | 1548.8987 | -5.88  | 204   | -   | 219  | 0    | 14 R.IITAHIGNGASIAAIK.N                     |
| 2510.3224                                                                                                                                                                                                                                                                                                                                                                                                                                                                                                                                                                                                                                                                                                                                                                                                                                                                                                                                                                                                                                                                                                                                                                  | 2509.3151 | 2509.3866 | -28.49 | 51    | -   | 72   | 1    | --- K.VVLEKDMPEHTIAVEFILSVLK.D              |
| 3223.3745                                                                                                                                                                                                                                                                                                                                                                                                                                                                                                                                                                                                                                                                                                                                                                                                                                                                                                                                                                                                                                                                                                                                                                  | 3222.3672 | 3222.5656 | -61.56 | 312   | -   | 342  | 1    | --- K.YVGAYAAAMGVDVLFVTGGVGENQYTTREK.V      |
| <b>No match to:</b> 720.3201, 724.3214, 804.3108, 842.5642, 865.5456, 870.5940, 881.3242, 969.5548, 973.5948, 982.5138, 1033.5958, 1045.6282, 1047.6804, 1064.6488, 1072.6447, 1077.2496, 1082.6362, 1093.6181, 1107.6212, 1109.5910, 1118.5838, 1140.6515, 1153.6950, 1163.6855, 1164.6754, 1165.6684, 1179.6771, 1184.6858, 1193.6977, 1195.6893, 1201.7343, 1229.8974, 1232.6901, 1253.7005, 1259.2801, 1263.2247, 1263.7024, 1266.7035, 1277.7589, 1280.7521, 1283.7721, 1302.8009, 1306.7653, 1308.7528, 1310.3027, 1320.6798, 1323.2817, 1323.7637, 1324.7890, 1326.3207, 1329.7326, 1340.7775, 1343.7777, 1357.7890, 1365.7525, 1373.7532, 1393.8069, 1407.7954, 1422.8033, 1434.8643, 1460.8550, 1475.8557, 1490.8367, 1493.8451, 1549.8969, 1598.9377, 1638.9642, 1657.9317, 1684.0126, 1699.9639, 1707.9051, 1716.9715, 1740.9356, 1781.0033, 1789.0003, 1791.8887, 1804.0297, 1839.0630, 1847.0491, 1852.0436, 1983.1414, 1989.1250, 2001.0988, 2083.1533, 2128.1603, 2211.2706, 2215.3315, 2286.2807, 2299.3189, 2329.2726, 2343.2471, 2384.1325, 2399.2011, 2441.2881, 2501.4182, 2705.3310, 2717.2530, 2848.5165, 2869.5420, 3223.3745, 3264.5742, 3312.3559 |           |           |        |       |     |      |      |                                             |
| 20. <a href="#">RPOC PSYCK</a> Mass: 155806 Score: 52 Expect: 2.1 Matches: 15                                                                                                                                                                                                                                                                                                                                                                                                                                                                                                                                                                                                                                                                                                                                                                                                                                                                                                                                                                                                                                                                                              |           |           |        |       |     |      |      |                                             |
| DNA-directed RNA polymerase subunit beta' OS=Psychrobacter cryohalolentis (strain K5) OX=335284 GN=rpoC PE=3 SV=1                                                                                                                                                                                                                                                                                                                                                                                                                                                                                                                                                                                                                                                                                                                                                                                                                                                                                                                                                                                                                                                          |           |           |        |       |     |      |      |                                             |
| Observed                                                                                                                                                                                                                                                                                                                                                                                                                                                                                                                                                                                                                                                                                                                                                                                                                                                                                                                                                                                                                                                                                                                                                                   | Mr (expt) | Mr (calc) | ppm    | Start | End | Miss | Ions | Peptide                                     |
| 982.5138                                                                                                                                                                                                                                                                                                                                                                                                                                                                                                                                                                                                                                                                                                                                                                                                                                                                                                                                                                                                                                                                                                                                                                   | 981.5065  | 981.4879  | 18.9   | 785   | -   | 793  | 0    | --- K.TANSGLTR.R                            |
| 1109.5910                                                                                                                                                                                                                                                                                                                                                                                                                                                                                                                                                                                                                                                                                                                                                                                                                                                                                                                                                                                                                                                                                                                                                                  | 1108.5837 | 1108.4893 | 85.2   | 691   | -   | 700  | 0    | --- K.AMMDNLATDK.I                          |
| 1153.6950                                                                                                                                                                                                                                                                                                                                                                                                                                                                                                                                                                                                                                                                                                                                                                                                                                                                                                                                                                                                                                                                                                                                                                  | 1152.6877 | 1152.6866 | 0.89   | 380   | -   | 390  | 0    | --- K.LLSHGLATTK.A                          |
| 1184.6858                                                                                                                                                                                                                                                                                                                                                                                                                                                                                                                                                                                                                                                                                                                                                                                                                                                                                                                                                                                                                                                                                                                                                                  | 1183.6785 | 1183.7037 | -21.28 | 310   | -   | 320  | 1    | --- R.AITGSNKRPLK.S                         |
| 1201.7343                                                                                                                                                                                                                                                                                                                                                                                                                                                                                                                                                                                                                                                                                                                                                                                                                                                                                                                                                                                                                                                                                                                                                                  | 1200.7270 | 1200.6350 | 76.7   | 1273  | -   | 1283 | 1    | --- K.ALNAKLEAEDK.F                         |

```

1283.7721 1282.7648 1282.7721 -5.71 830 - 841 1 --- K.LGELVLGRVTR.D
1332.7618 1331.7545 1331.6834 53.4 677 - 687 1 --- K.VVDIWSRTNDK.V
1407.7954 1406.7882 1406.8180 -21.21 1238 - 1248 1 --- K.HIEVLIHQMLR.K
1549.8969 1548.8896 1548.8552 22.3 1083 - 1095 0 16 K.EVVYFLPAETIIR.V
1657.9317 1656.9244 1656.9232 0.71 119 - 132 1 --- R.IGLLLDMLTRDIER.V
1684.0126 1683.0054 1682.8952 65.5 1111 - 1127 1 --- R.VPQASSGKBITGGGLPR.V
1716.9715 1715.9642 1715.8624 59.3 293 - 307 1 --- R.MLQESVDALDNGRR.G
1791.8887 1790.8814 1790.9315 -28.00 760 - 775 0 15 R.EGLTVLQYFISTHGAR.K
2083.1533 2082.1461 2081.9762 81.6 1139 - 1157 1 --- K.DHAIMAEMTGVVSPFKETK.G + 2 Oxidation (M)
2705.3310 2704.3238 2704.1893 49.7 572 - 593 0 --- R.LLIWNIMPVGMSPFDECNEMTK.K + 3 Oxidation (M)
No match to: 720.3201, 721.3315, 724.3214, 804.3108, 842.5642, 865.5456, 870.5940, 881.3242, 969.5548, 973.5948, 1033.5958,
1037.6072, 1045.6282, 1047.6804, 1064.6488, 1072.6447, 1077.2496, 1082.6362, 1093.6181, 1107.6212, 1118.5838, 1140.6515,
1163.6855, 1164.6754, 1165.6684, 1179.6771, 1193.6977, 1195.6893, 1229.8974, 1232.6901, 1253.7005, 1259.2801, 1259.7540,
1263.2247, 1263.7024, 1266.7035, 1277.7589, 1280.7521, 1302.8009, 1306.7653, 1308.7528, 1310.3027, 1320.6798, 1323.2817,
1323.7637, 1324.7890, 1326.3207, 1329.7326, 1340.7775, 1343.7777, 1357.7890, 1365.7525, 1373.7532, 1390.8324, 1393.8069,
1422.8033, 1434.8643, 1460.8550, 1475.8557, 1490.8367, 1493.8451, 1598.9377, 1638.9642, 1699.9639, 1707.9051, 1740.9356,
1781.0033, 1789.0003, 1804.0297, 1839.0630, 1847.0491, 1852.0436, 1983.1414, 1989.1250, 2001.0988, 2128.1603, 2211.2706,
2215.3315, 2286.2807, 2299.3189, 2329.2726, 2343.2471, 2384.1325, 2399.2011, 2441.2881, 2501.4182, 2510.3224, 2717.2530,
2848.5165, 2869.5420, 3223.3745, 3264.5742, 3312.3559

```

## Search Parameters

```

Type of search      : MS/MS Ion Search
Enzyme              : Trypsin
Fixed modifications : Carbamidomethyl (C)
Variable modifications : Oxidation (M)
Mass values        : Monoisotopic
Protein Mass       : Unrestricted
Peptide Mass Tolerance : ± 100 ppm
Fragment Mass Tolerance : ± 2 Da
Max Missed Cleavages : 1
Instrument type     : MALDI-TOF-TOF
  Query1 (720.3201,1+) : <no title>
  Query2 (721.3315,1+) : <no title>
  Query3 (724.3214,1+) : <no title>
  Query4 (804.3108,1+) : <no title>
  Query5 (842.5642,1+) : <no title>
  Query6 (865.5456,1+) : <no title>
  Query7 (870.5940,1+) : <no title>
  Query8 (881.3242,1+) : <no title>
  Query9 (969.5548,1+) : <no title>
  Query10 (973.5948,1+) : <no title>
  Query11 (982.5138,1+) : <no title>
  Query12 (1033.5958,1+) : <no title>
  Query13 (1037.6072,1+) : <no title>
  Query14 (1045.6282,1+) : <no title>
  Query15 (1047.6804,1+) : <no title>
  Query16 (1064.6488,1+) : <no title>
  Query17 (1072.6447,1+) : <no title>
  Query18 (1077.2496,1+) : <no title>
  Query19 (1082.6362,1+) : <no title>
  Query20 (1093.6181,1+) : <no title>
  Query21 (1107.6212,1+) : <no title>
  Query22 (1109.5910,1+) : <no title>
  Query23 (1118.5838,1+) : <no title>
  Query24 (1140.6515,1+) : <no title>
  Query25 (1153.6950,1+) : <no title>
  Query26 (1163.6855,1+) : <no title>
  Query27 (1164.6754,1+) : <no title>
  Query28 (1165.6684,1+) : <no title>
  Query29 (1179.6771,1+) : <no title>
  Query30 (1184.6858,1+) : <no title>
  Query31 (1193.6977,1+) : <no title>
  Query32 (1195.6893,1+) : <no title>
  Query33 (1201.7343,1+) : <no title>
  Query34 (1229.8974,1+) : <no title>
  Query35 (1232.6901,1+) : <no title>
  Query36 (1253.7005,1+) : <no title>
  Query37 (1259.2801,1+) : <no title>
  Query38 (1259.7540,1+) : <no title>
  Query39 (1263.2247,1+) : <no title>
  Query40 (1263.7024,1+) : <no title>
  Query41 (1266.7035,1+) : <no title>
  Query42 (1277.7589,1+) : <no title>
  Query43 (1280.7521,1+) : <no title>
  Query44 (1283.7721,1+) : <no title>
  Query45 (1302.8009,1+) : <no title>
  Query46 (1306.7653,1+) : <no title>
  Query47 (1308.7528,1+) : <no title>
  Query48 (1310.3027,1+) : <no title>
  Query49 (1320.6798,1+) : <no title>
  Query50 (1323.2817,1+) : <no title>
  Query51 (1323.7637,1+) : <no title>
  Query52 (1324.7890,1+) : <no title>
  Query53 (1326.3207,1+) : <no title>
  Query54 (1329.7326,1+) : <no title>
  Query55 (1332.7618,1+) : <no title>
  Query56 (1340.7775,1+) : <no title>
  Query57 (1343.7777,1+) : <no title>
  Query58 (1357.7890,1+) : <no title>
  Query59 (1365.7525,1+) : <no title>
  Query60 (1373.7532,1+) : <no title>
  Query61 (1390.8324,1+) : <no title>
  Query62 (1393.8069,1+) : <no title>
  Query63 (1407.7954,1+) : <no title>
  Query64 (1422.8033,1+) : <no title>
  Query65 (1434.8643,1+) : <no title>
  Query66 (1460.8550,1+) : <no title>
  Query67 (1475.8557,1+) : <no title>
  Query68 (1490.8367,1+) : <no title>
  Query69 (1493.8451,1+) : <no title>
  Query70 (1549.8969,1+) : <no title>
  Query71 (1598.9377,1+) : <no title>

```



Query72 (1638.9642,1+) : <no title>  
Query73 (1657.9317,1+) : <no title>  
Query74 (1684.0126,1+) : <no title>  
Query75 (1699.9639,1+) : <no title>  
Query76 (1707.9051,1+) : <no title>  
Query77 (1716.9715,1+) : <no title>  
Query78 (1740.9356,1+) : <no title>  
Query79 (1781.0033,1+) : <no title>  
Query80 (1789.0003,1+) : <no title>  
Query81 (1791.8887,1+) : <no title>  
Query82 (1804.0297,1+) : <no title>  
Query83 (1839.0630,1+) : <no title>  
Query84 (1847.0491,1+) : <no title>  
Query85 (1852.0436,1+) : <no title>  
Query86 (1983.1414,1+) : <no title>  
Query87 (1989.1250,1+) : <no title>  
Query88 (2001.0988,1+) : <no title>  
Query89 (2083.1533,1+) : <no title>  
Query90 (2128.1603,1+) : <no title>  
Query91 (2211.2706,1+) : <no title>  
Query92 (2215.3315,1+) : <no title>  
Query93 (2286.2807,1+) : <no title>  
Query94 (2299.3189,1+) : <no title>  
Query95 (2329.2726,1+) : <no title>  
Query96 (2343.2471,1+) : <no title>  
Query97 (2384.1325,1+) : <no title>  
Query98 (2399.2011,1+) : <no title>  
Query99 (2441.2881,1+) : <no title>  
Query100 (2501.4182,1+) : <no title>  
Query101 (2510.3224,1+) : <no title>  
Query102 (2705.3310,1+) : <no title>  
Query103 (2717.2530,1+) : <no title>  
Query104 (2848.5165,1+) : <no title>  
Query105 (2869.5420,1+) : <no title>  
Query106 (3223.3745,1+) : <no title>  
Query107 (3264.5742,1+) : <no title>  
Query108 (3312.3559,1+) : <no title>

Mascot: <http://www.matrixscience.com/>
